# Supplementary material for: High throughput sequencing reveals novel and abiotic stress-regulated microRNAs in the inflorescences of rice
Source: PubMed Central journal article supplement (PMC3431262; doi:10.1186/1471-2229-12-132), 2012-08-03
Supplement: 1471-2229-12-132-S3.pdf [file 1471-2229-12-132-S3.pdf]

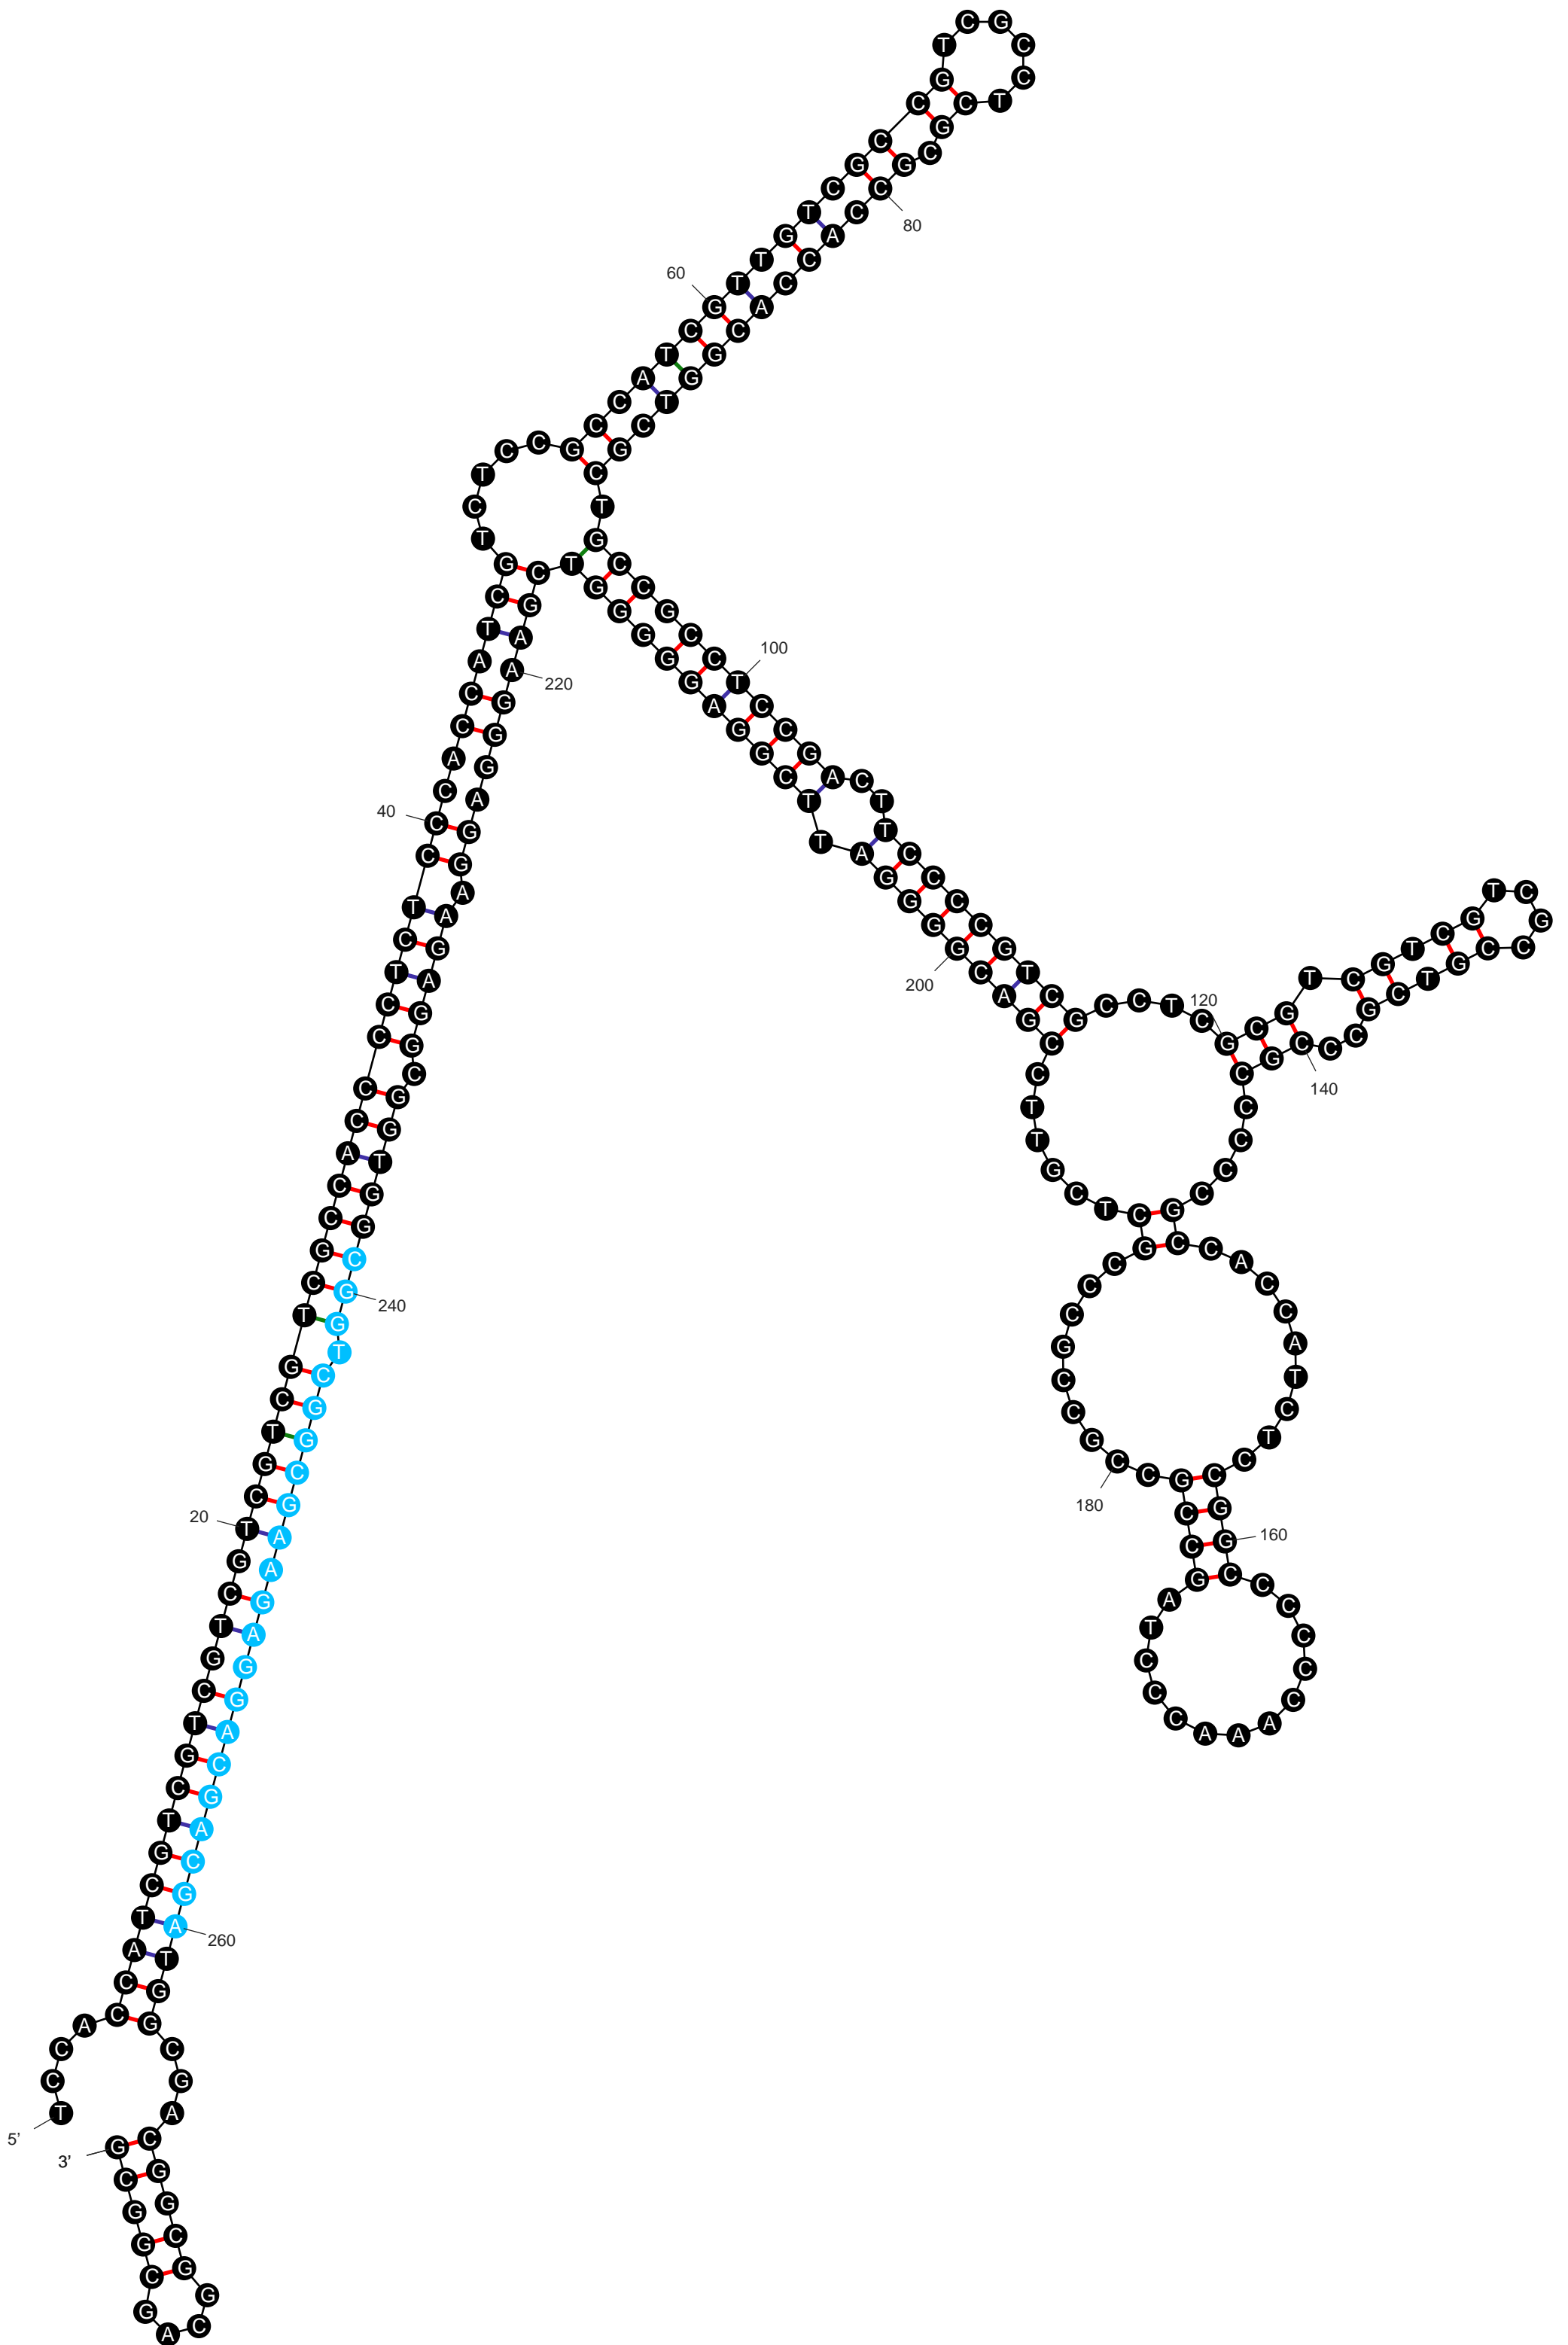

$dG = -133.70$  osa-cand001

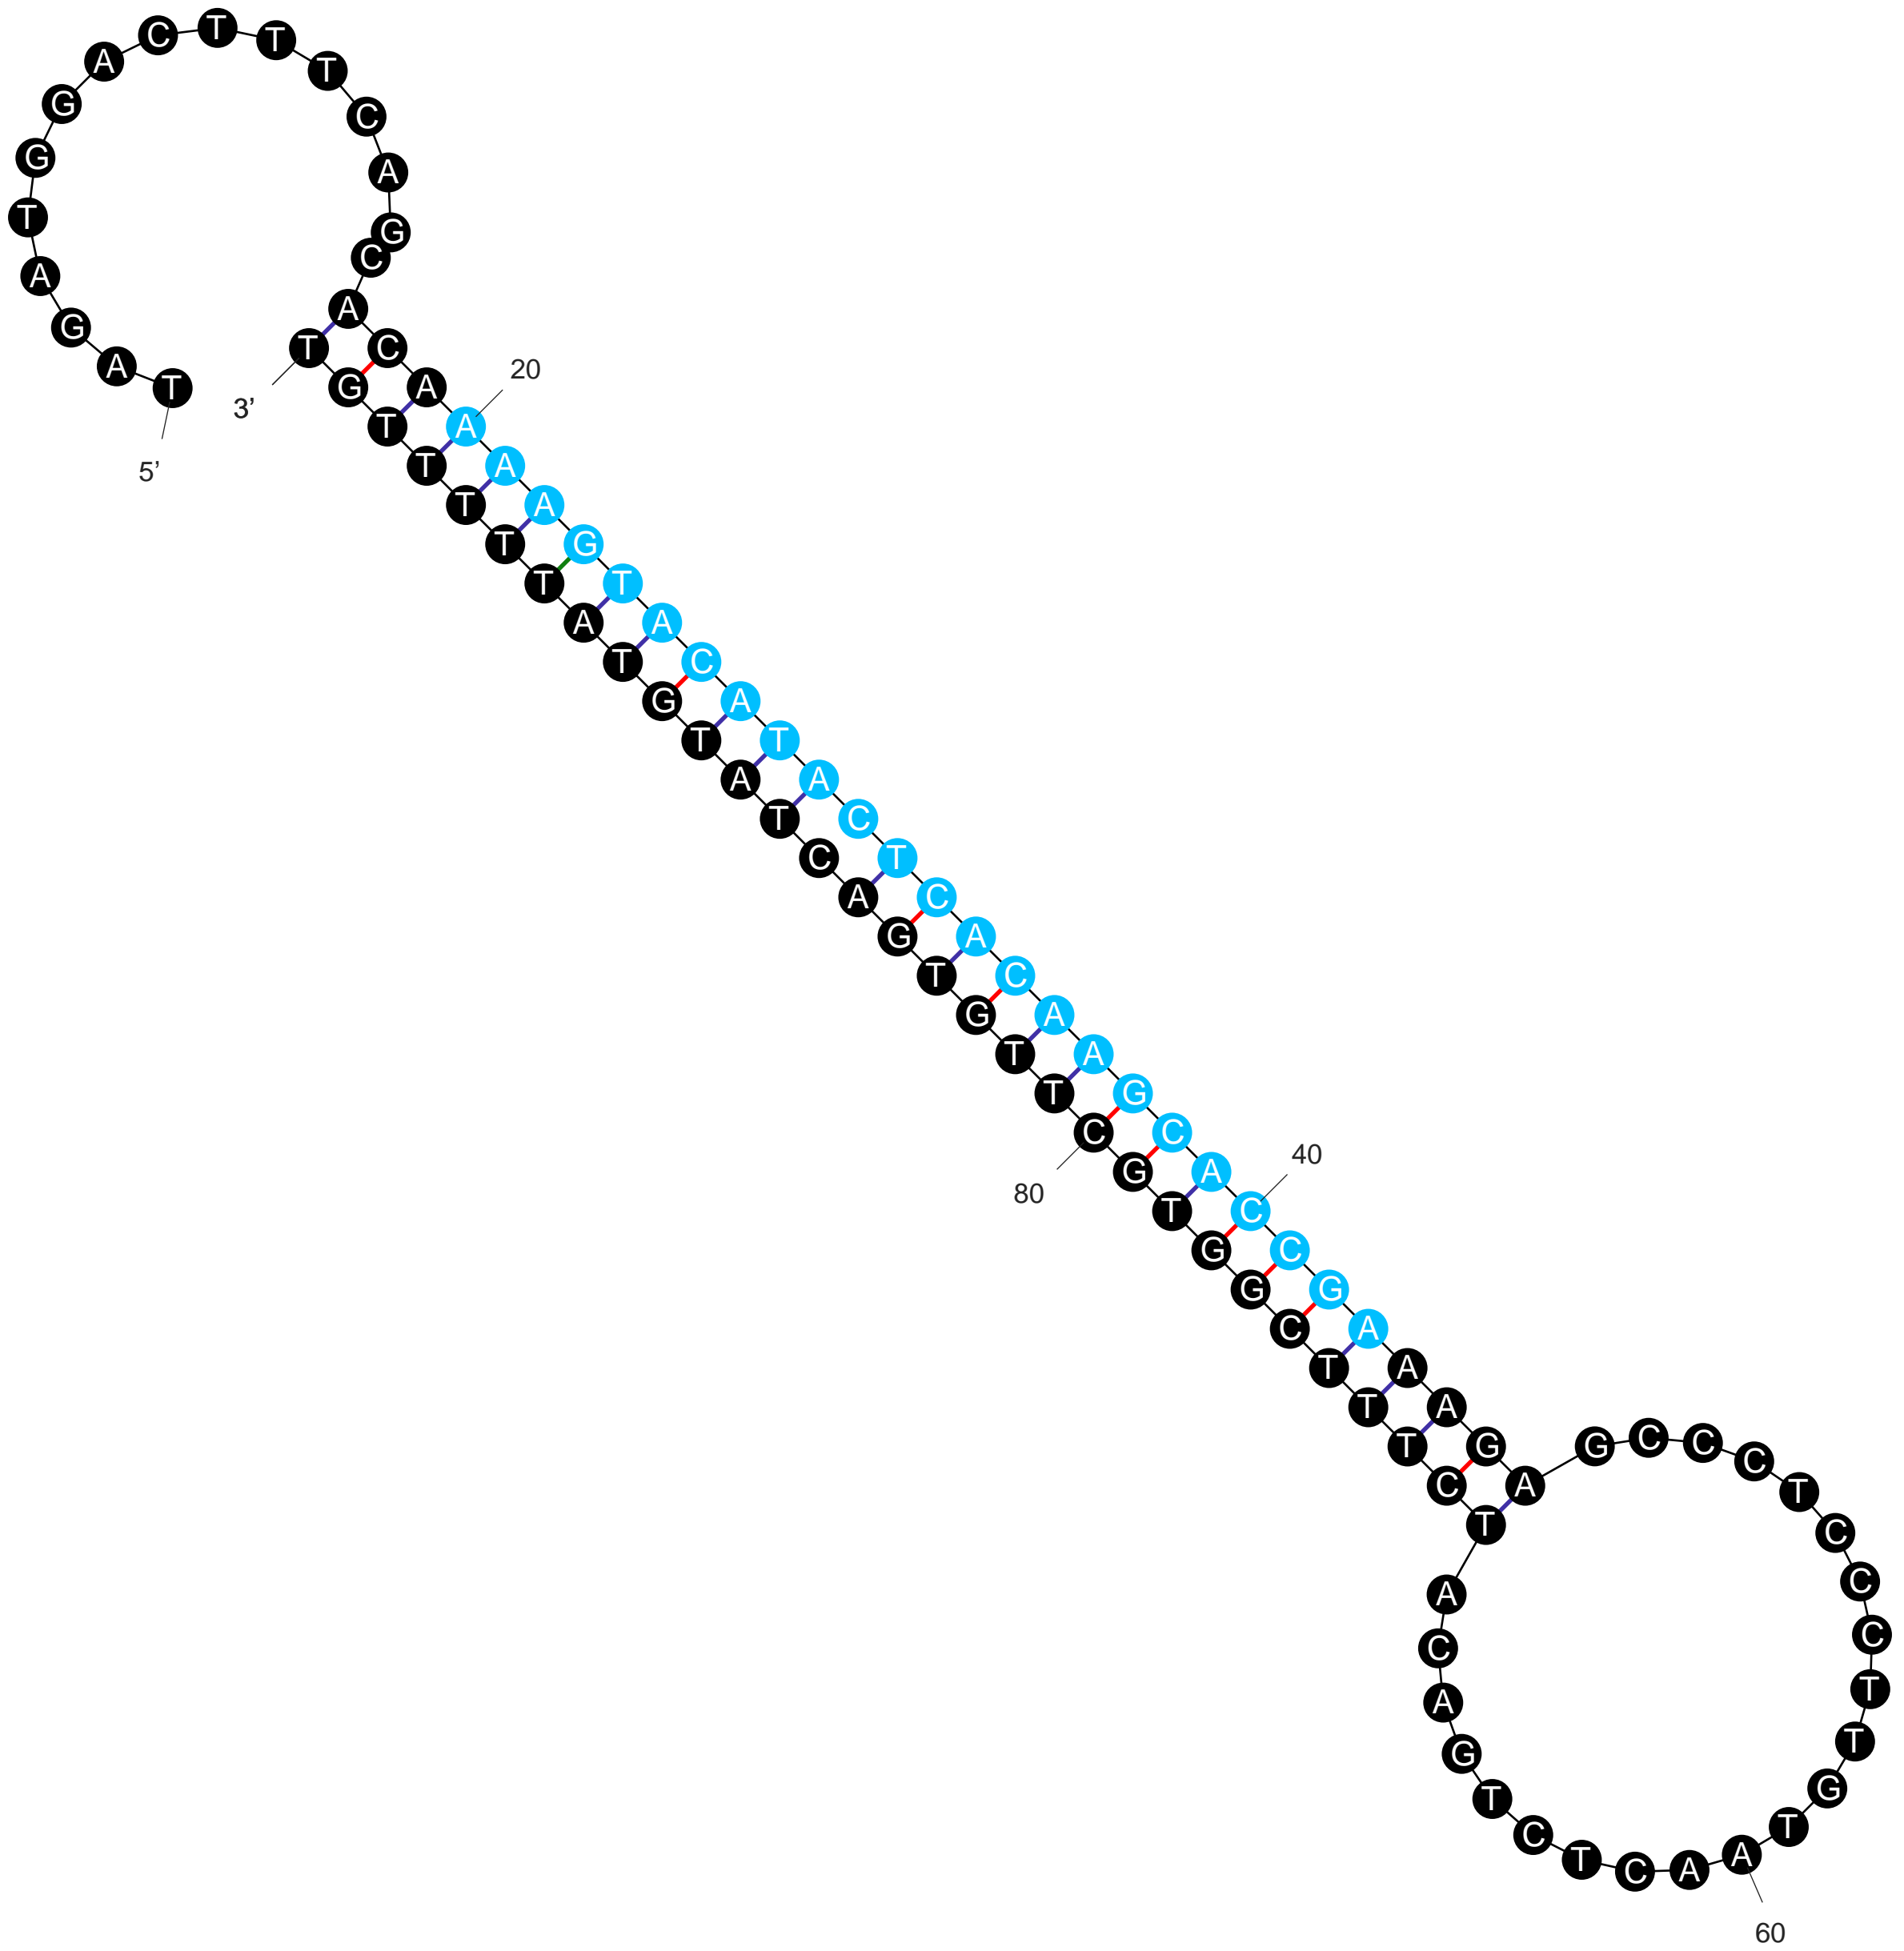

$dG = -42.80$  osa-cand002

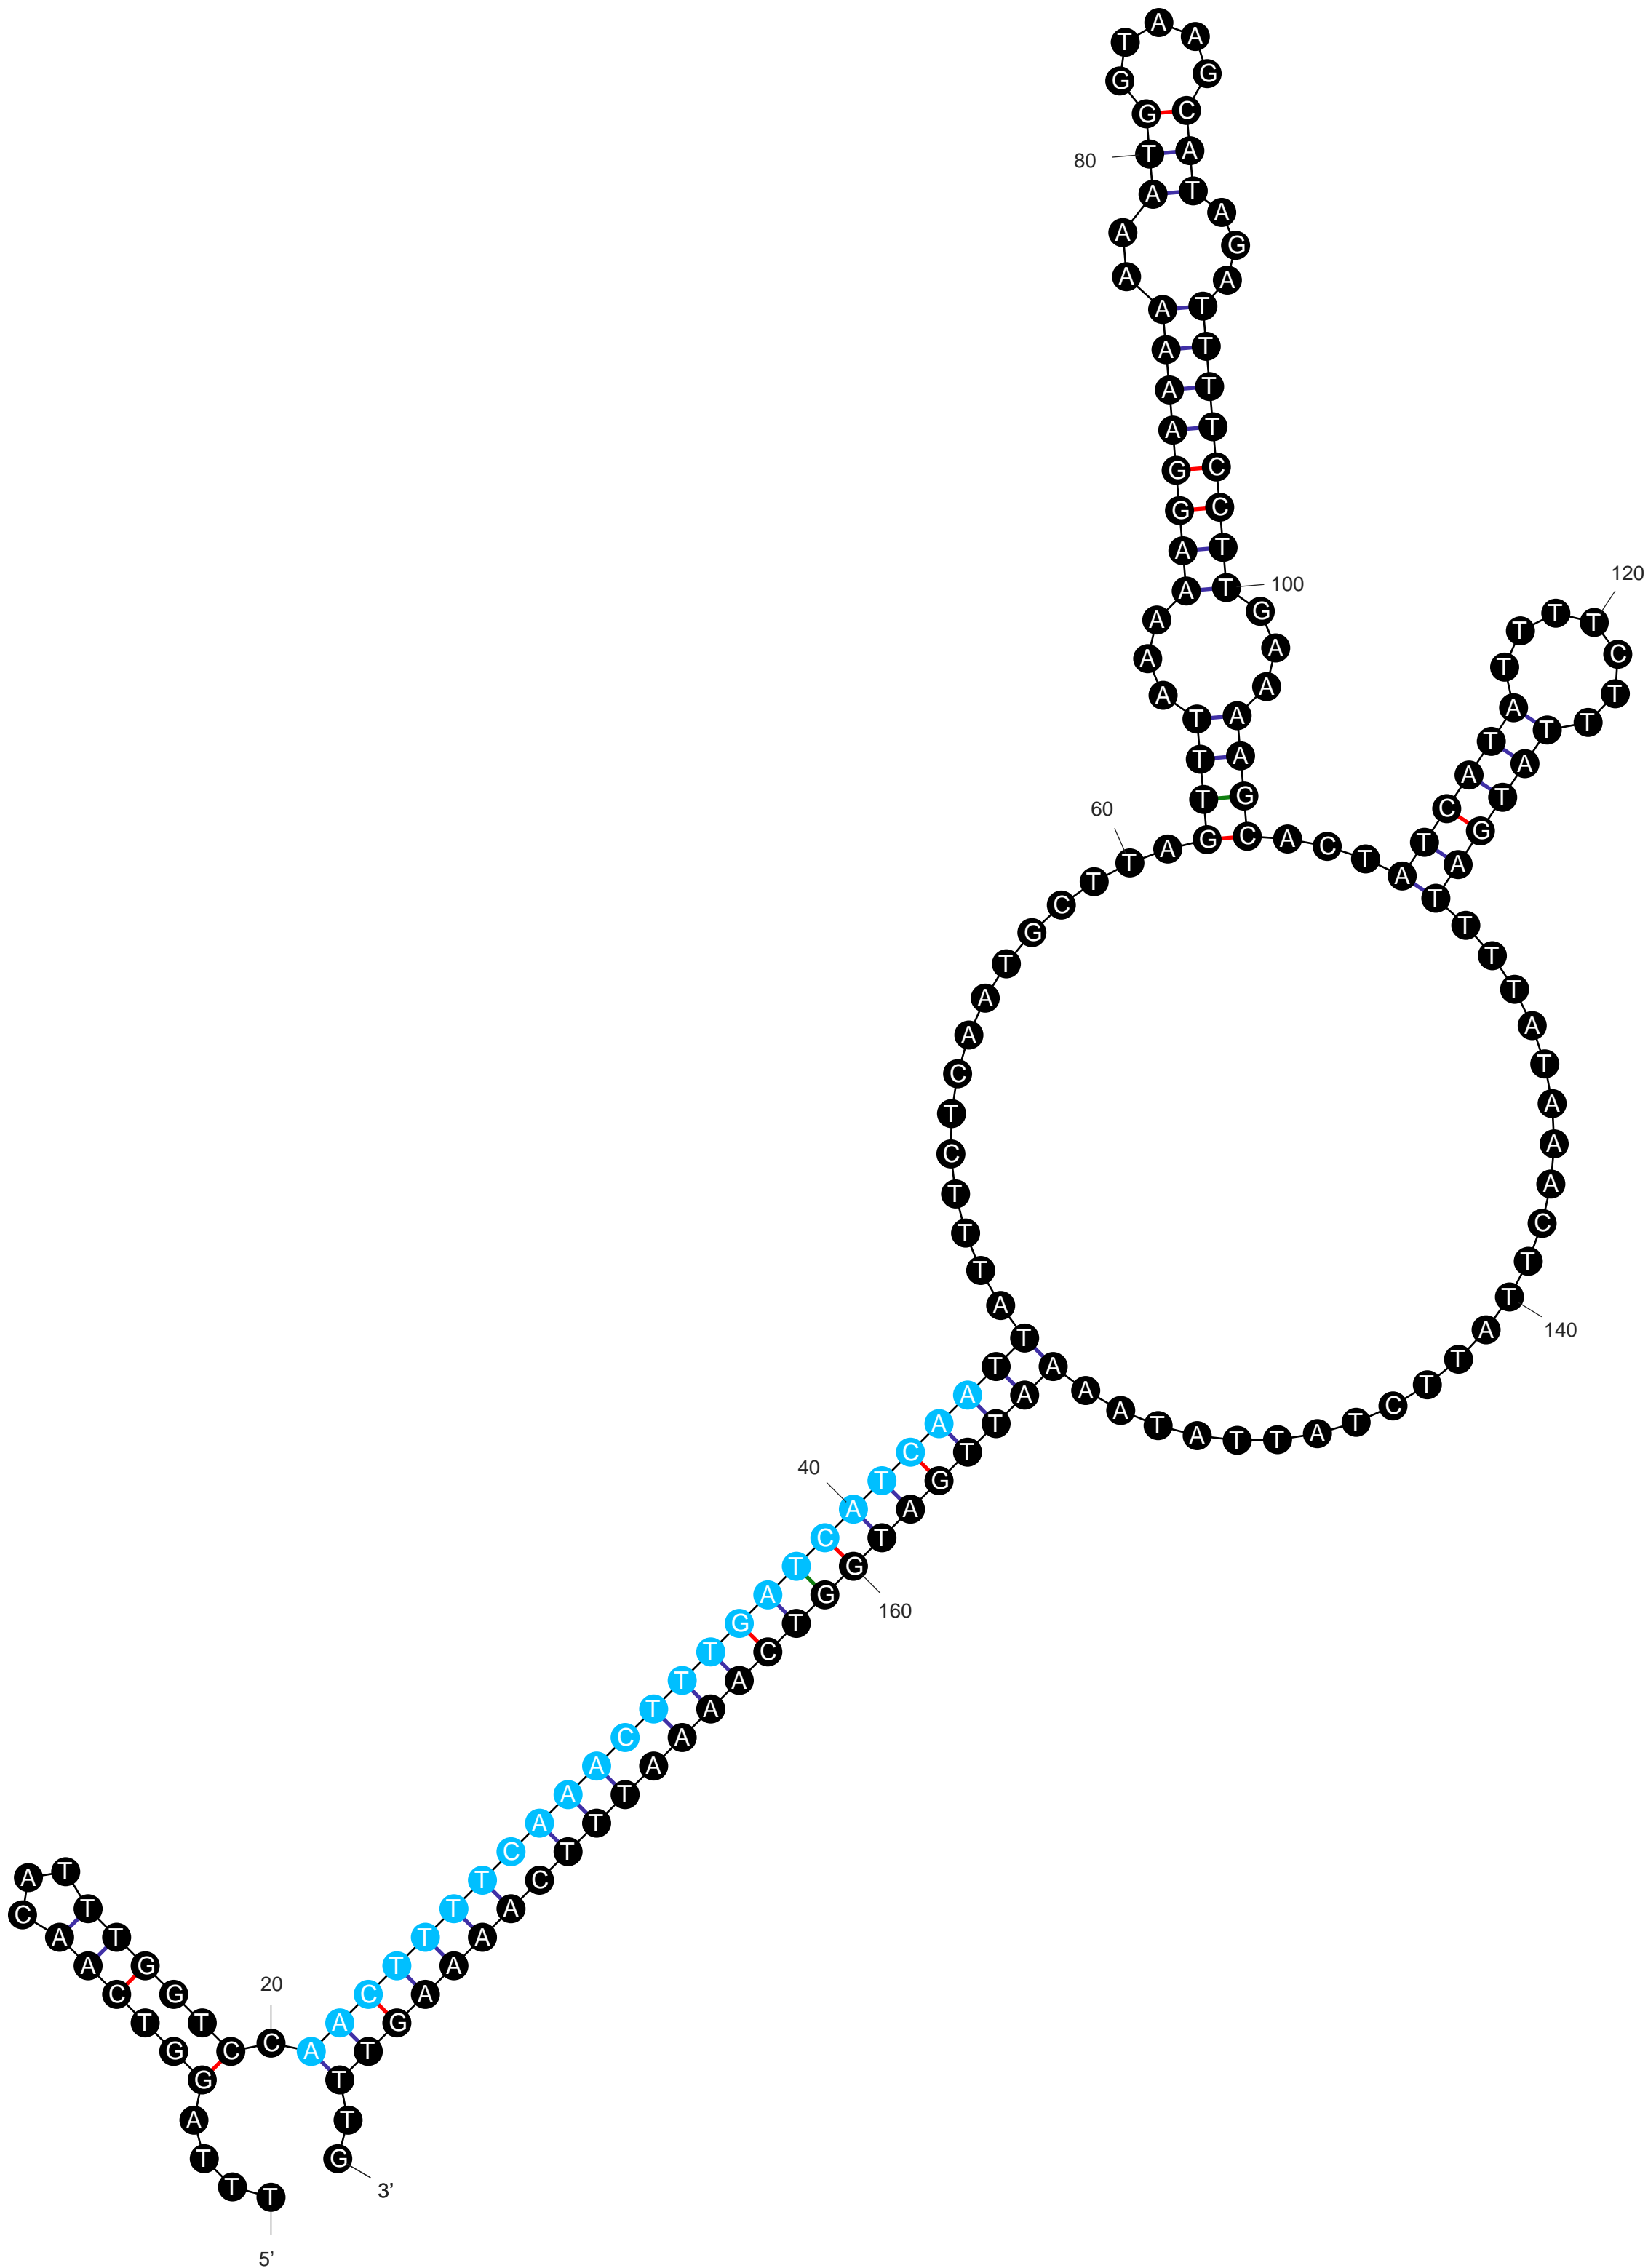

$dG = -36.80$  osa-cand003

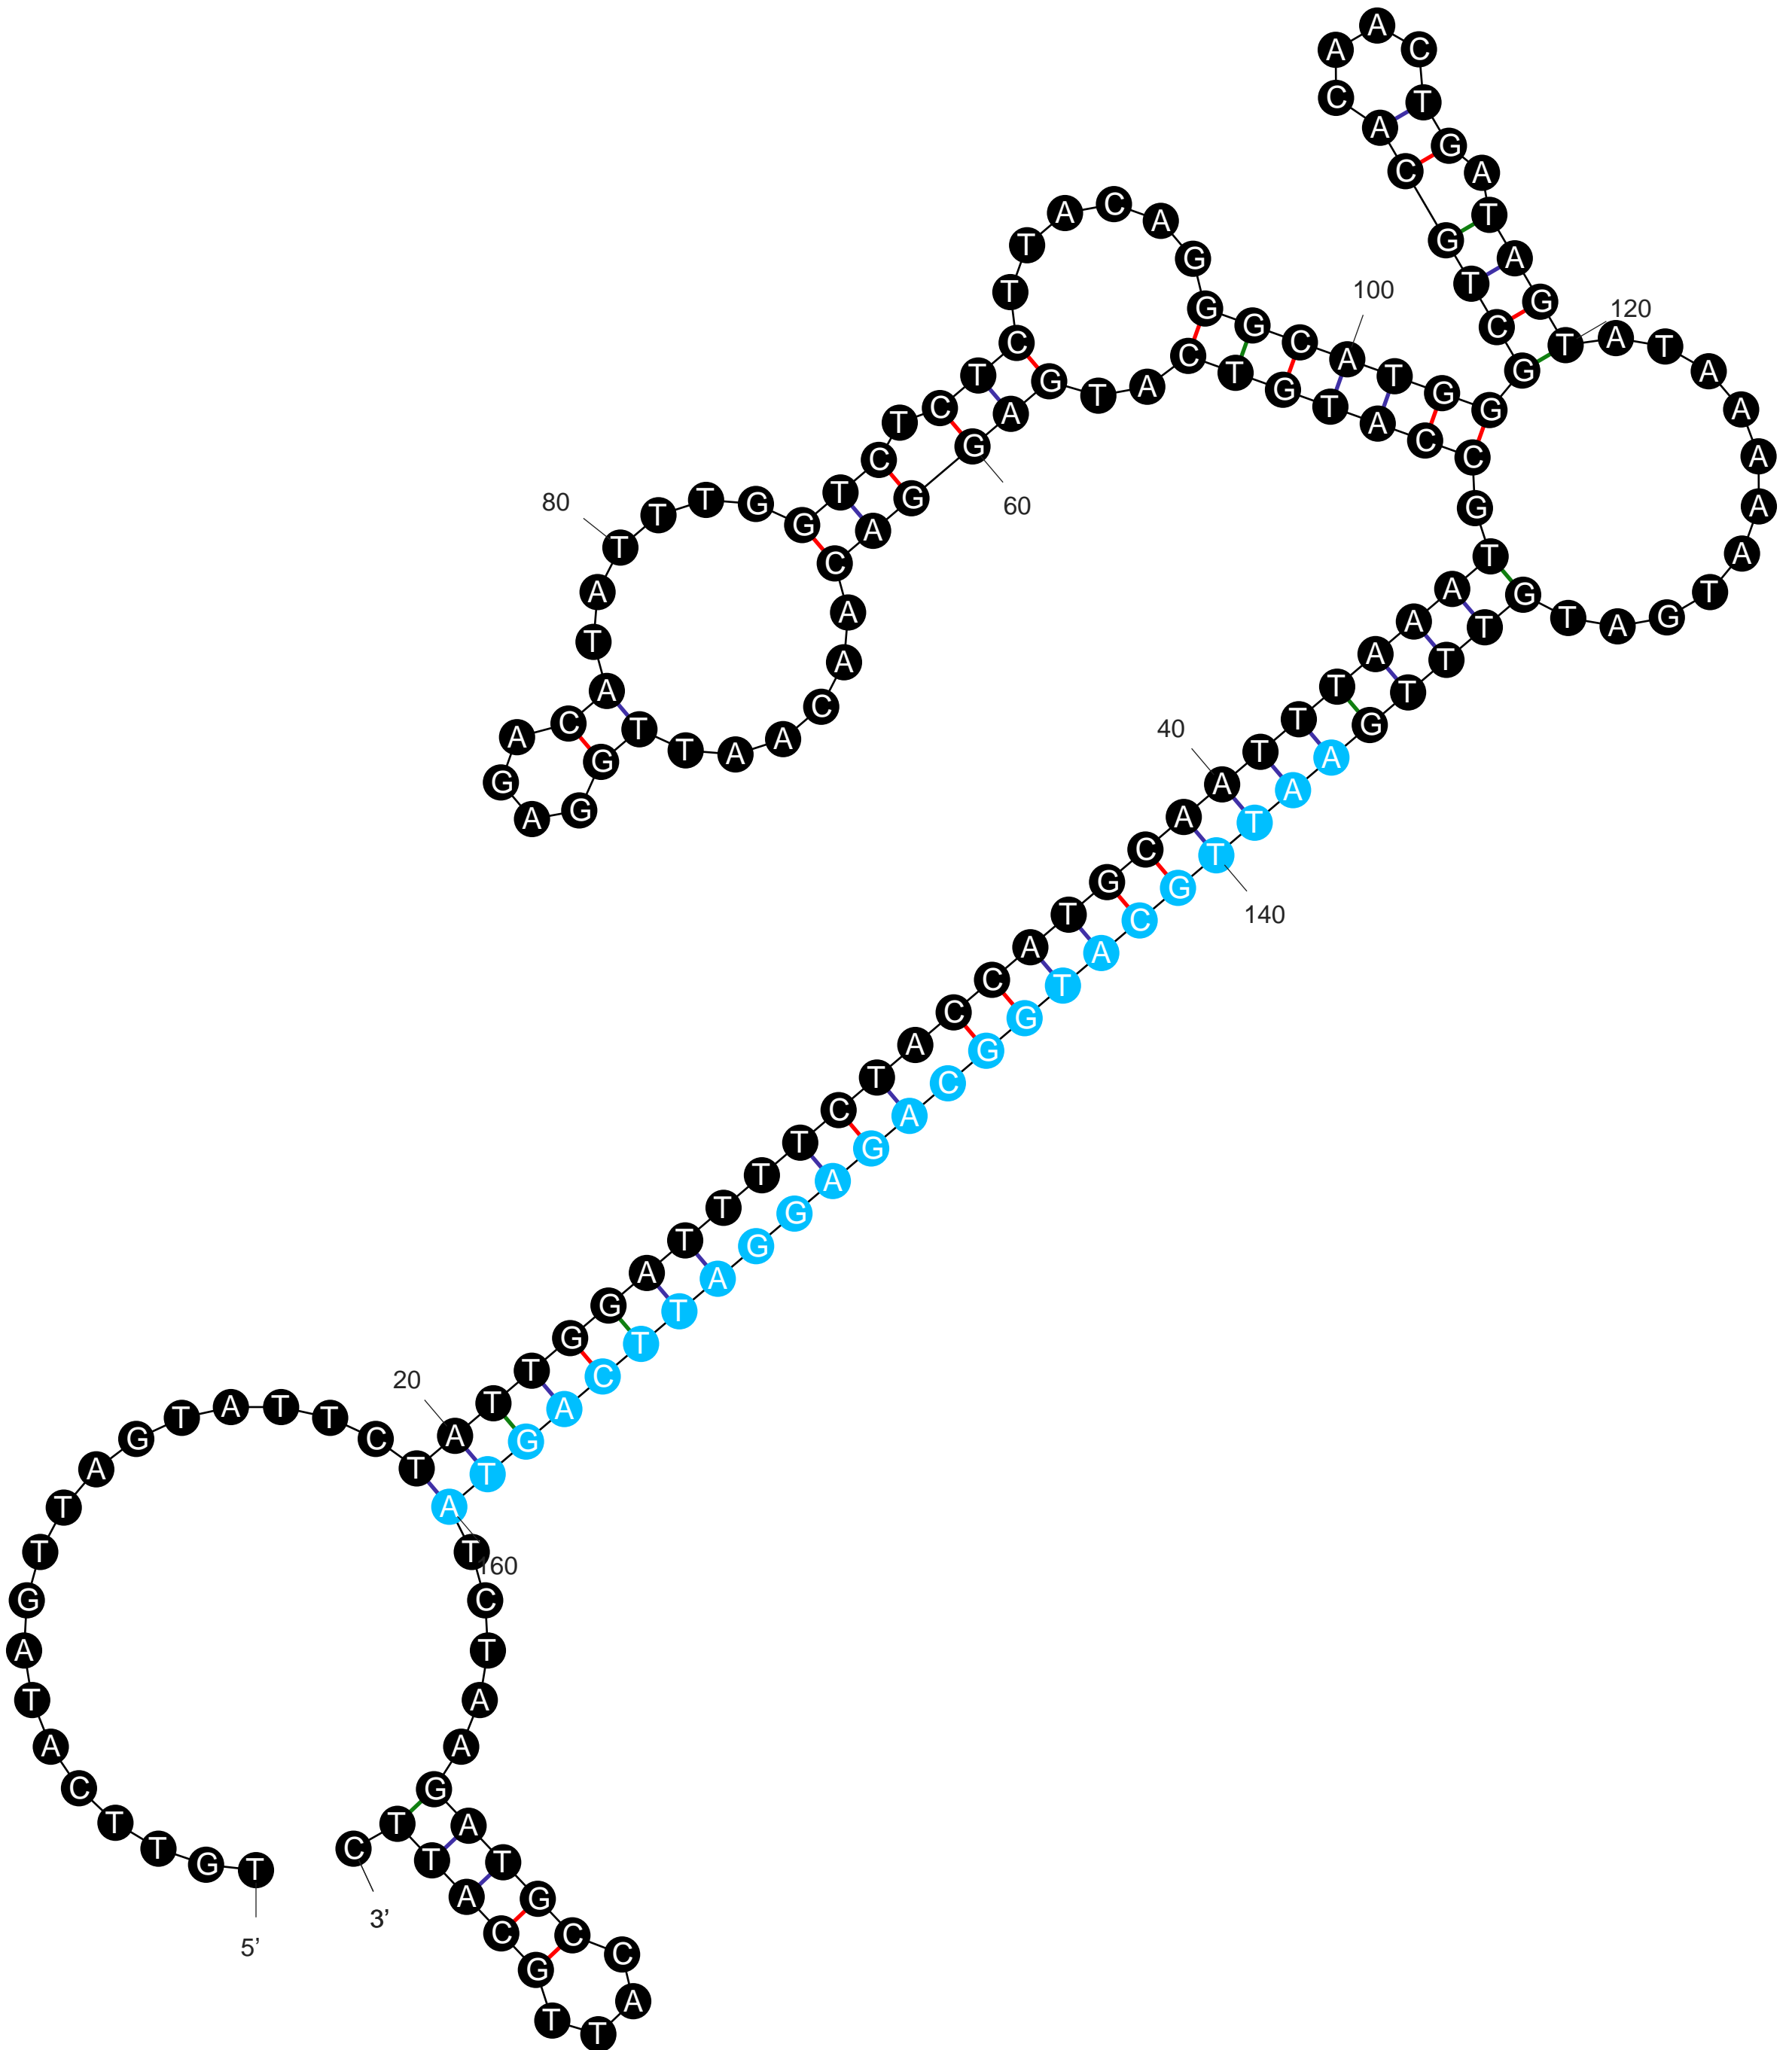

$dG = -56.10$  osa-cand004

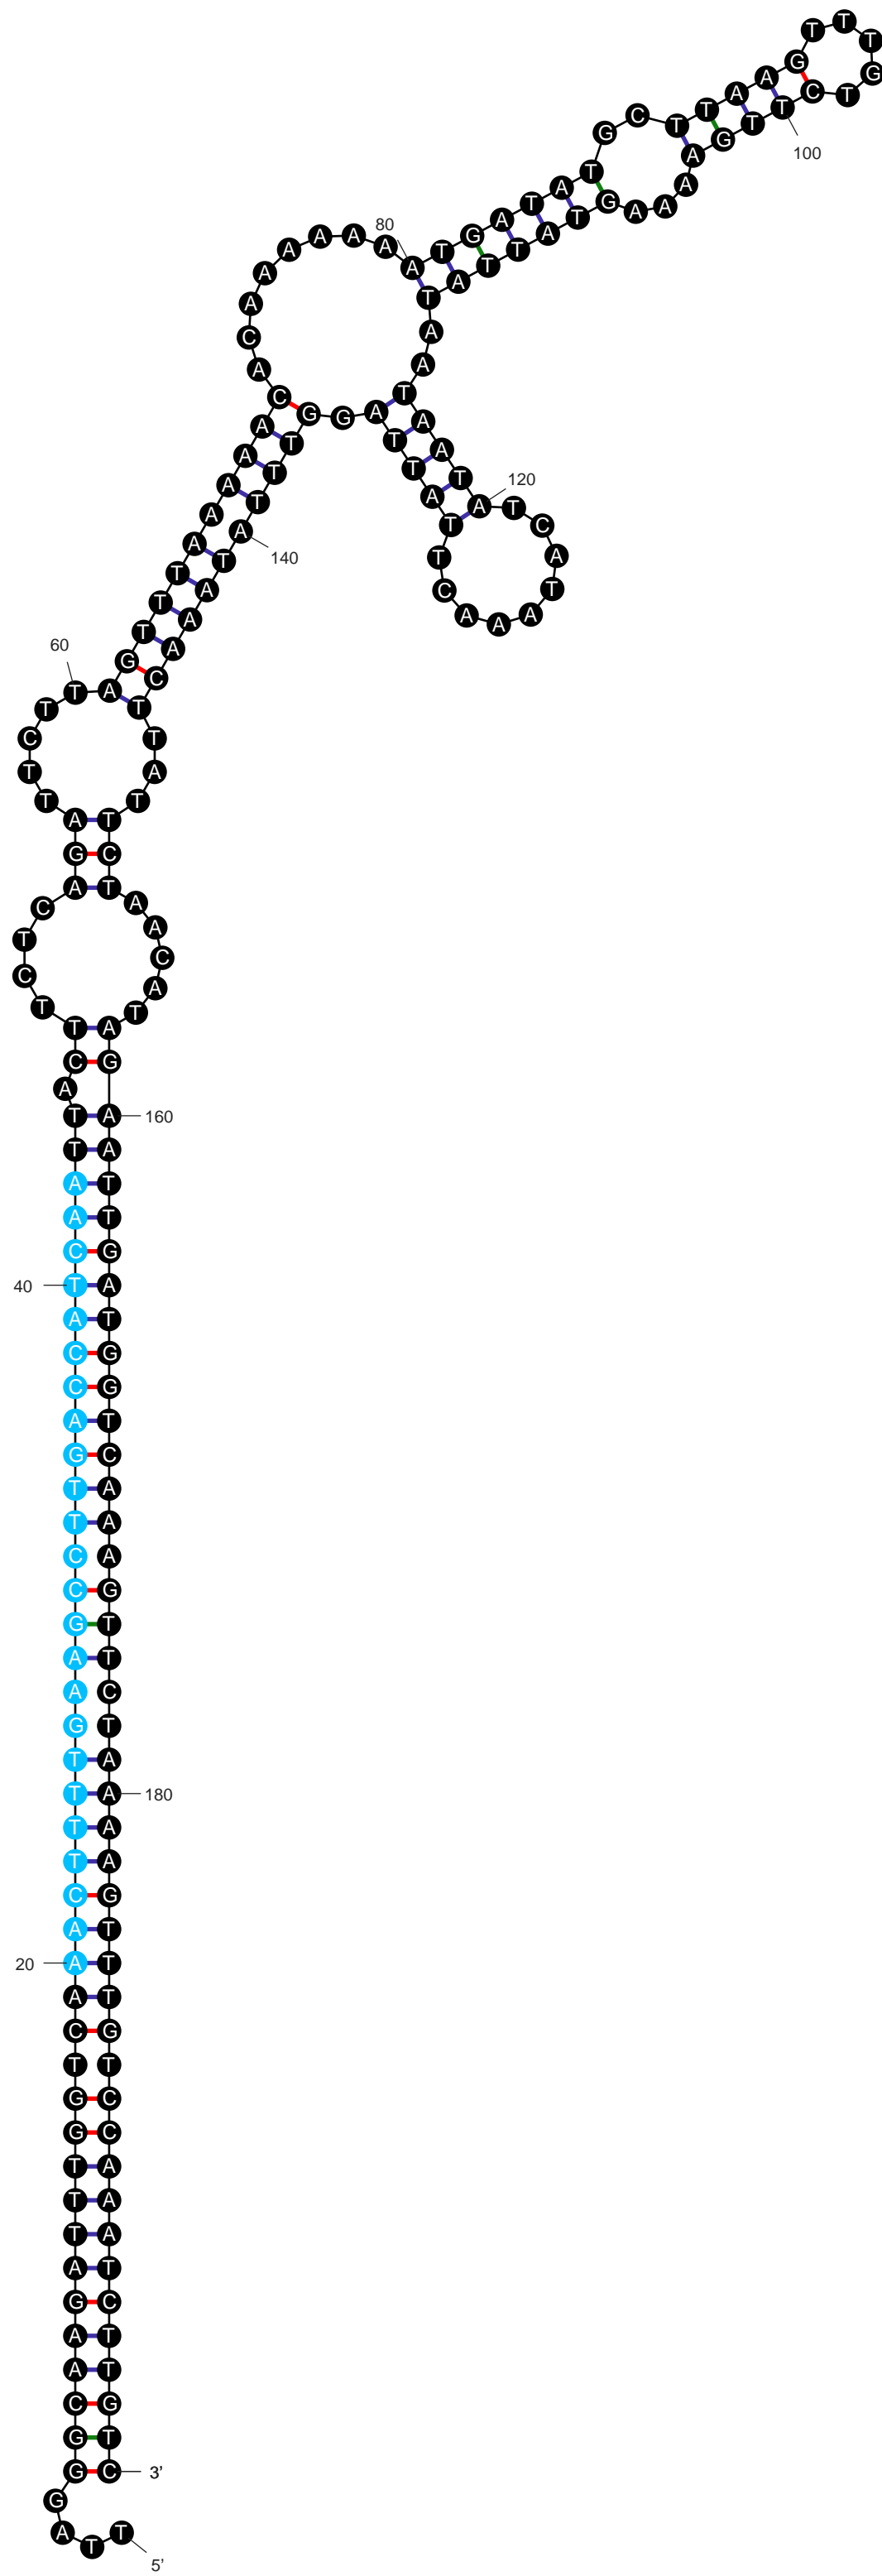

$dG = -65.10$  *osa-cand005a*

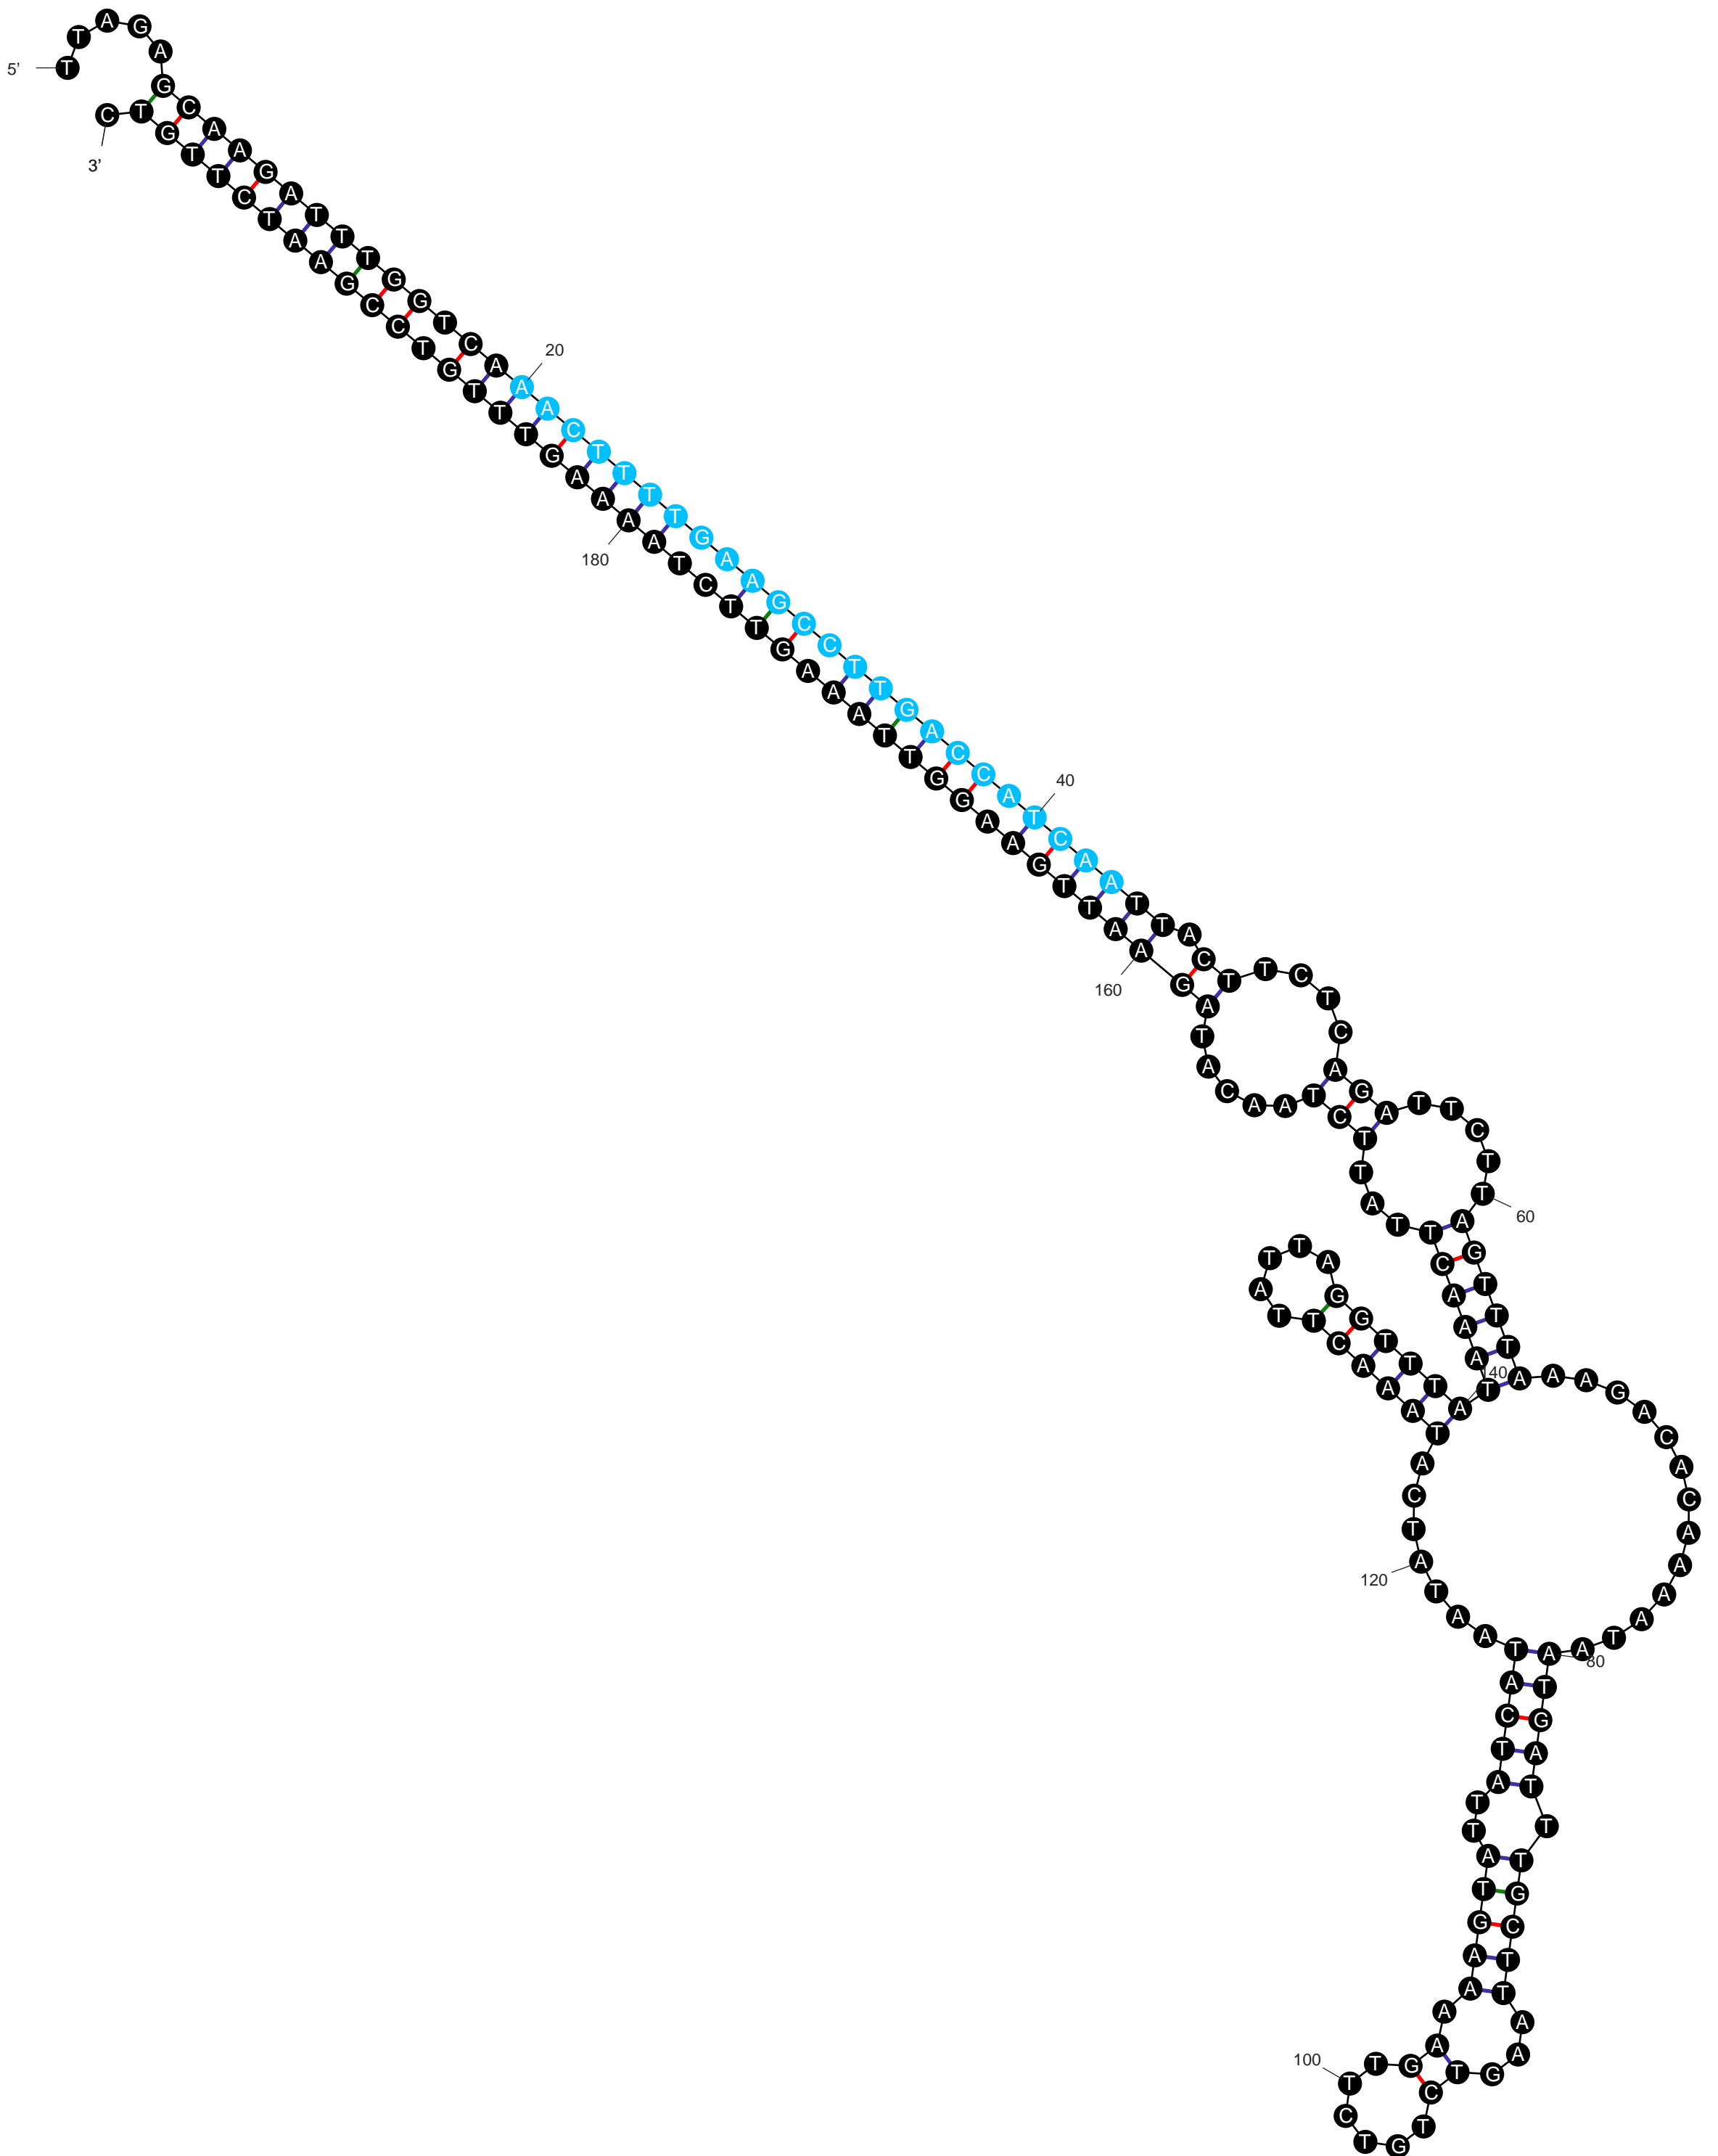

$dG = -55.50$  *osa-cand005b*

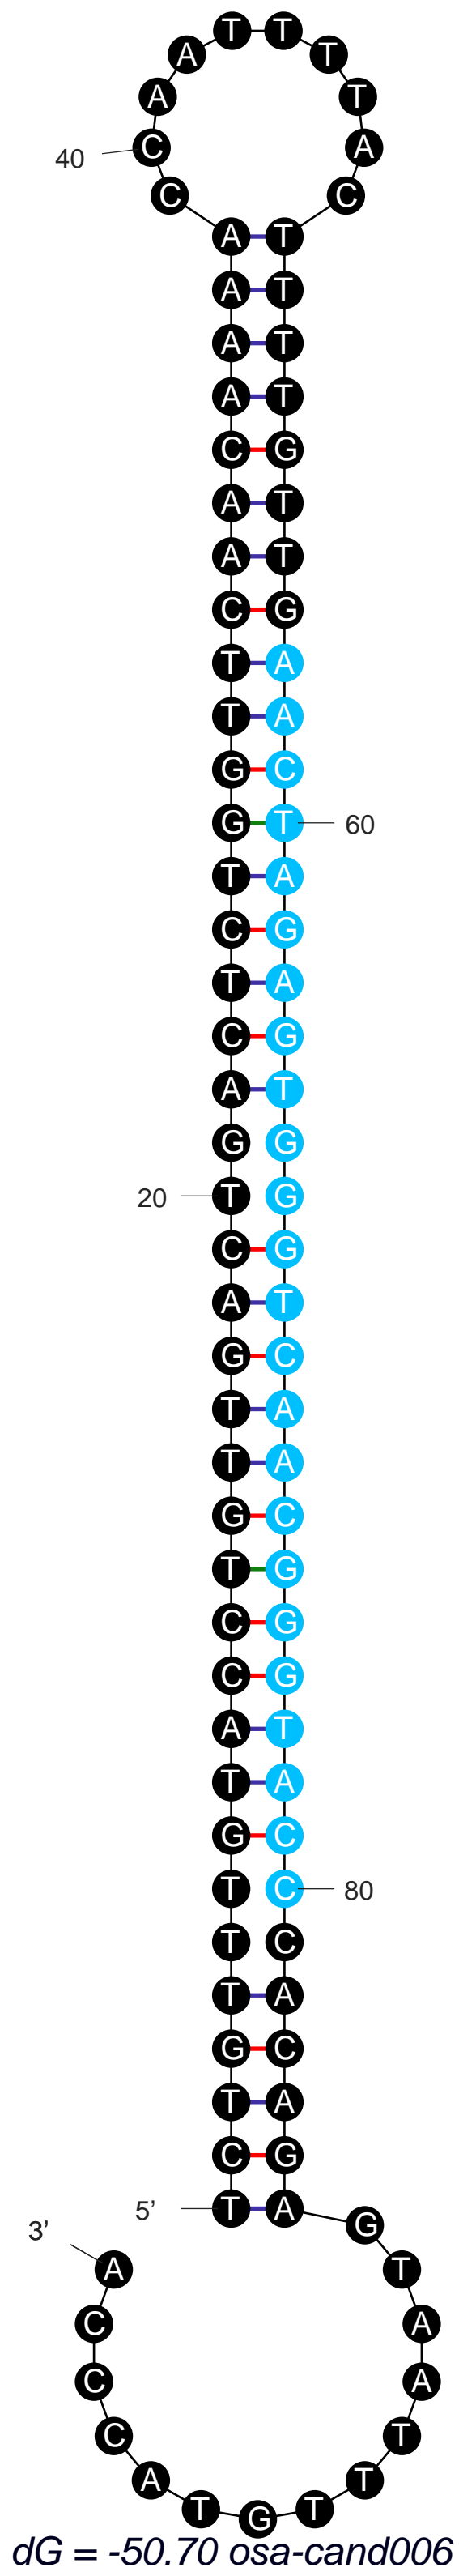

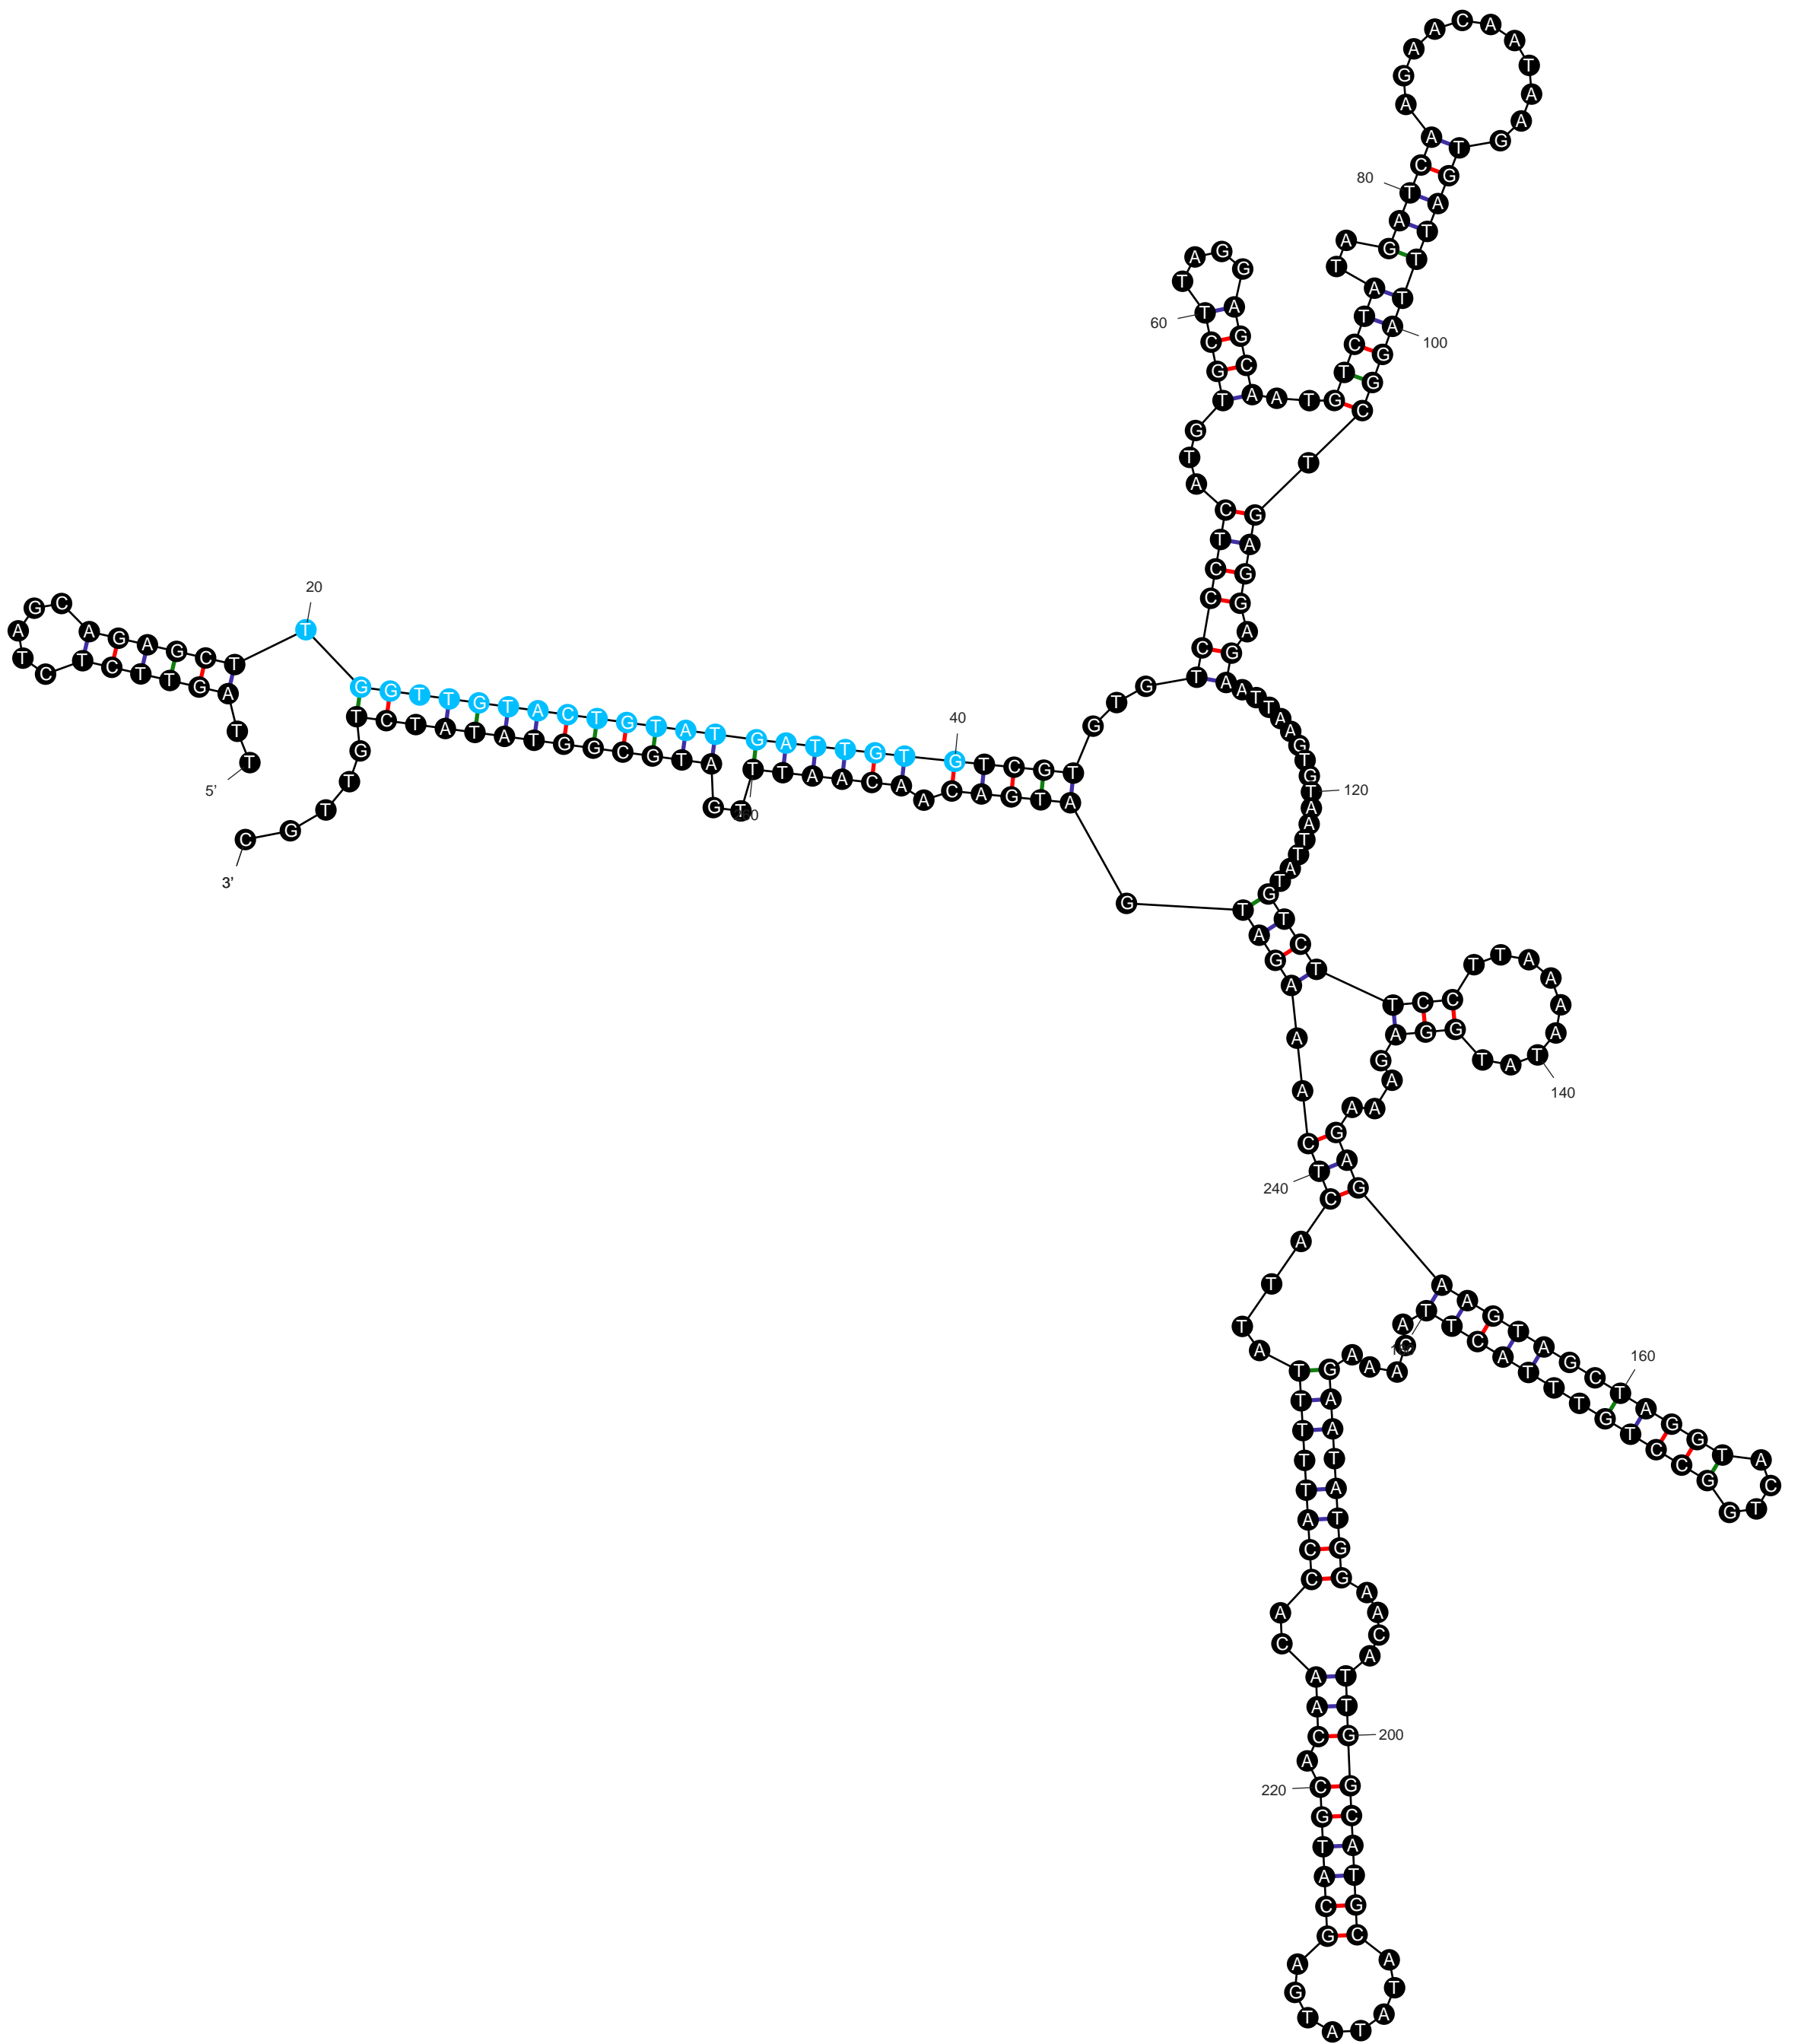

$dG = -68.00$  osa-cand007



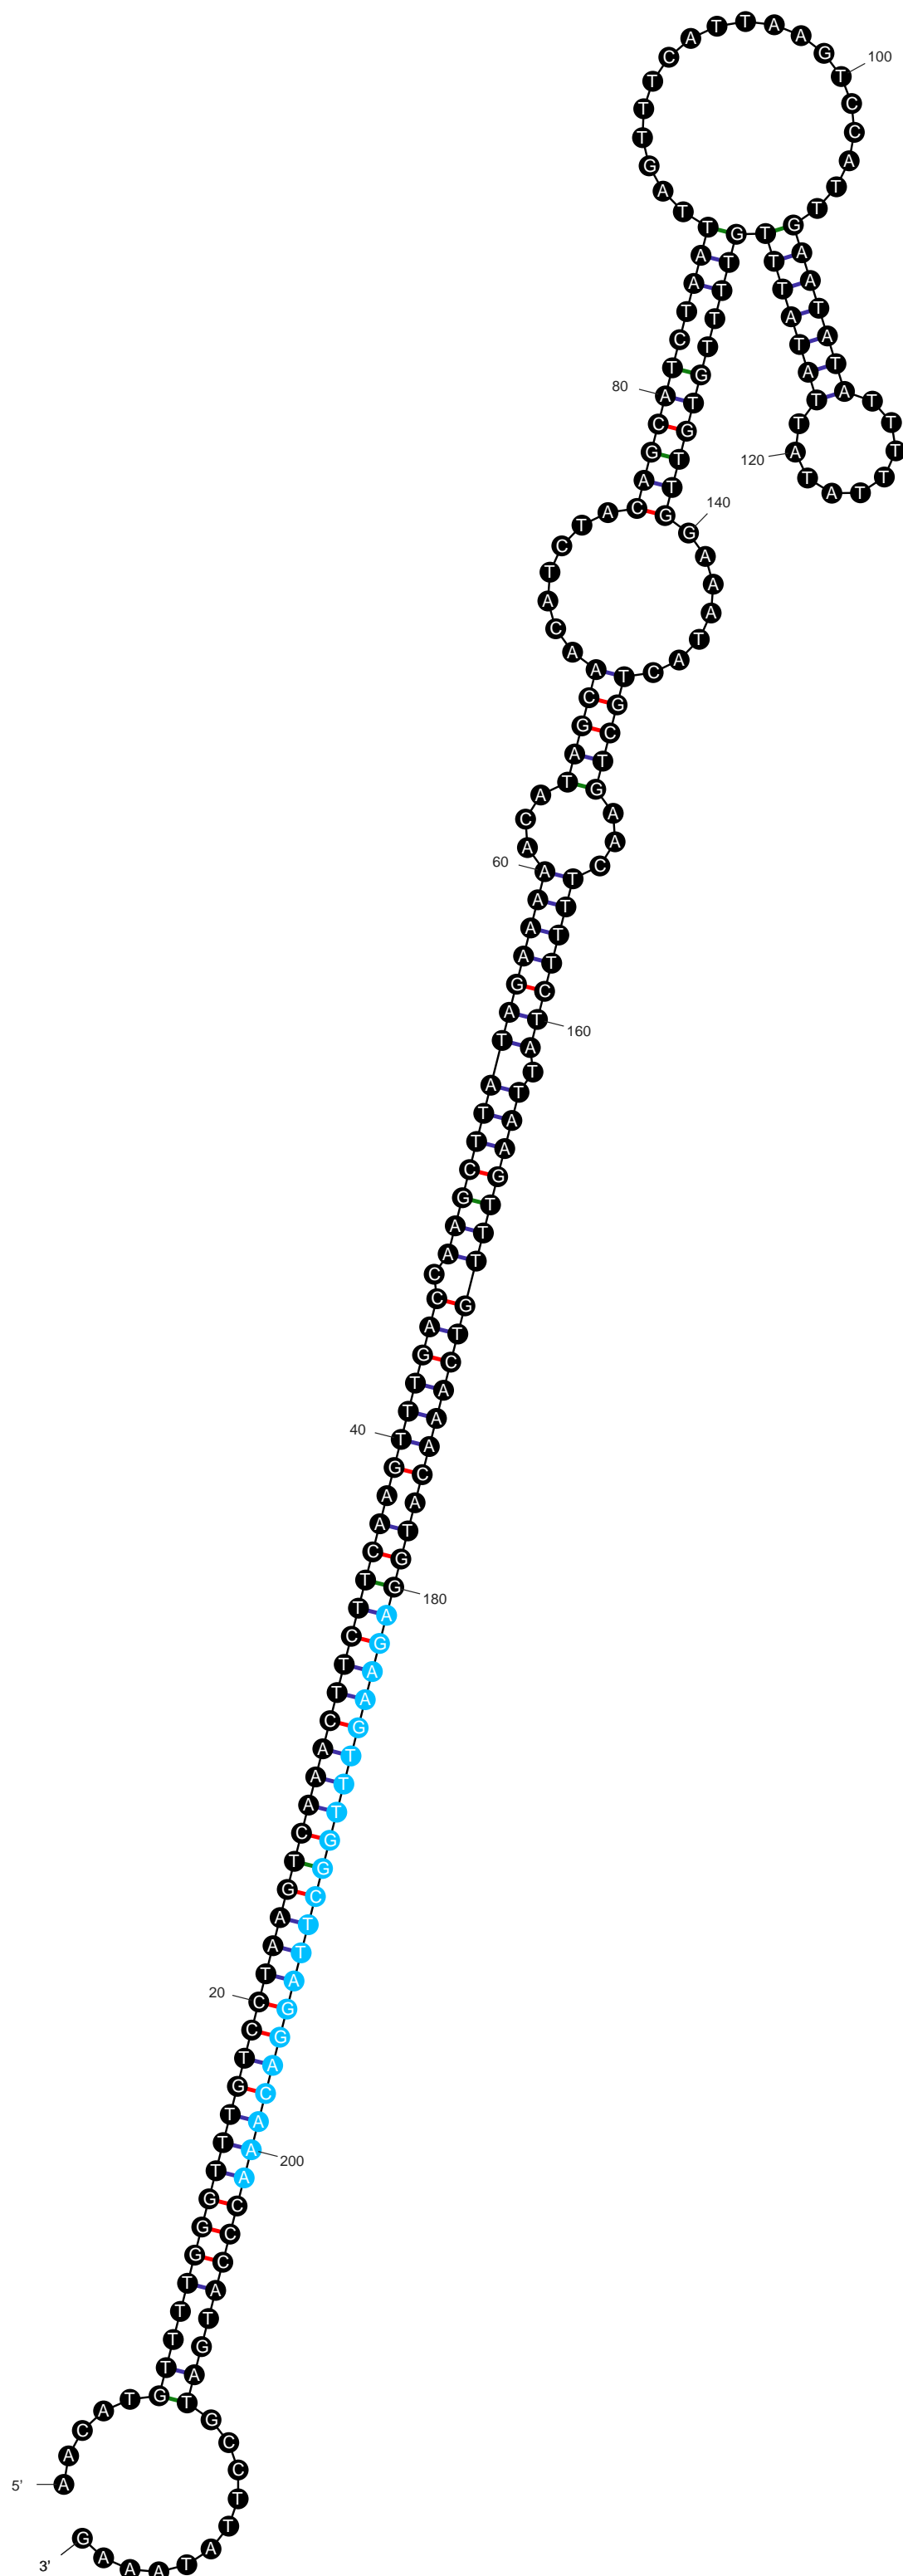

$dG = -81.80$  osa-cand008

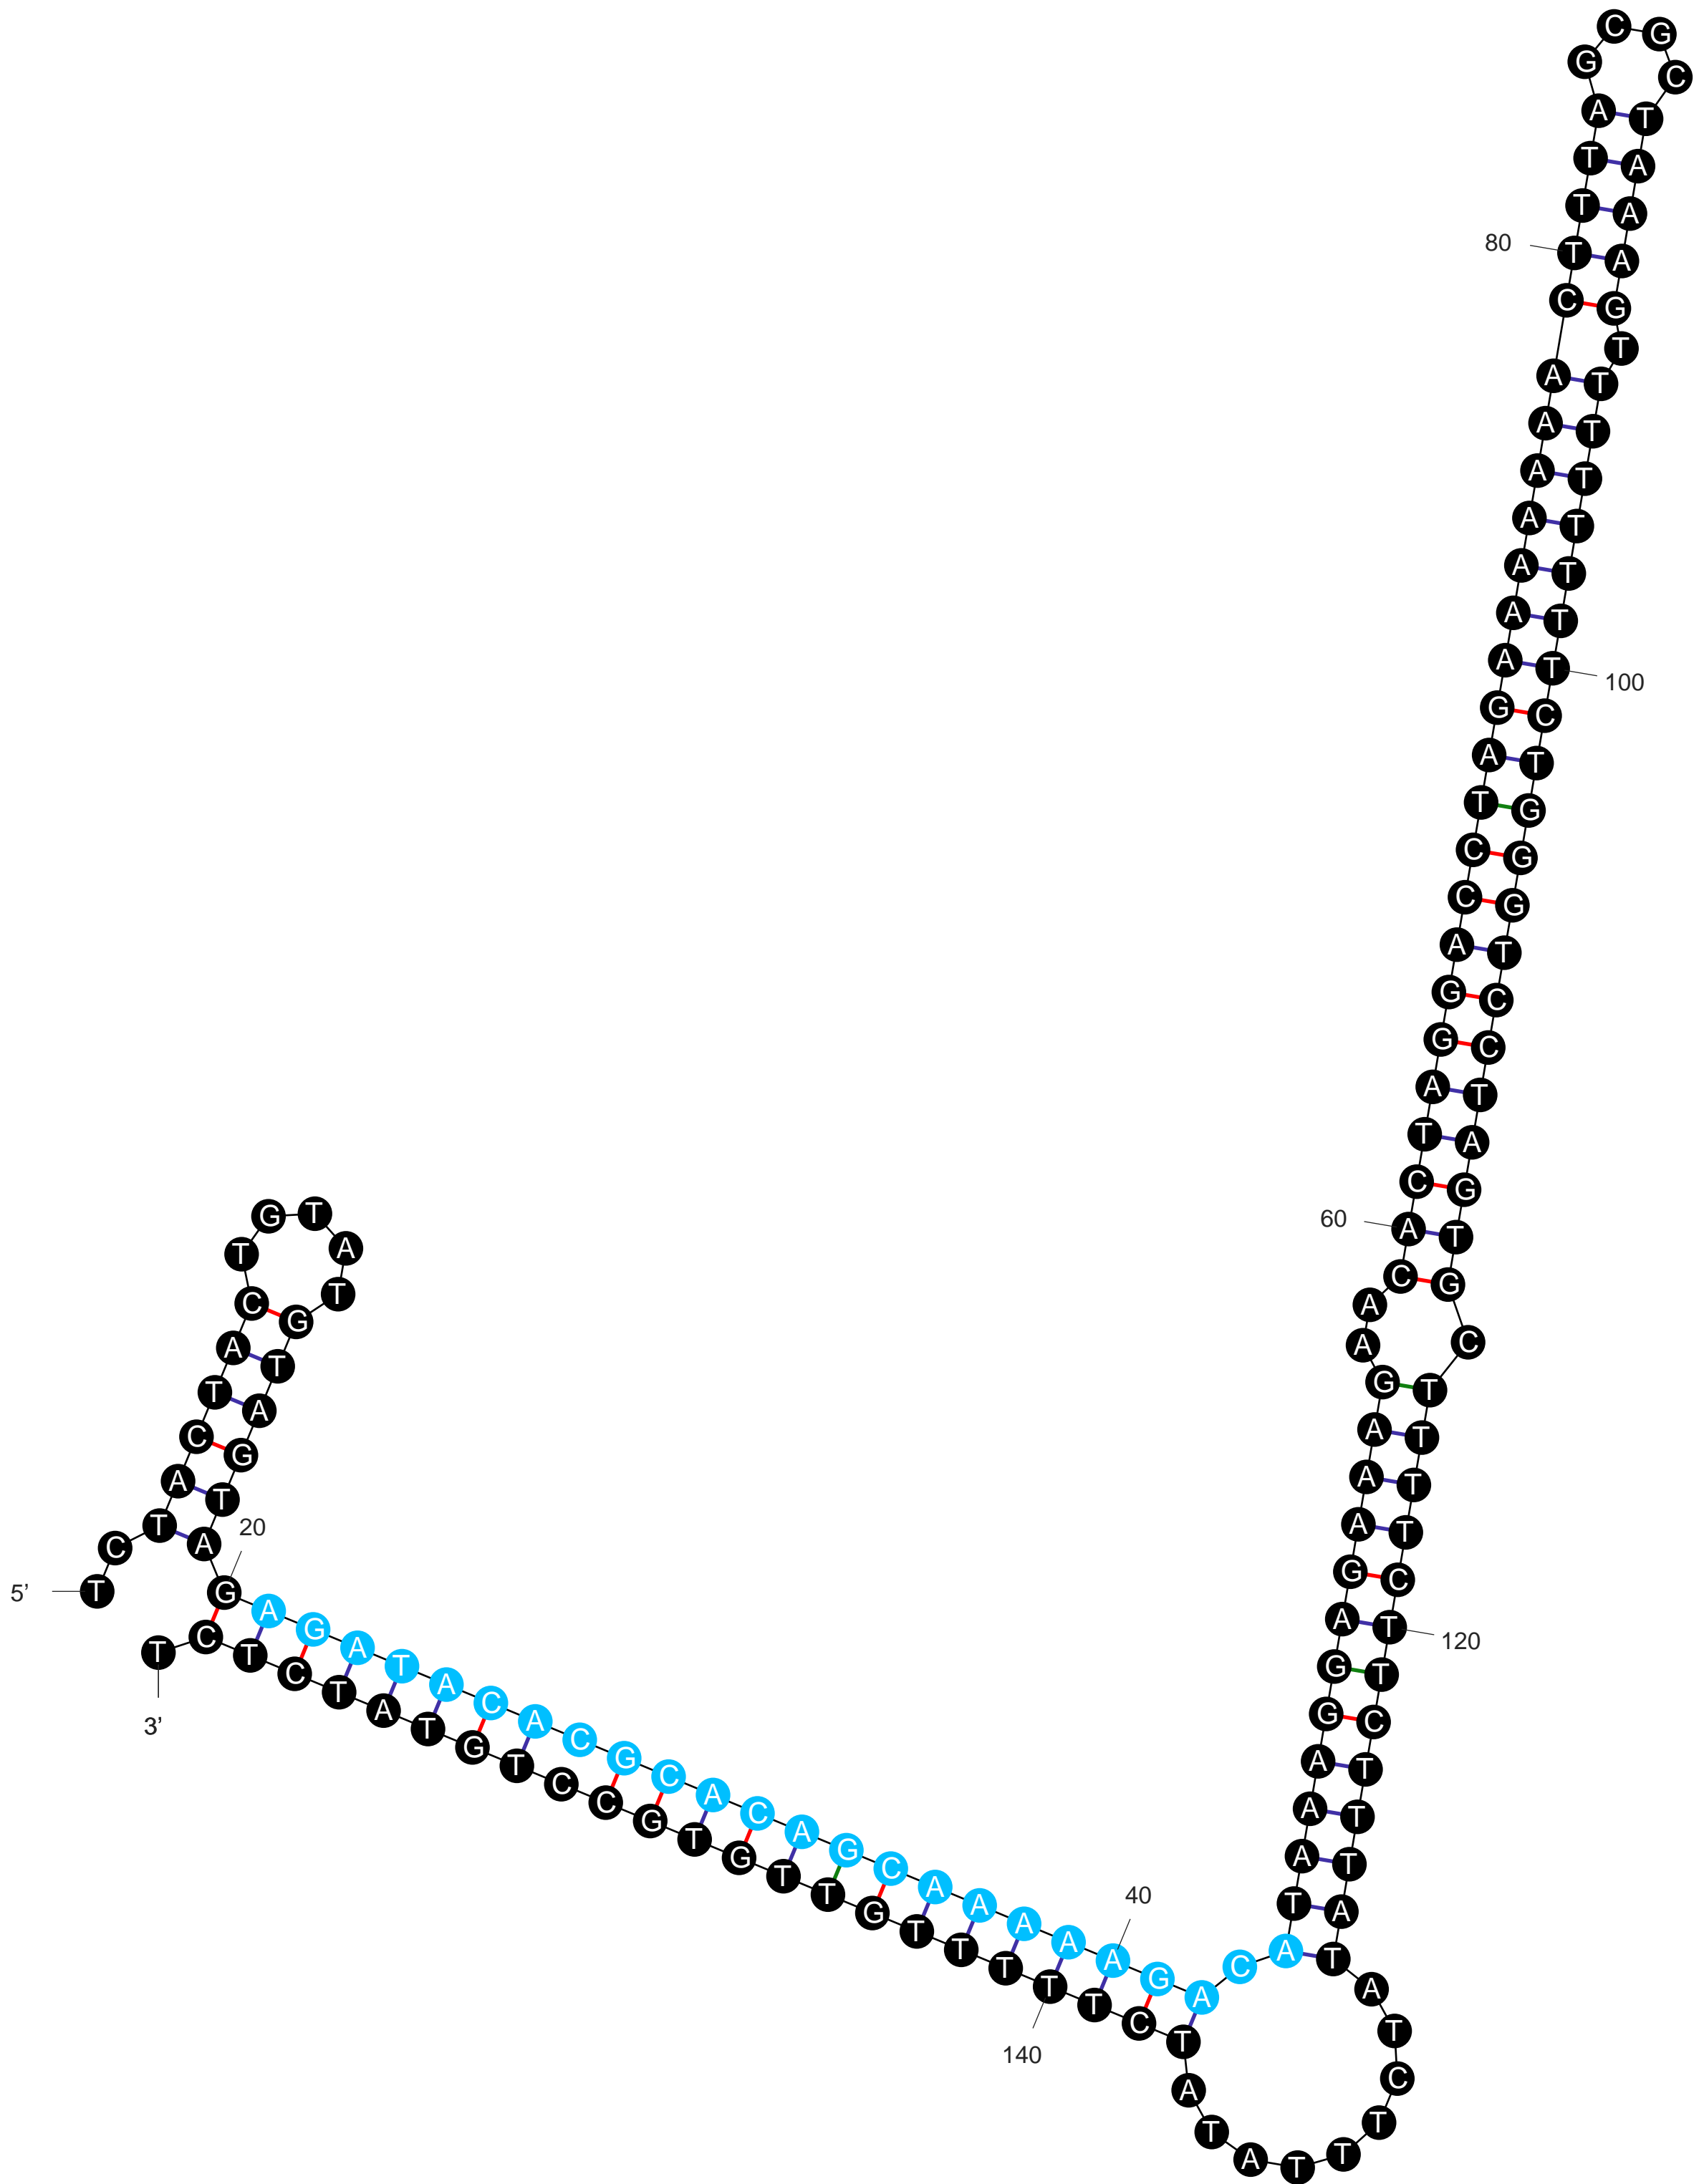

$dG = -81.10$  osa-cand009

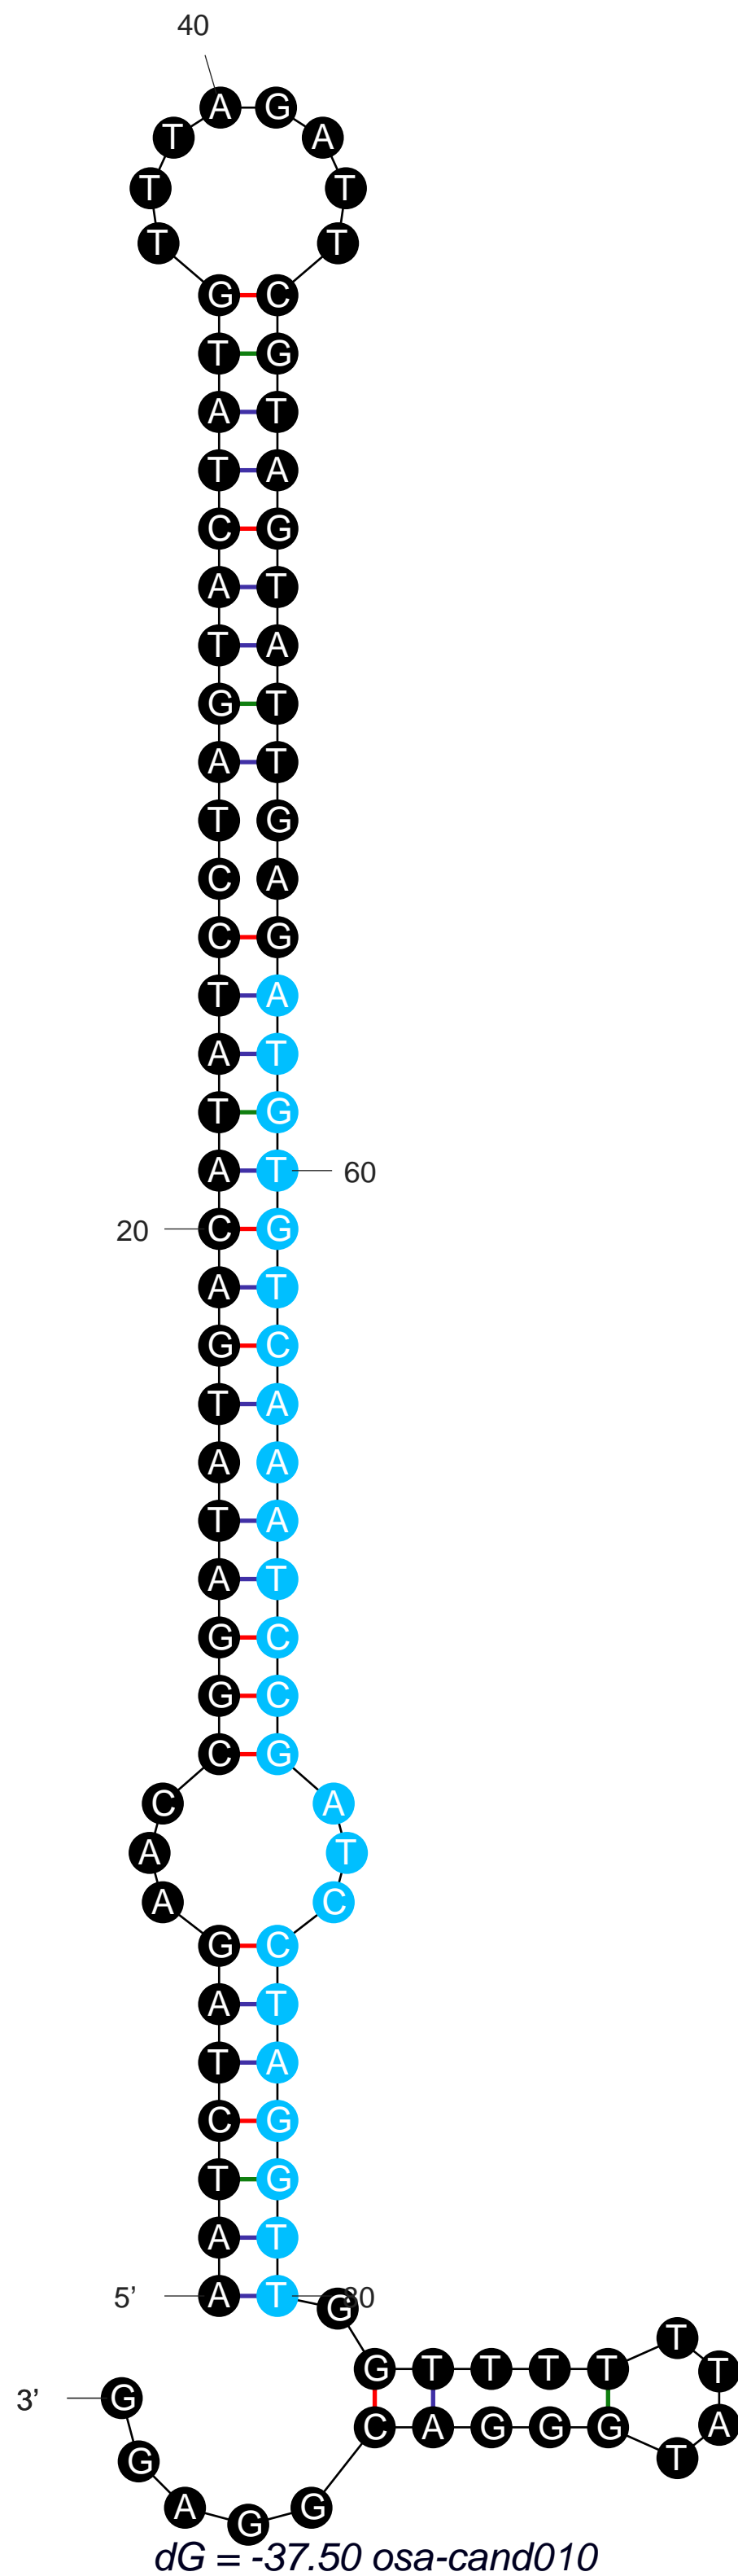

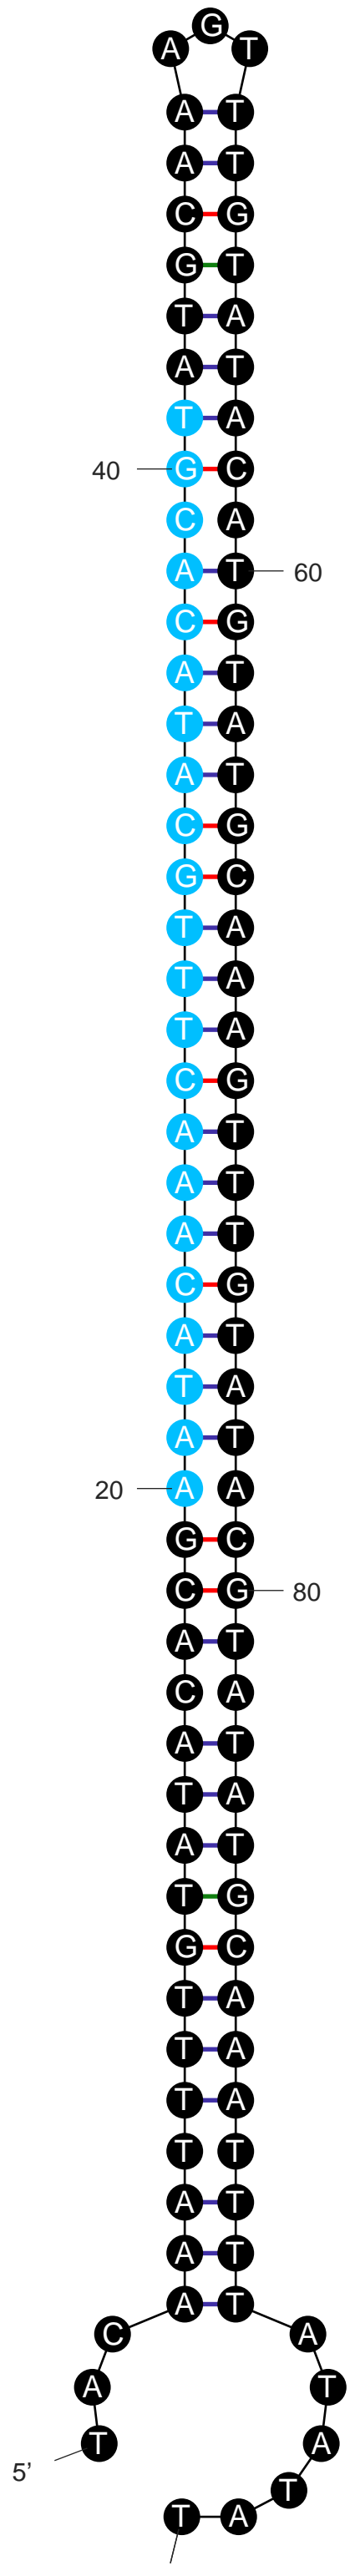

$dG = -45.20$  osa-cand011

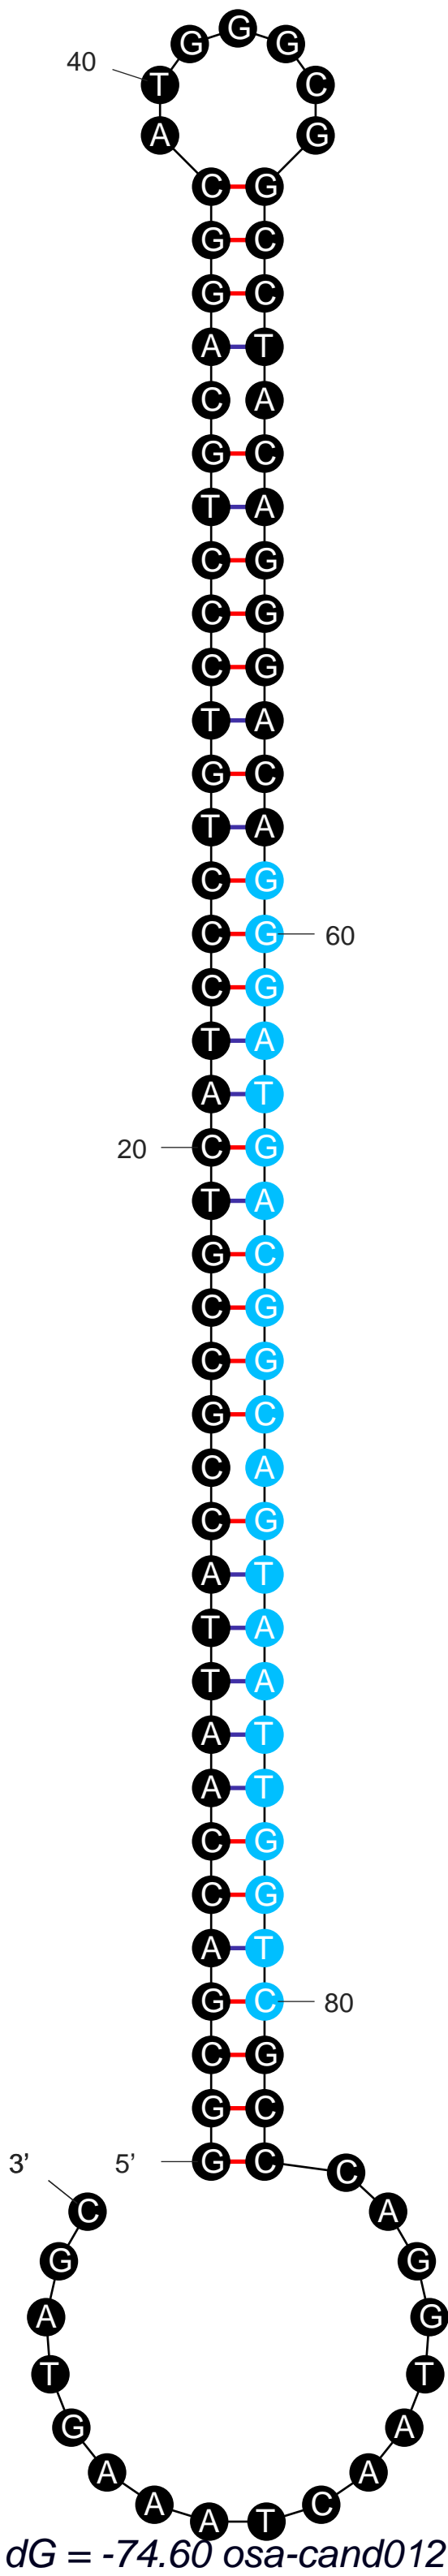

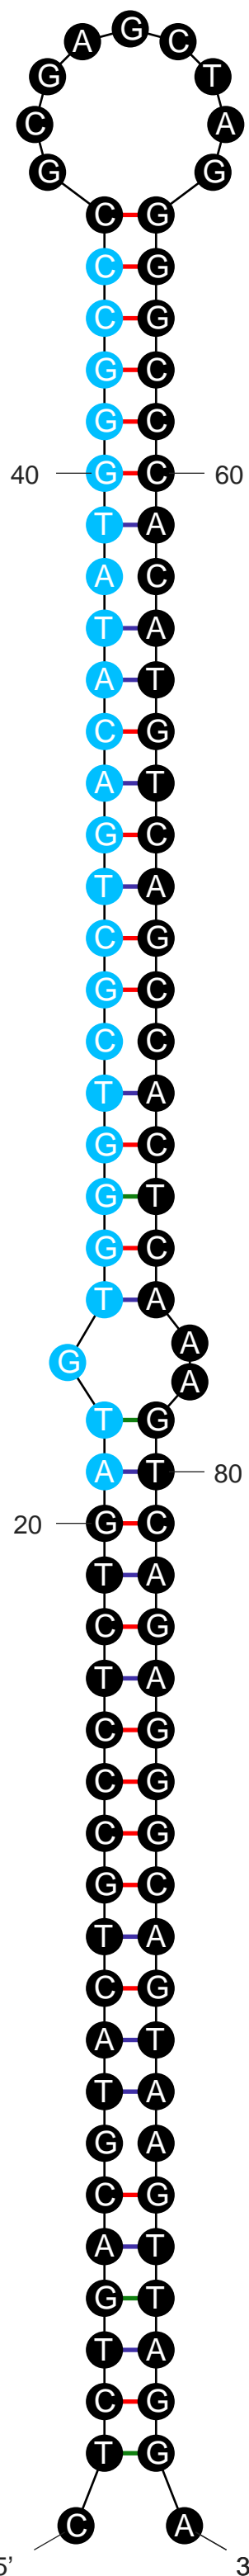

$dG = -68.90$  osa-cand013

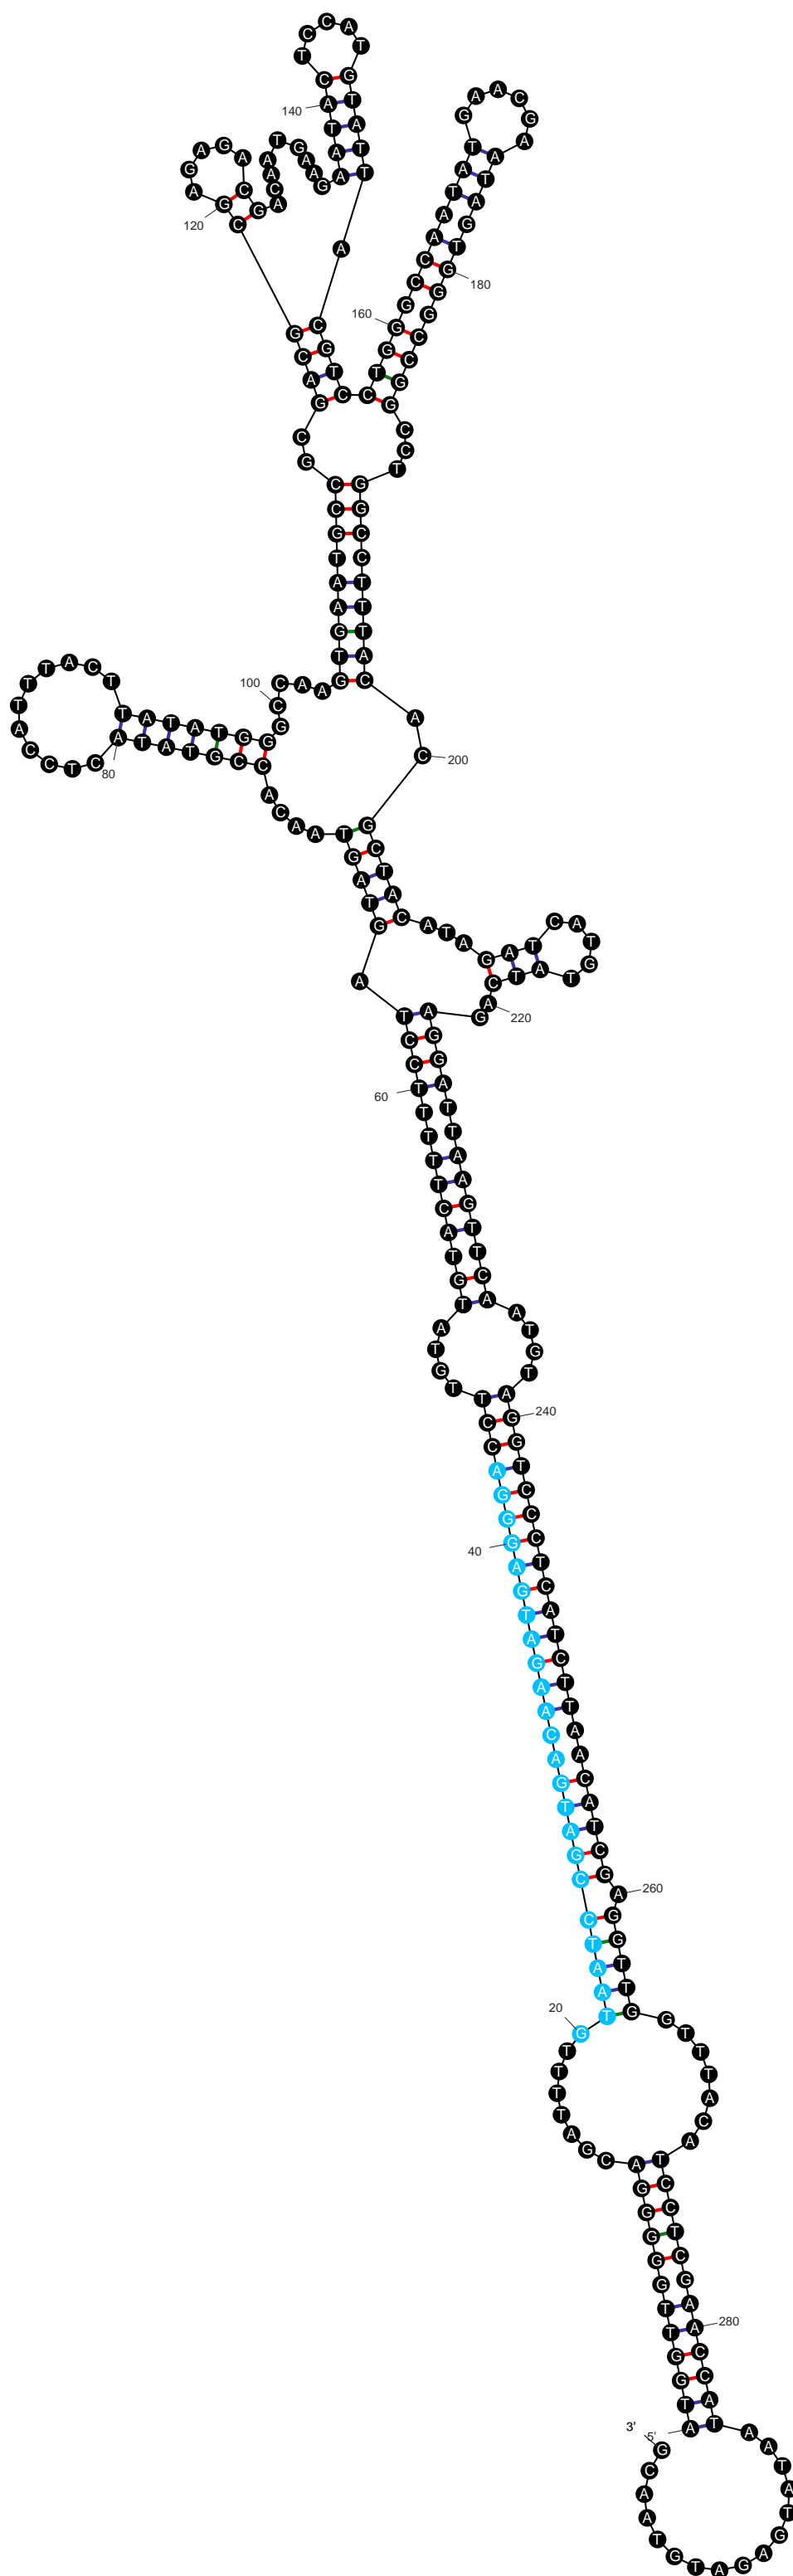

$dG = -96.80$  osa-cand014

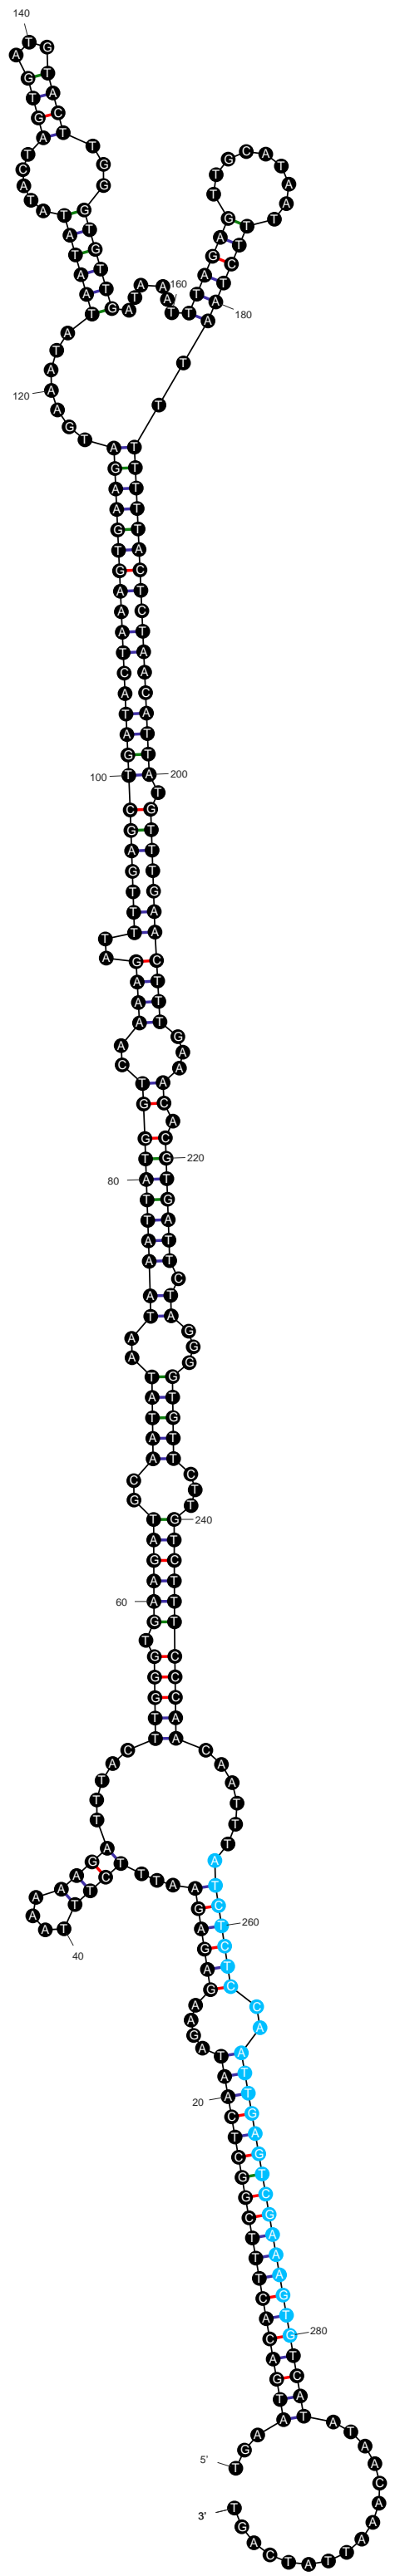

$dG = -73.20$  osa-cand015a



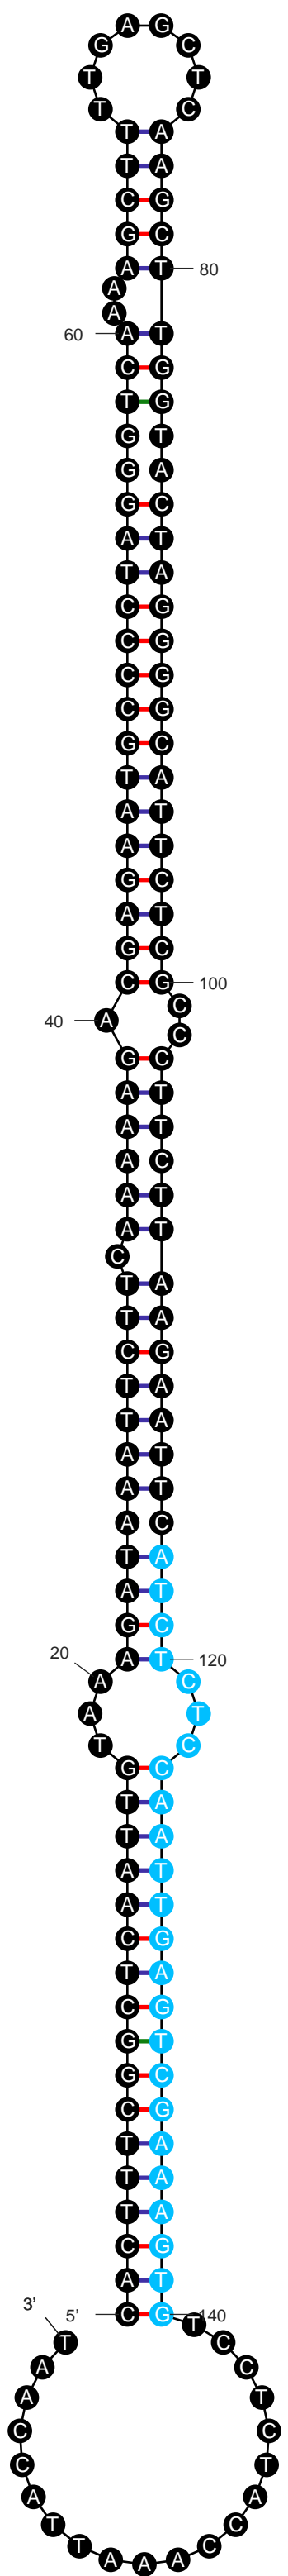

$dG = -72.20$  osa-cand015b

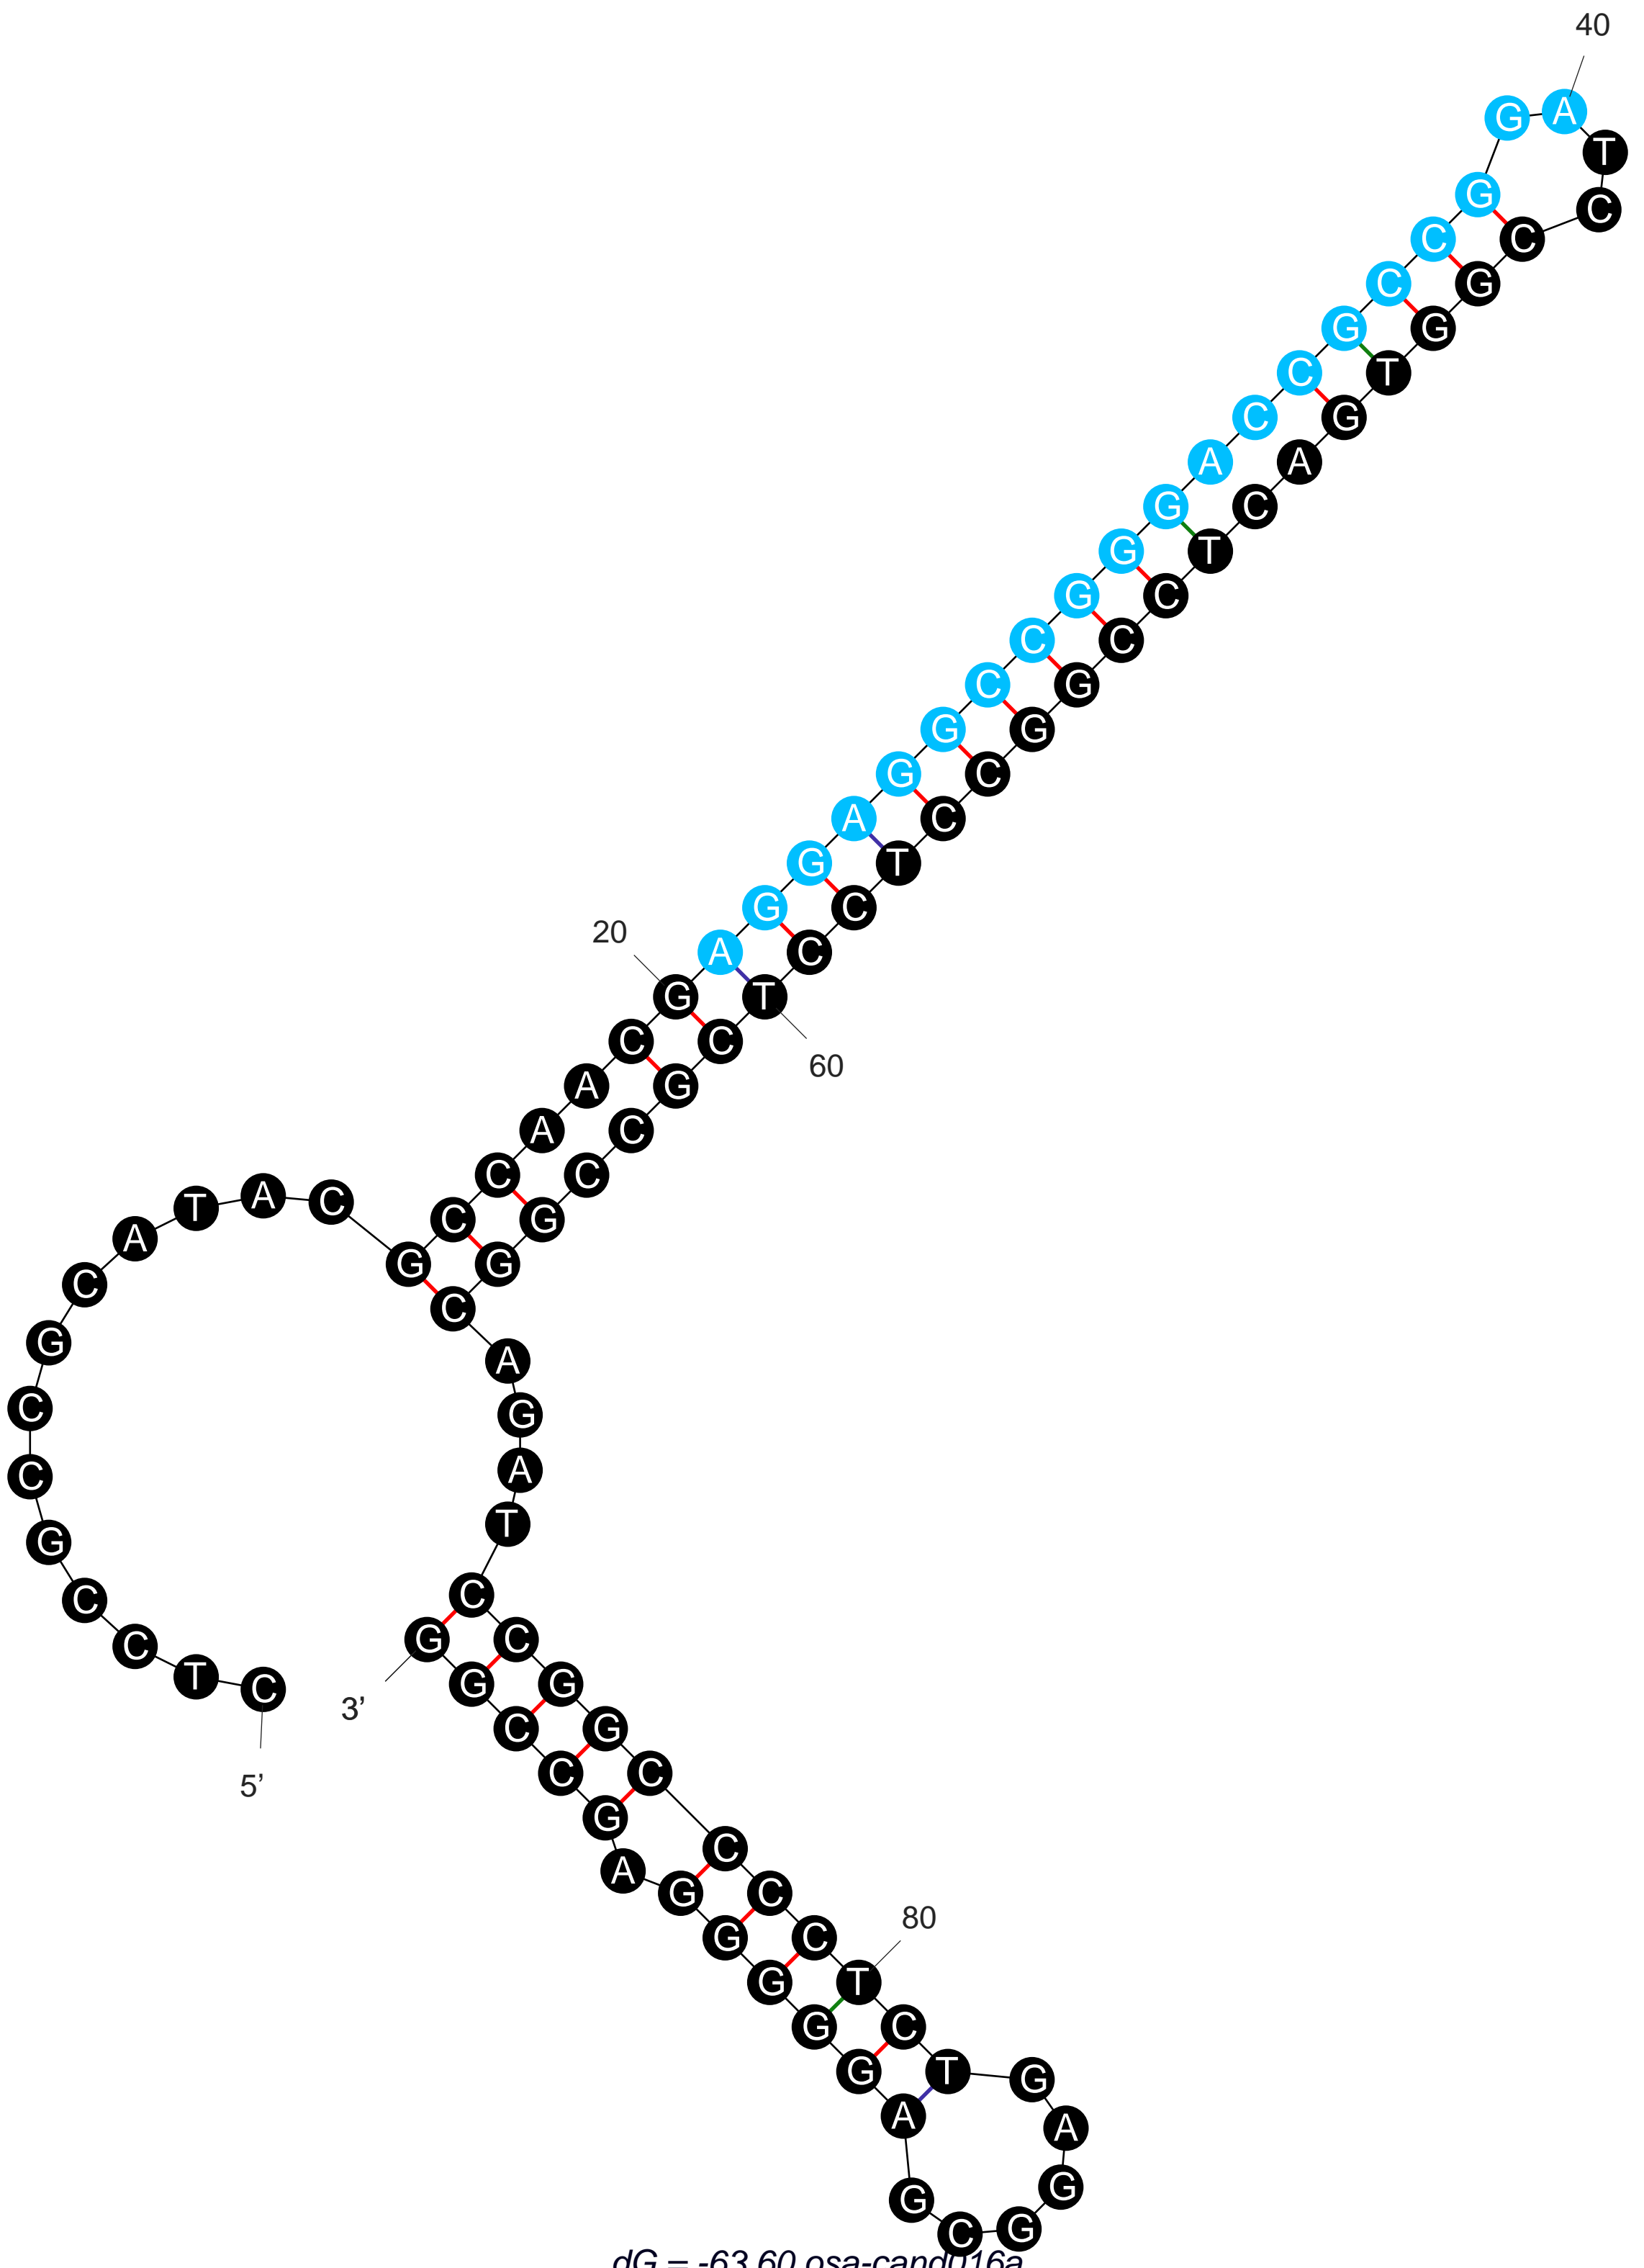

dG = -63.60 osa-cand016a

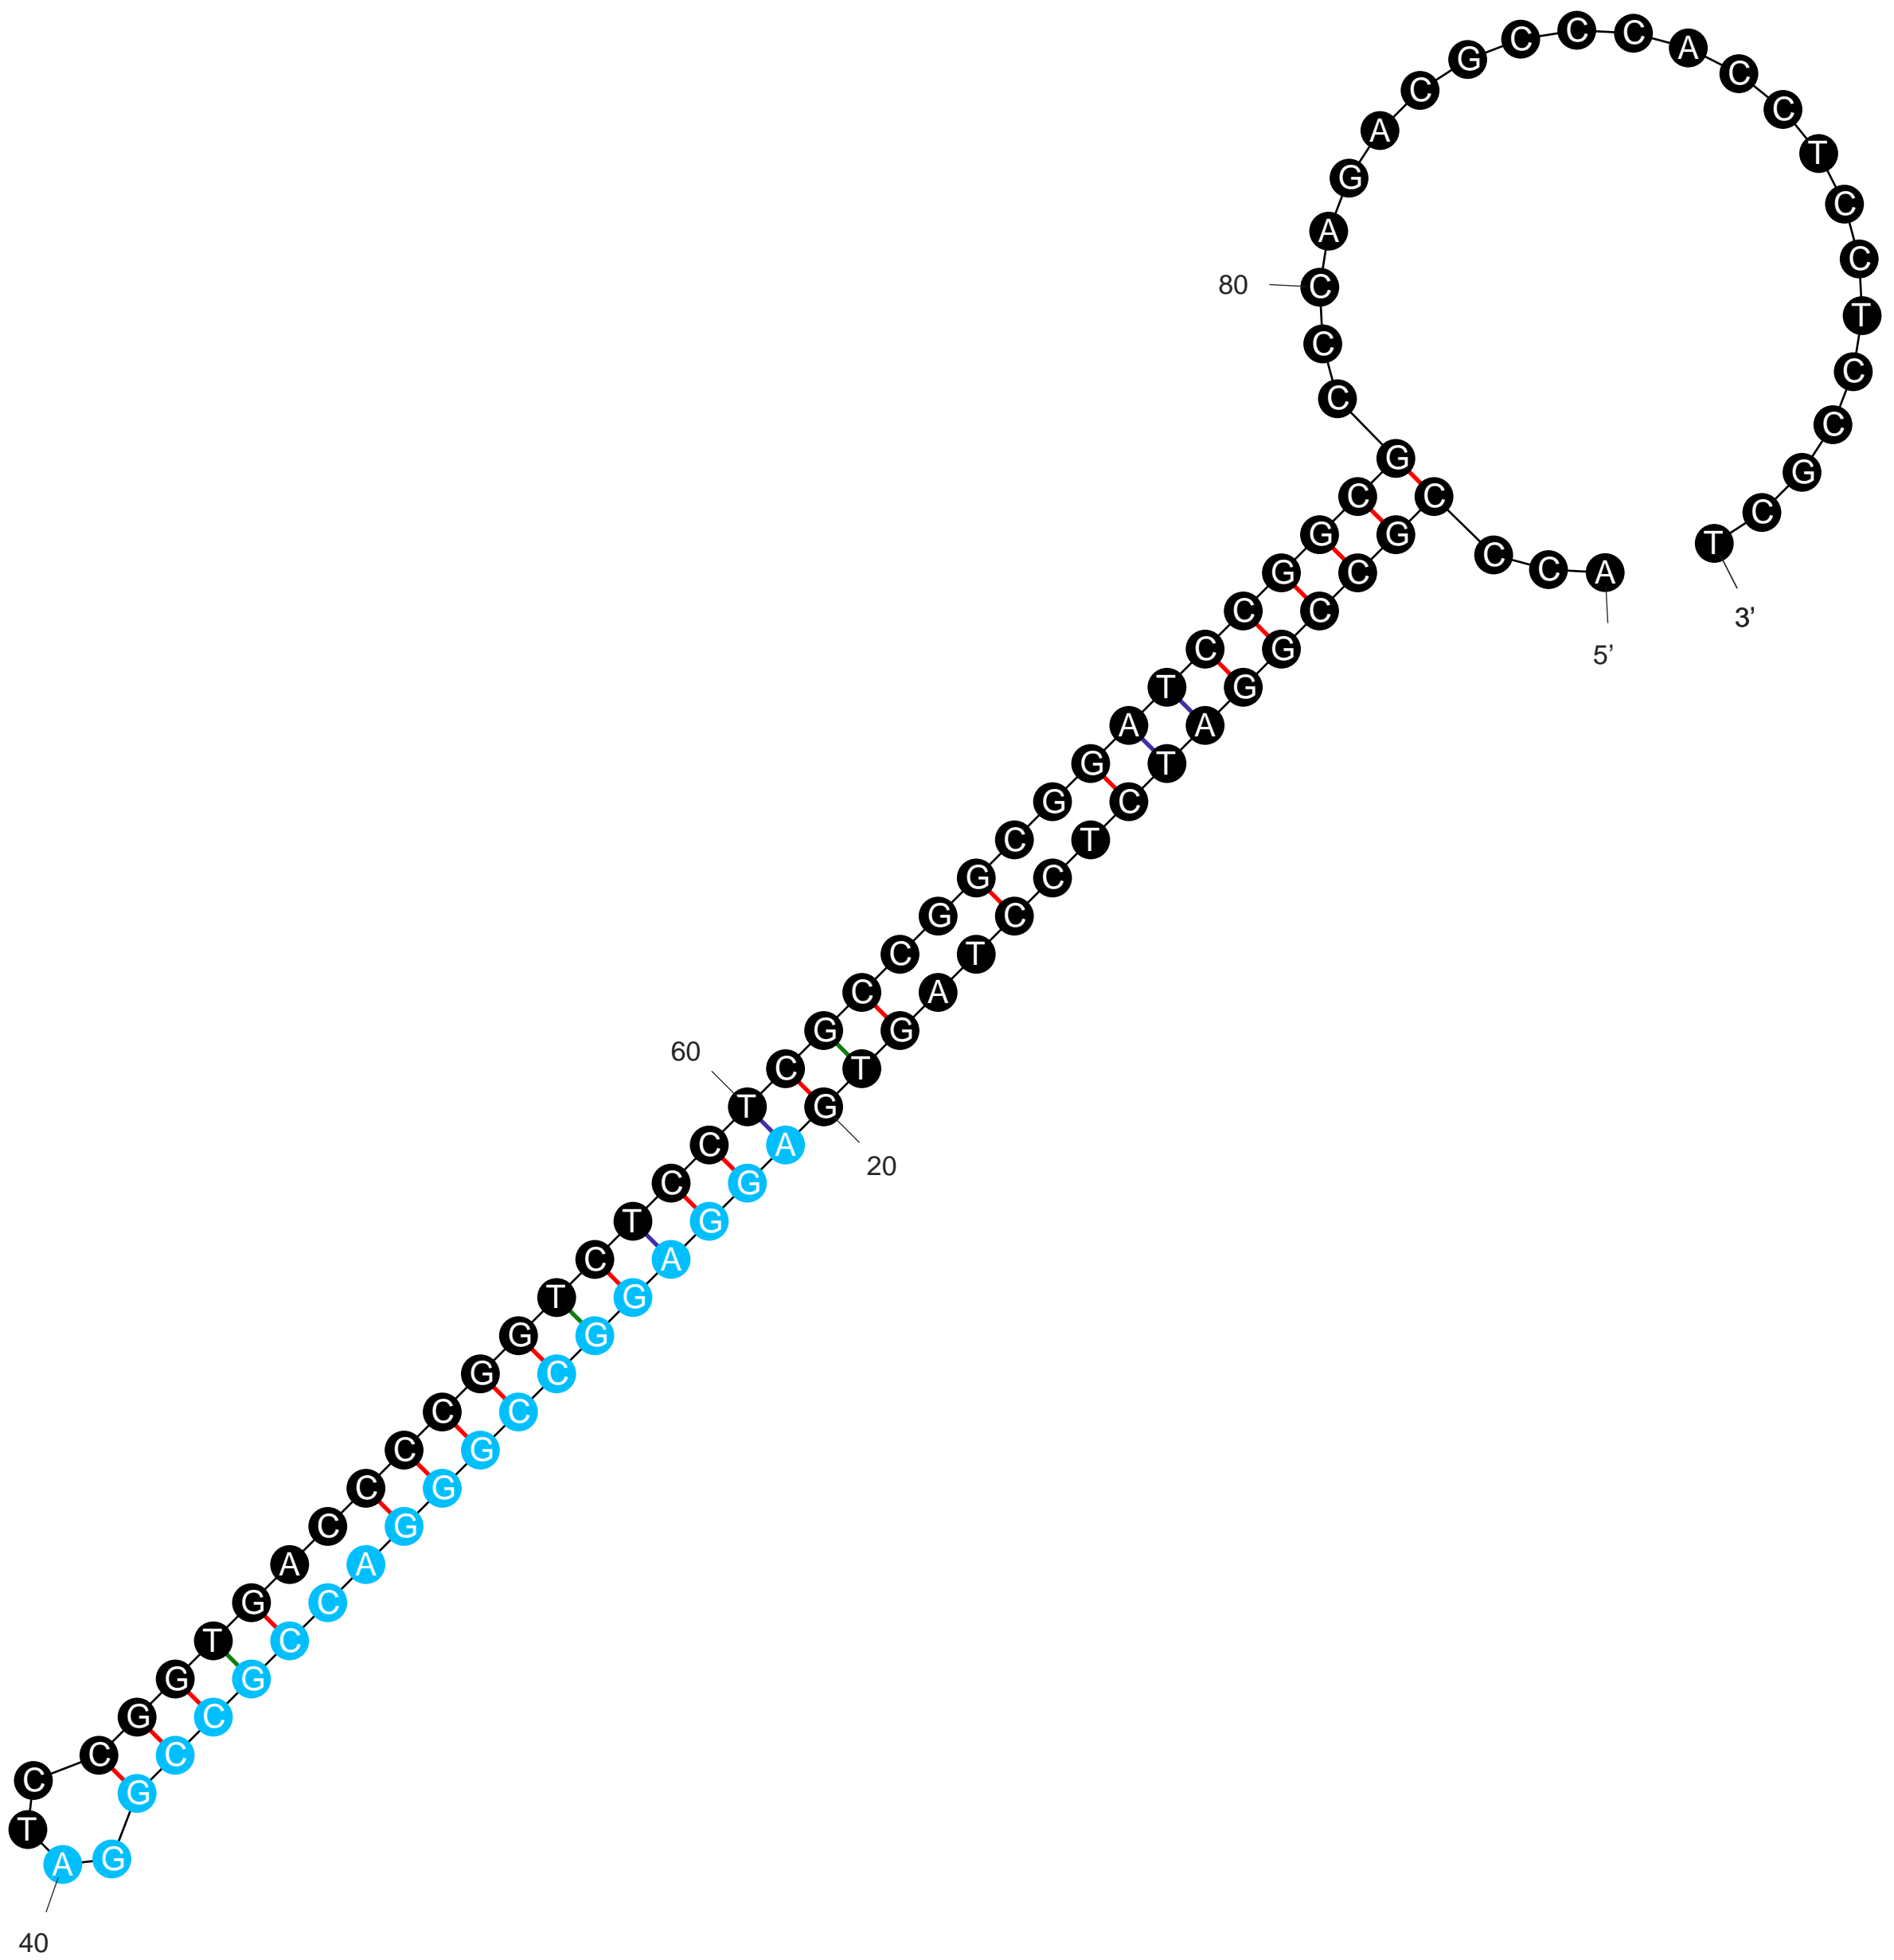

$dG = -62.00$  osa-cand016b

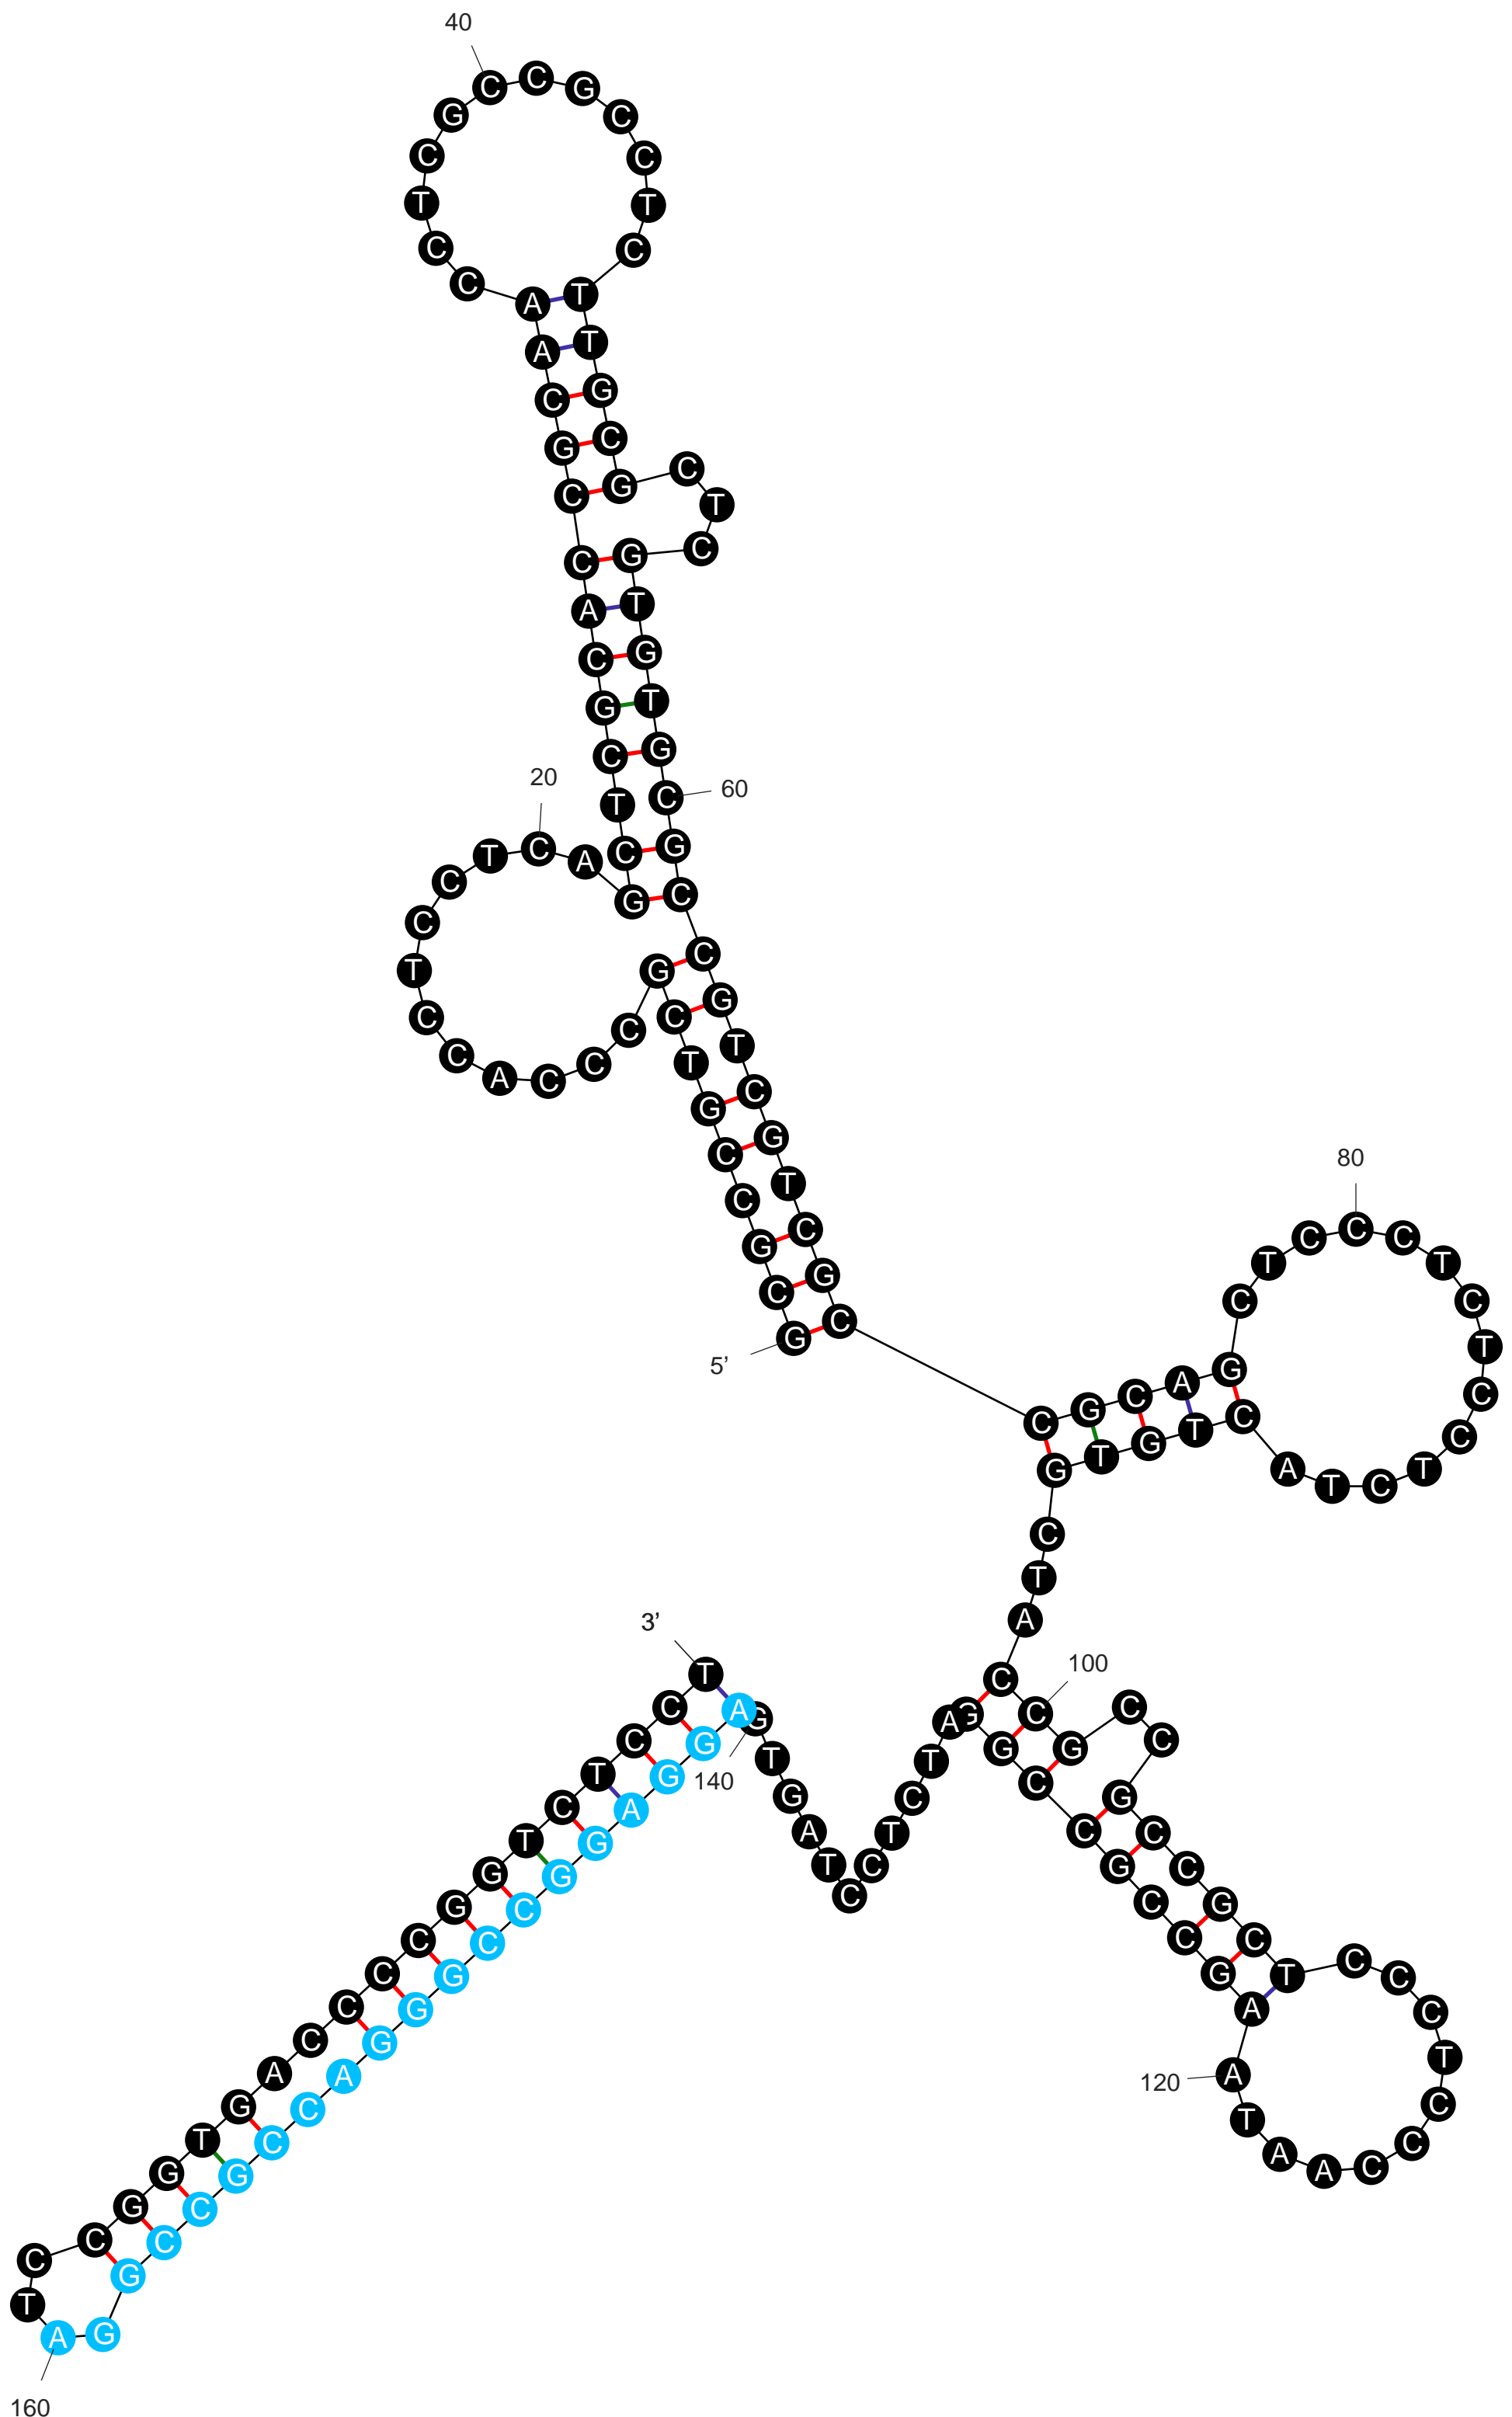

$dG = -57.40$  *osa-cand016c*

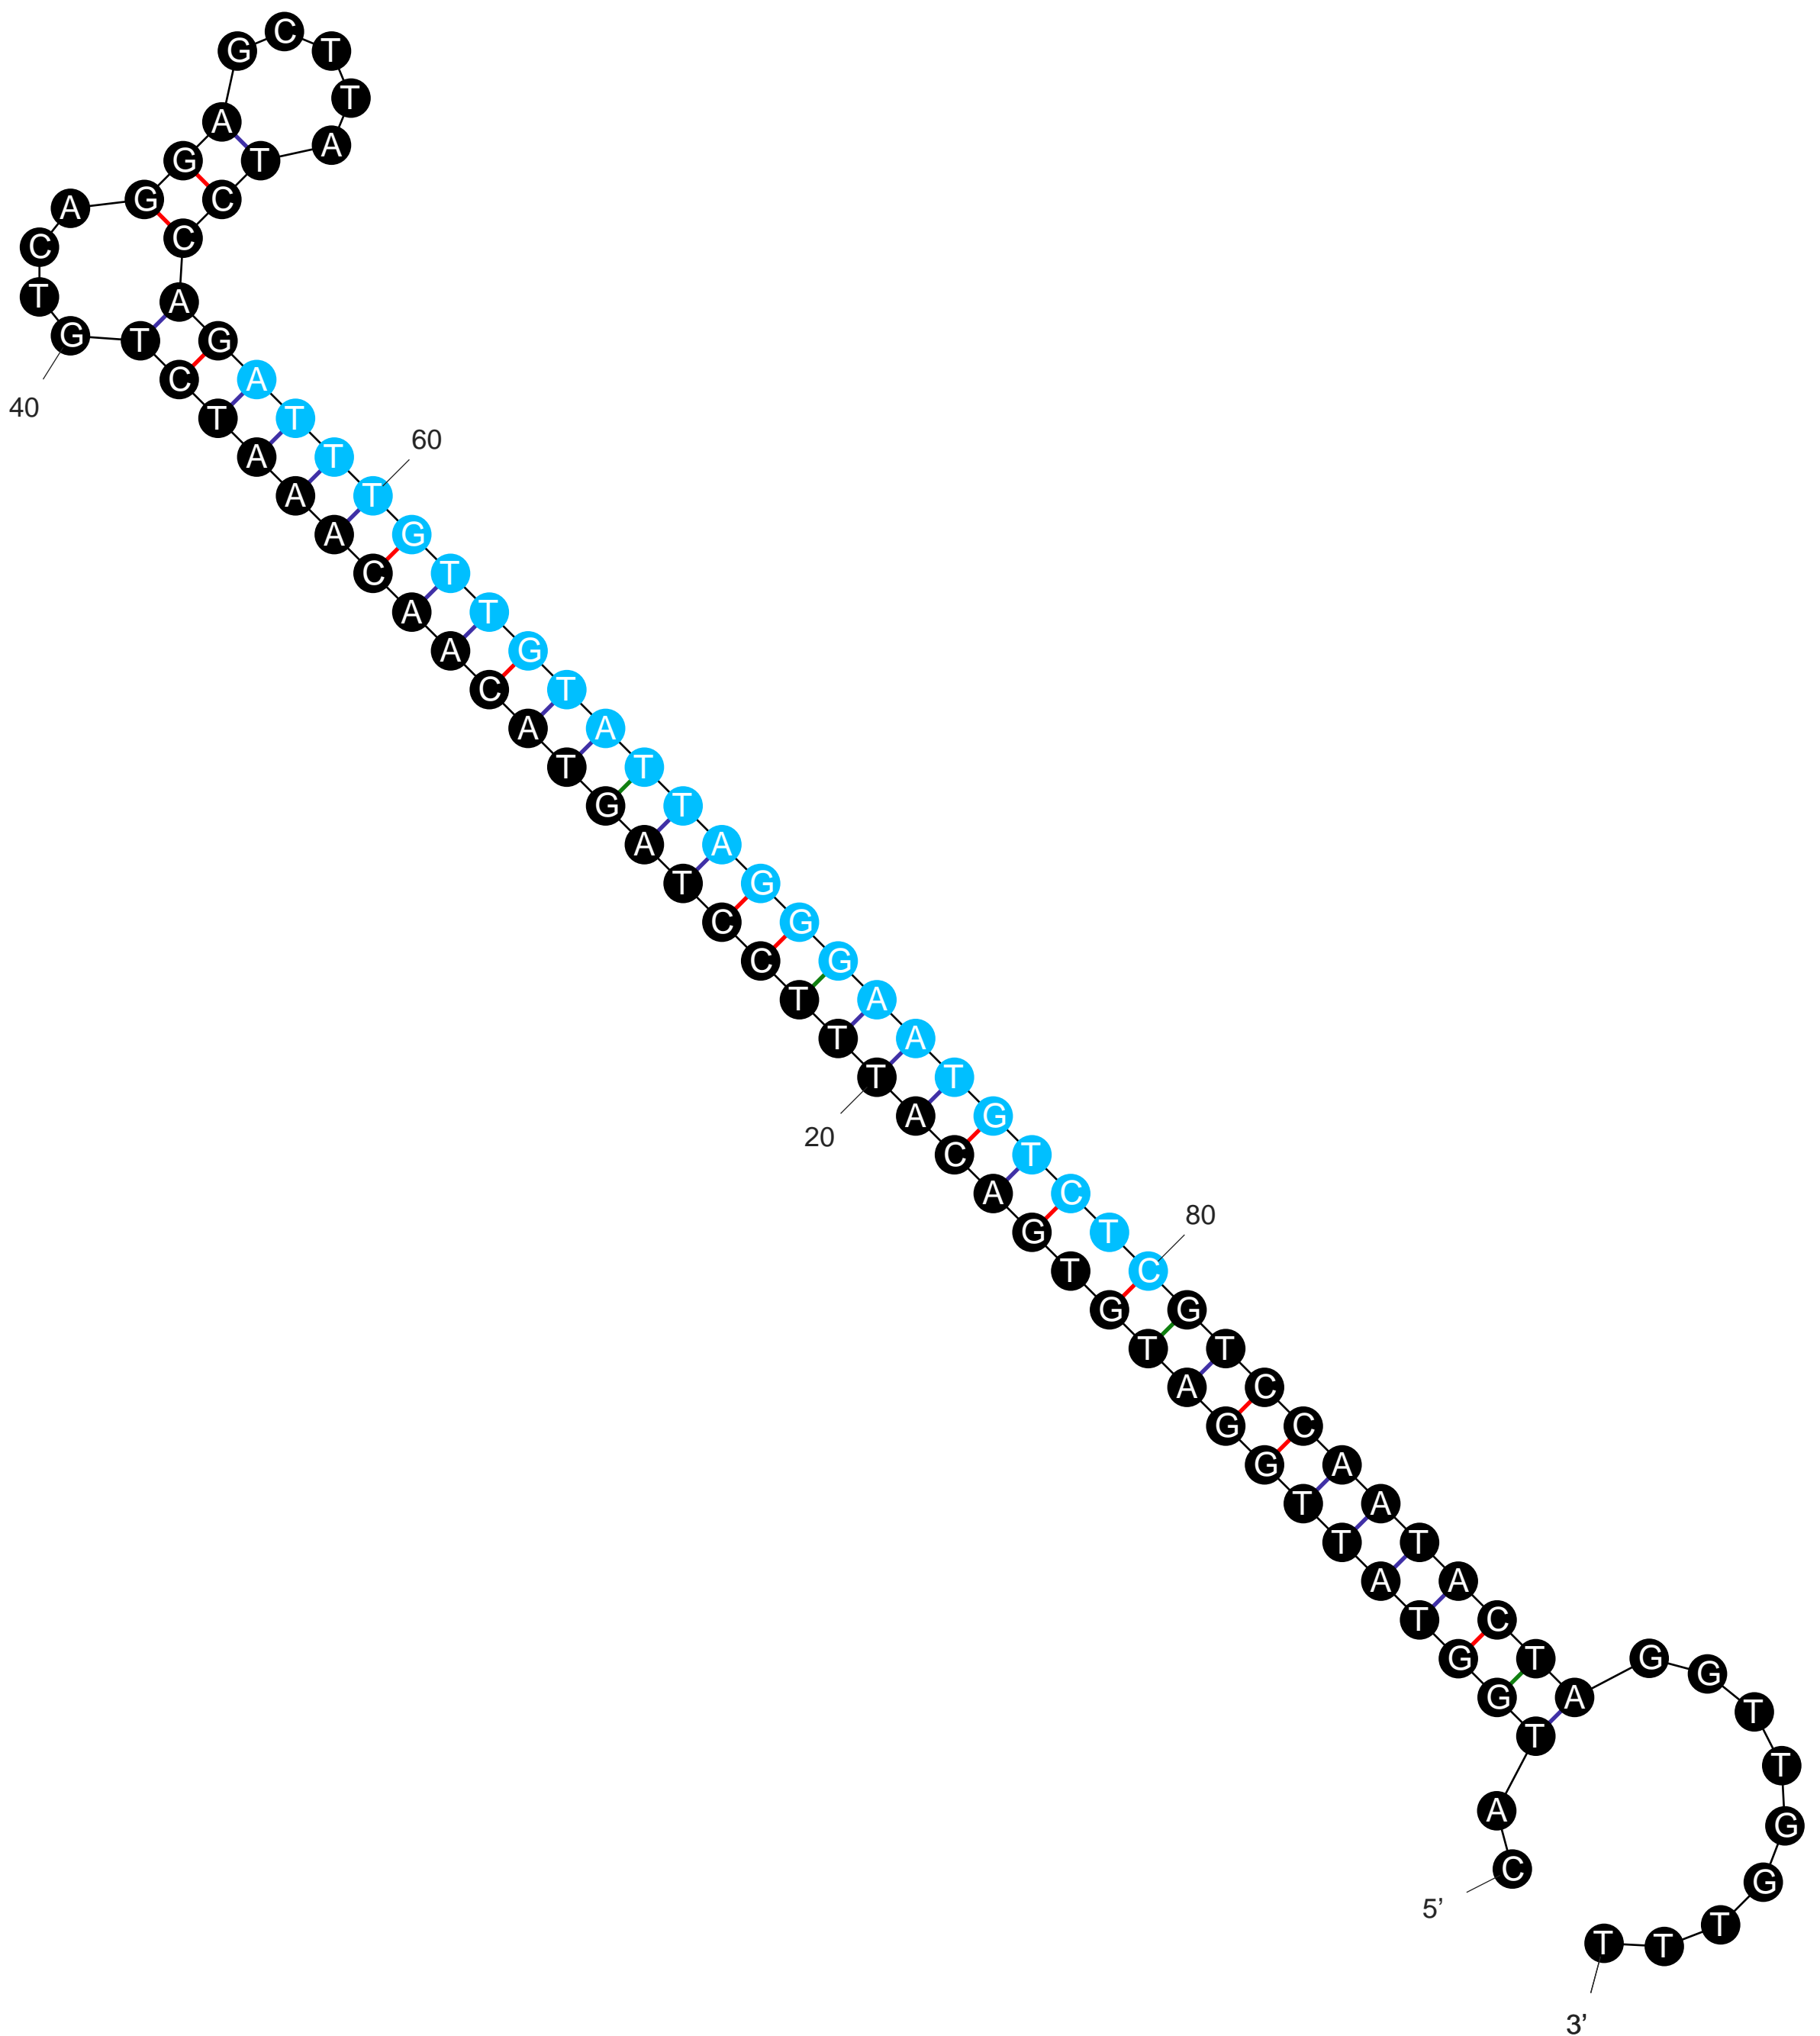

$dG = -55.30$  osa-cand017

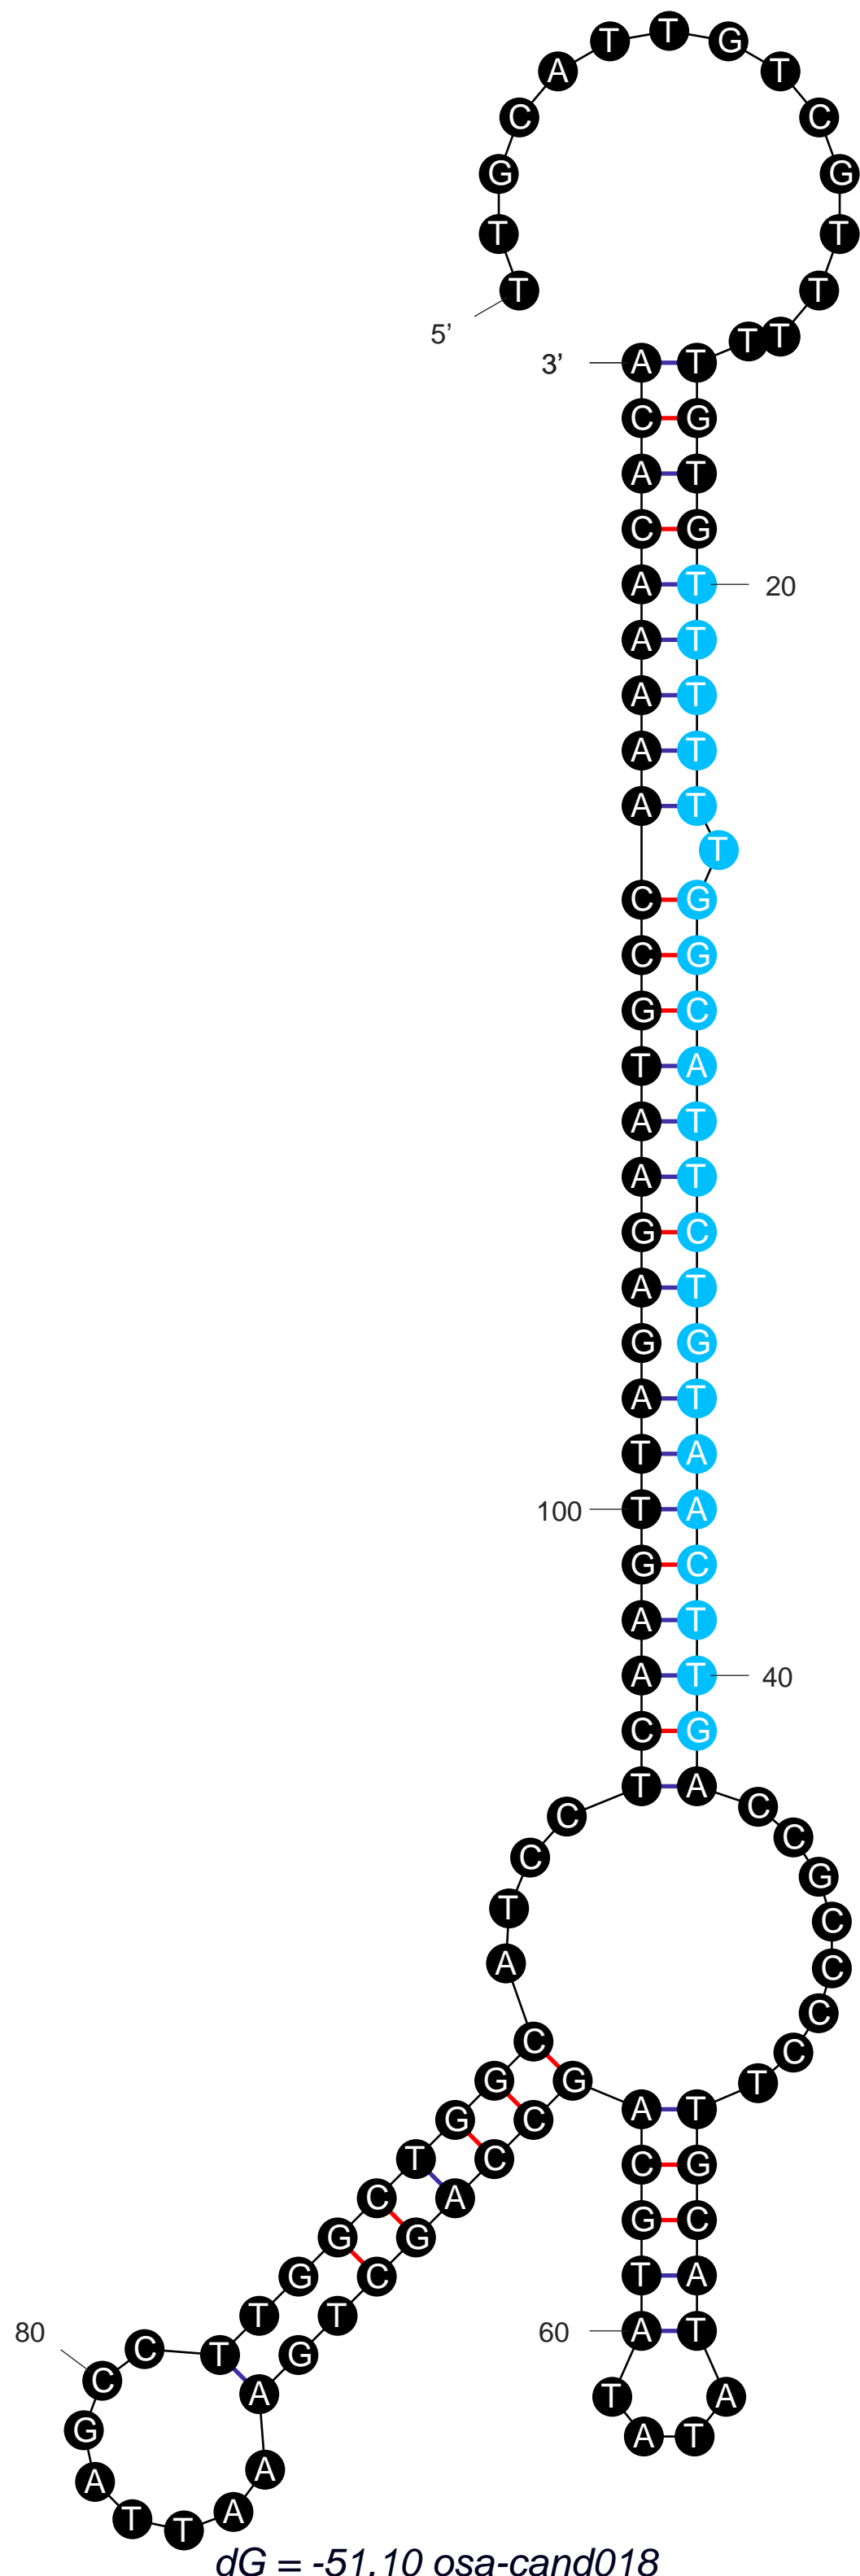

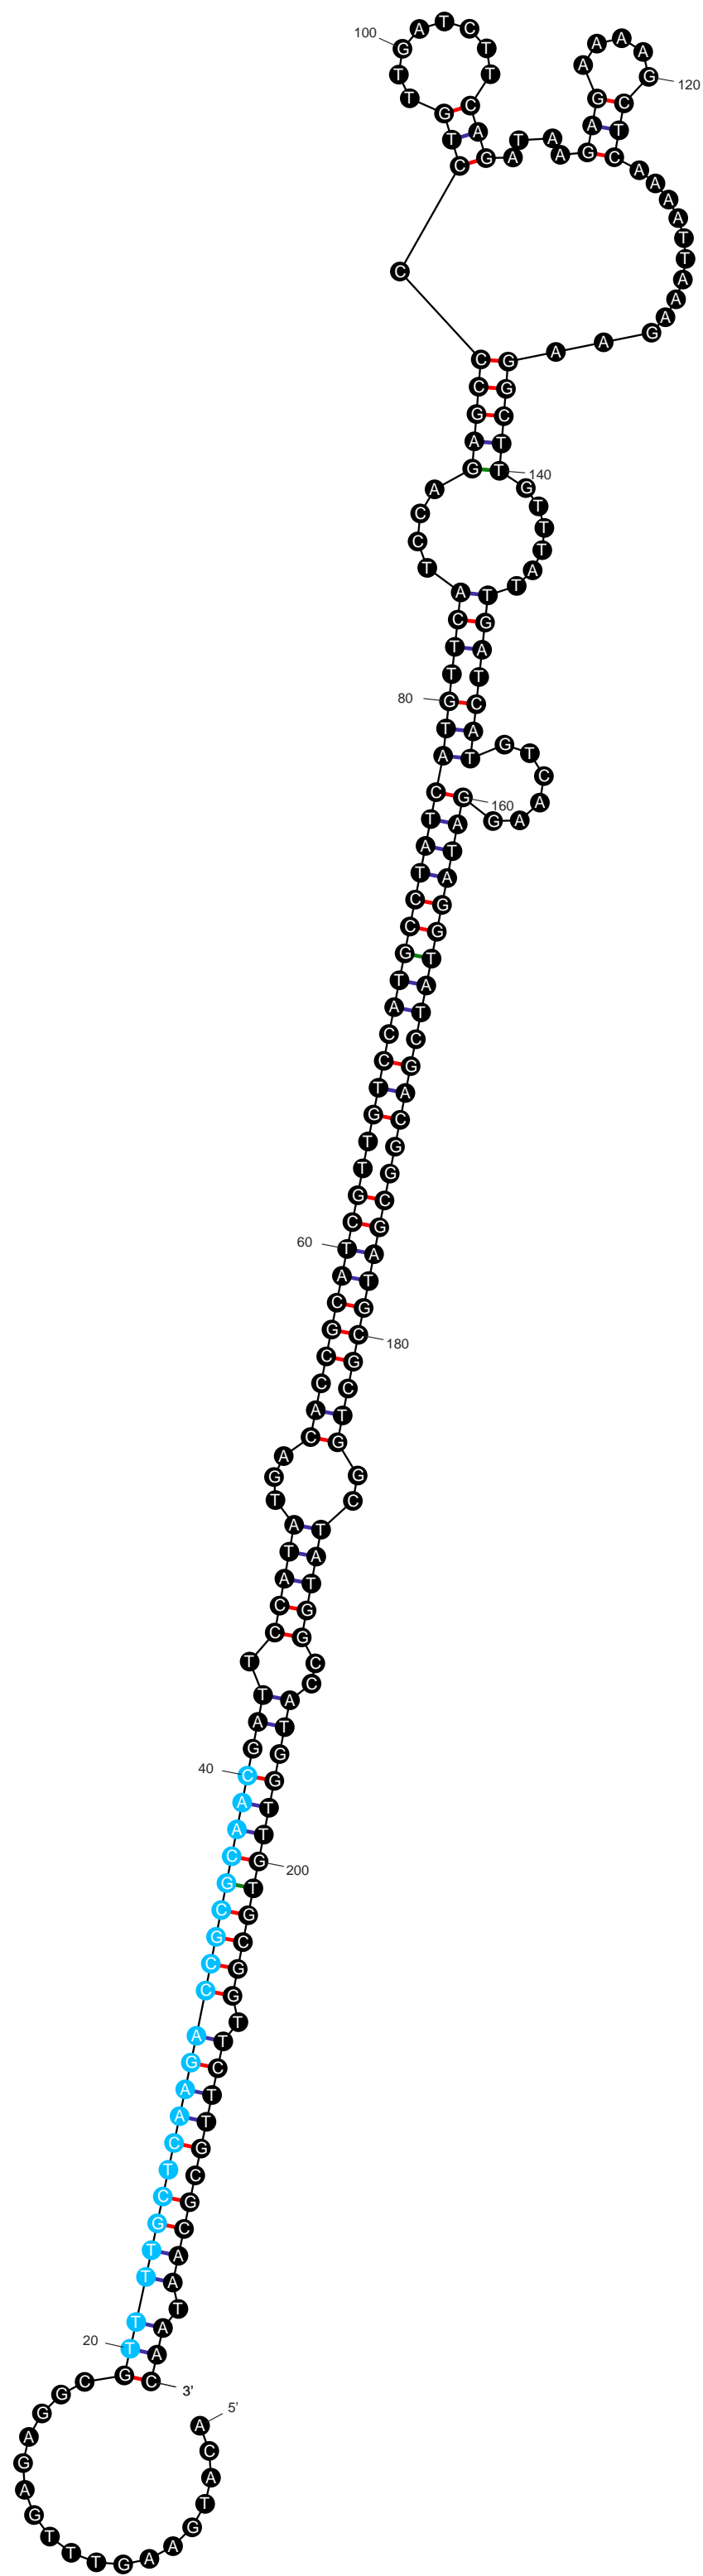

$dG = -80.40$  osa-cand019

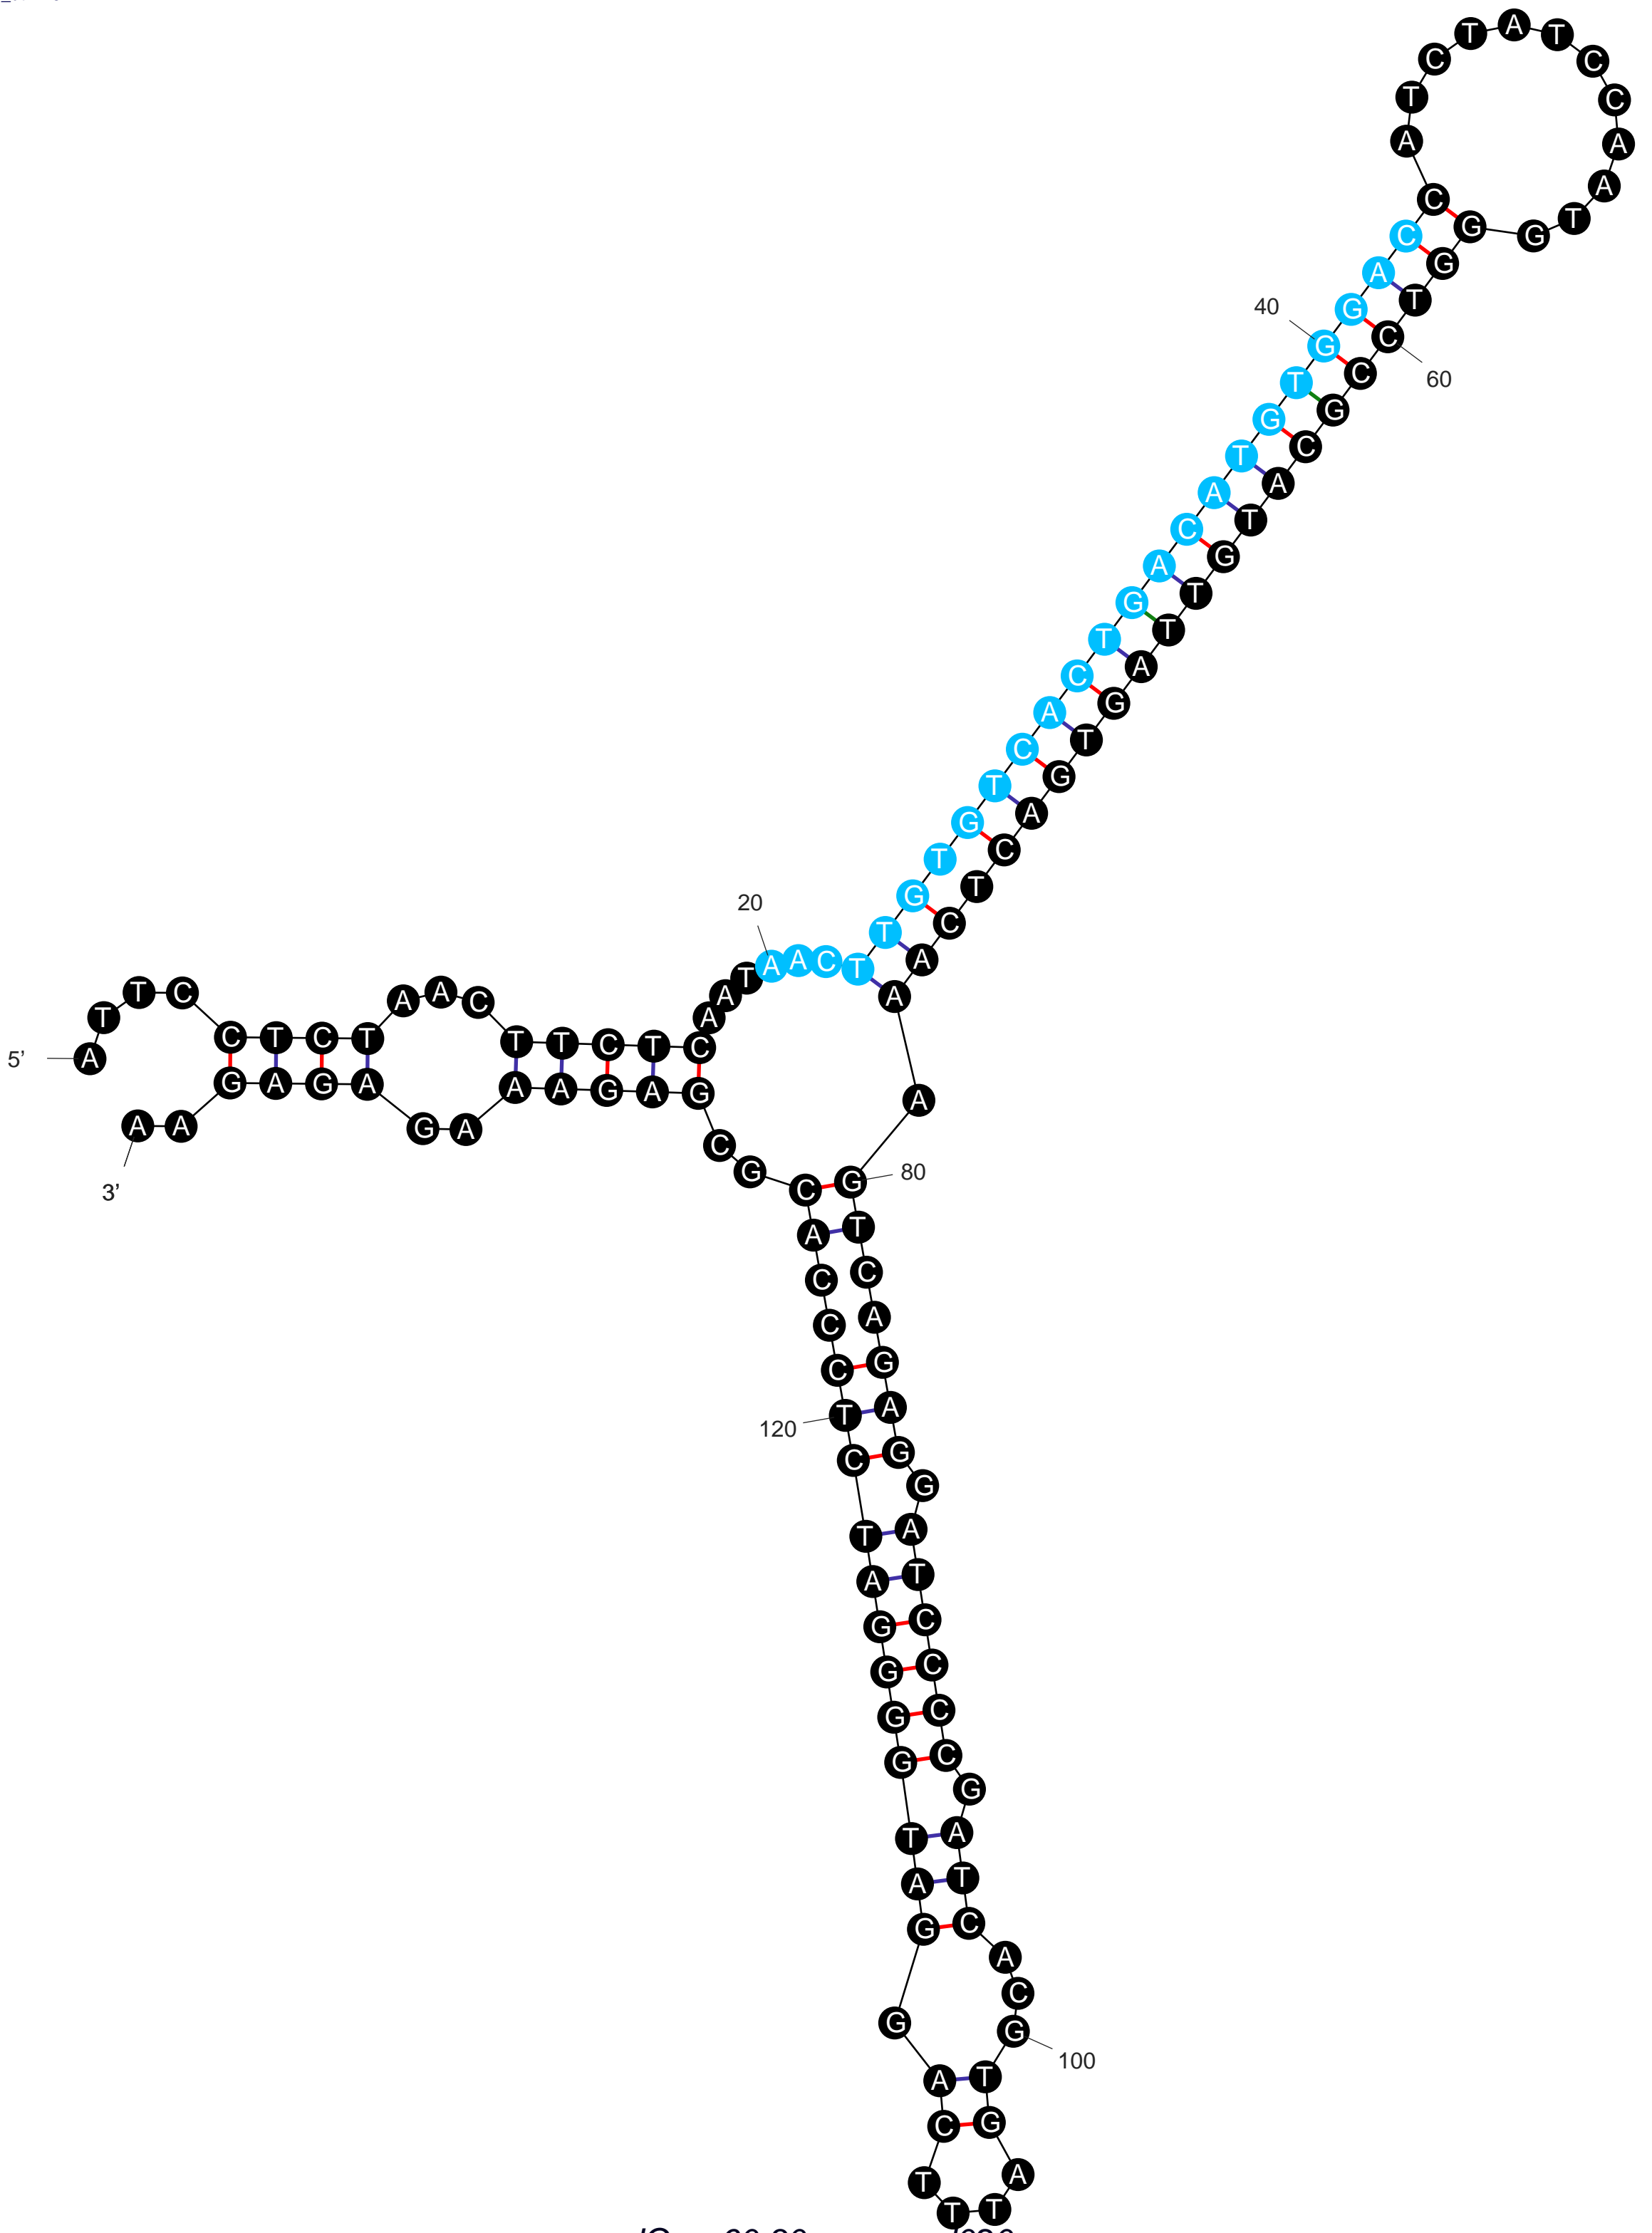



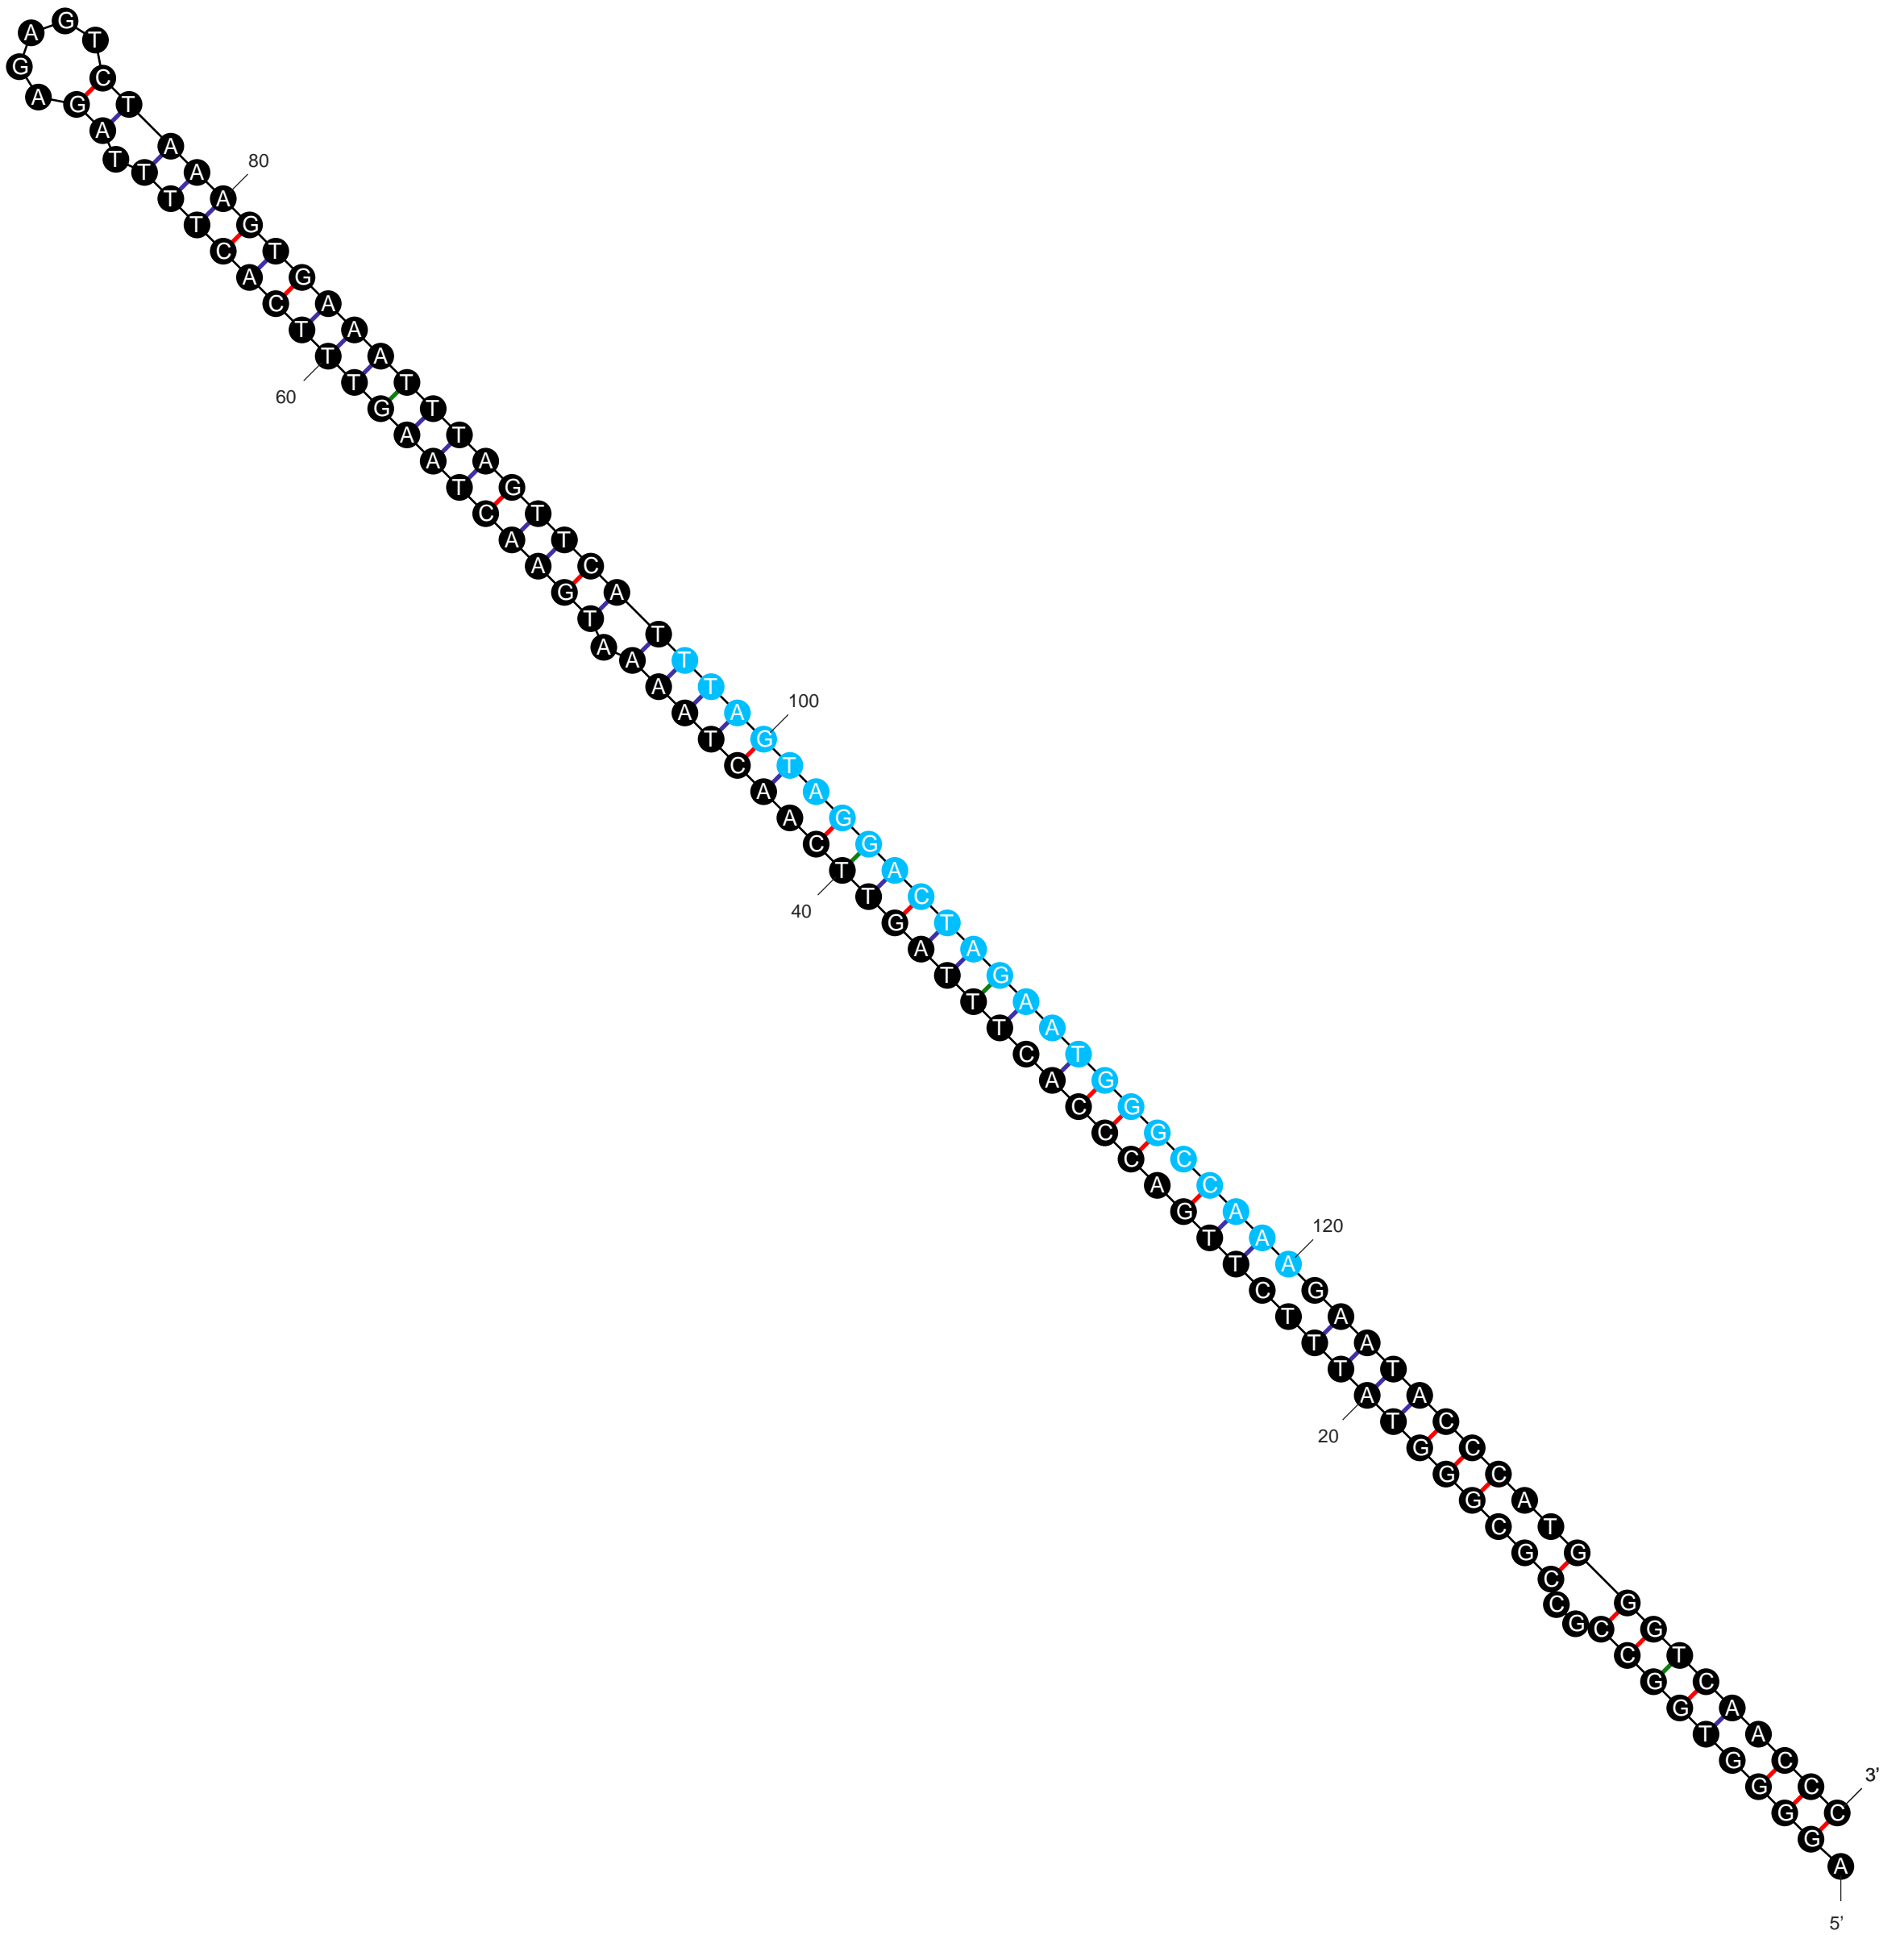

$dG = -70.10$  osa-cand021

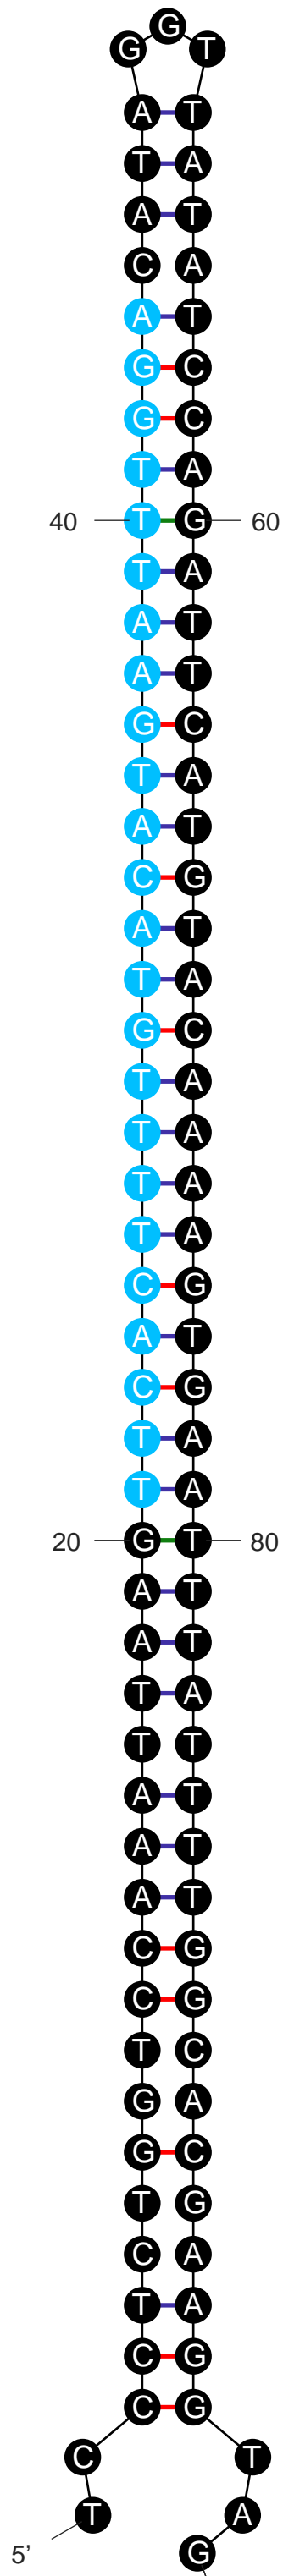

$dG = -50.00$  osa-cand022

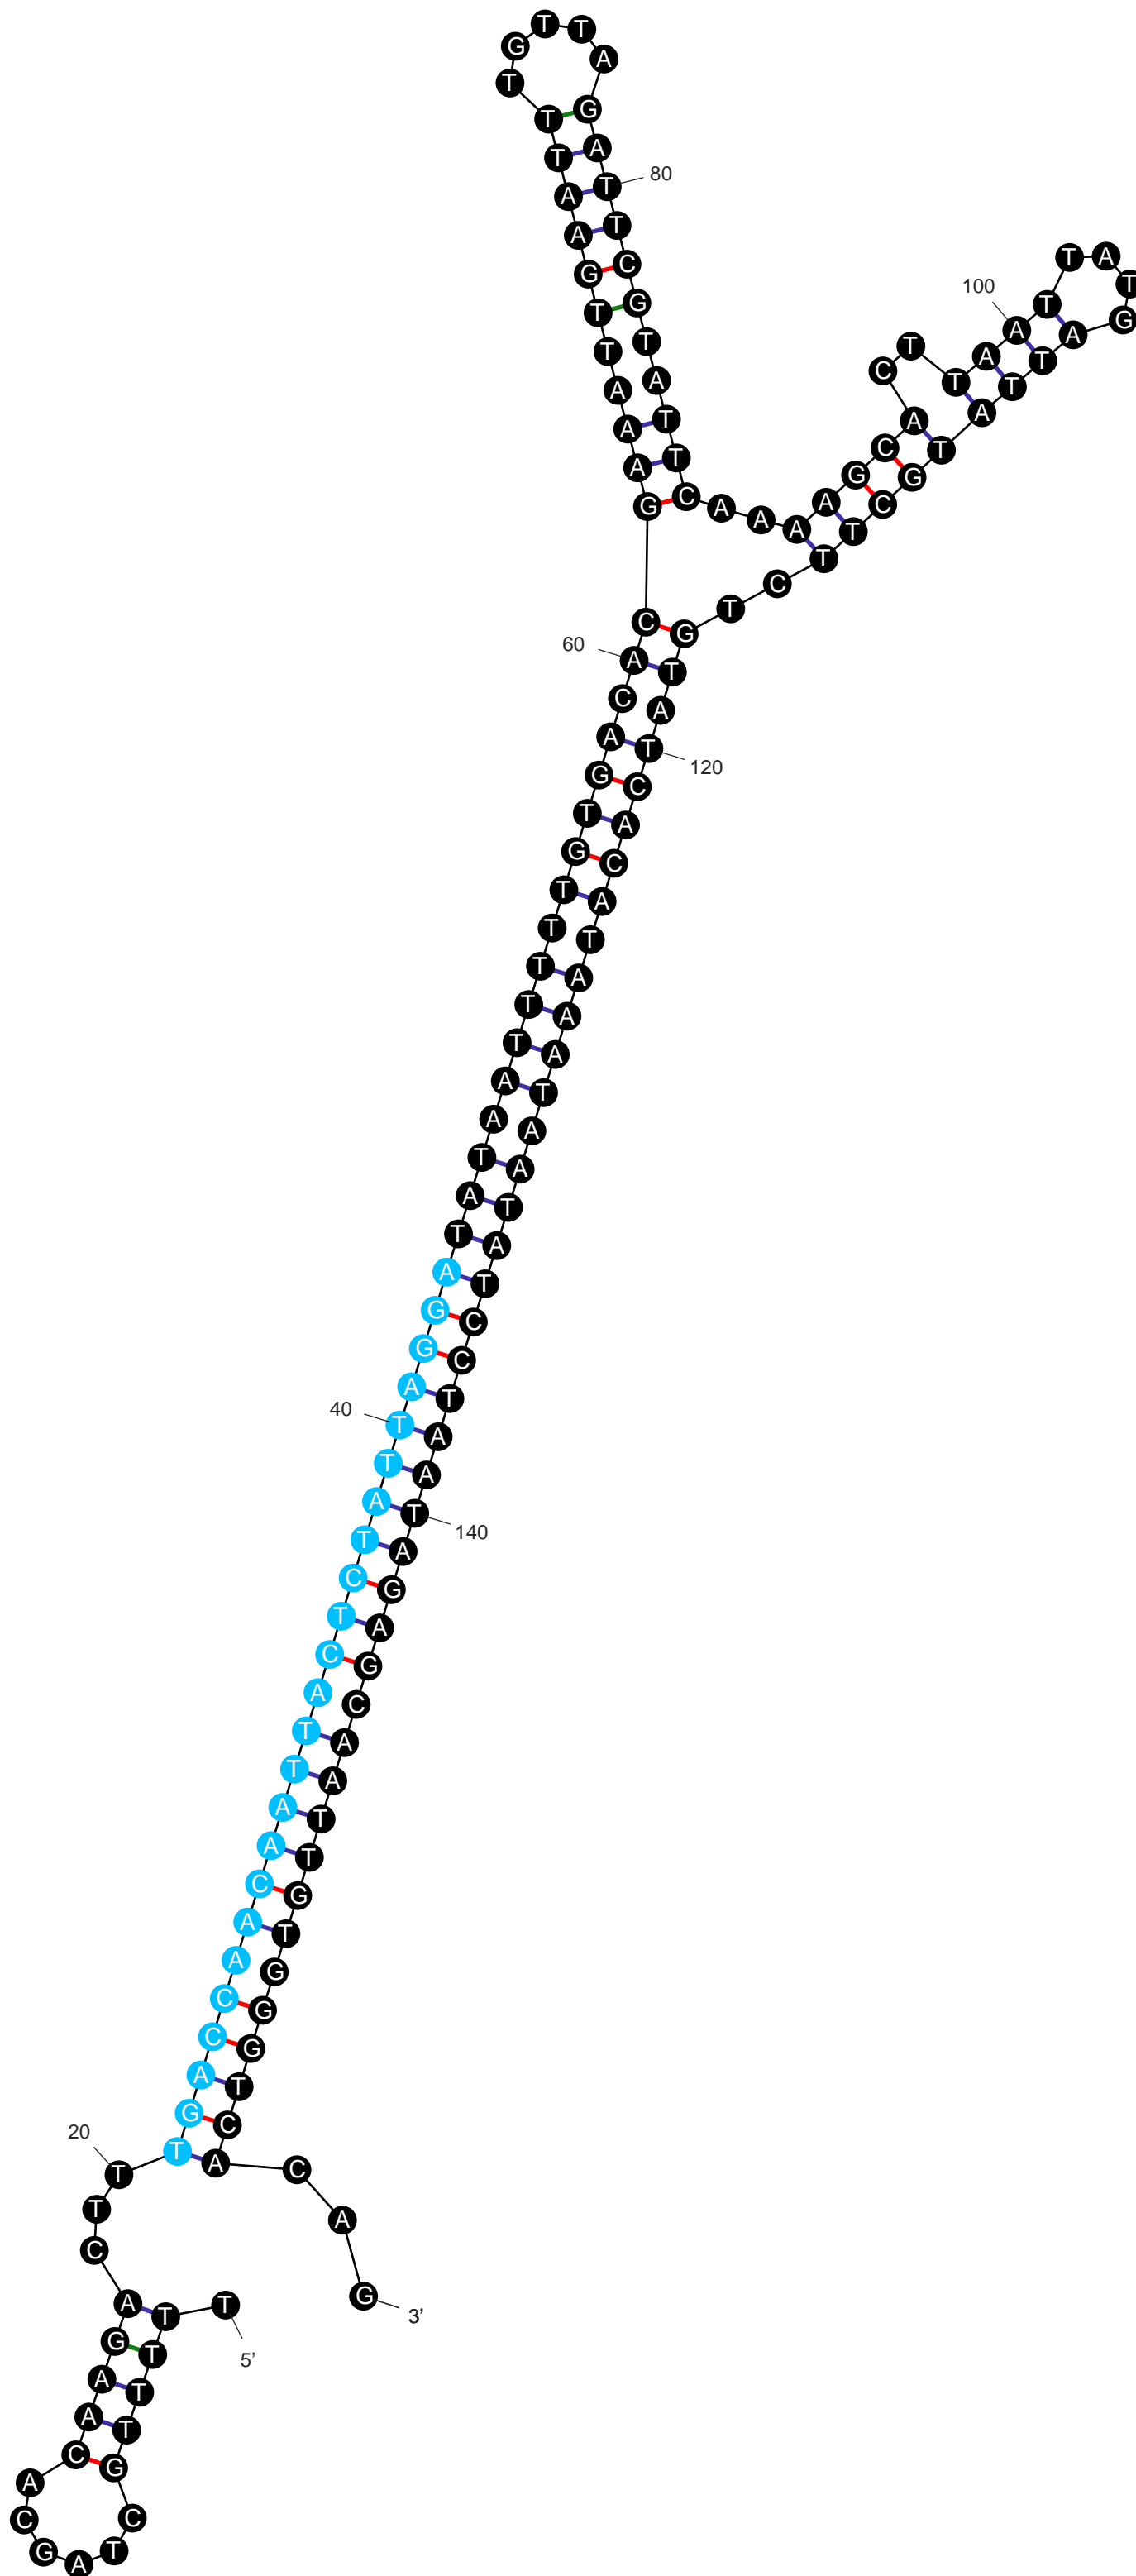

$dG = -50.40$  osa-cand023

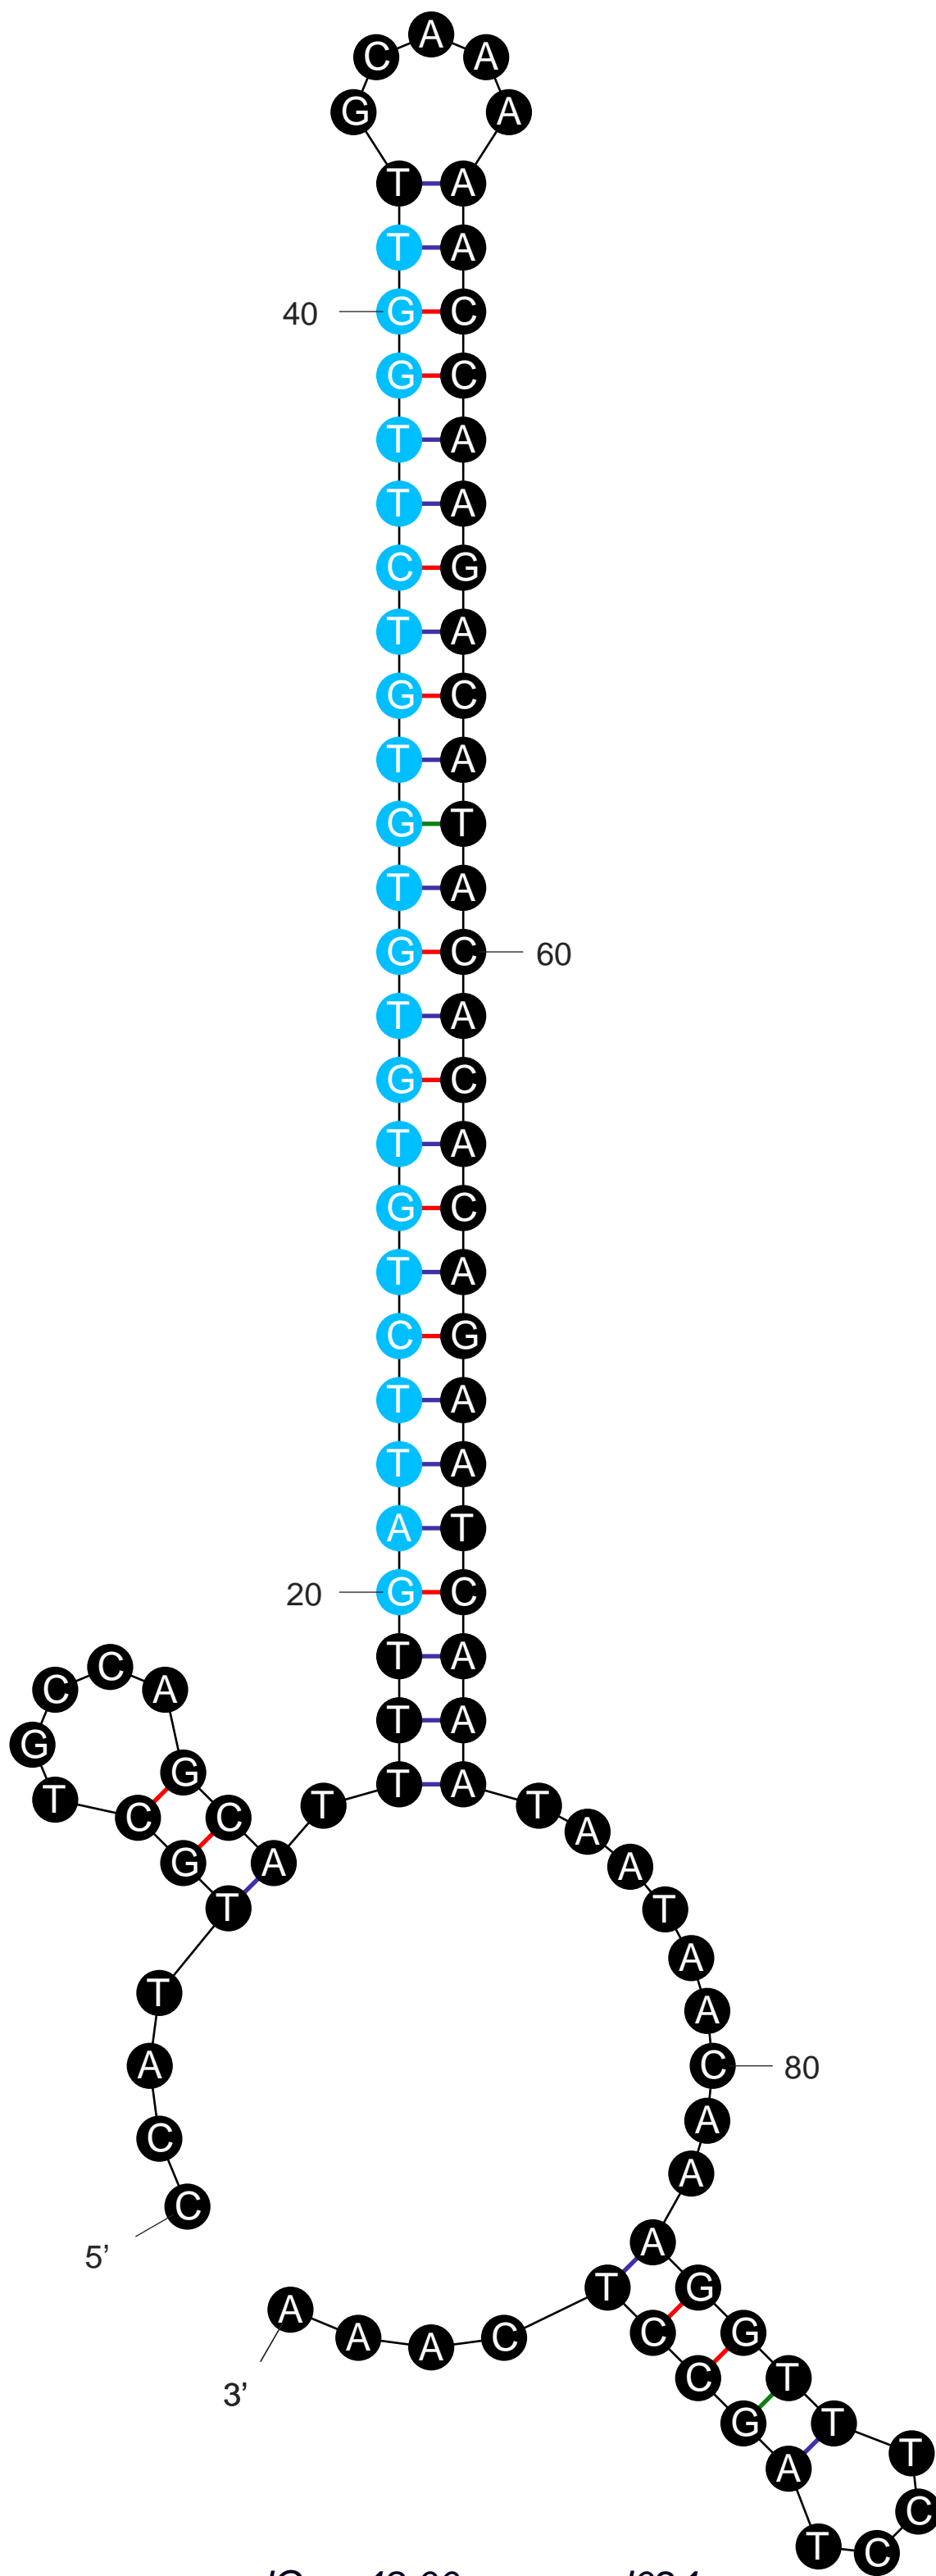

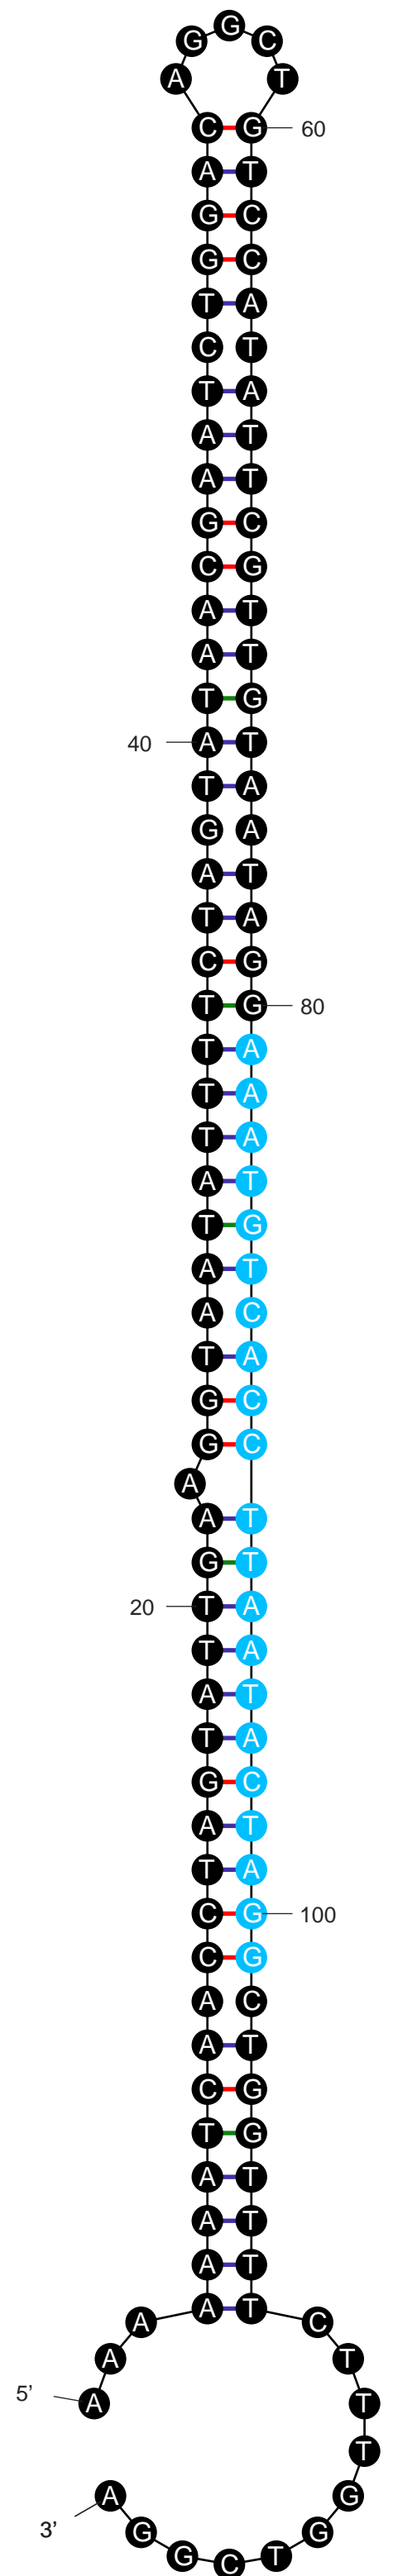

$dG = -53.40$  osa-cand025

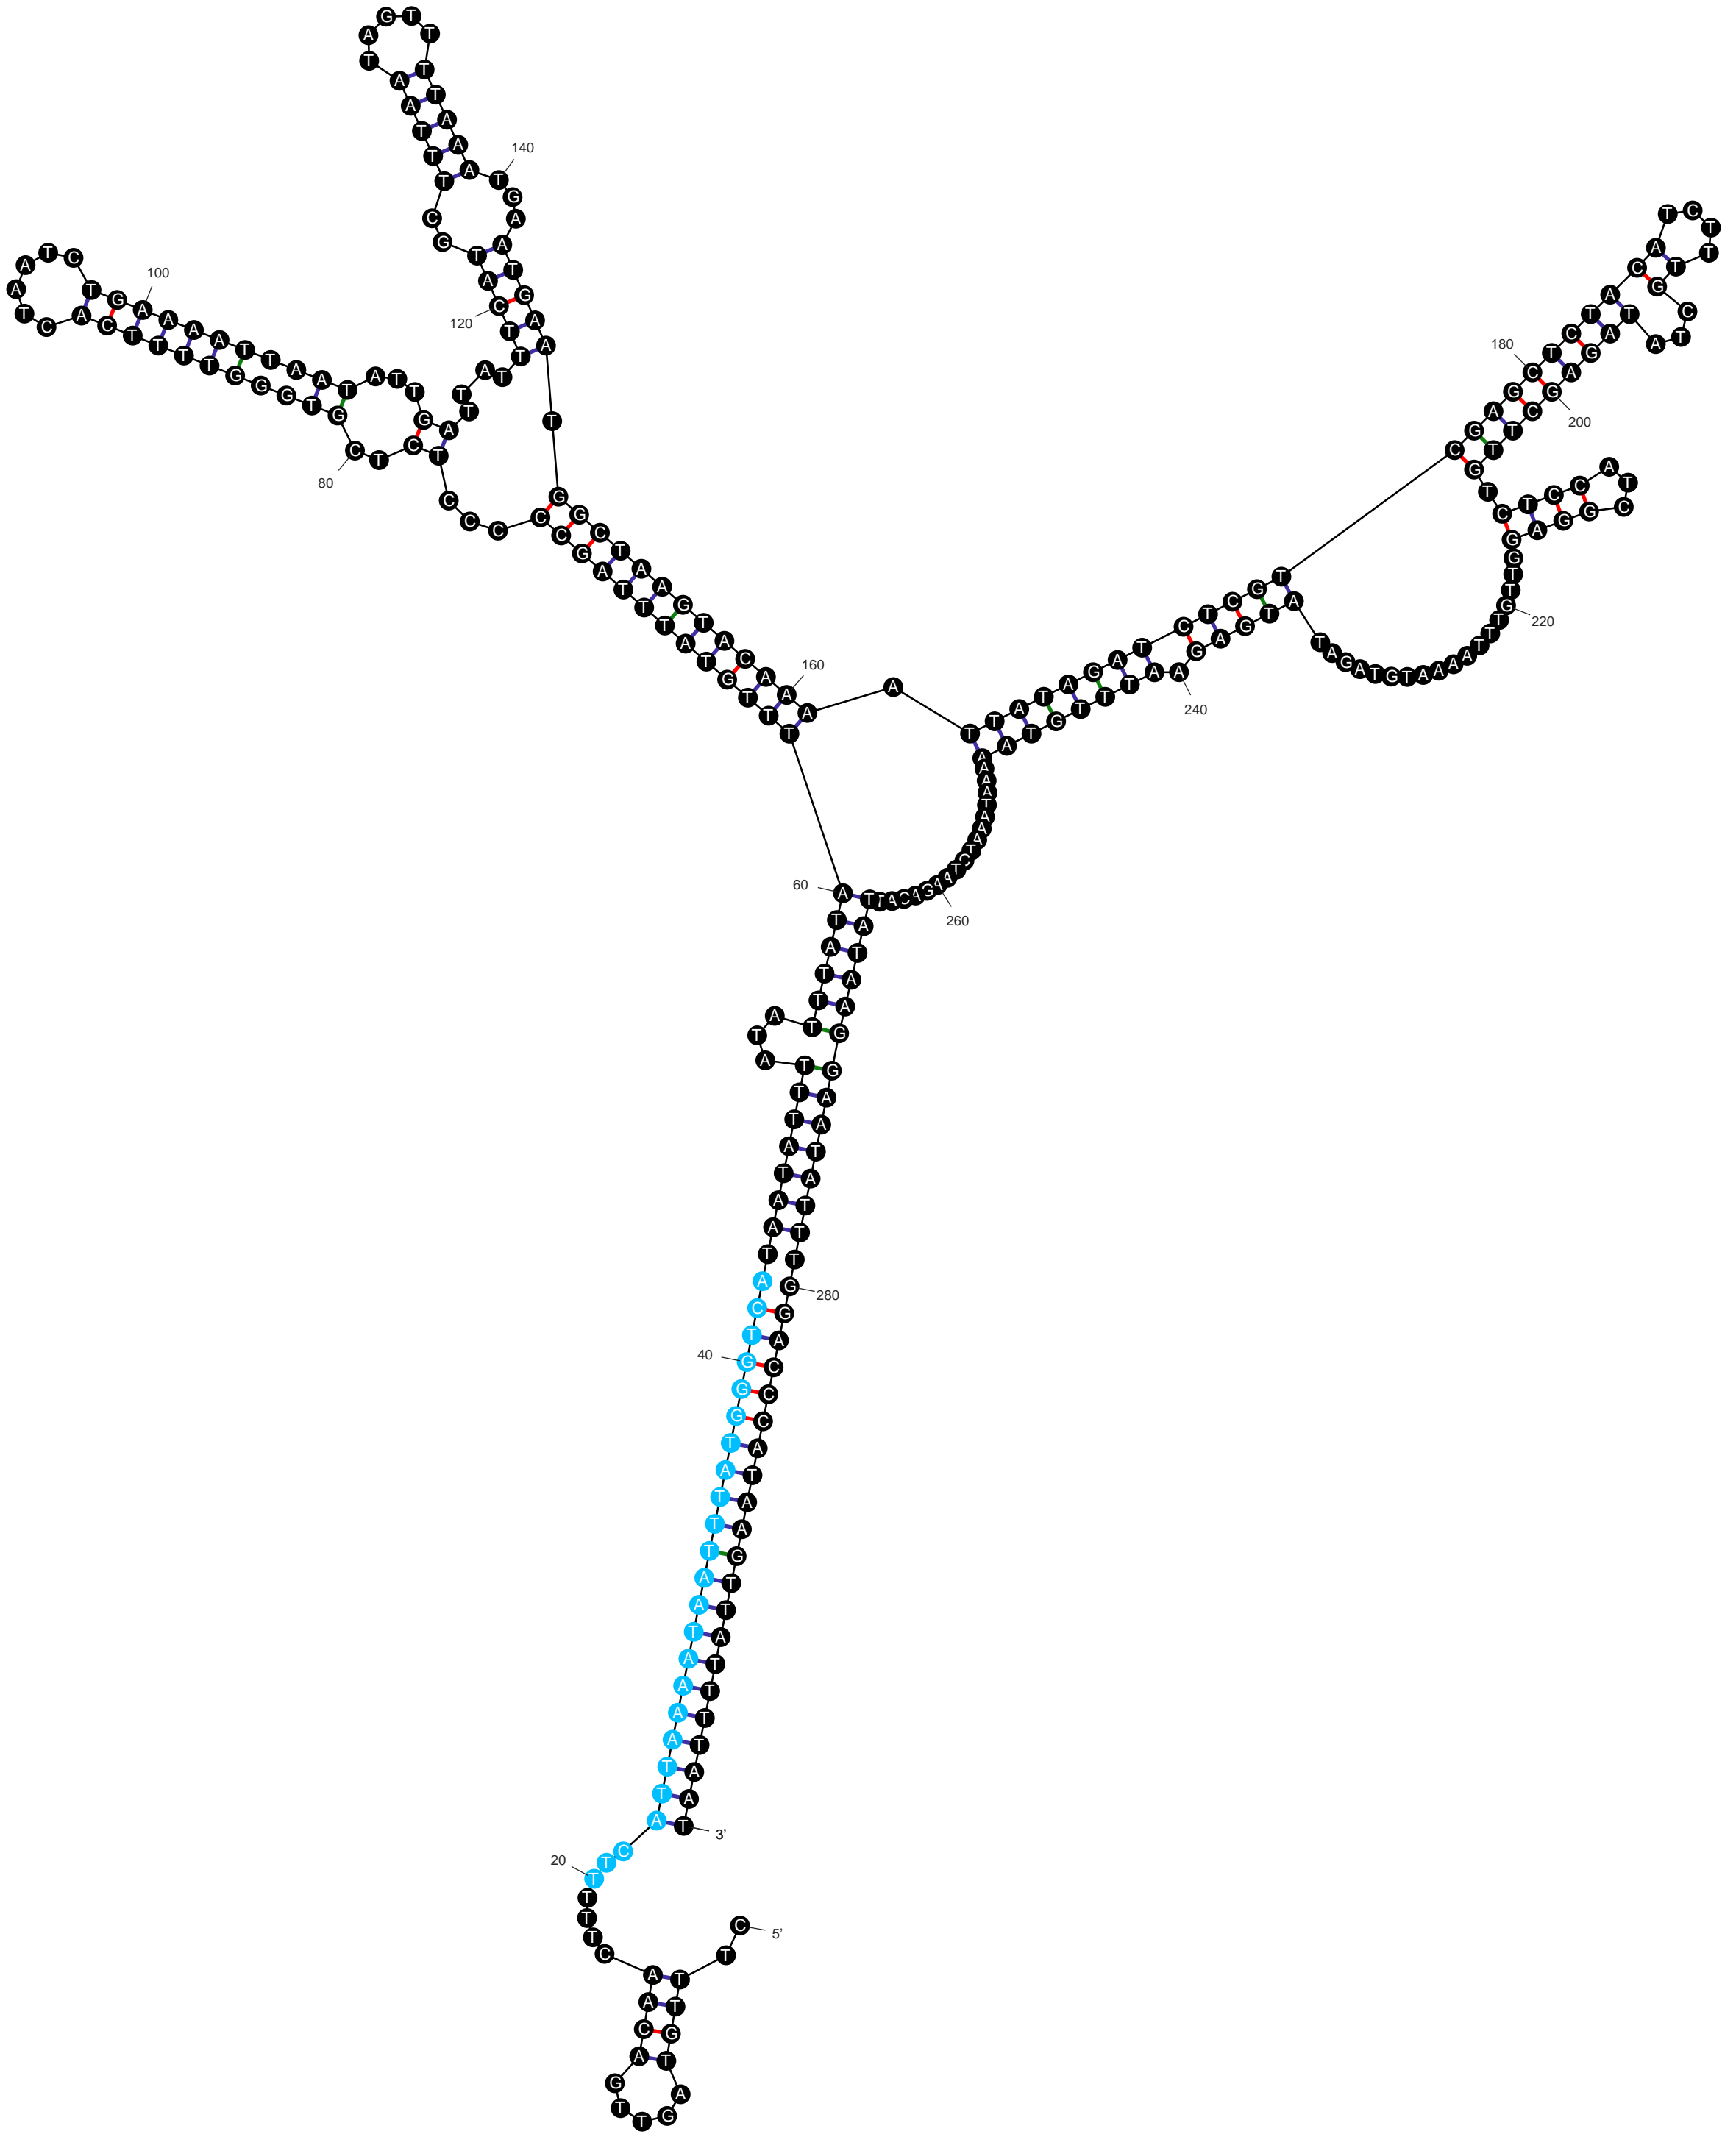

$dG = -76.80$  osa-cand026

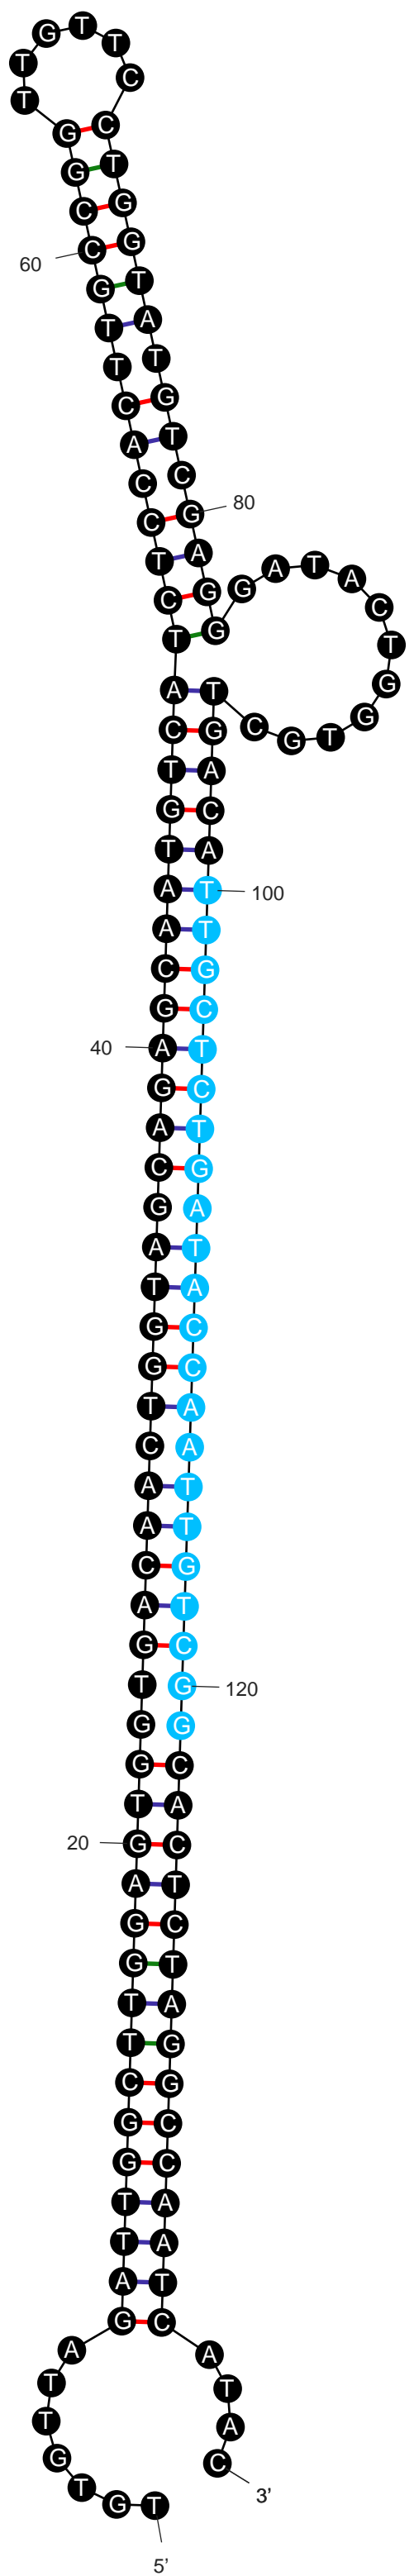

$dG = -73.20$  osa-cand027

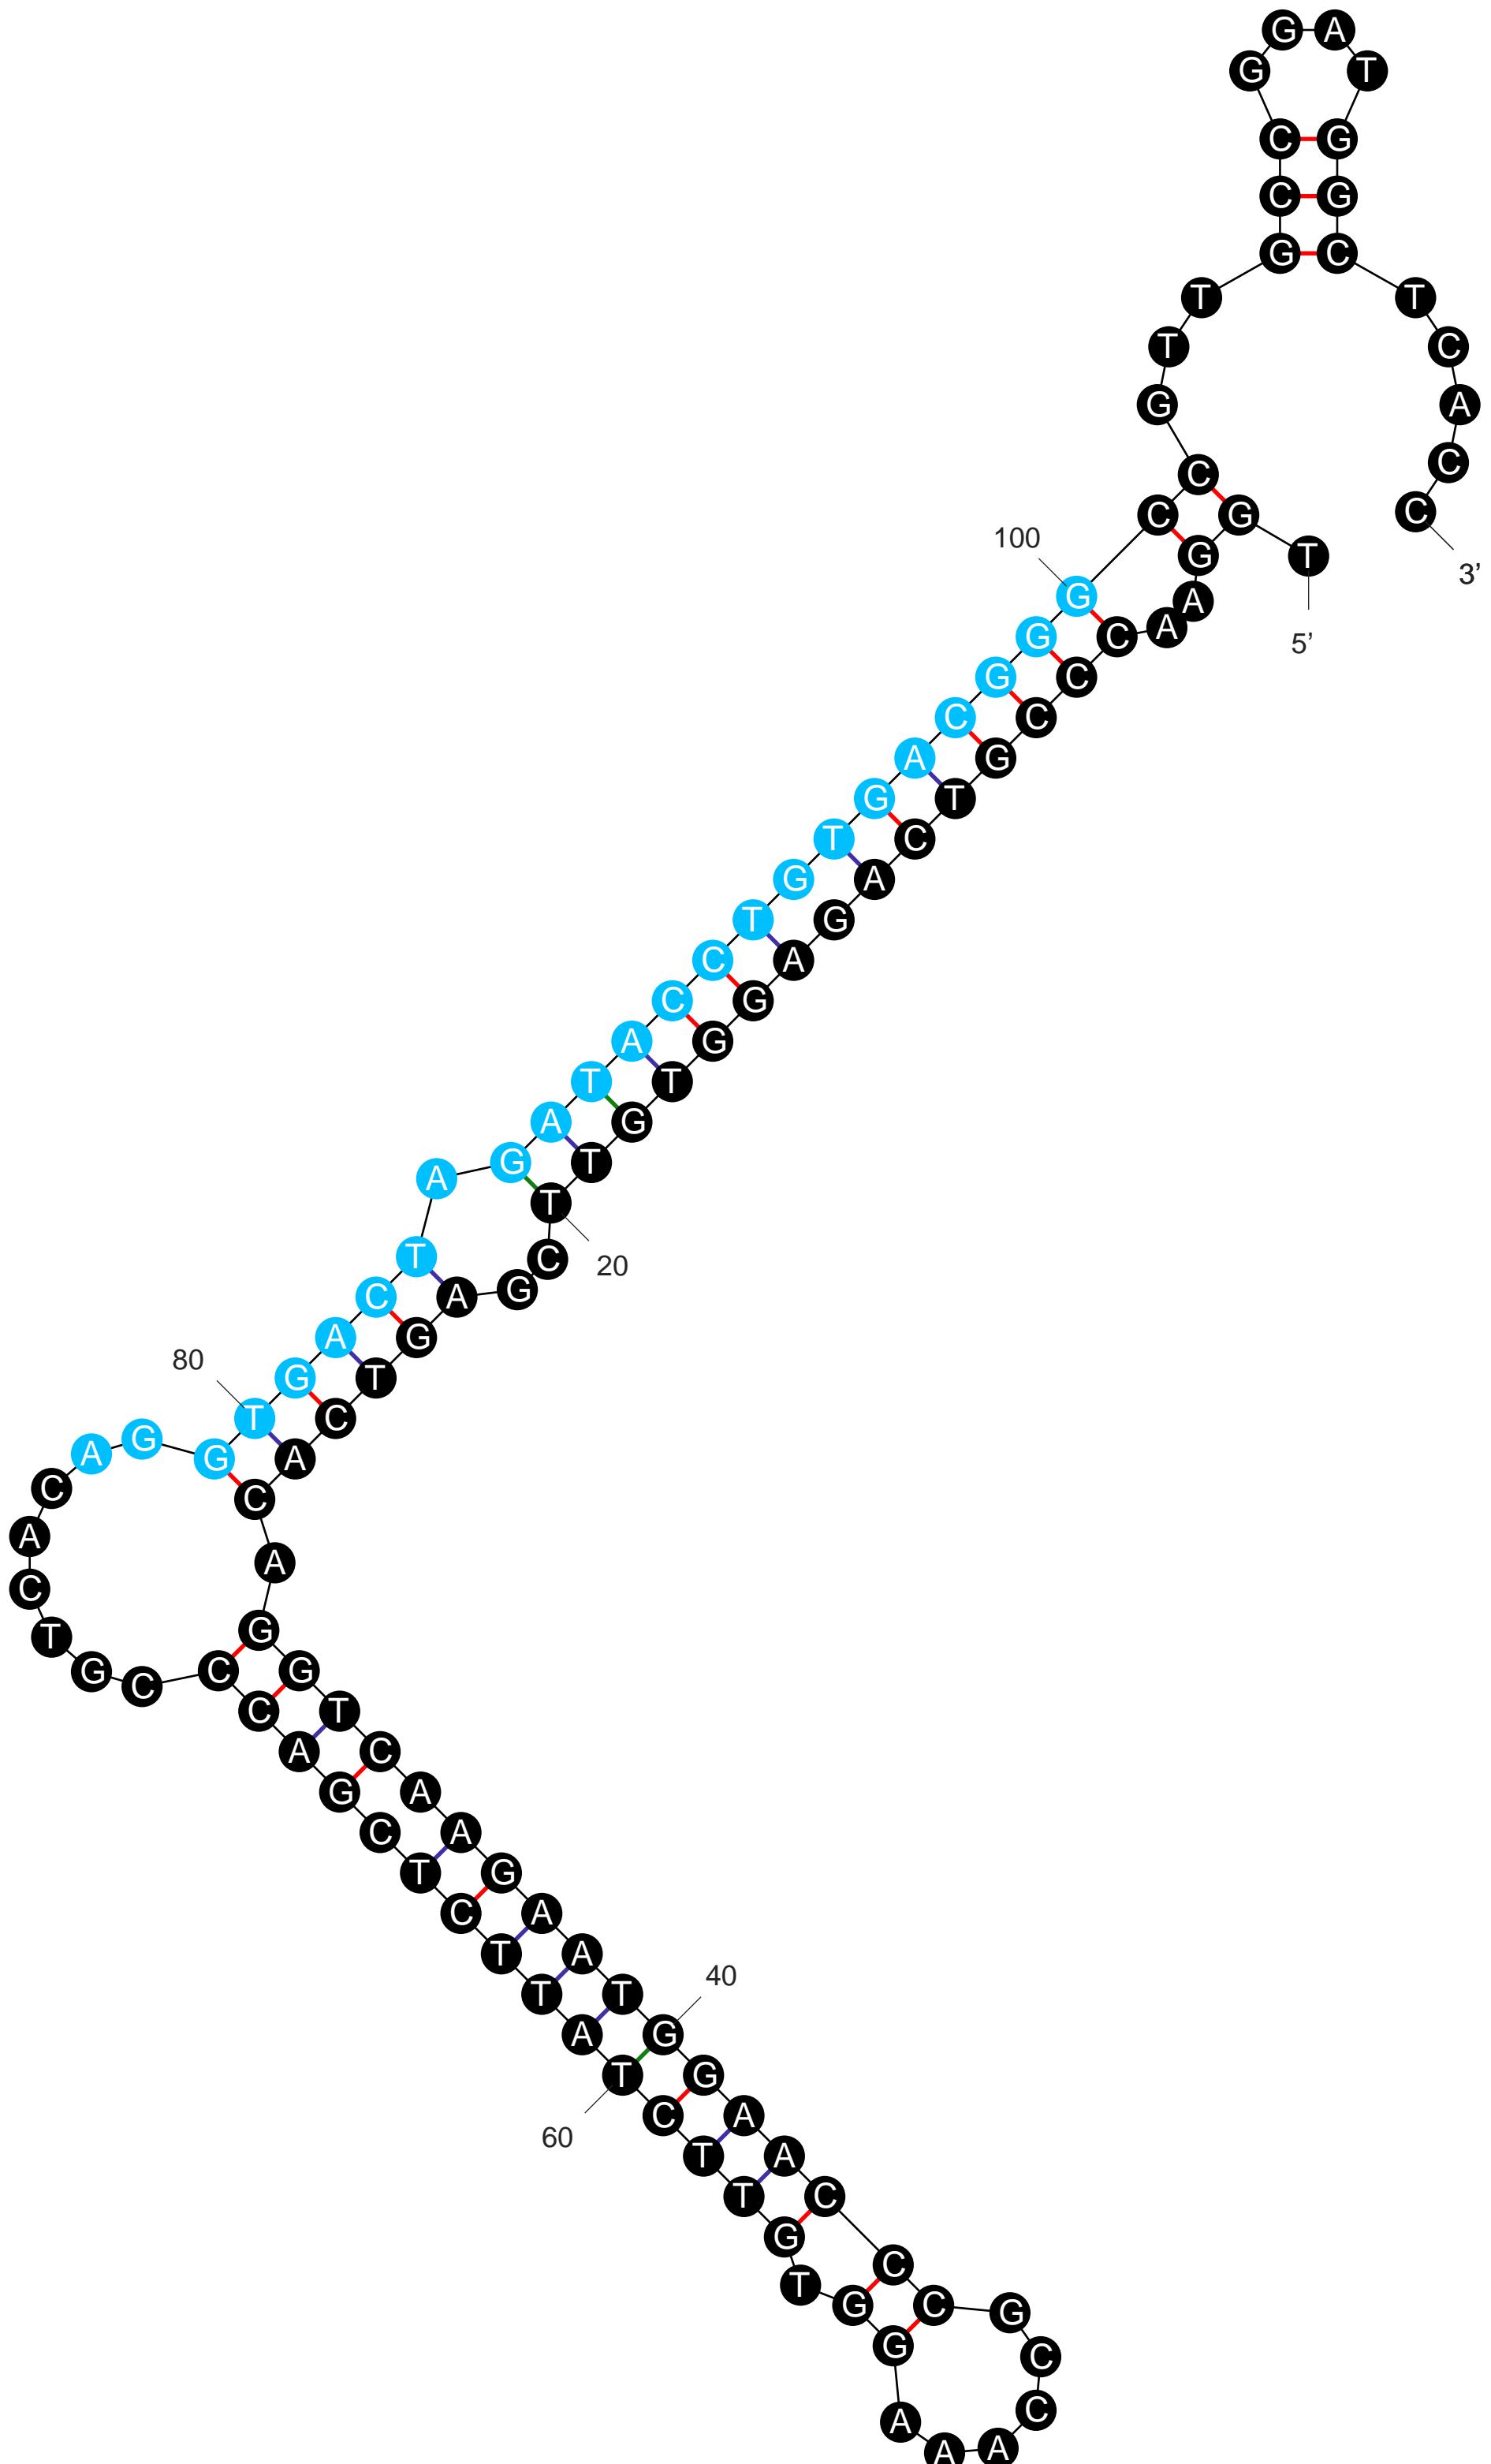

$dG = -57.00$  osa-cand028



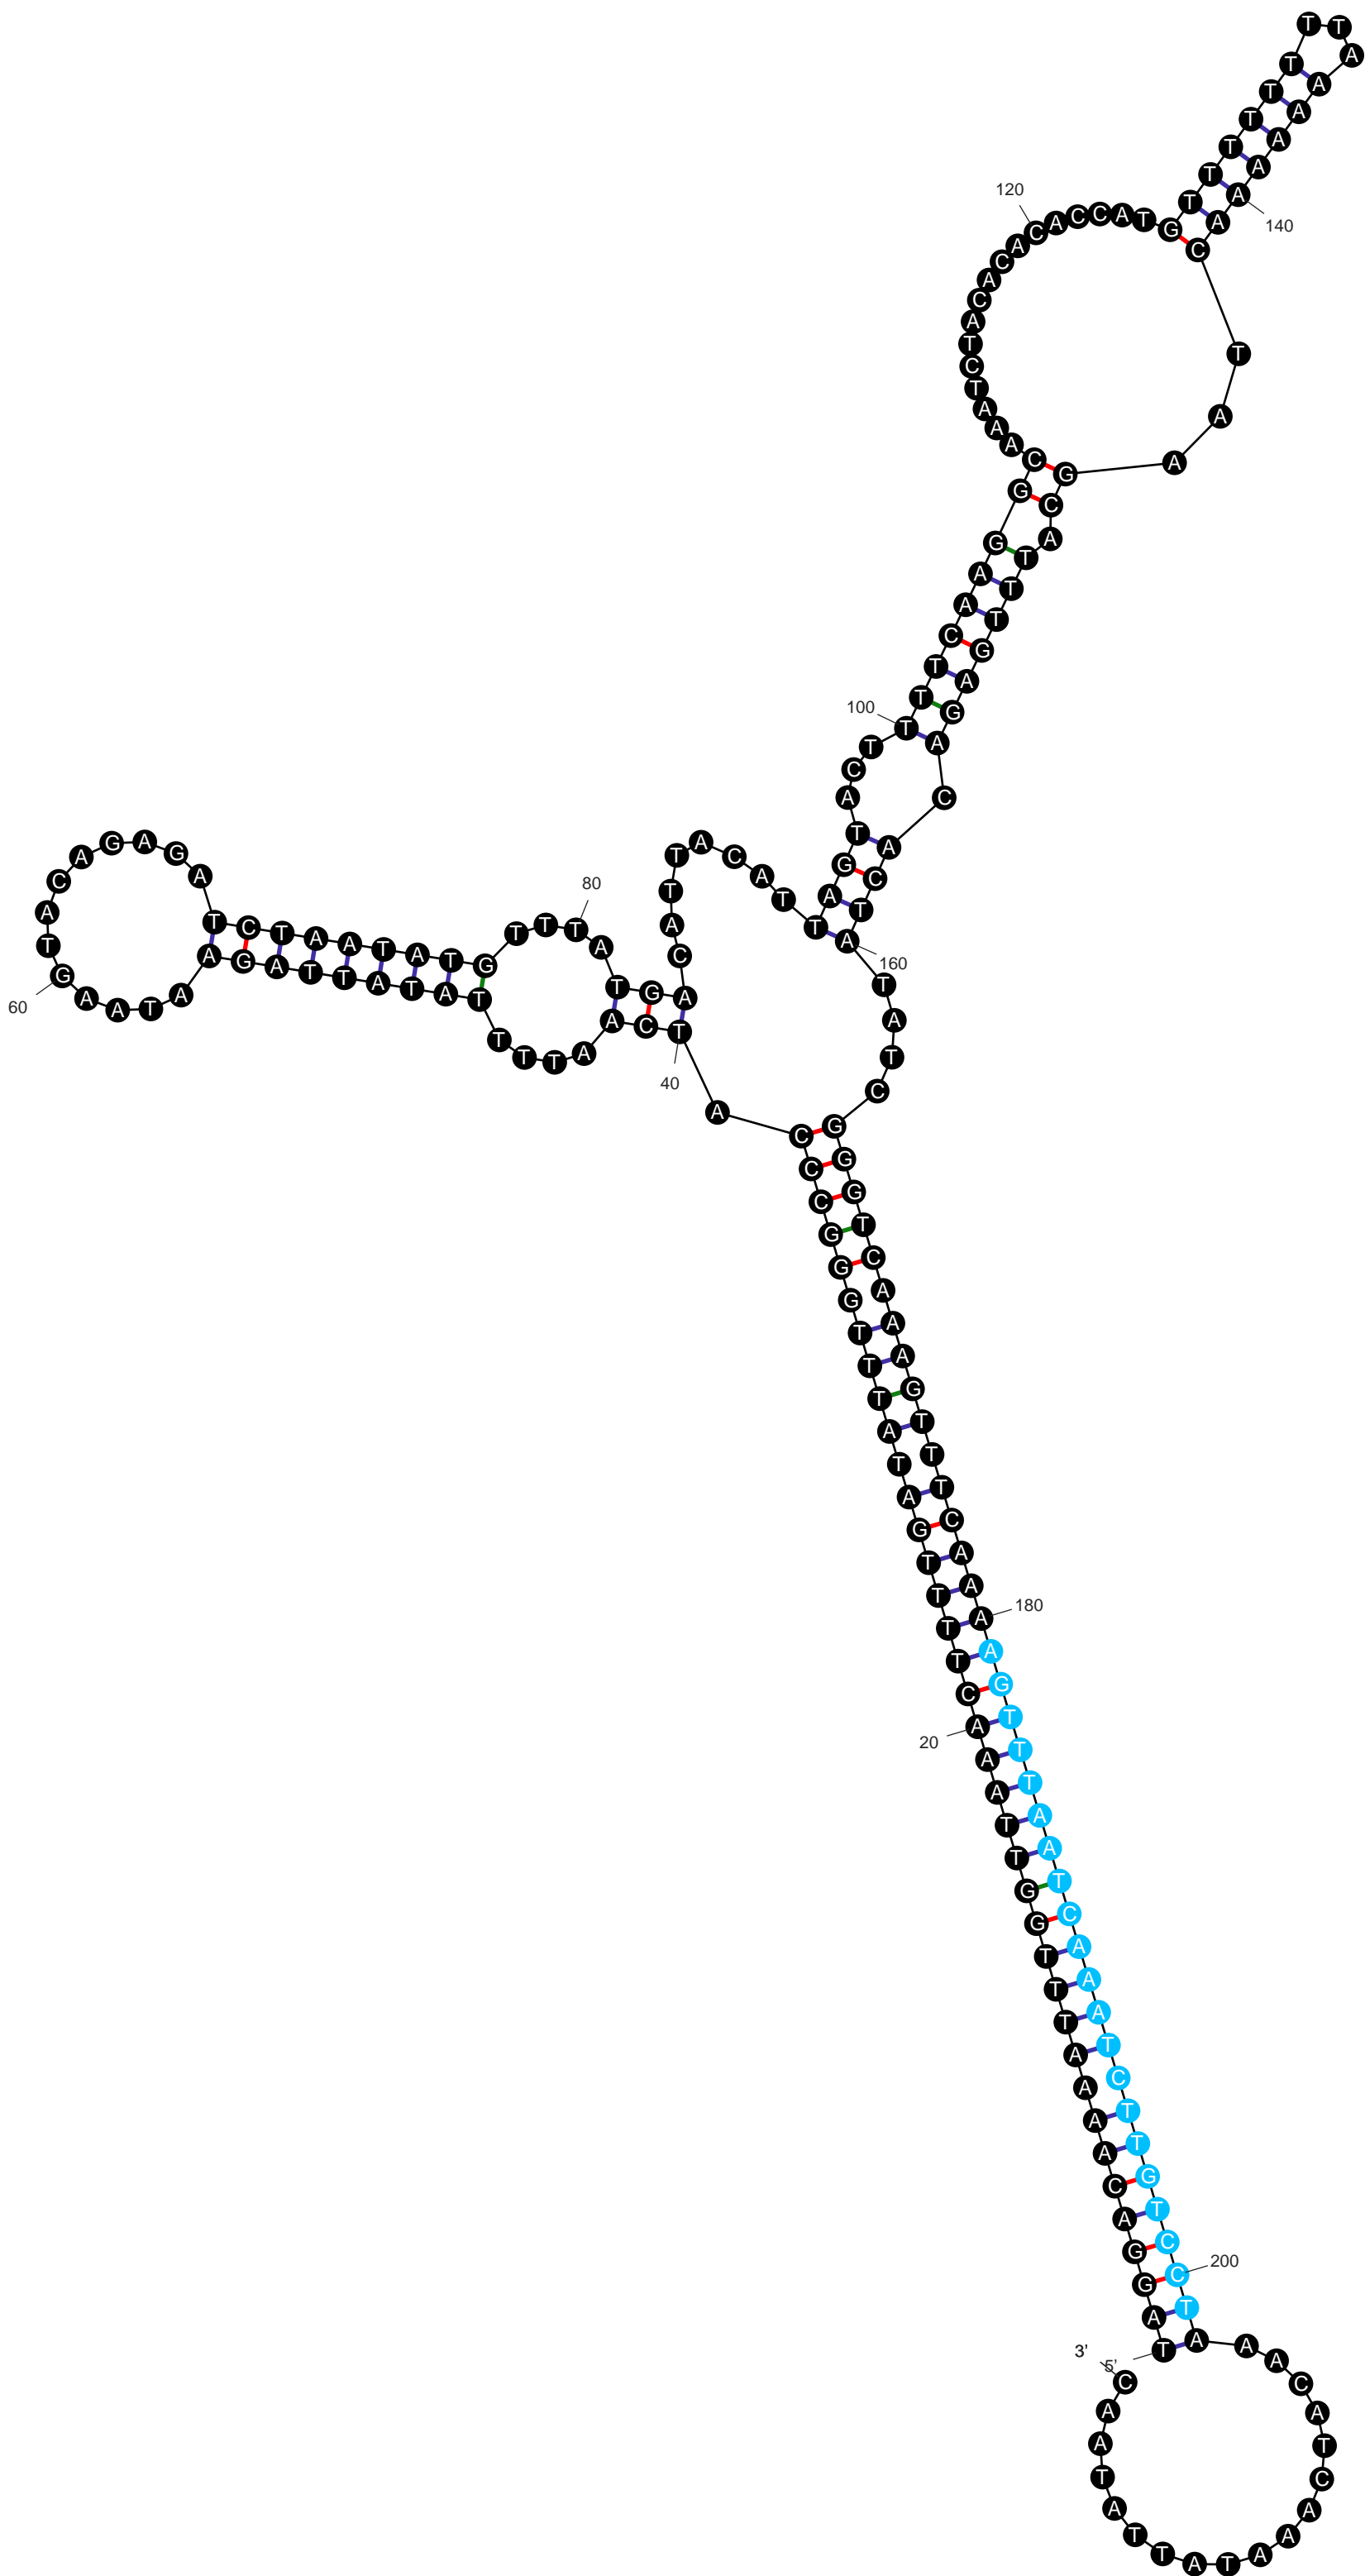

$dG = -56.80$  osa-cand029

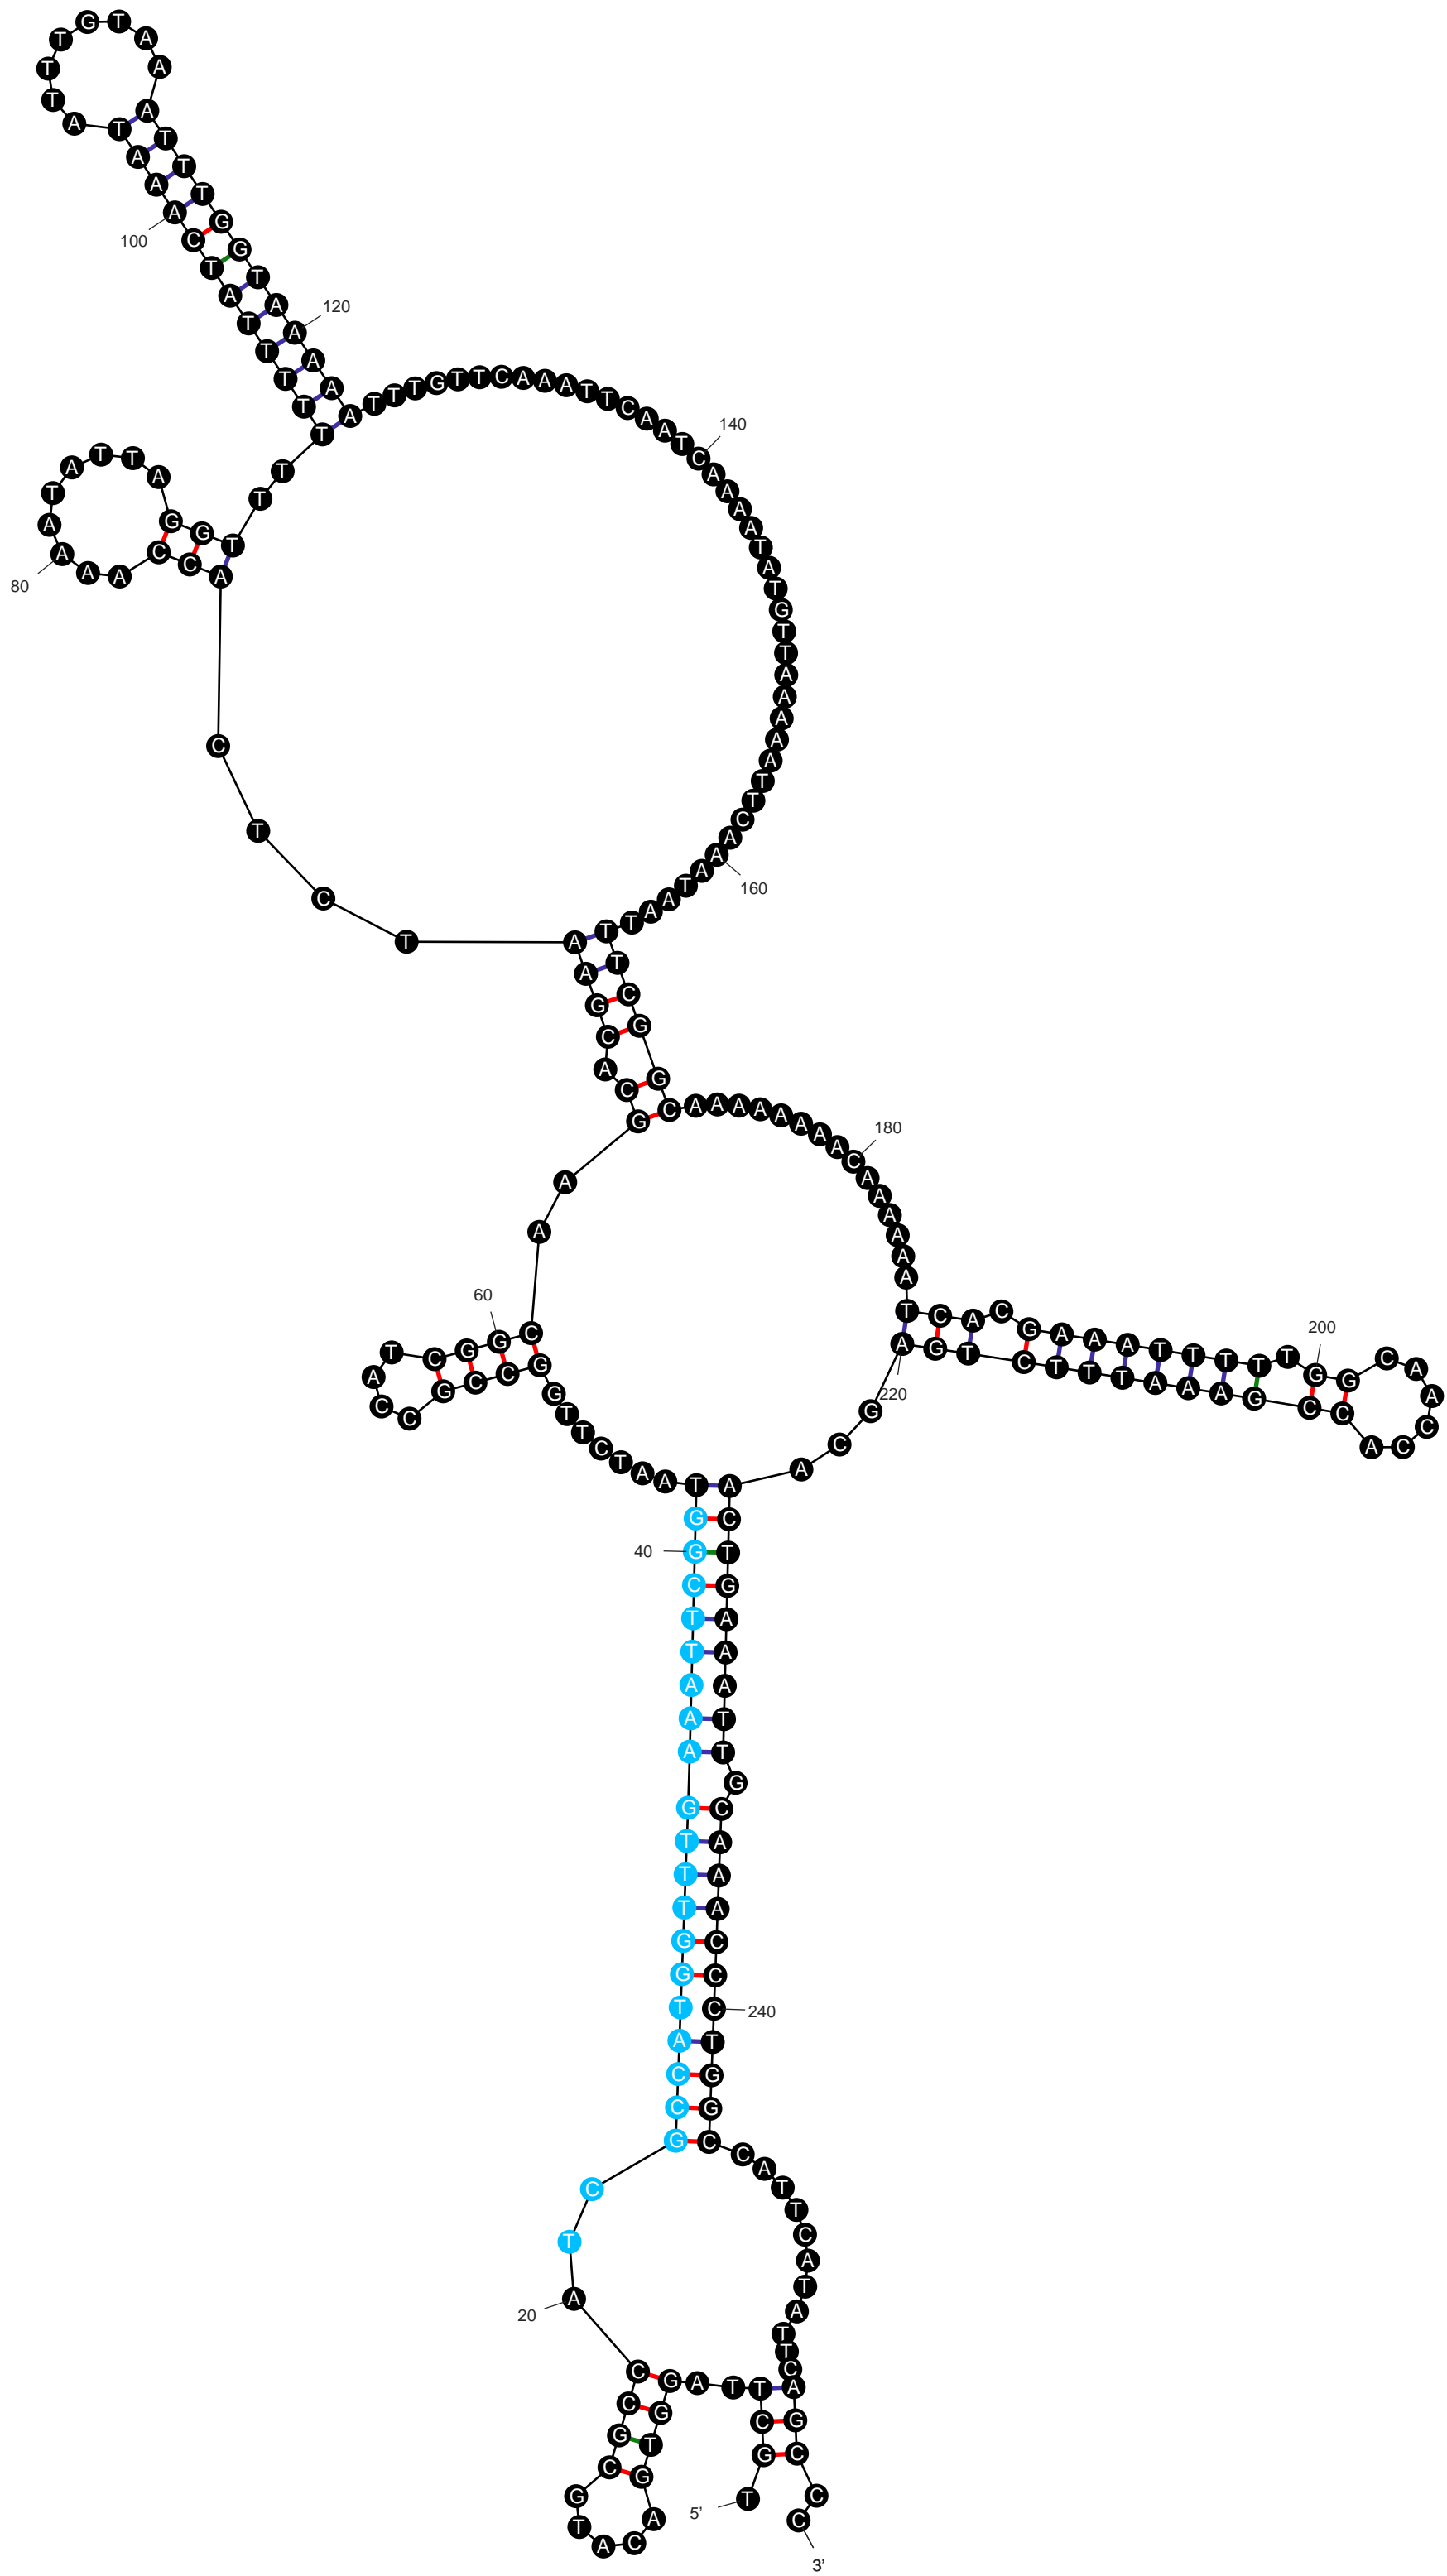

$dG = -55.40$  osa-cand030

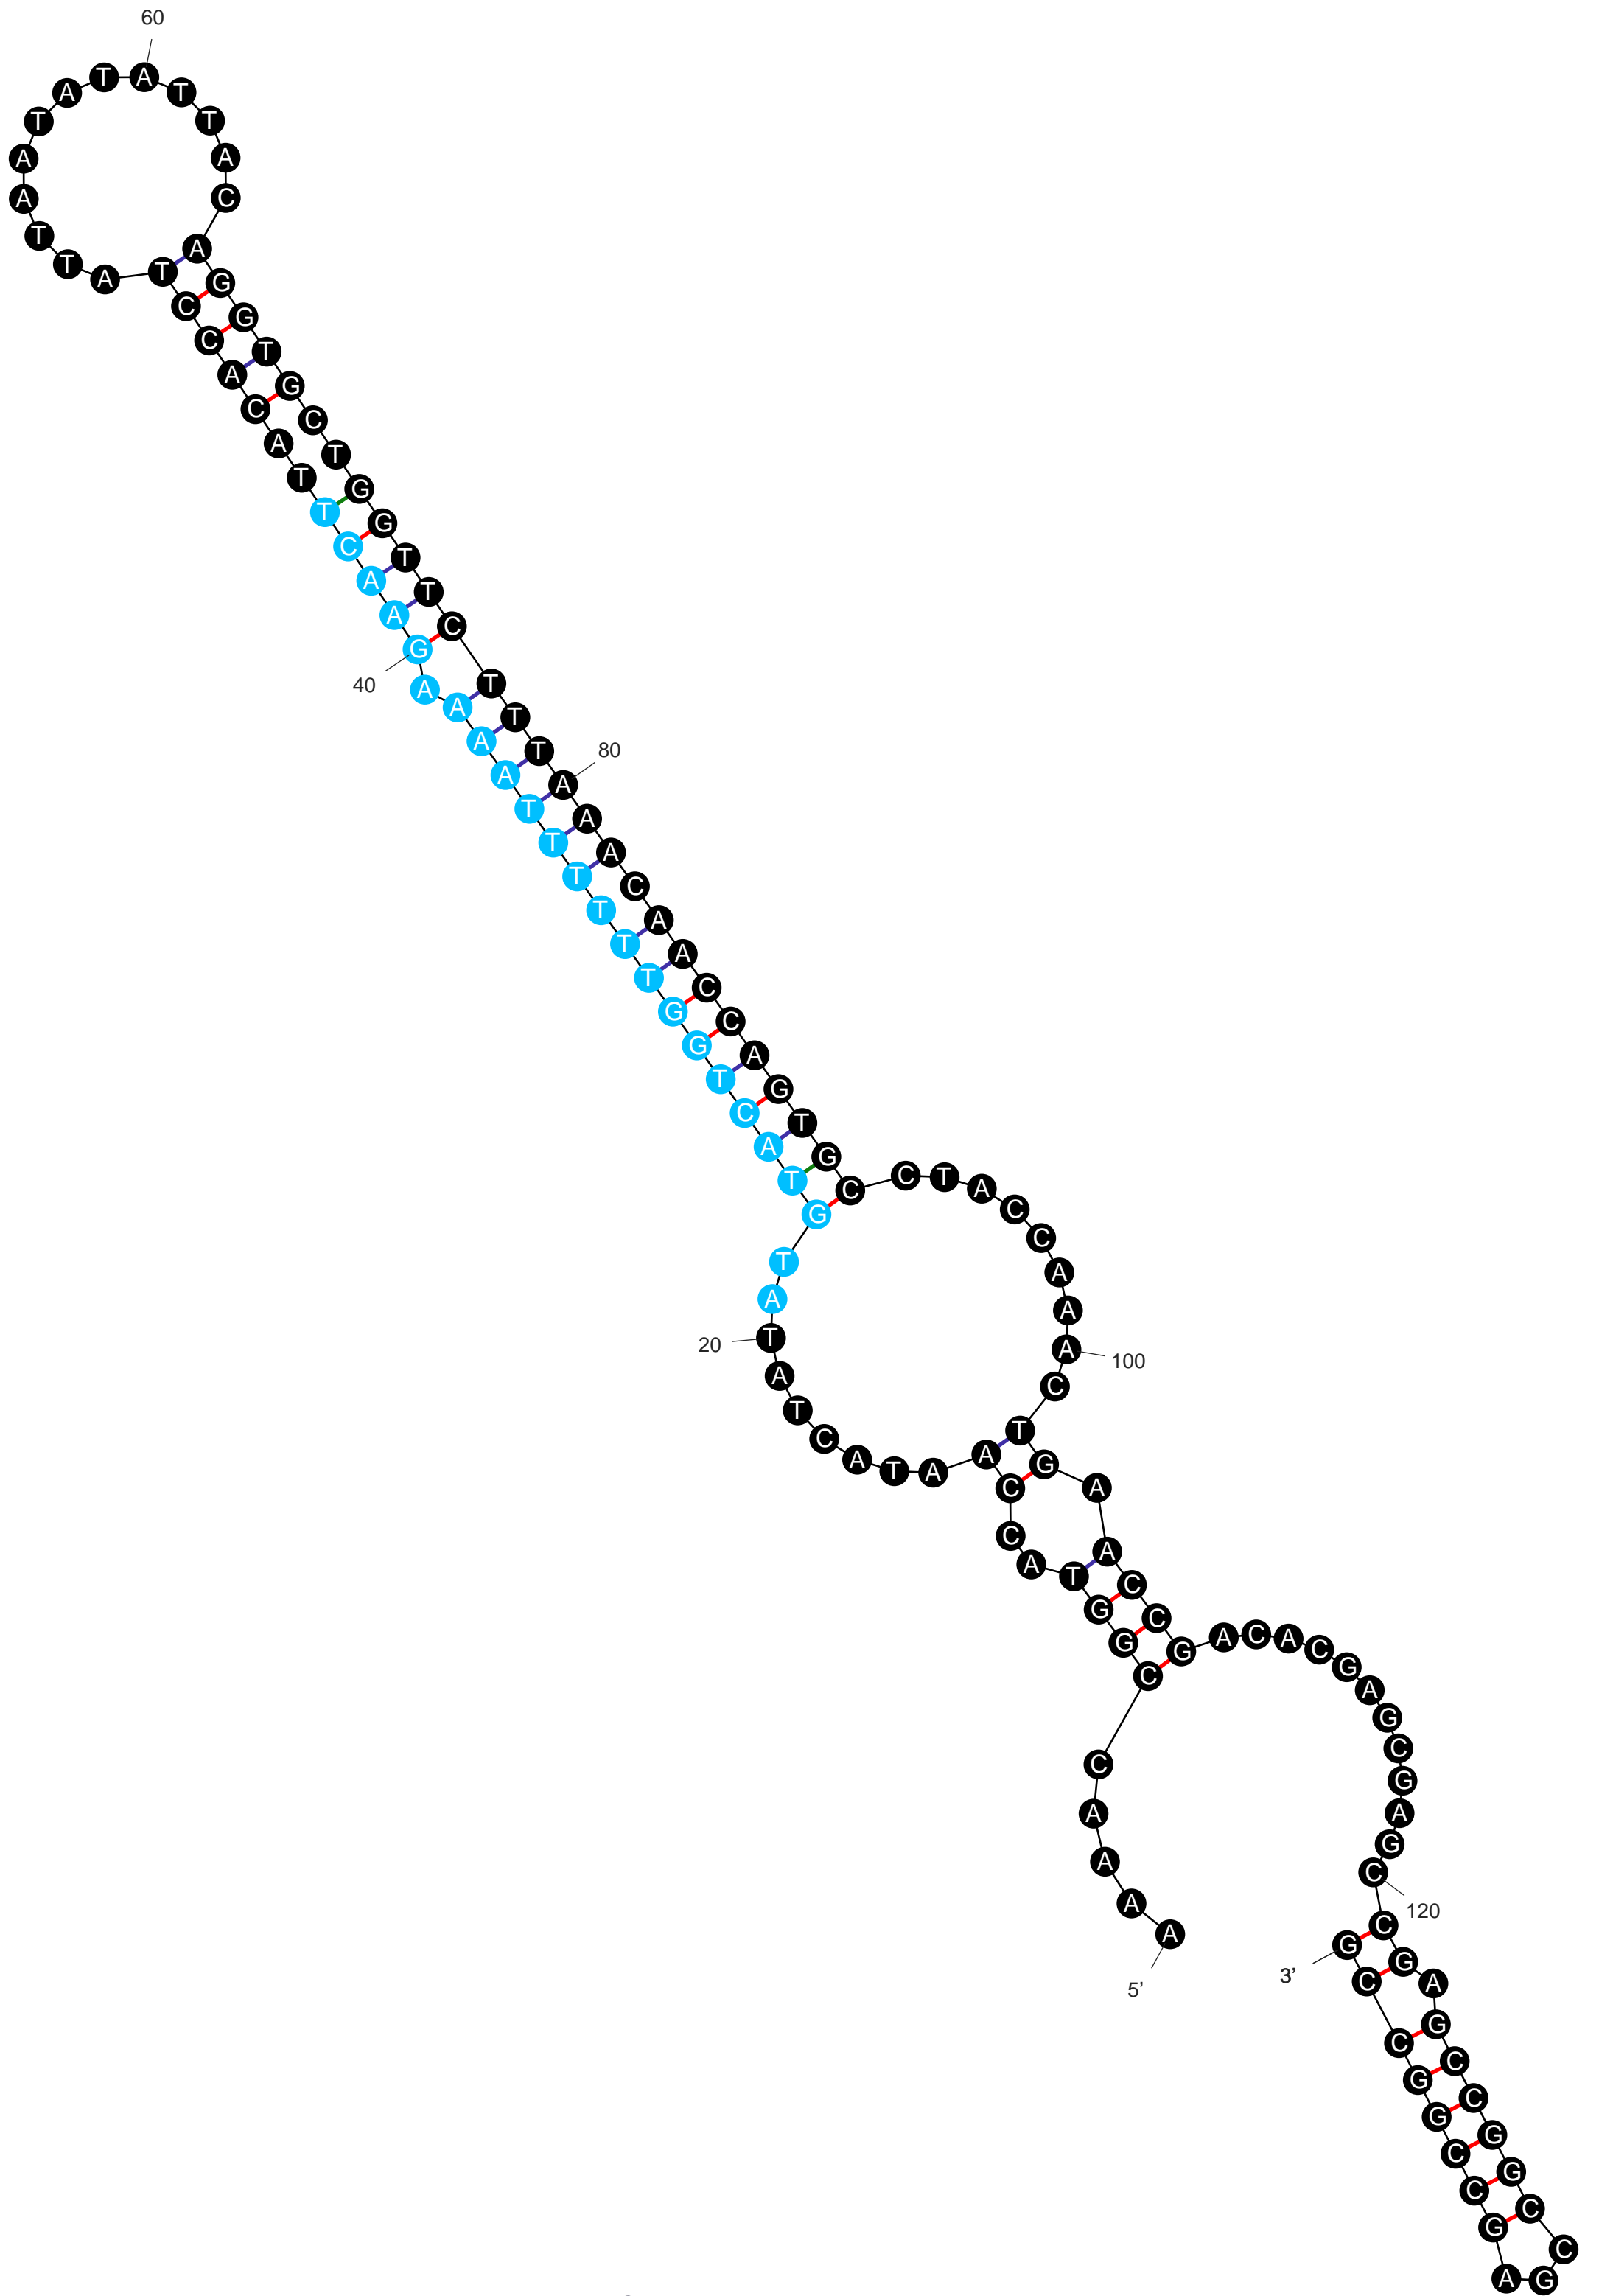

$dG = -44.60$  osa-cand031

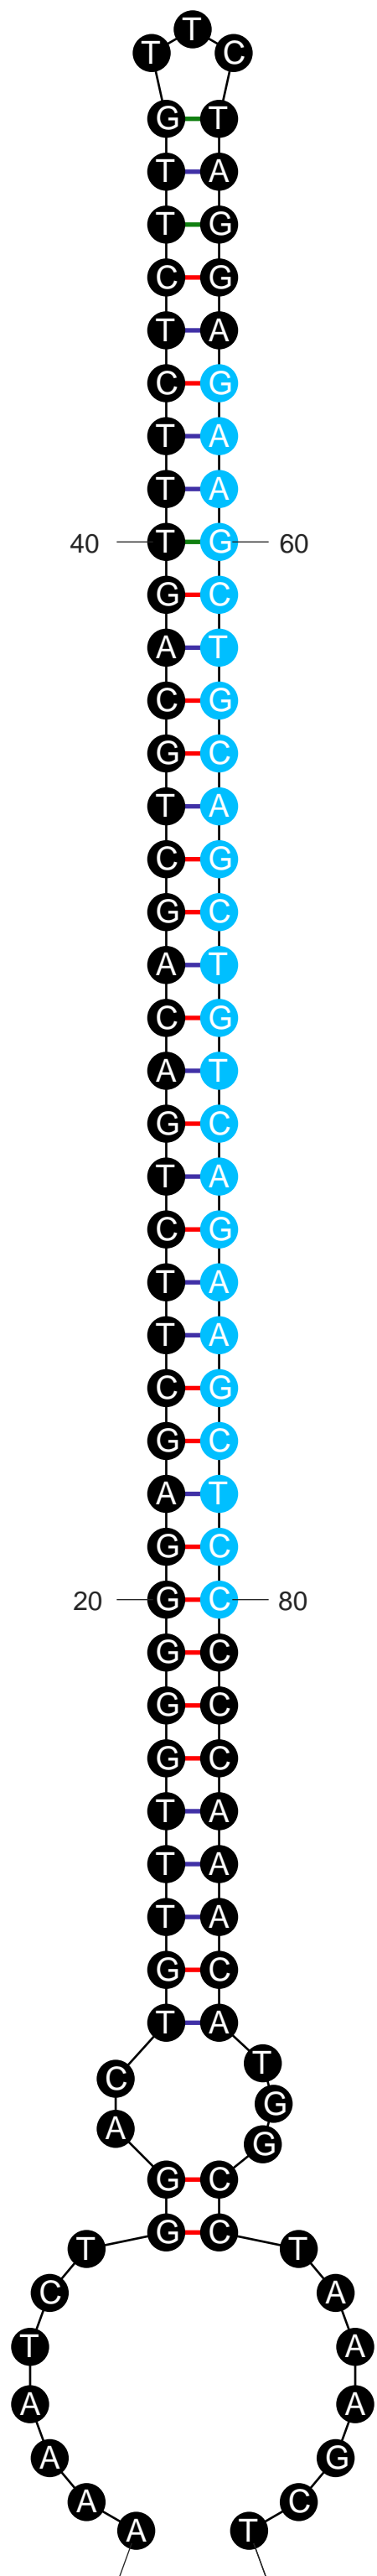

$dG = -73.90$  osa-cand032

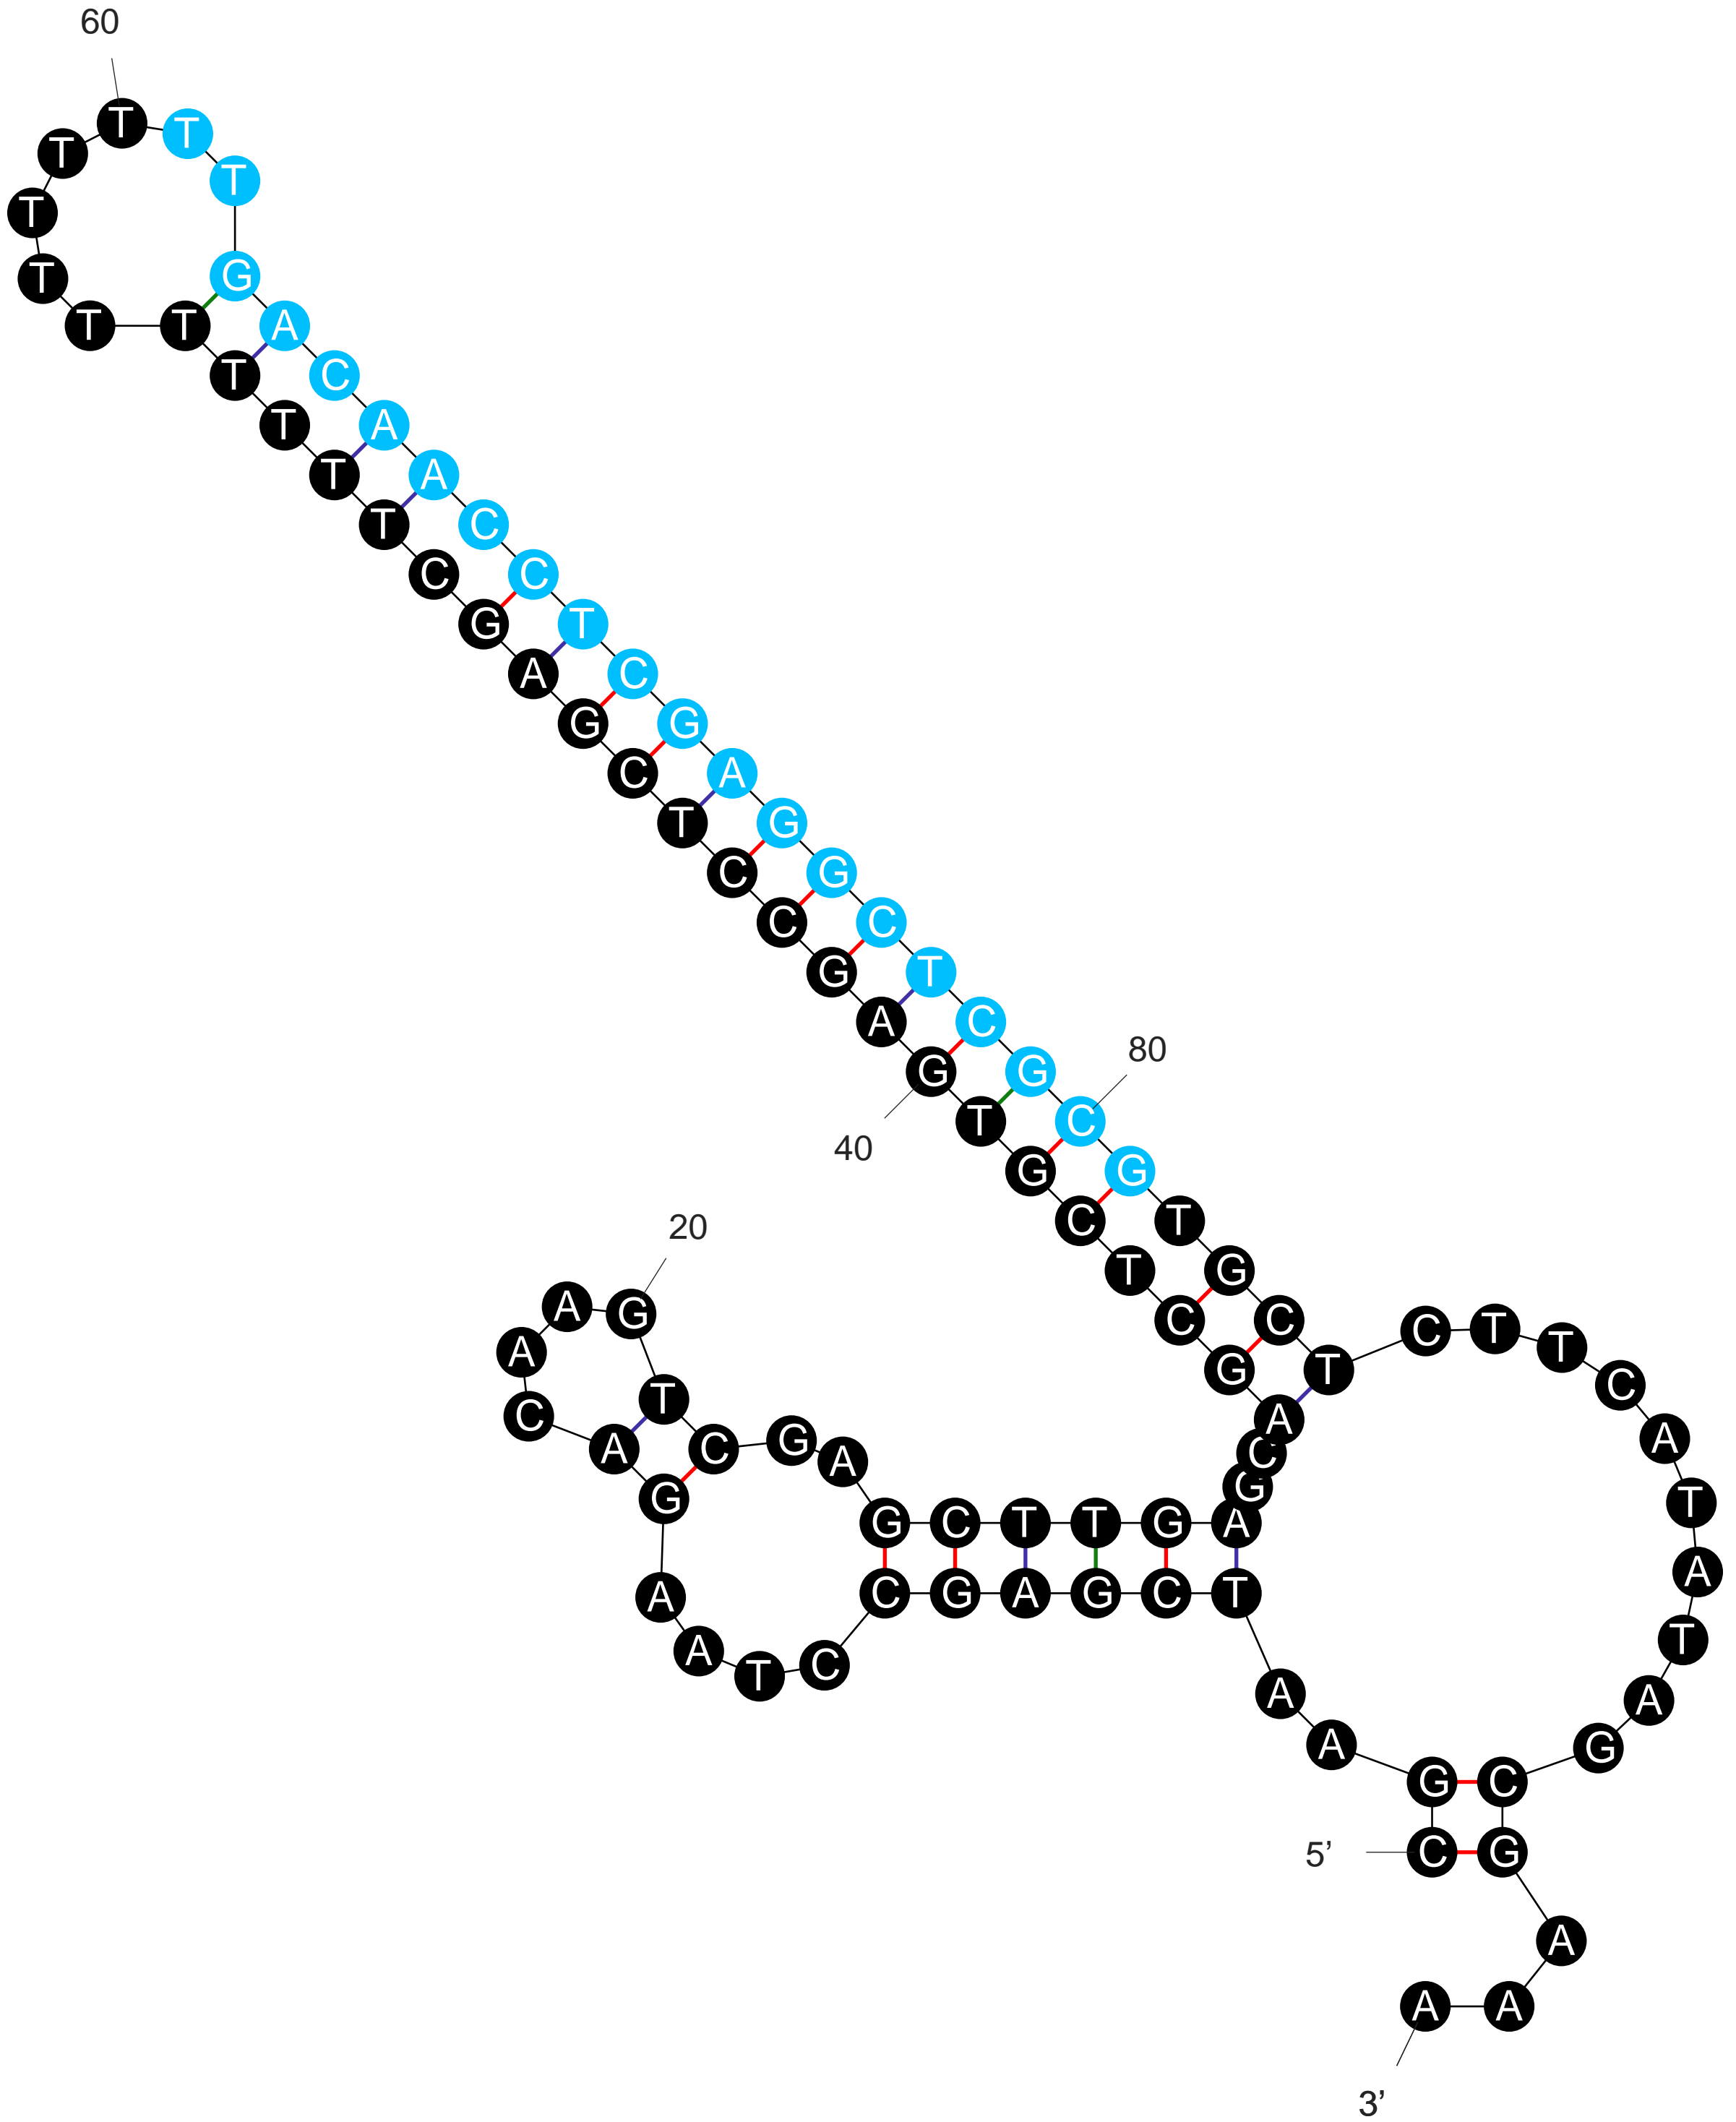

$dG = -36.60$  osa-cand033

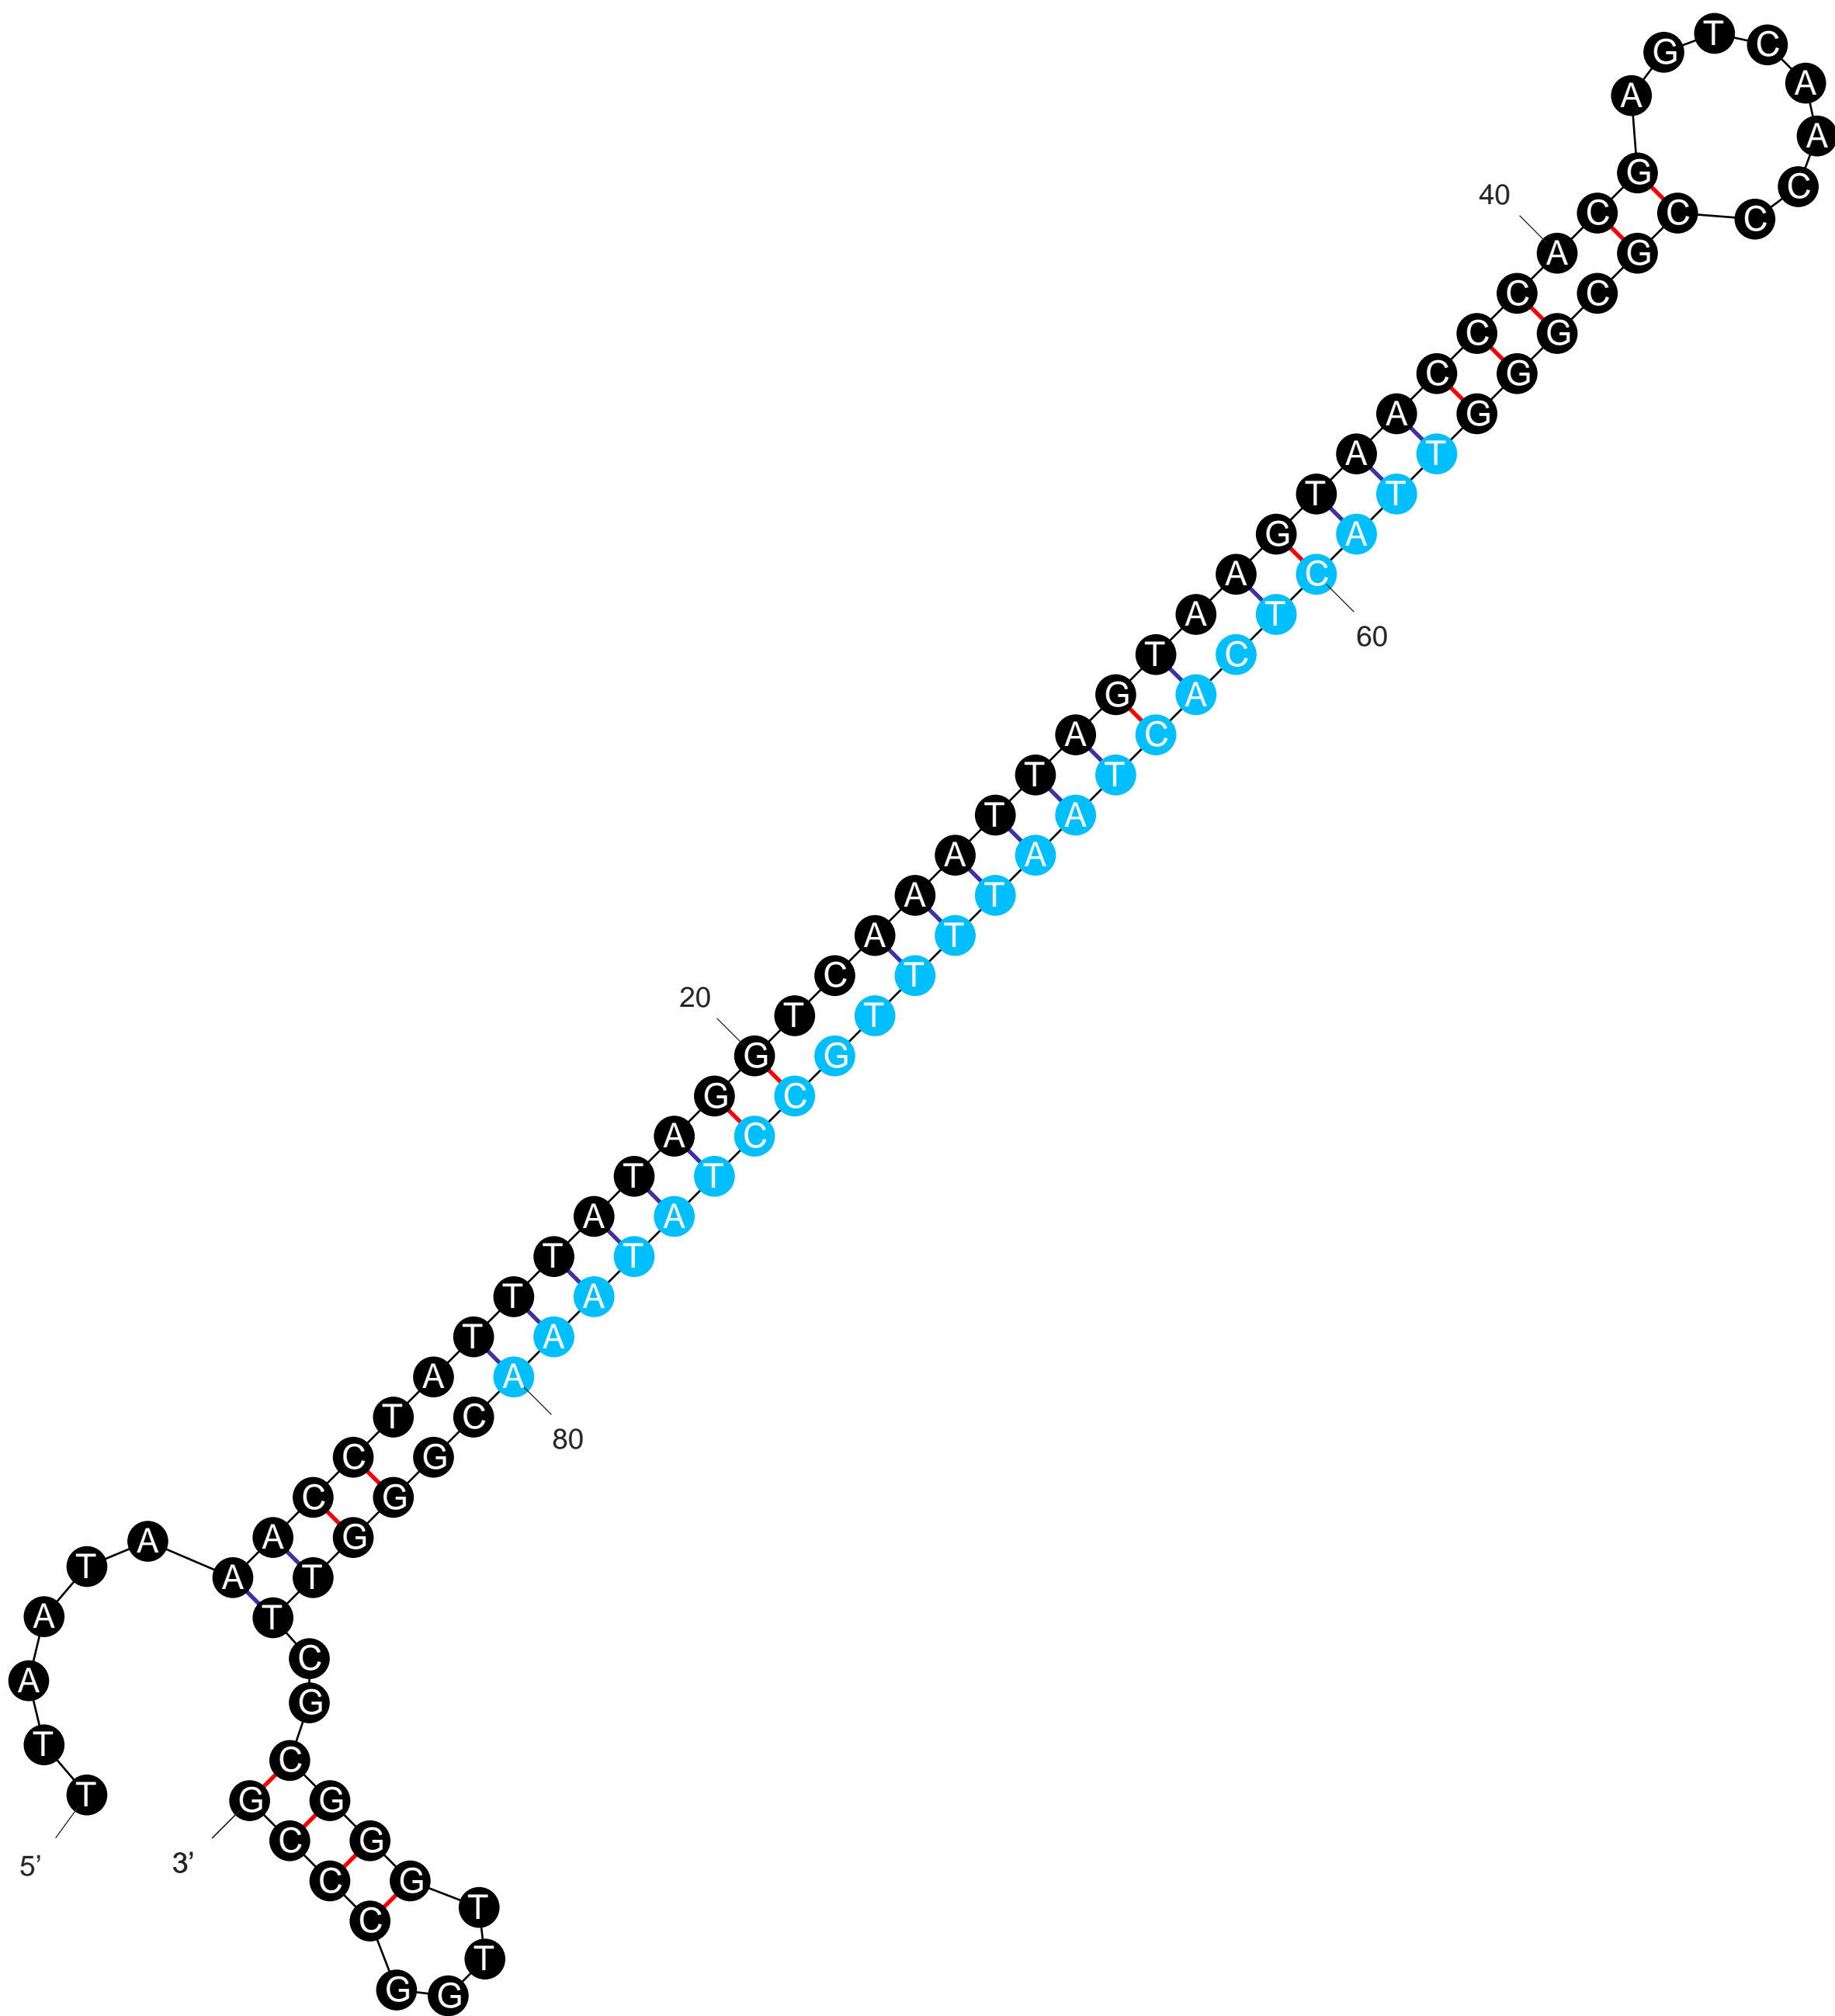

$dG = -45.90$  osa-cand034

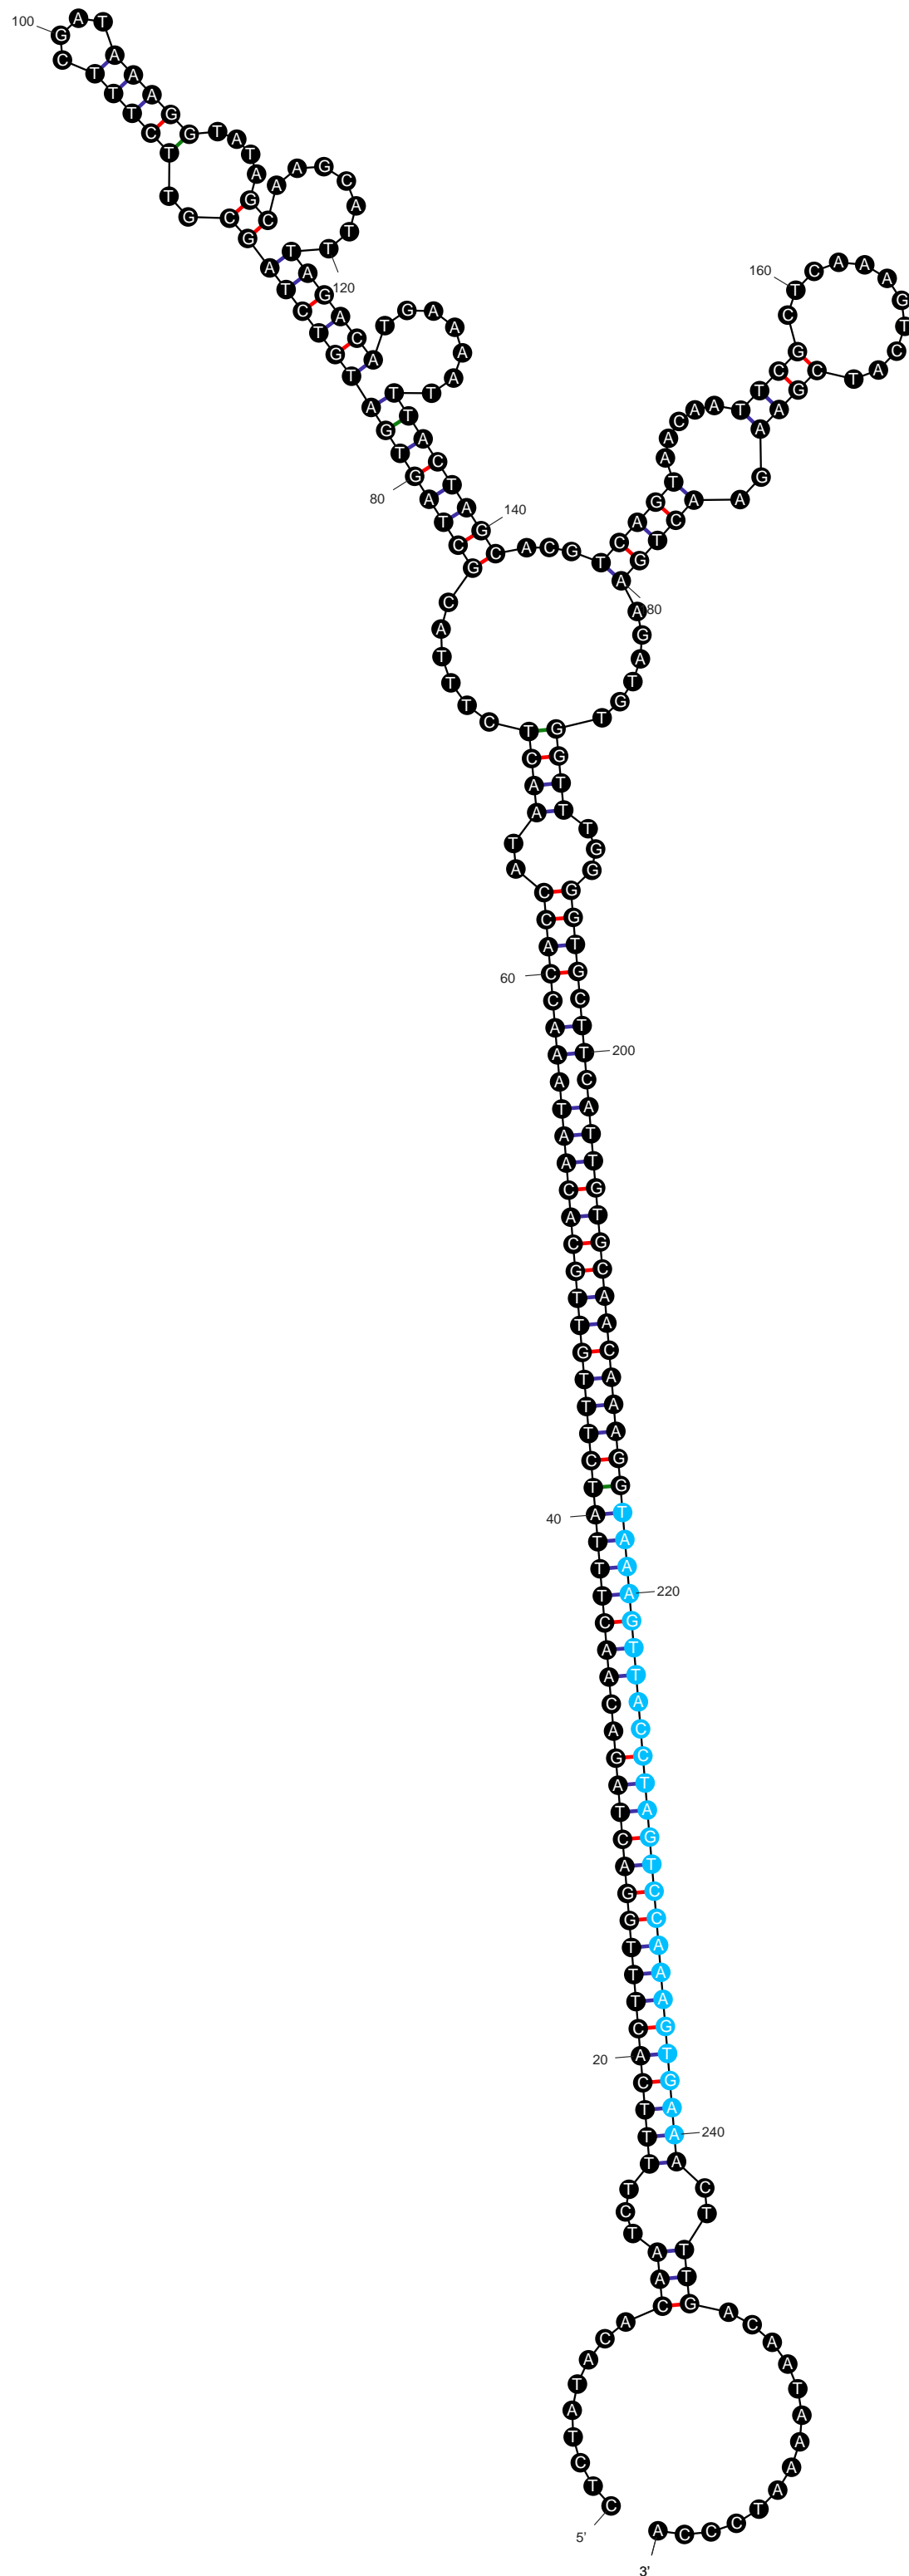

$dG = -87.00$  osa-cand035a

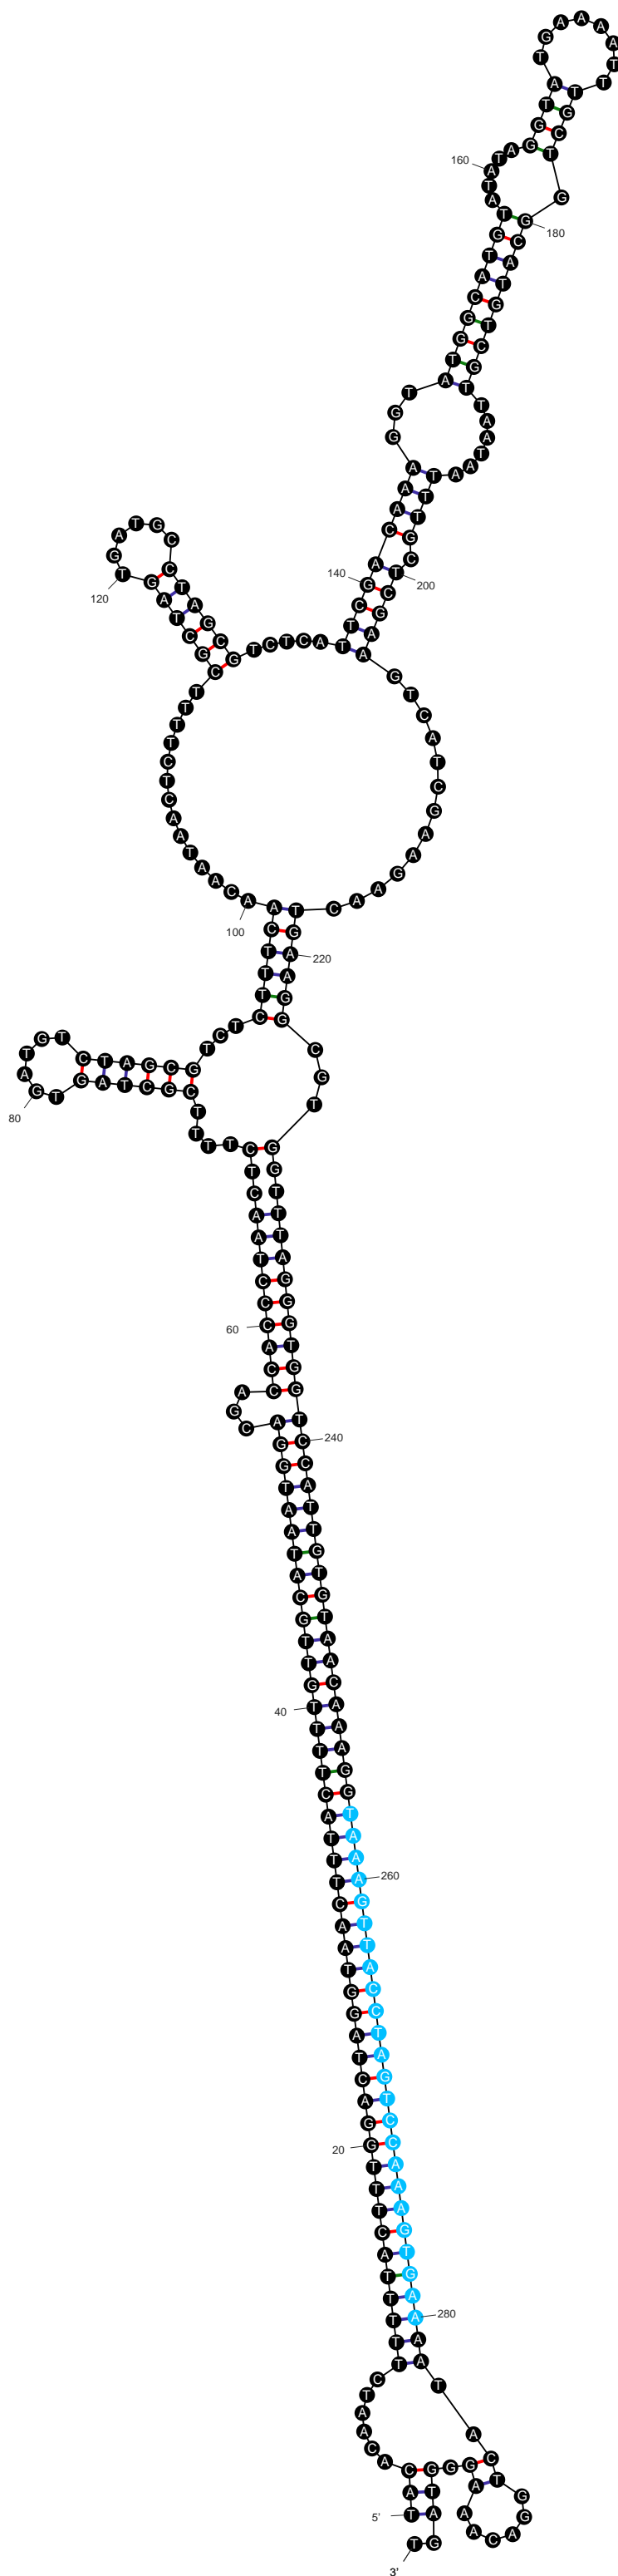

$dG = -121.30$  osa-cand035b



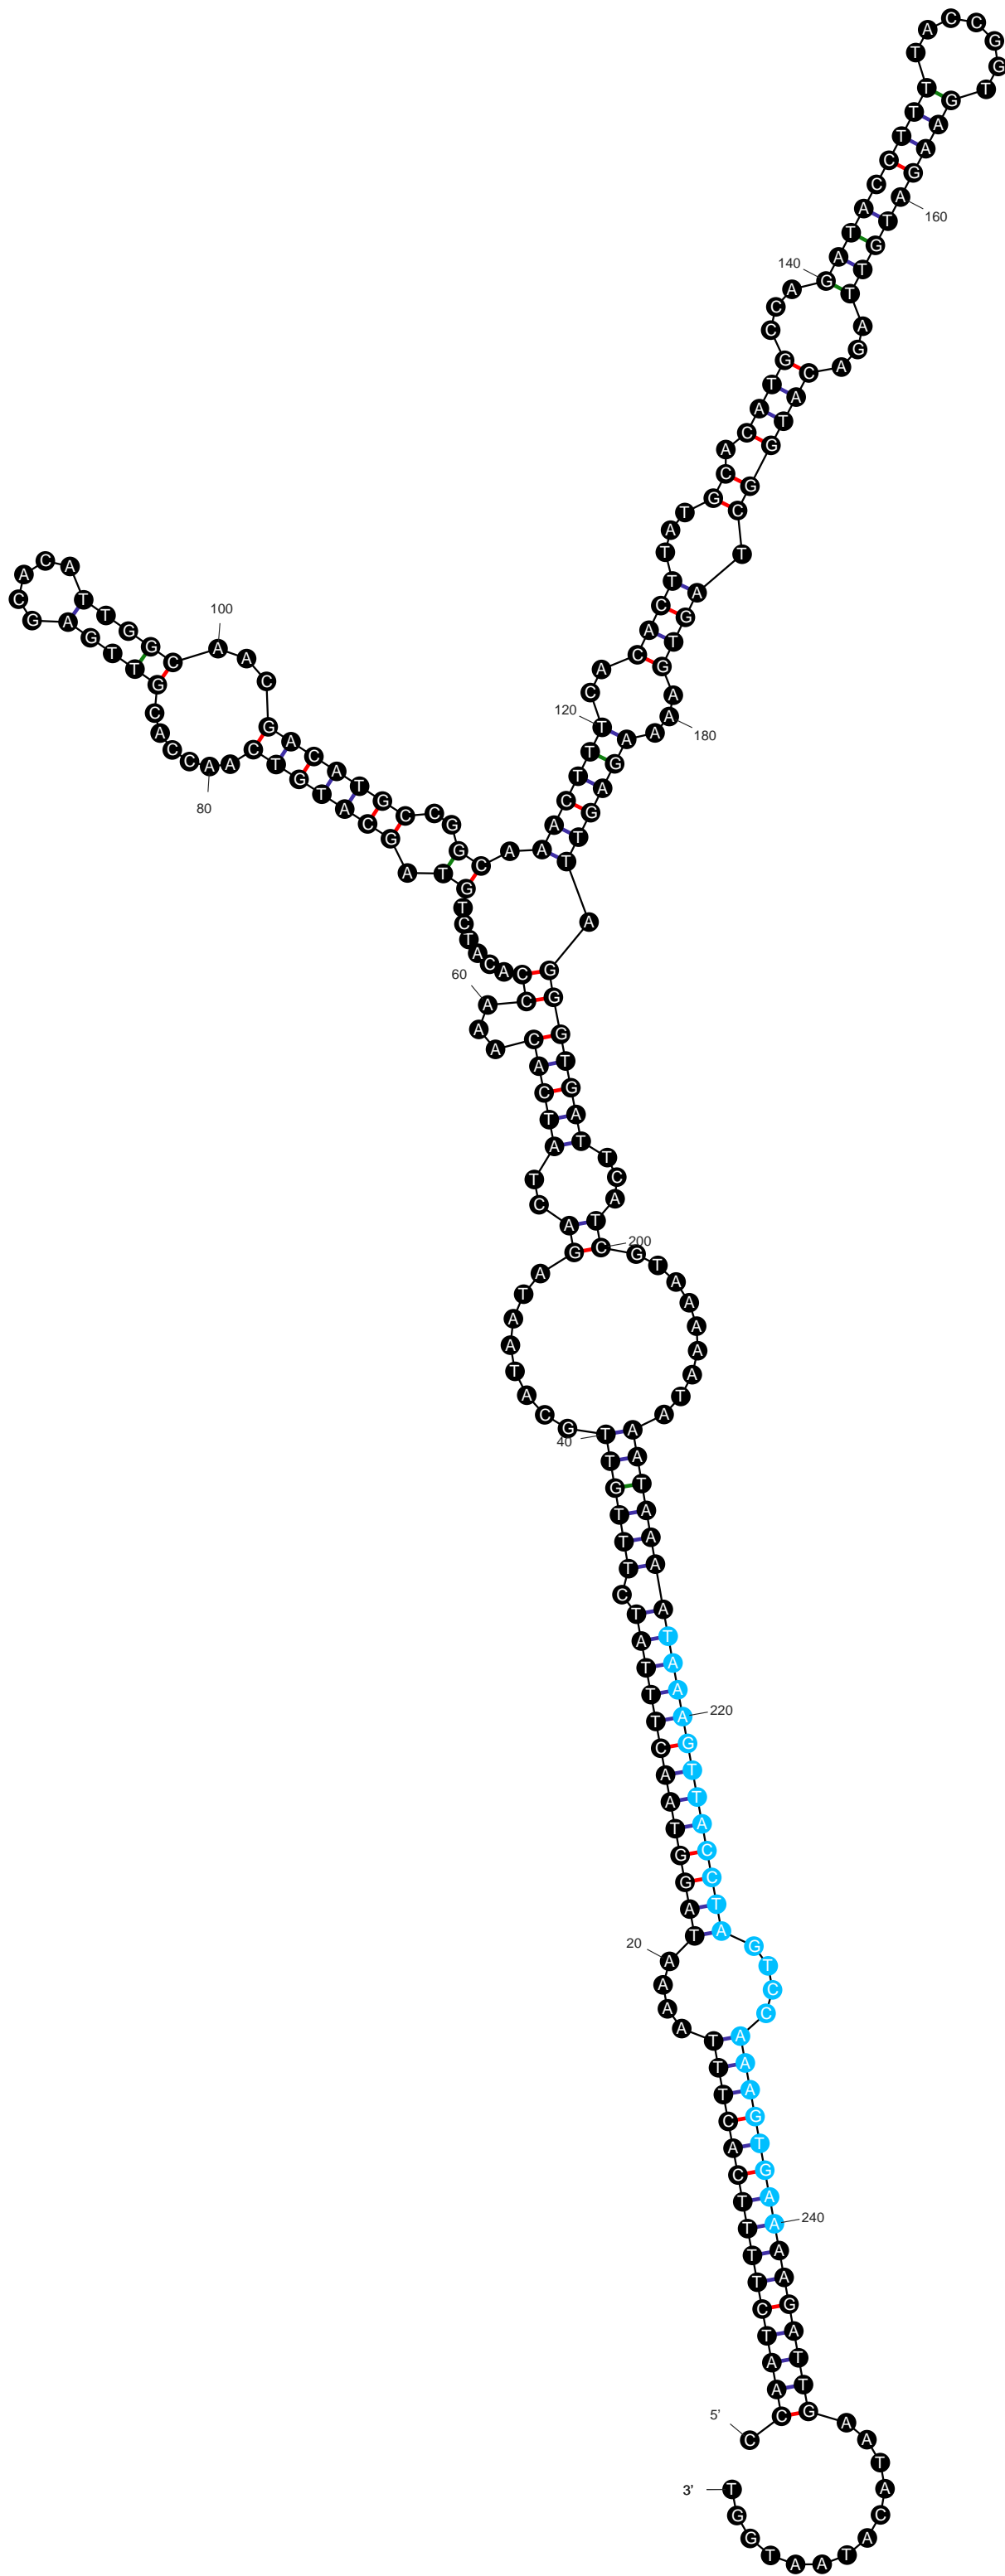

$dG = -71.60$  osa-cand035c

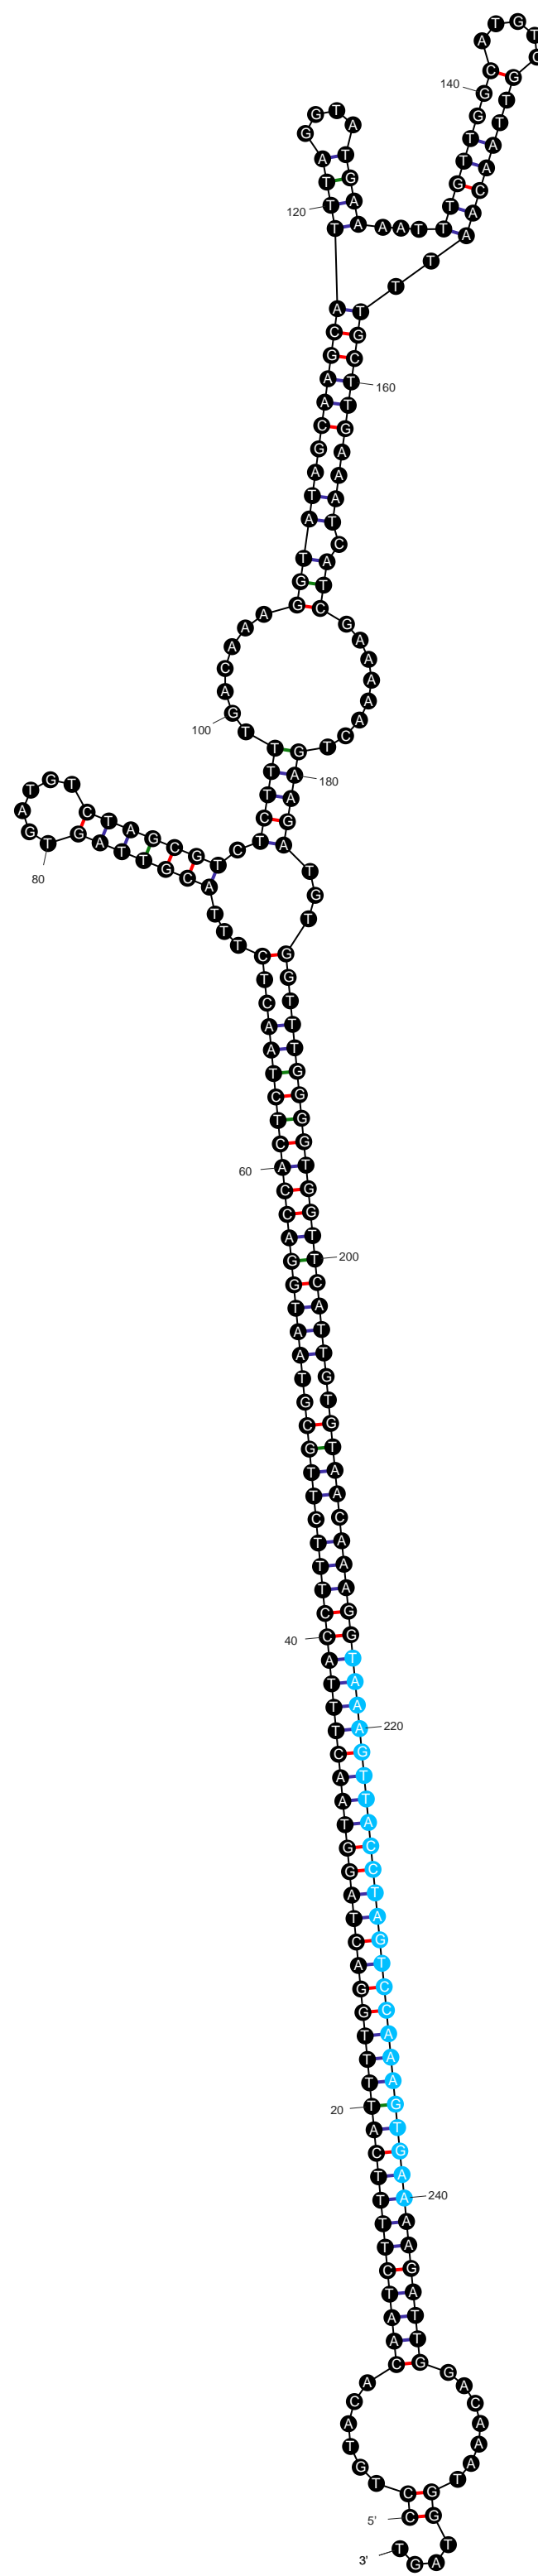

$dG = -108.20$  osa-cand035d

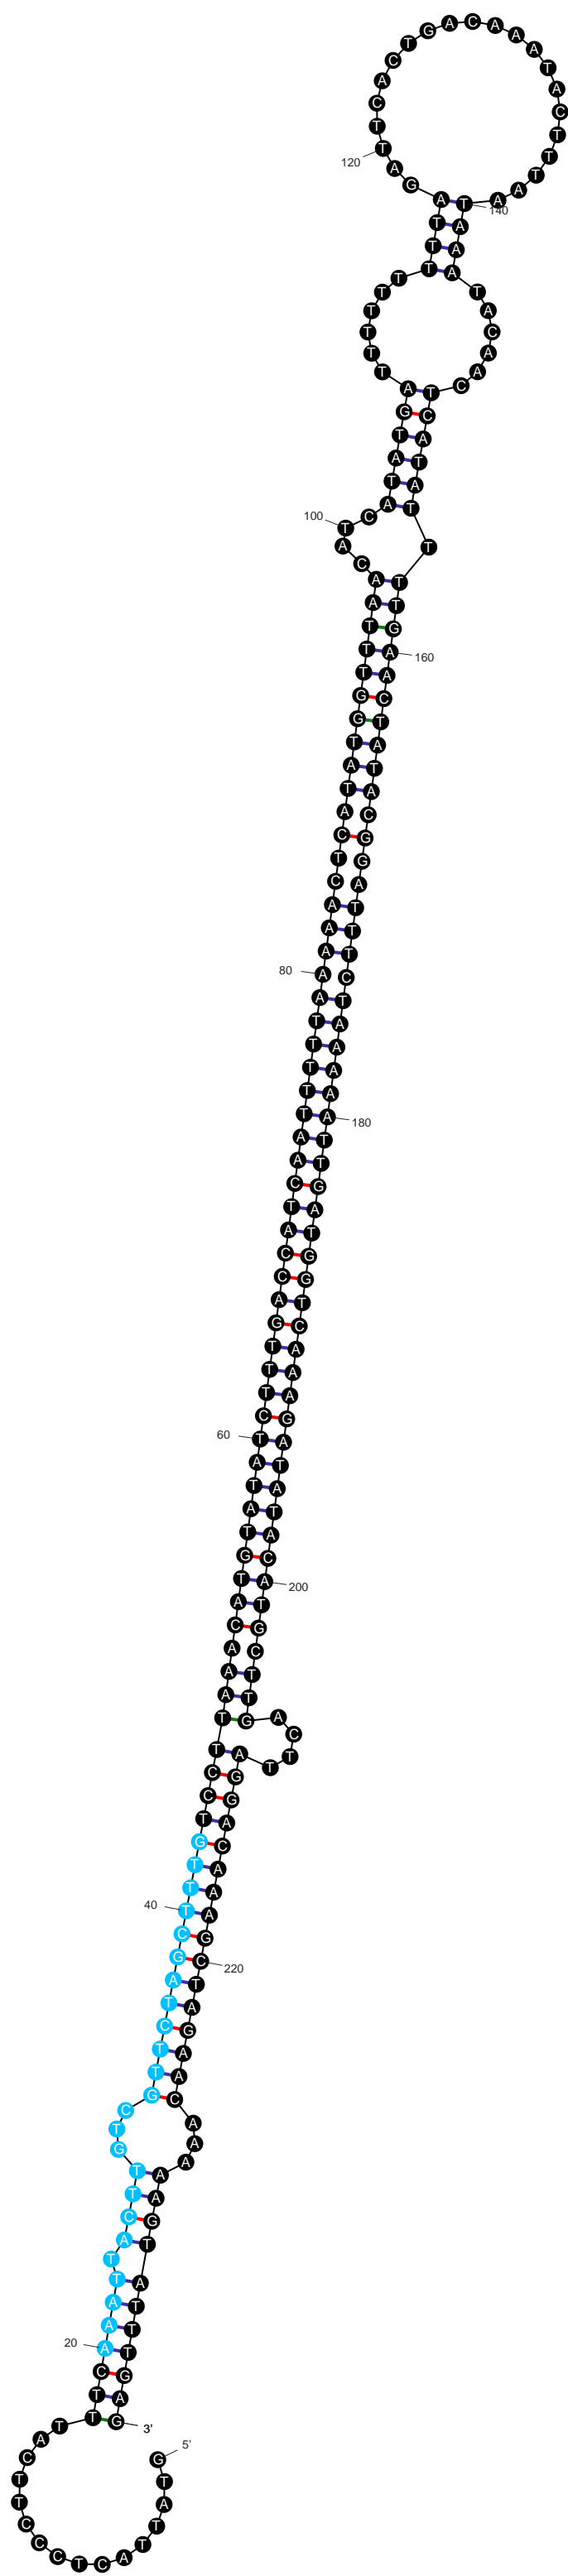

$dG = -87.10$  osa-cand036

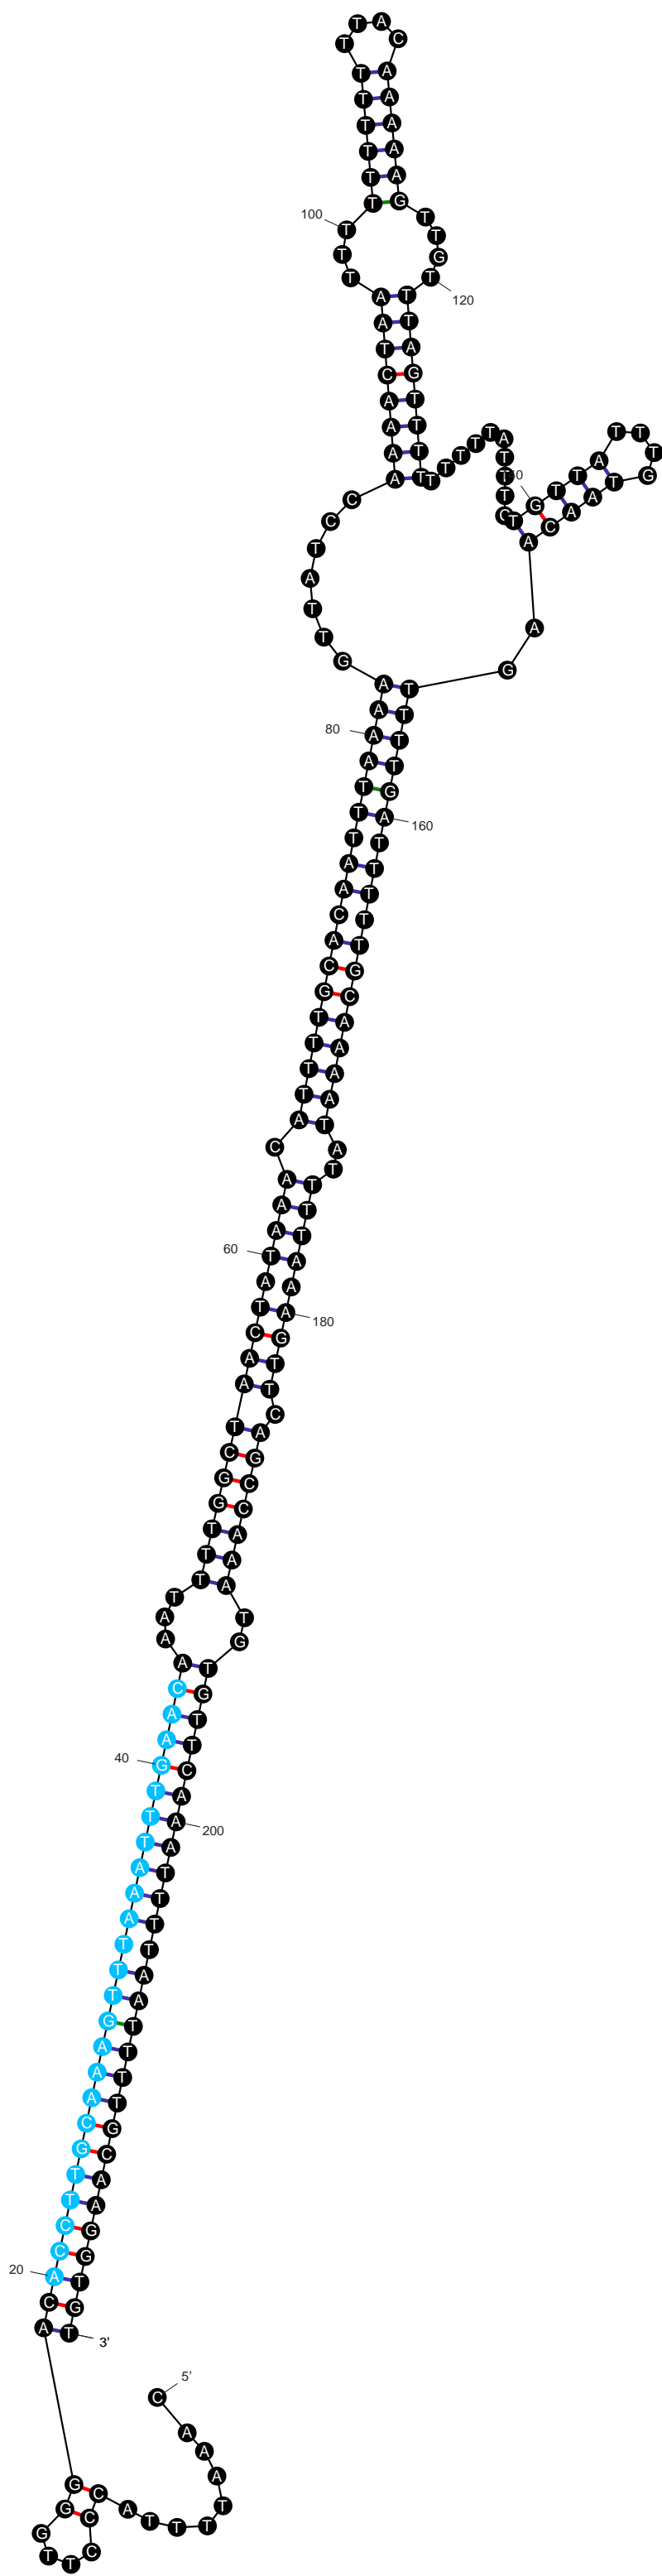

$dG = -66.90$  osa-cand037

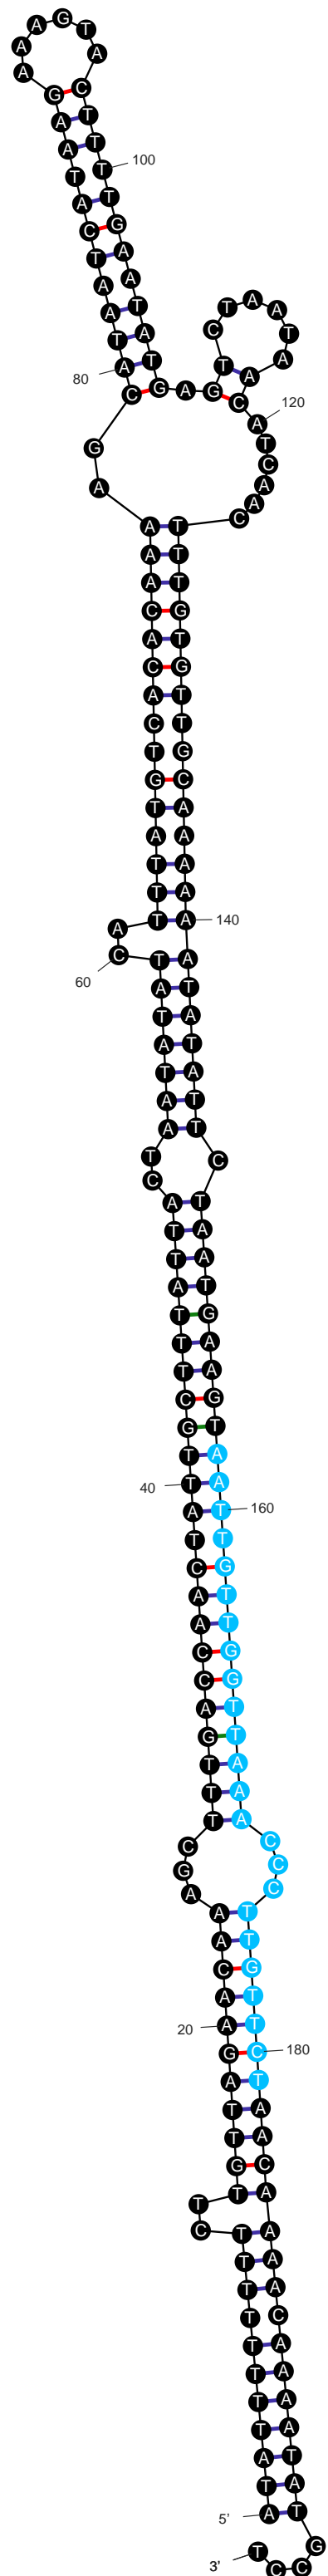

$dG = -56.50$  osa-cand038

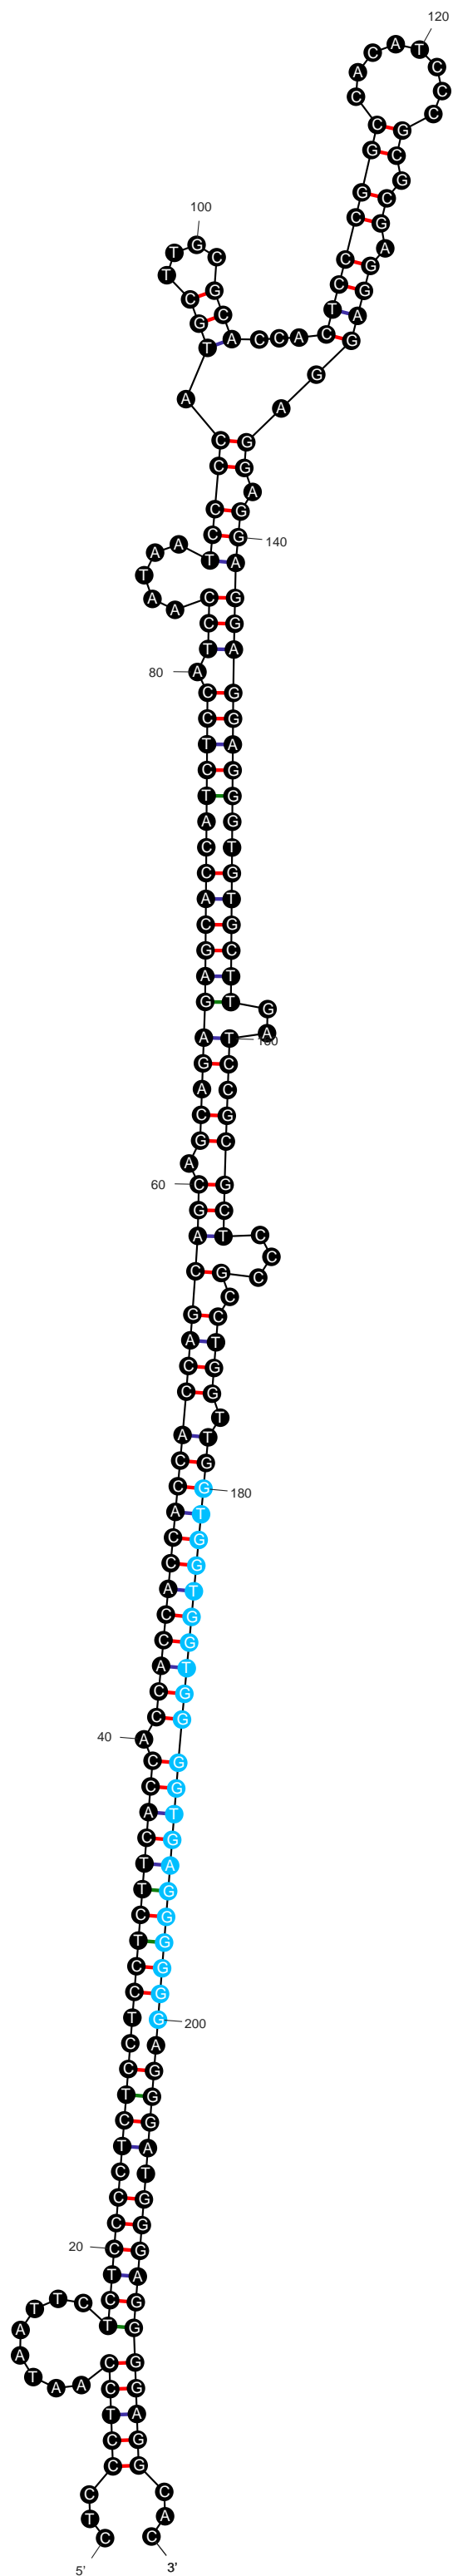

$dG = -114.90$  osa-cand039

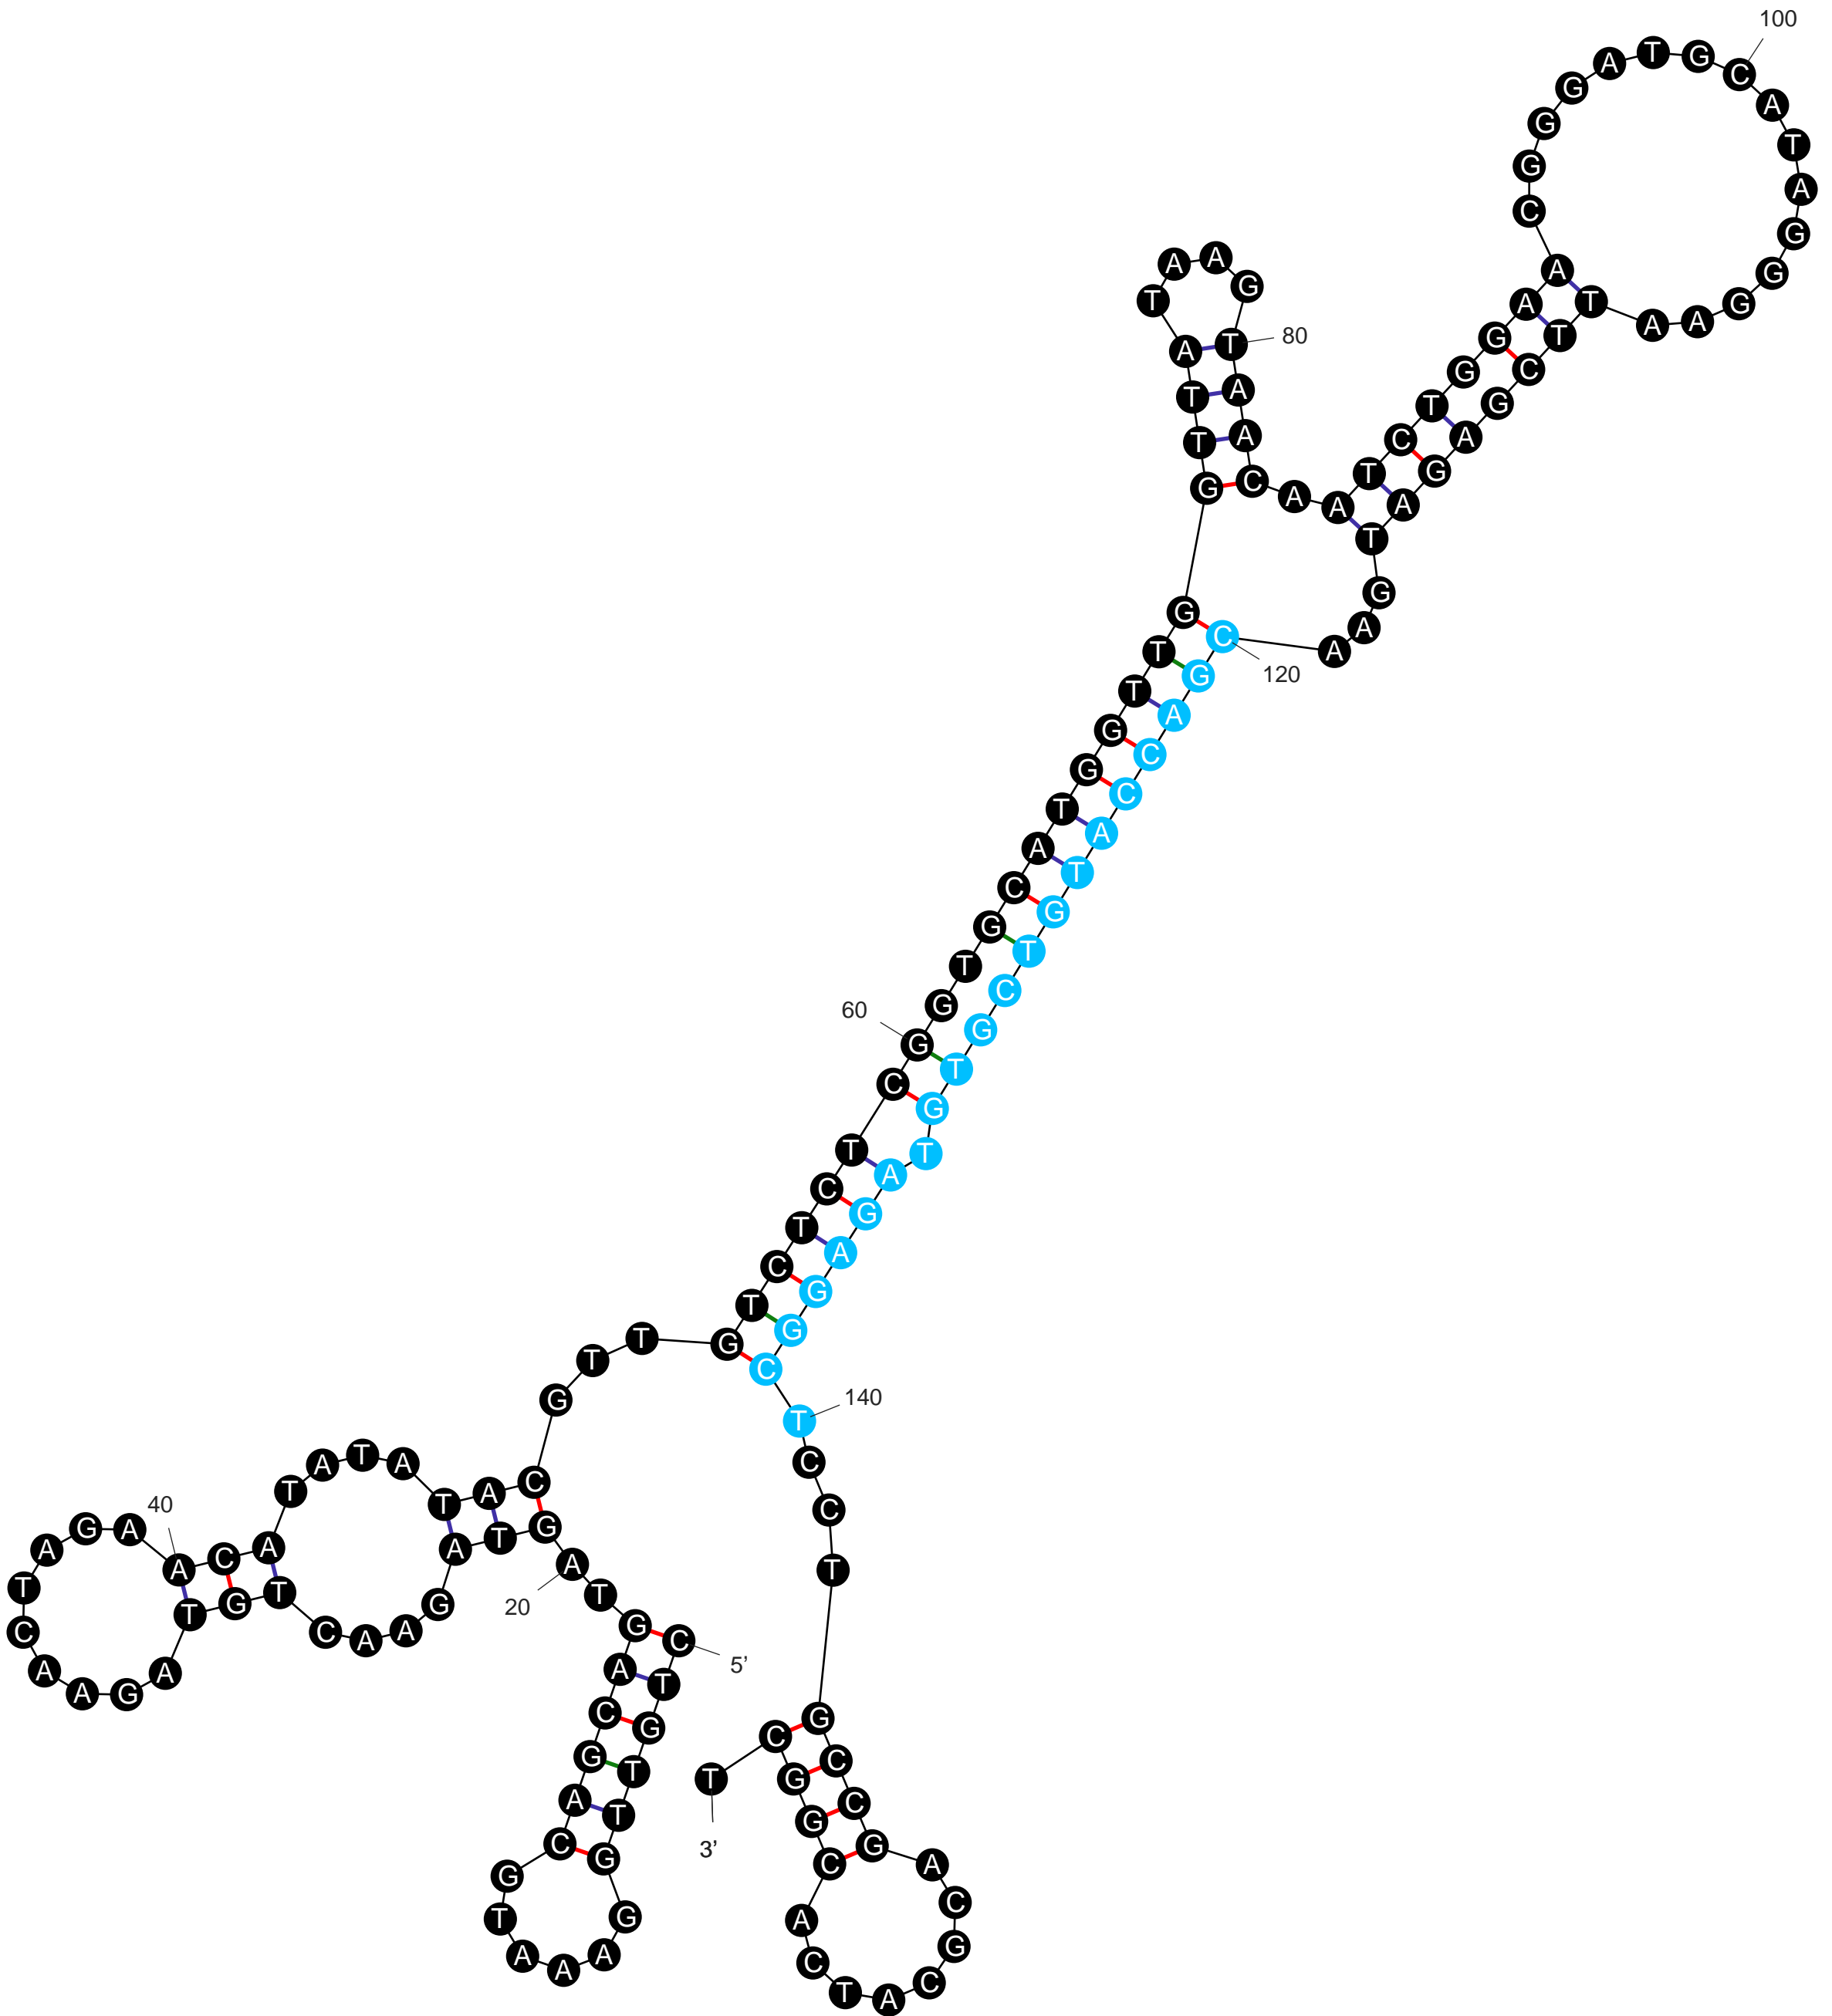

$dG = -38.40$  osa-cand040

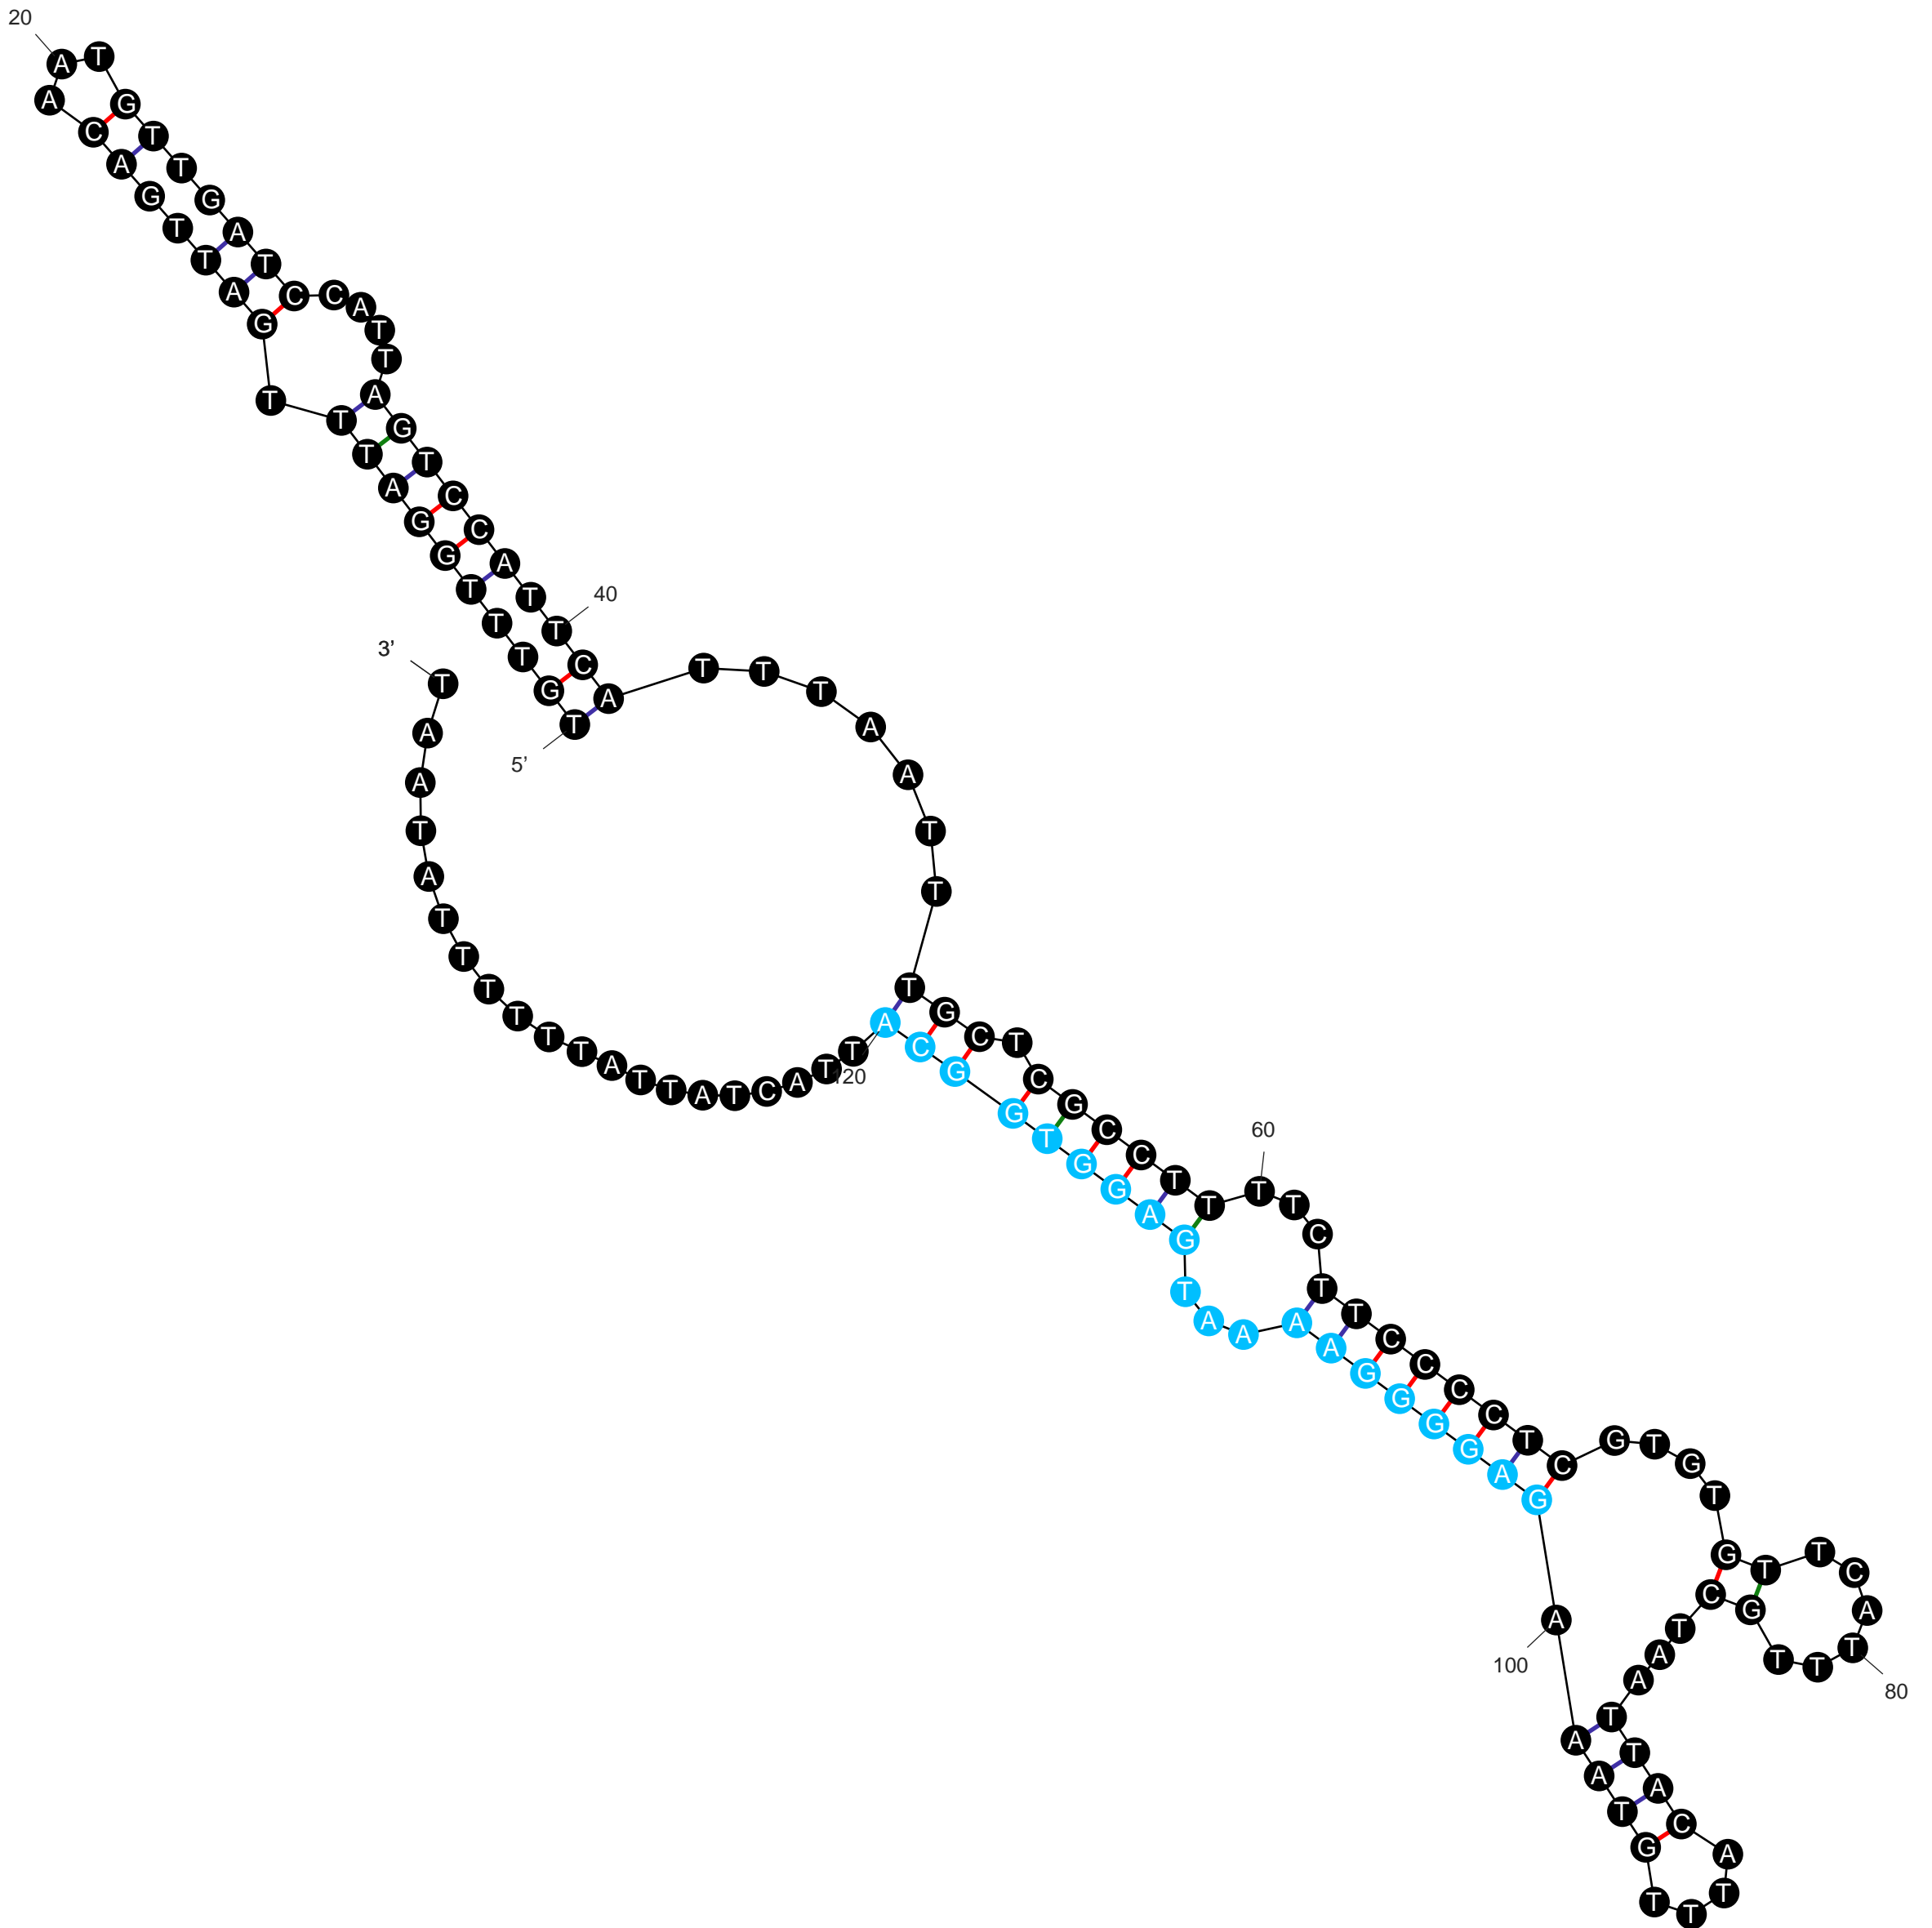

$dG = -38.90$  osa-cand041



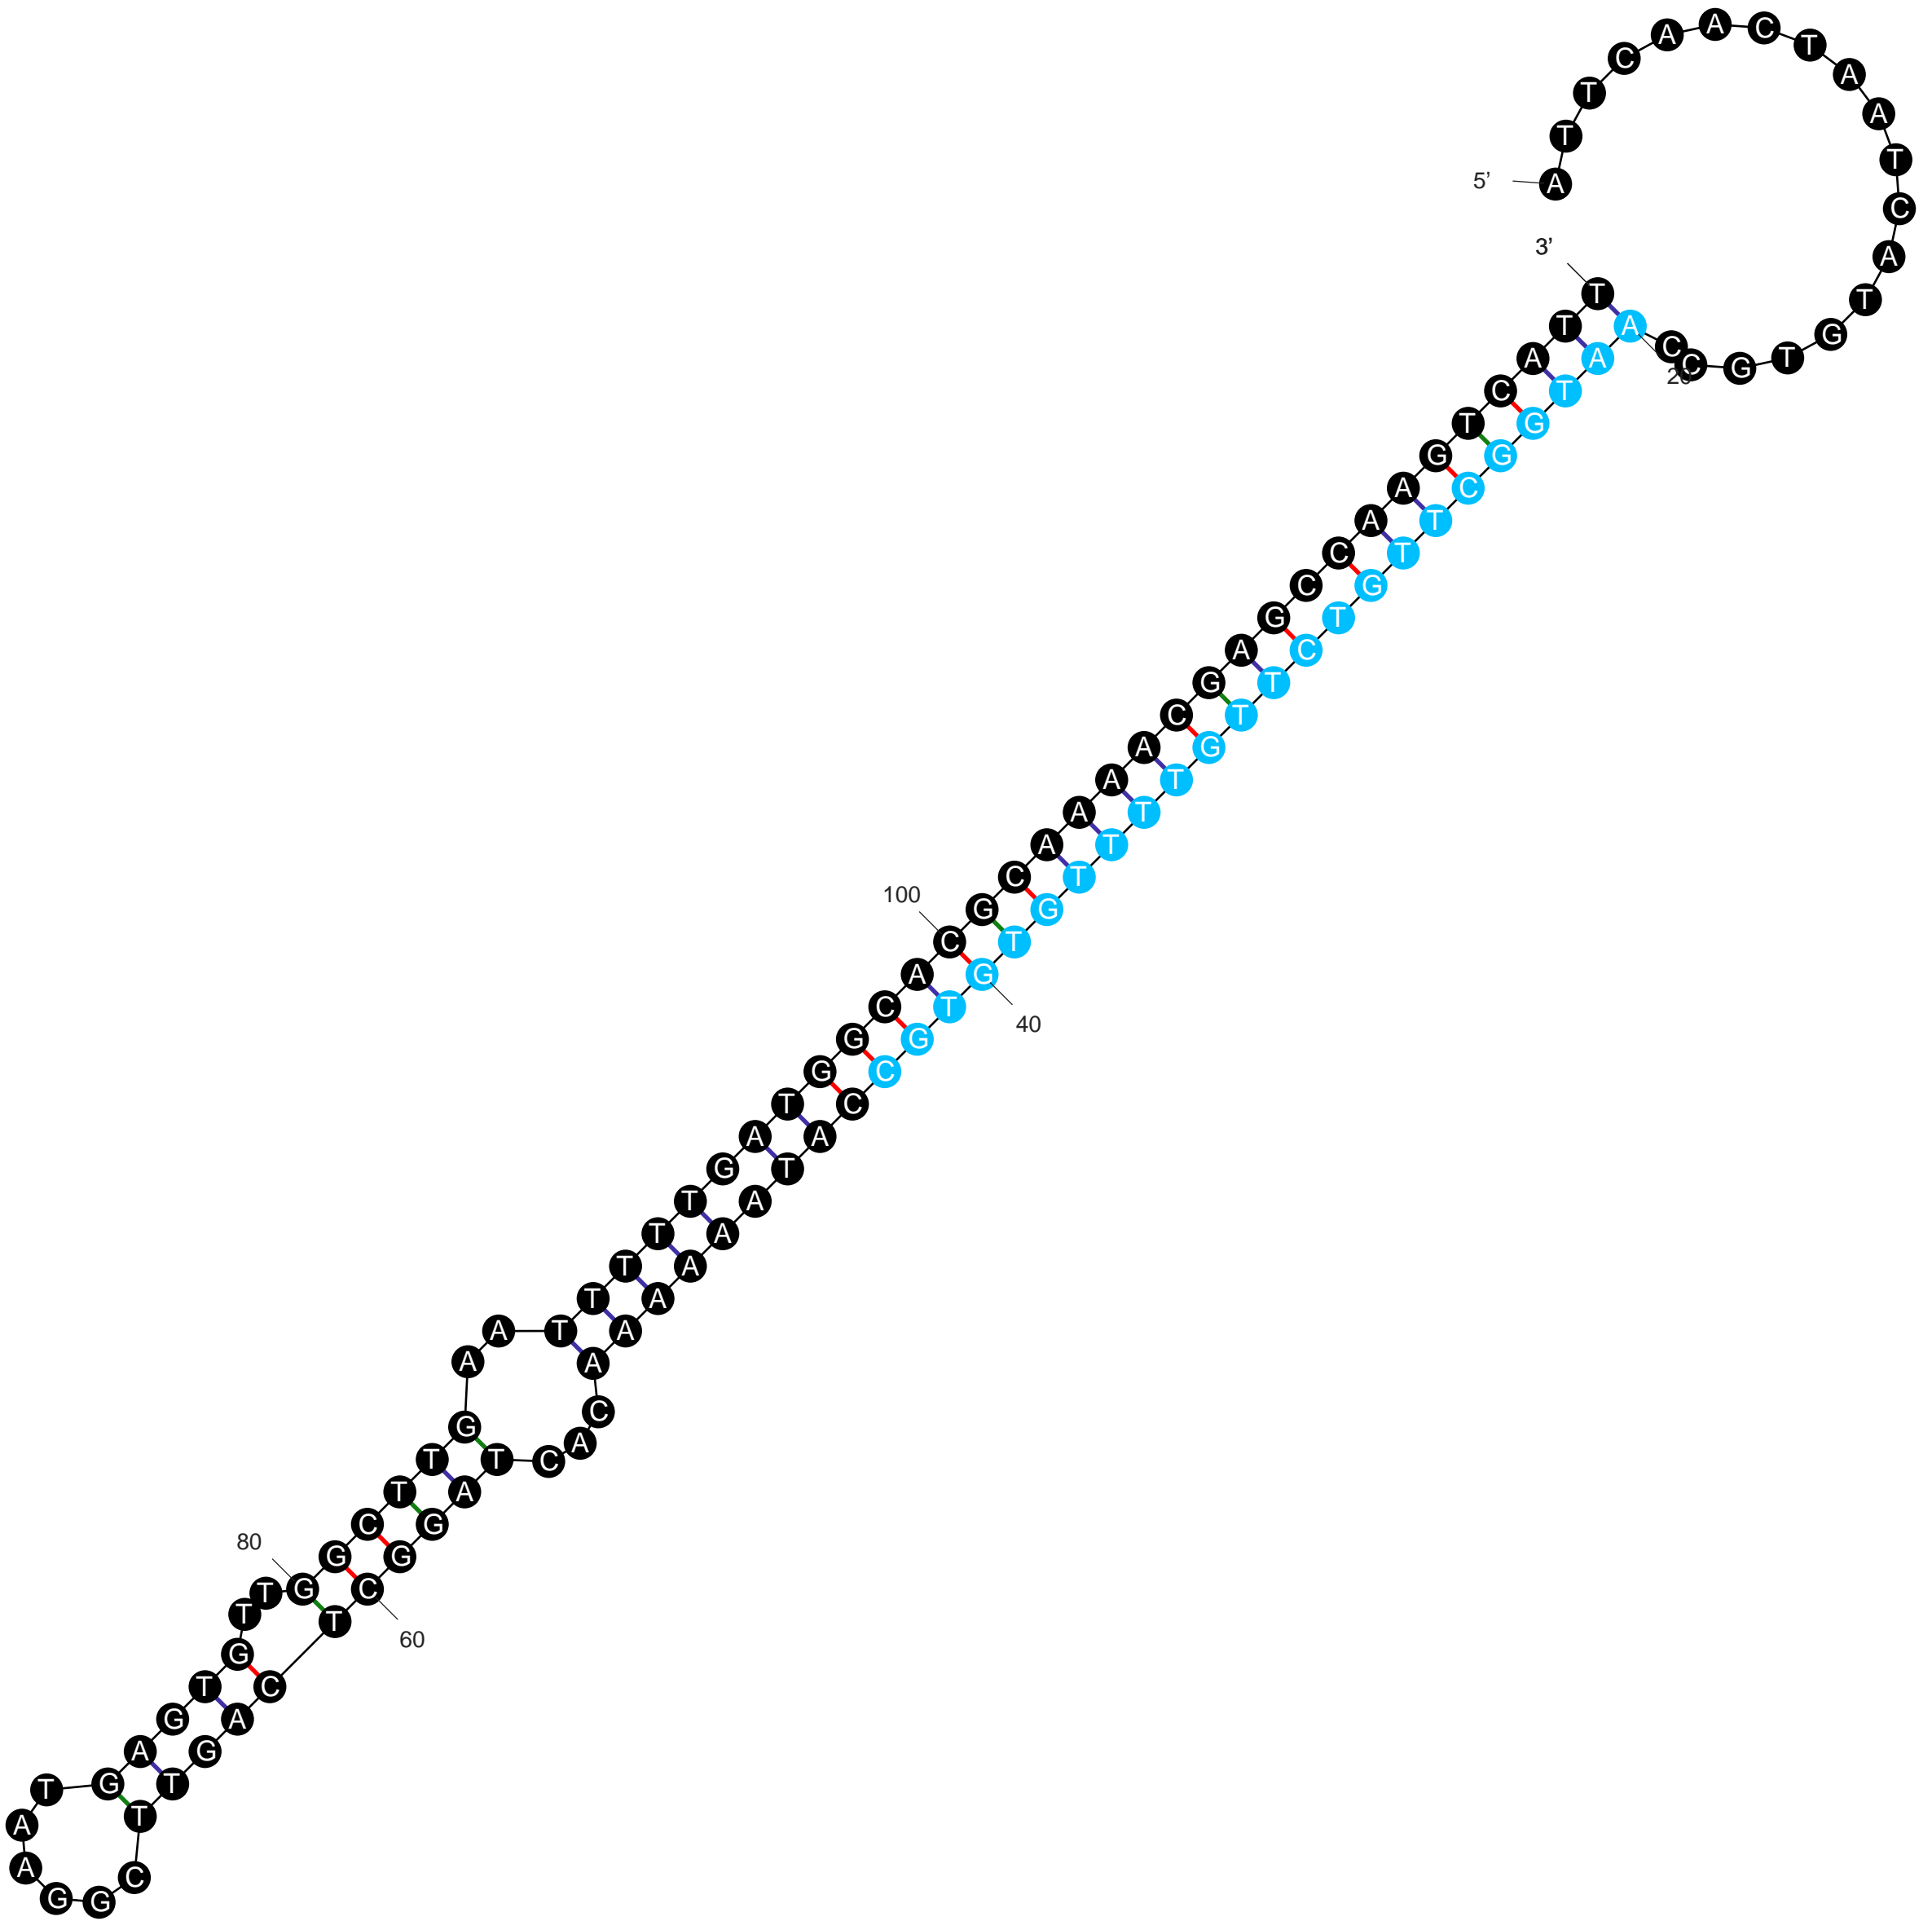

$dG = -45.00$  osa-cand042

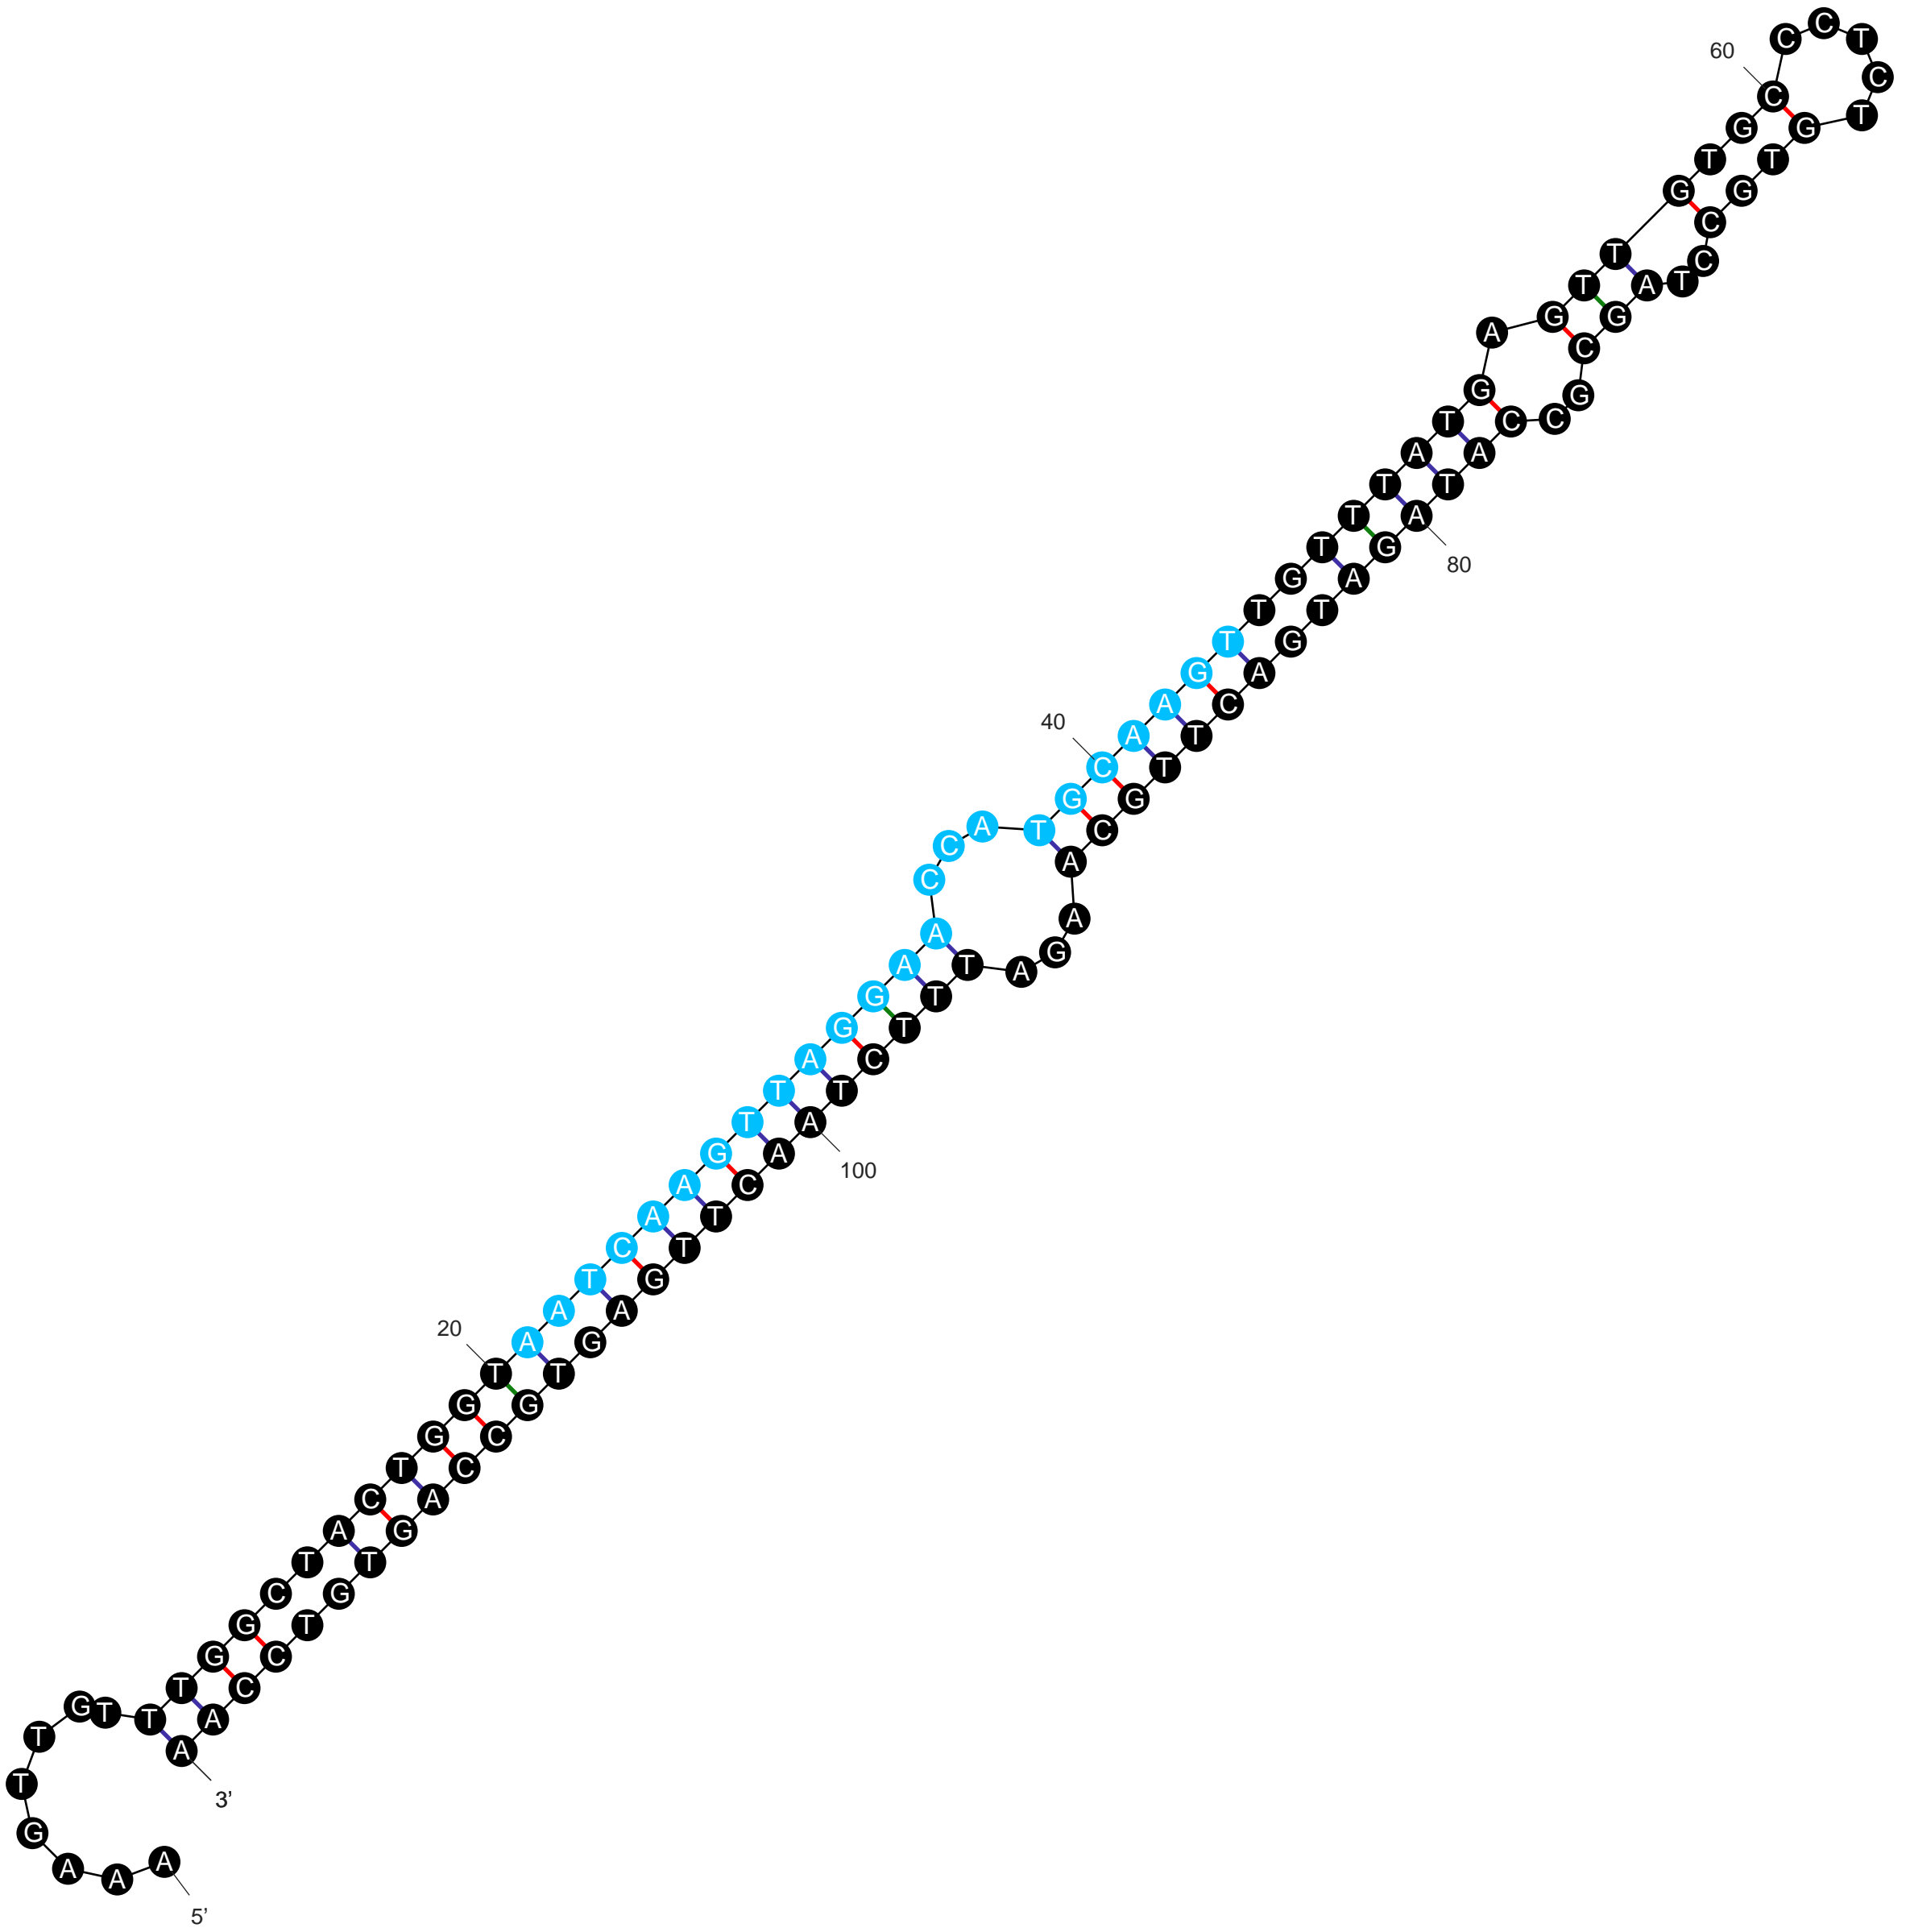

$dG = -51.40$  osa-cand043

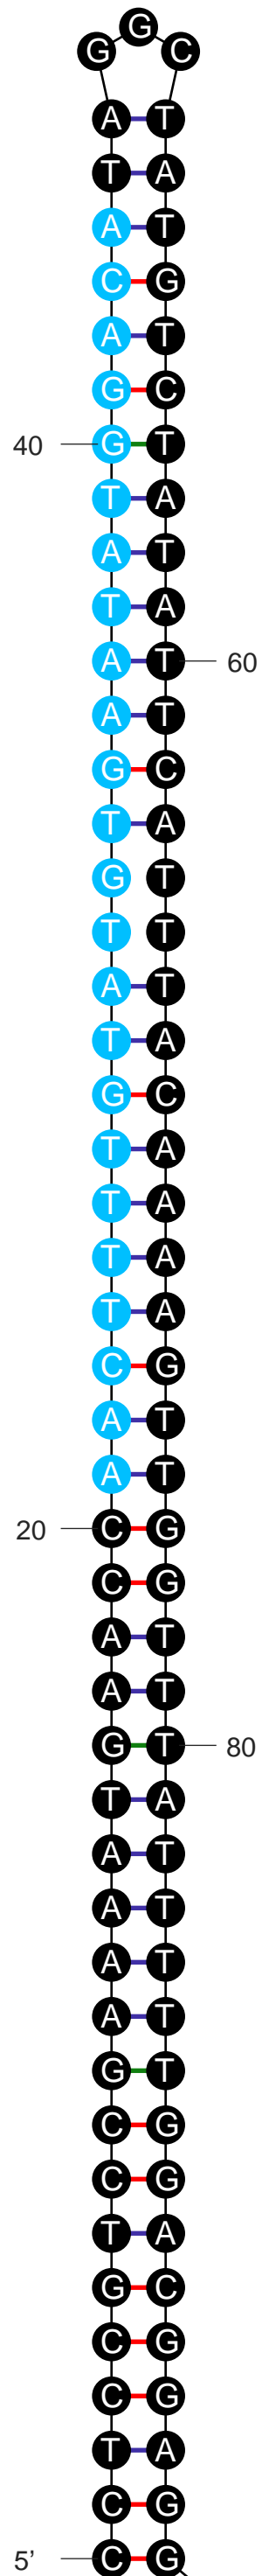

*dG = -67.10 osa-cand044*

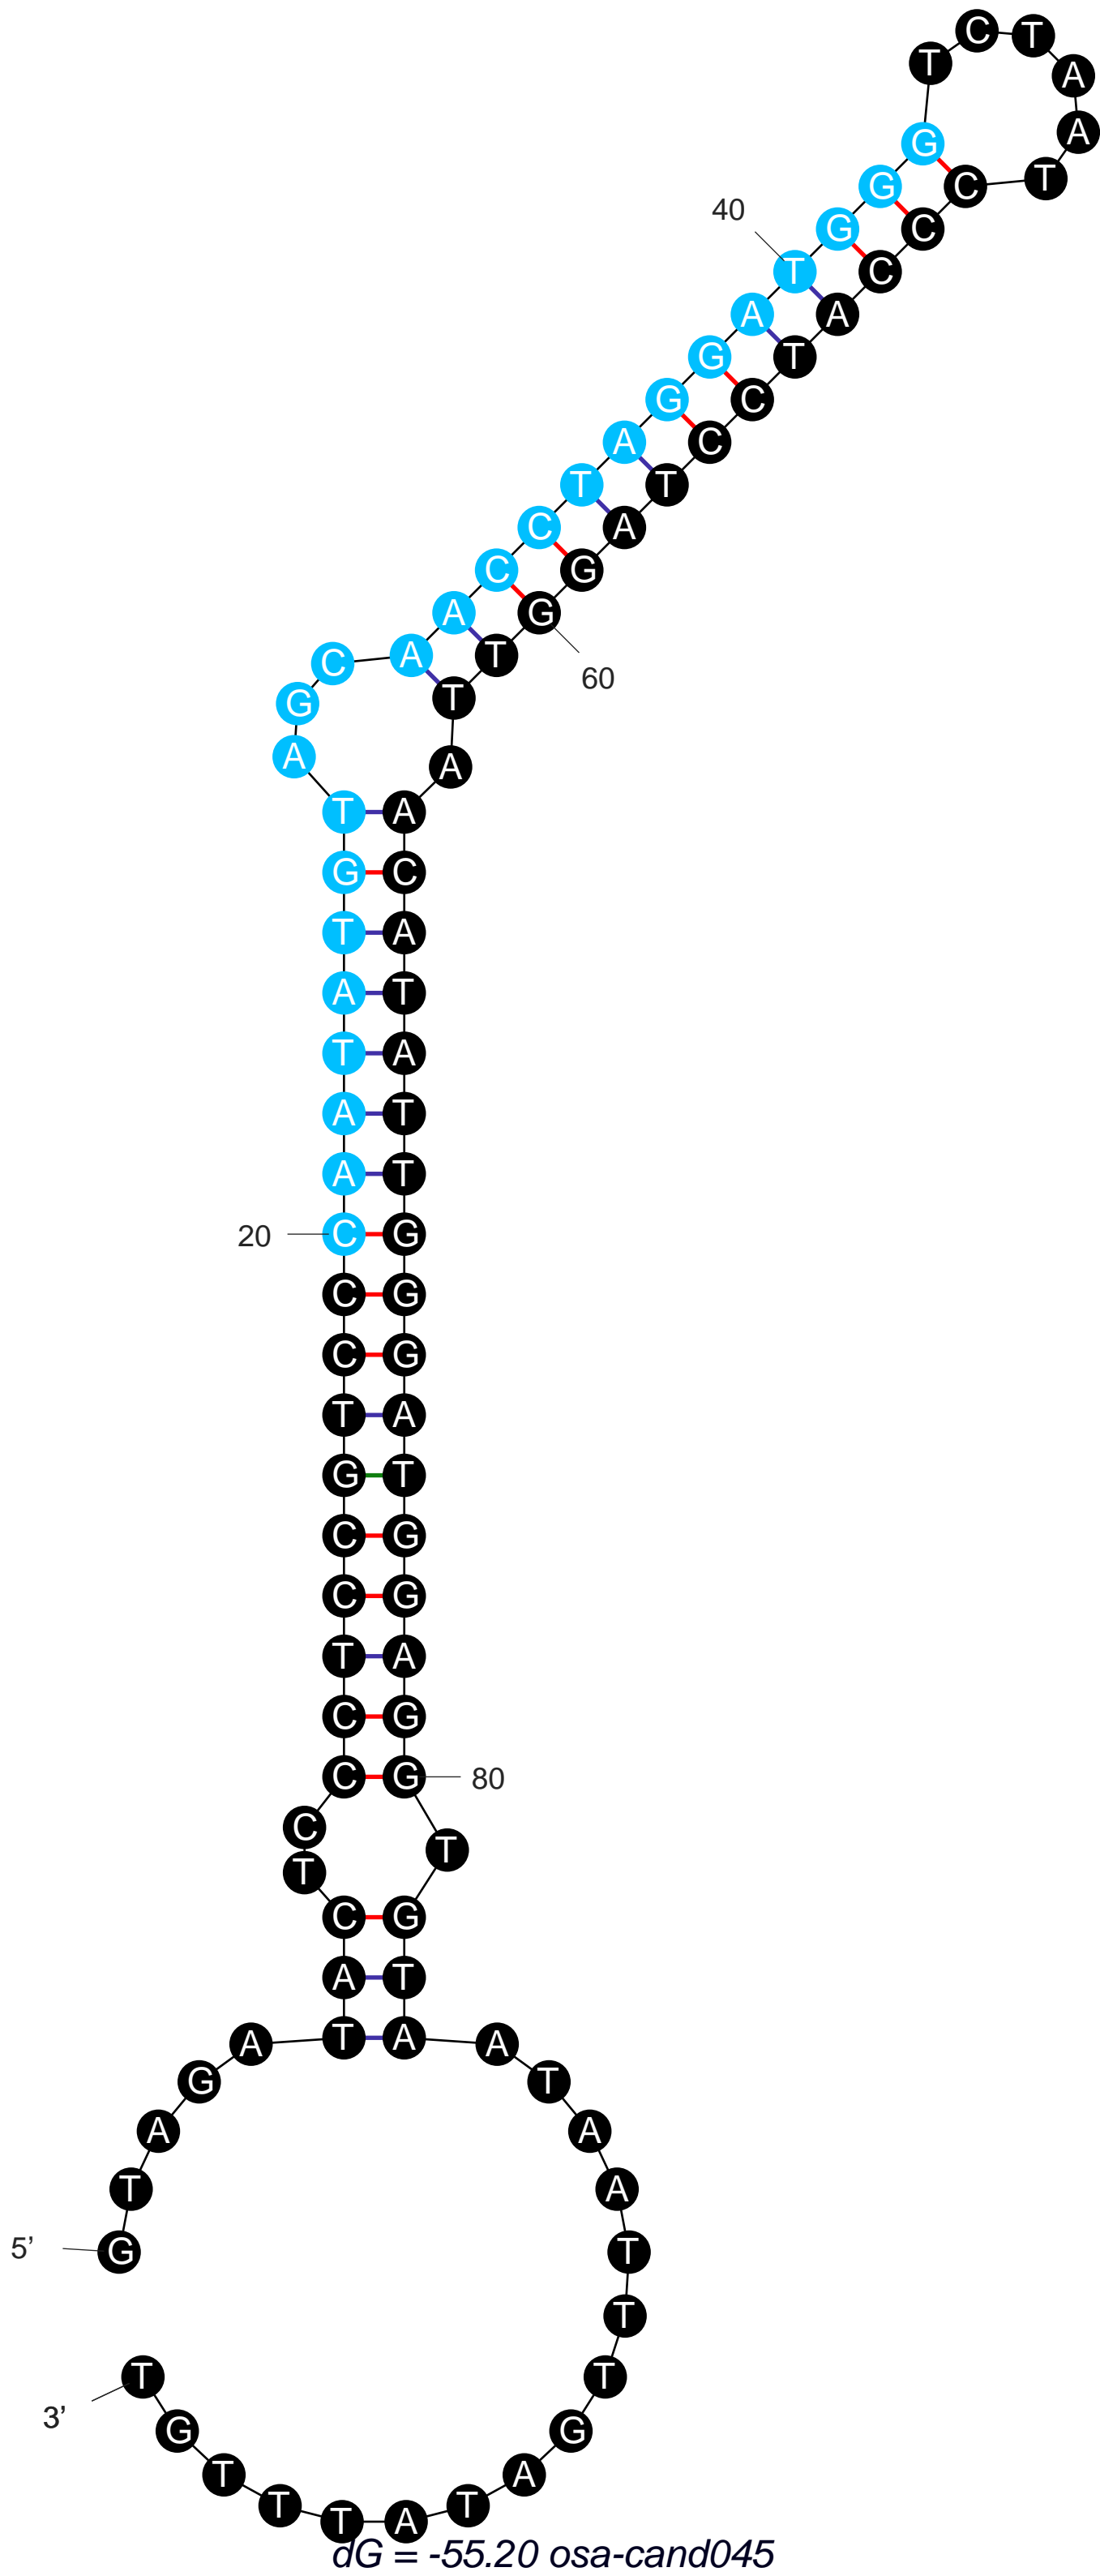

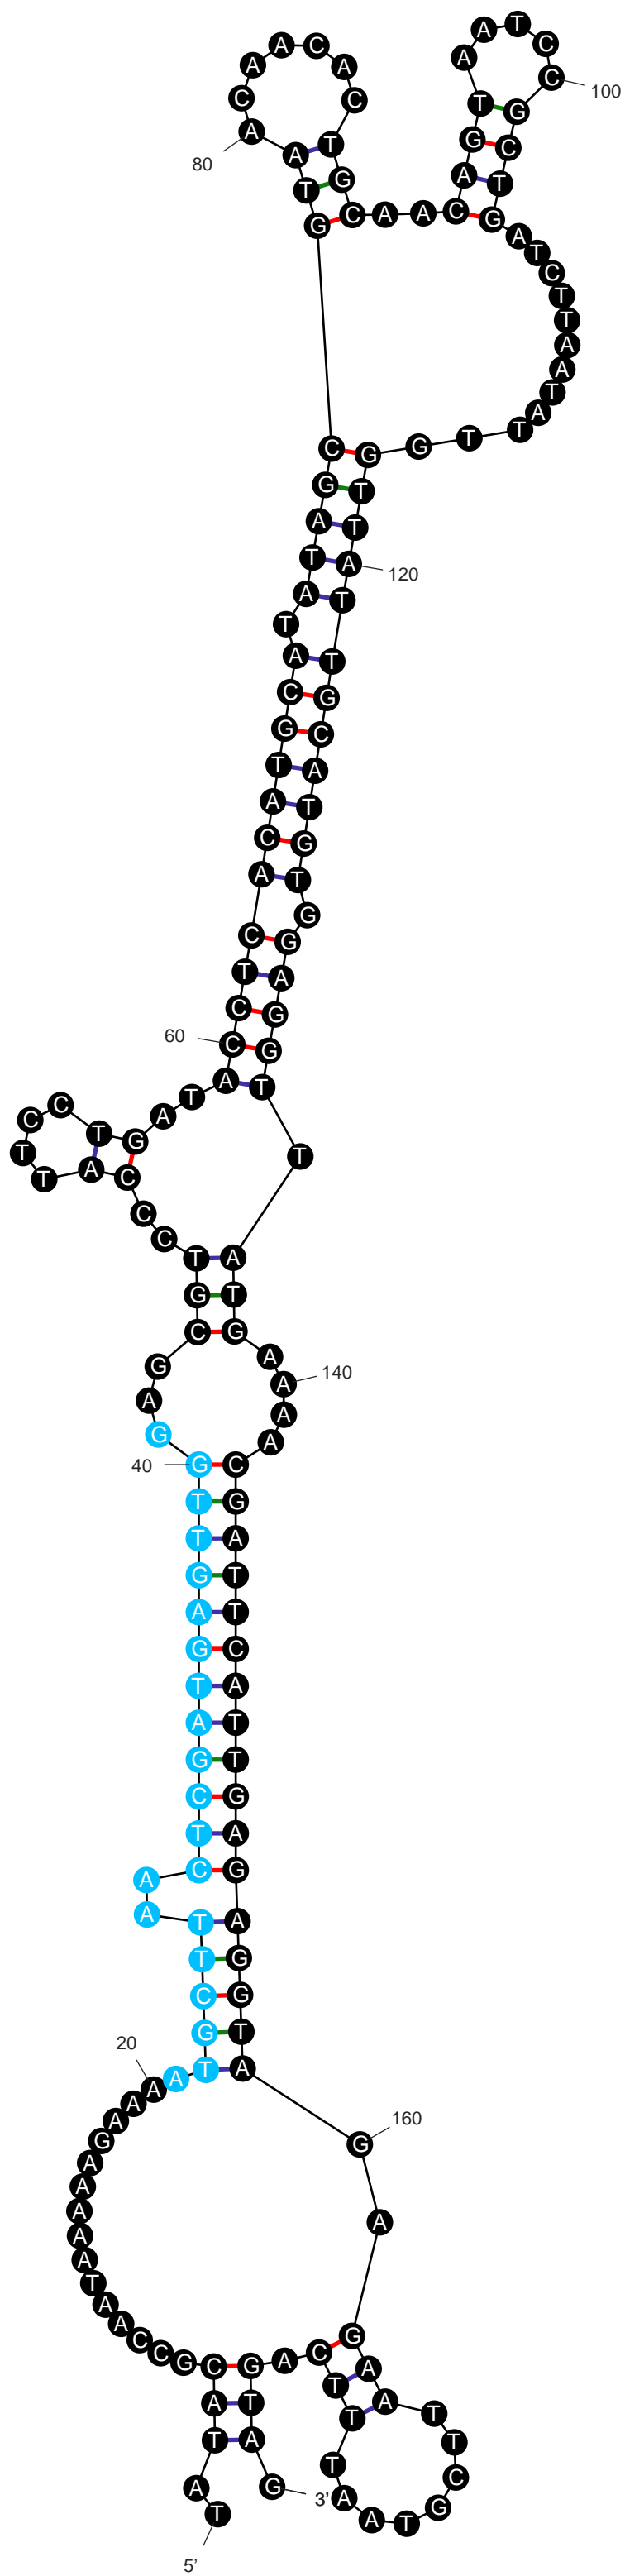

$dG = -39.40$  osa-cand046

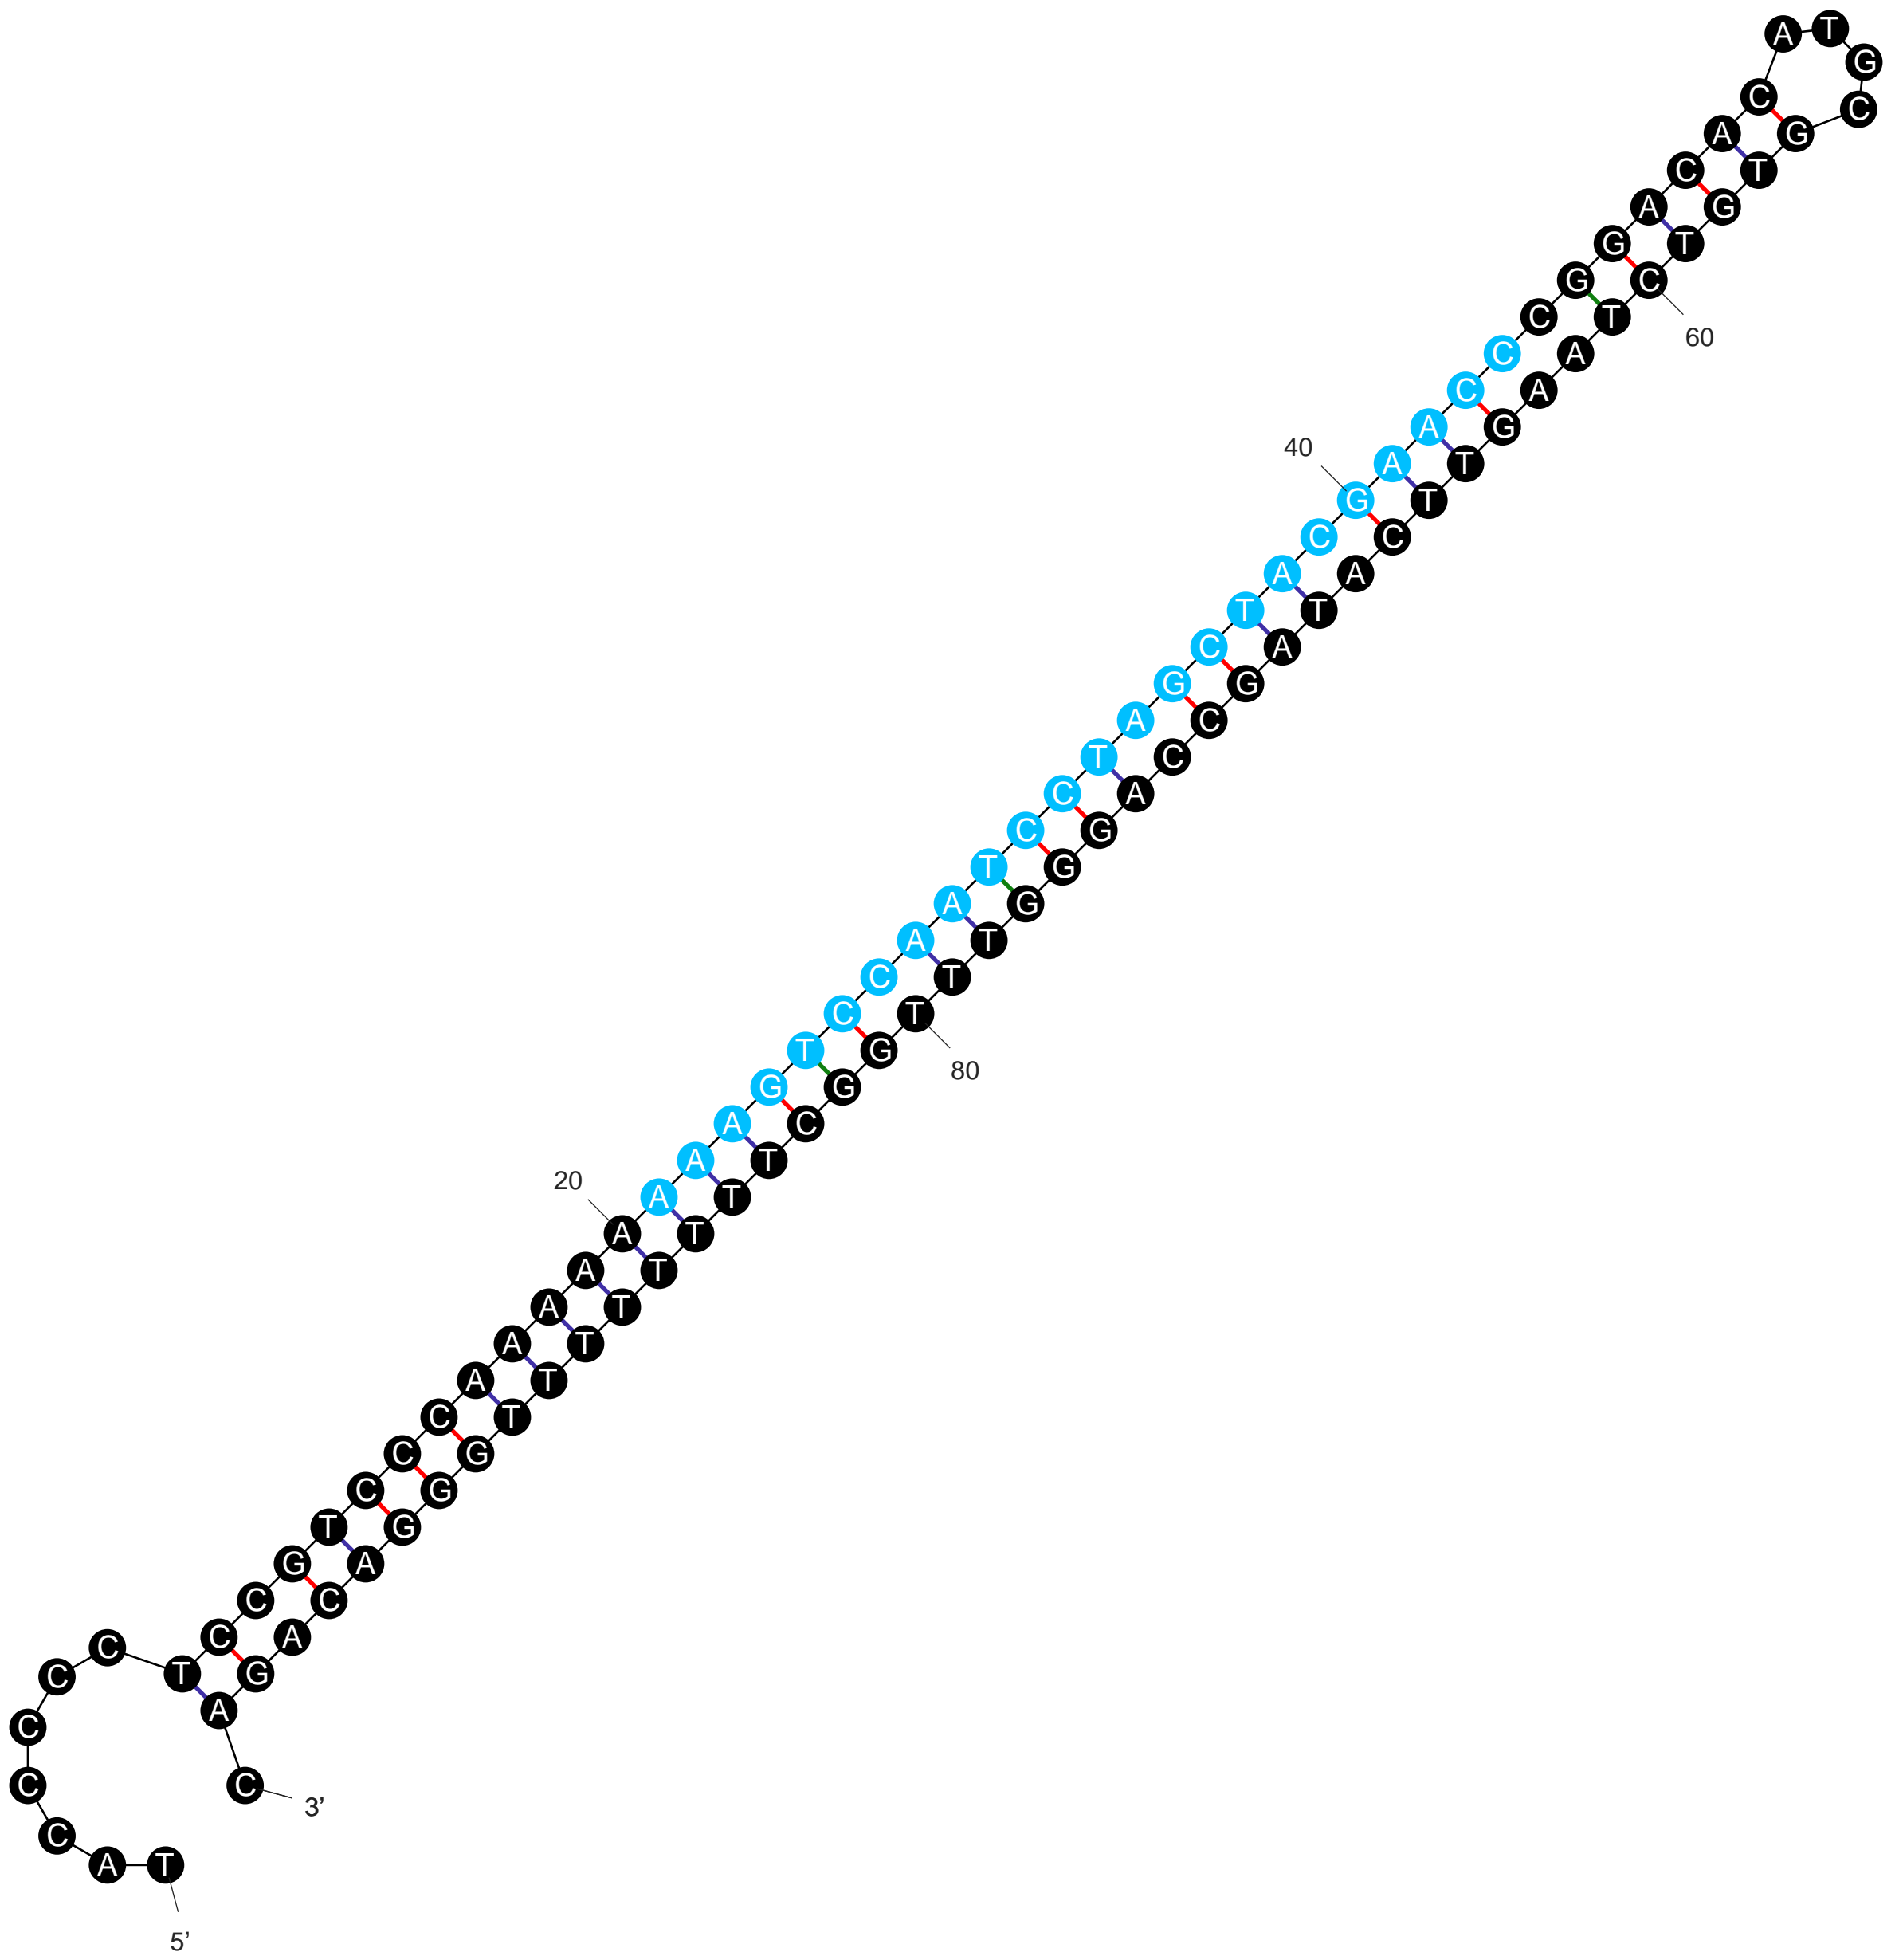

$dG = -51.10$  osa-cand047

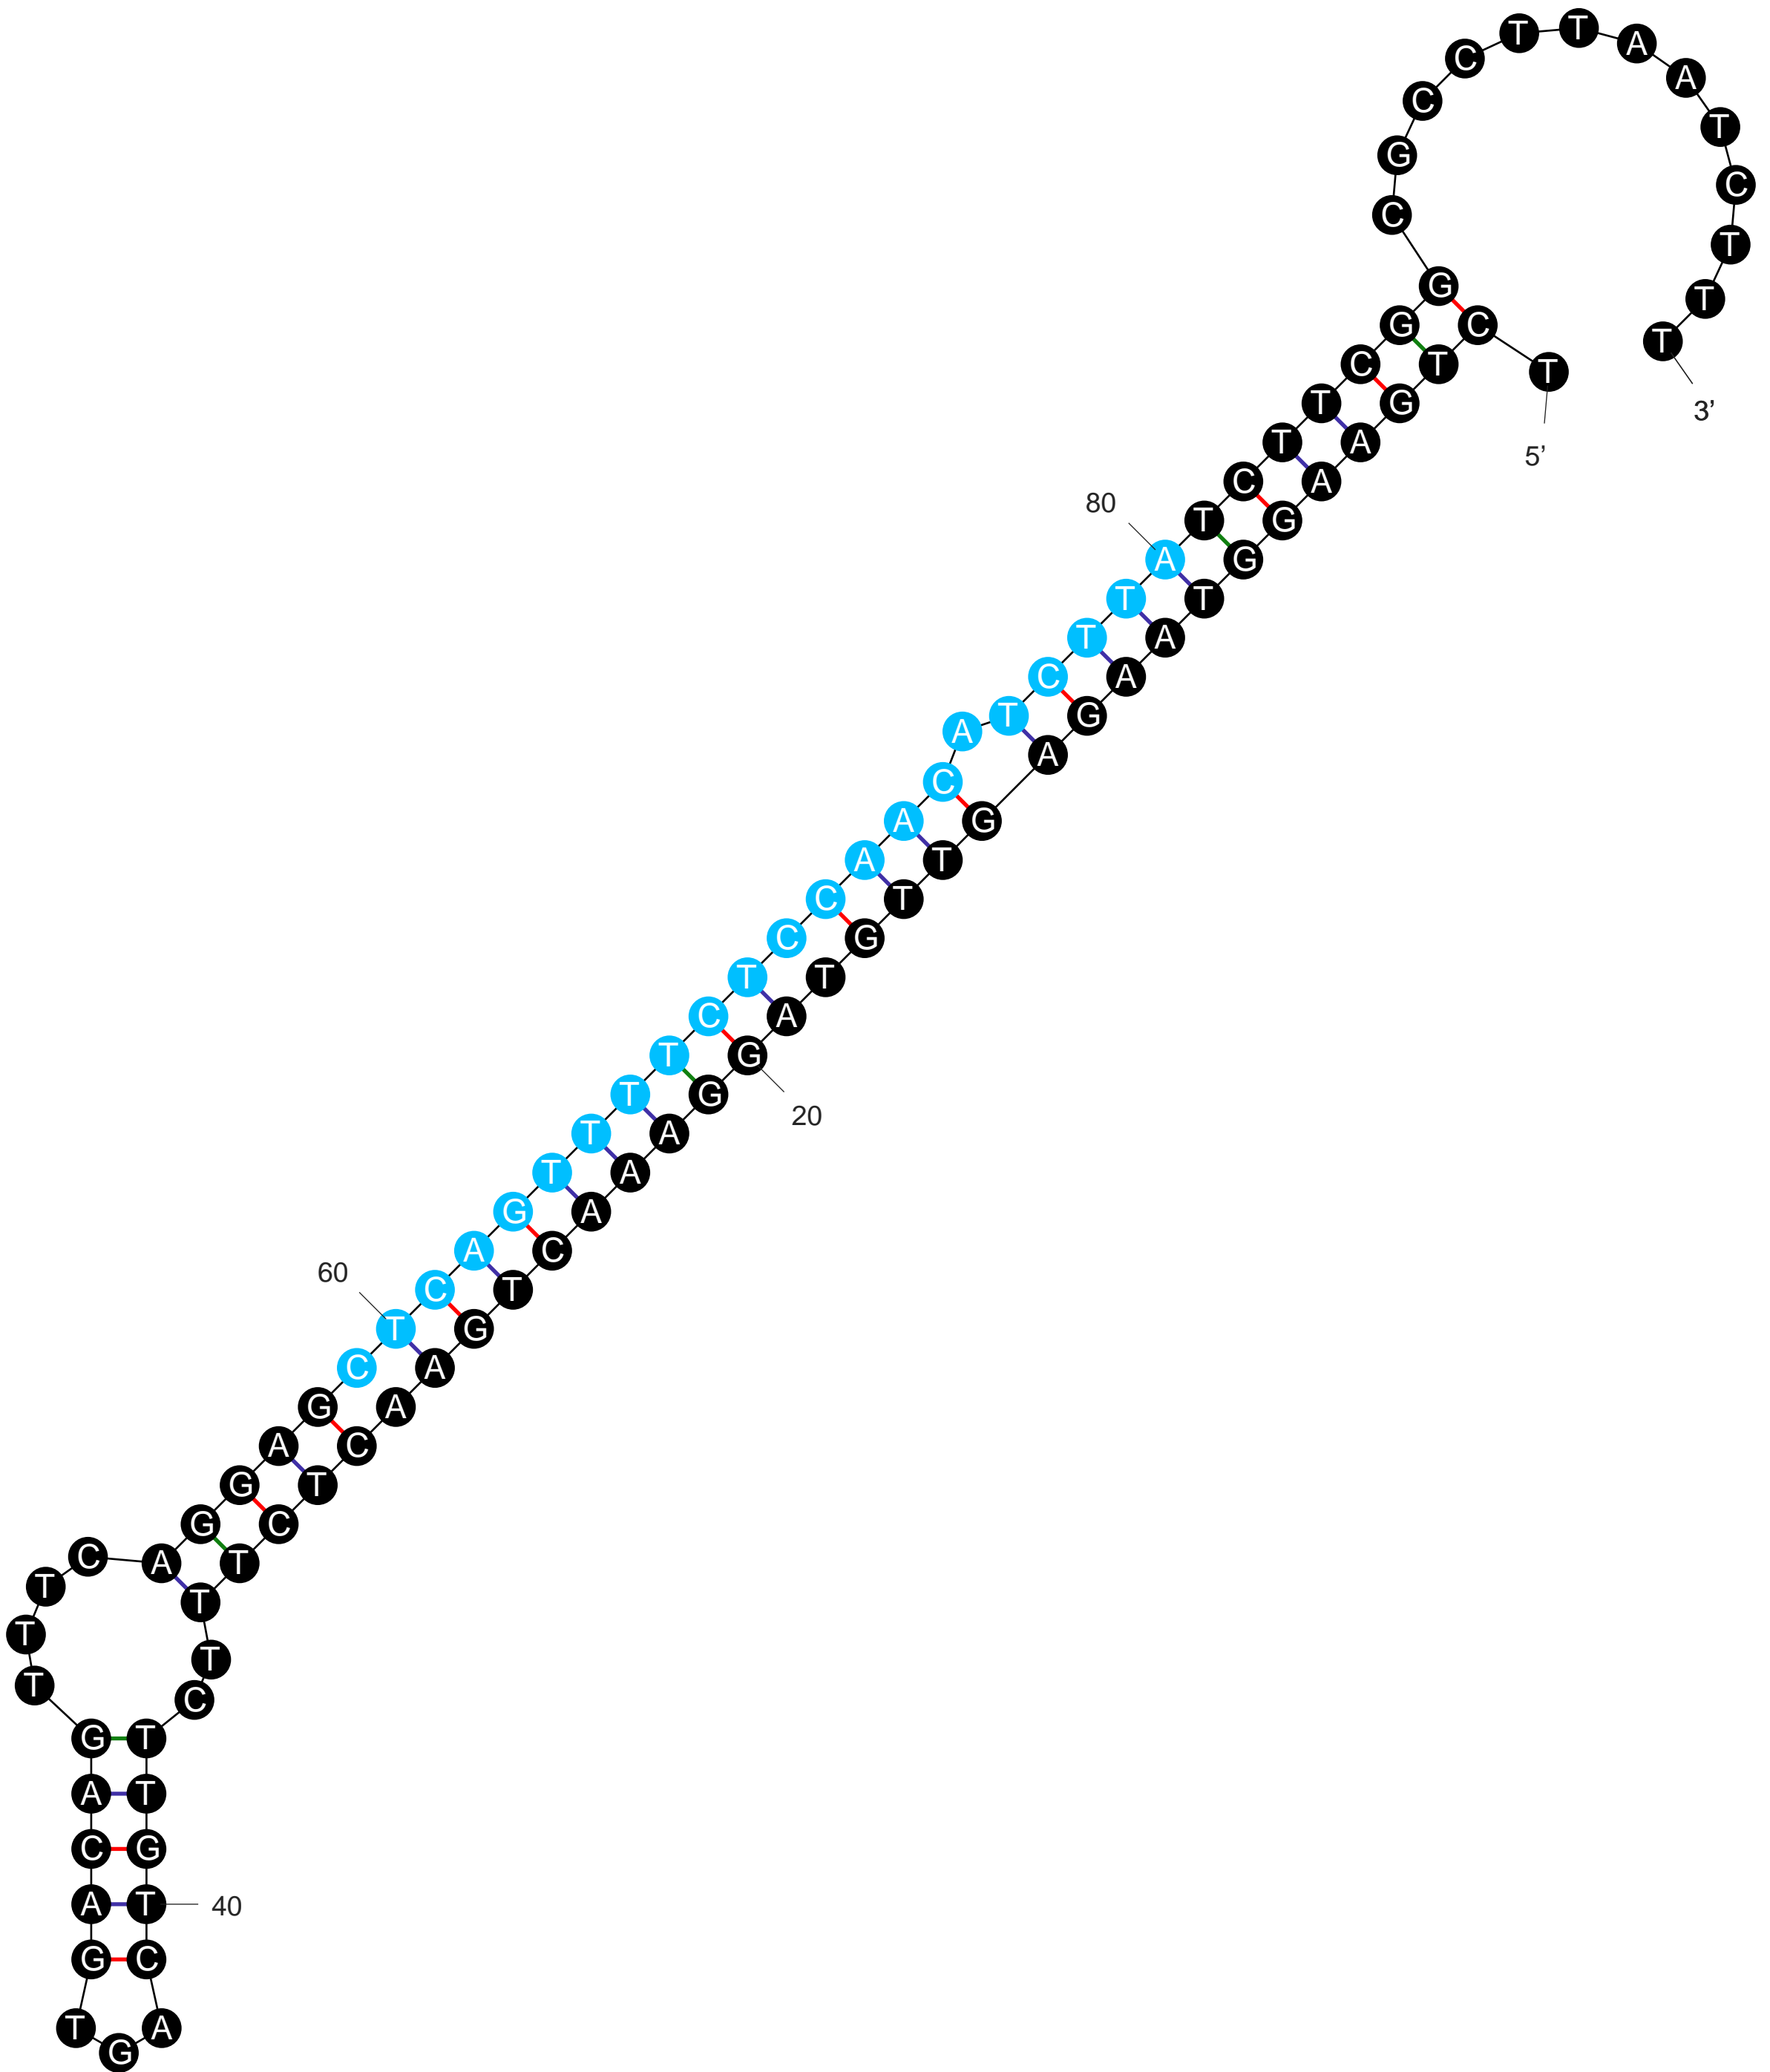

$dG = -40.20$  osa-cand048

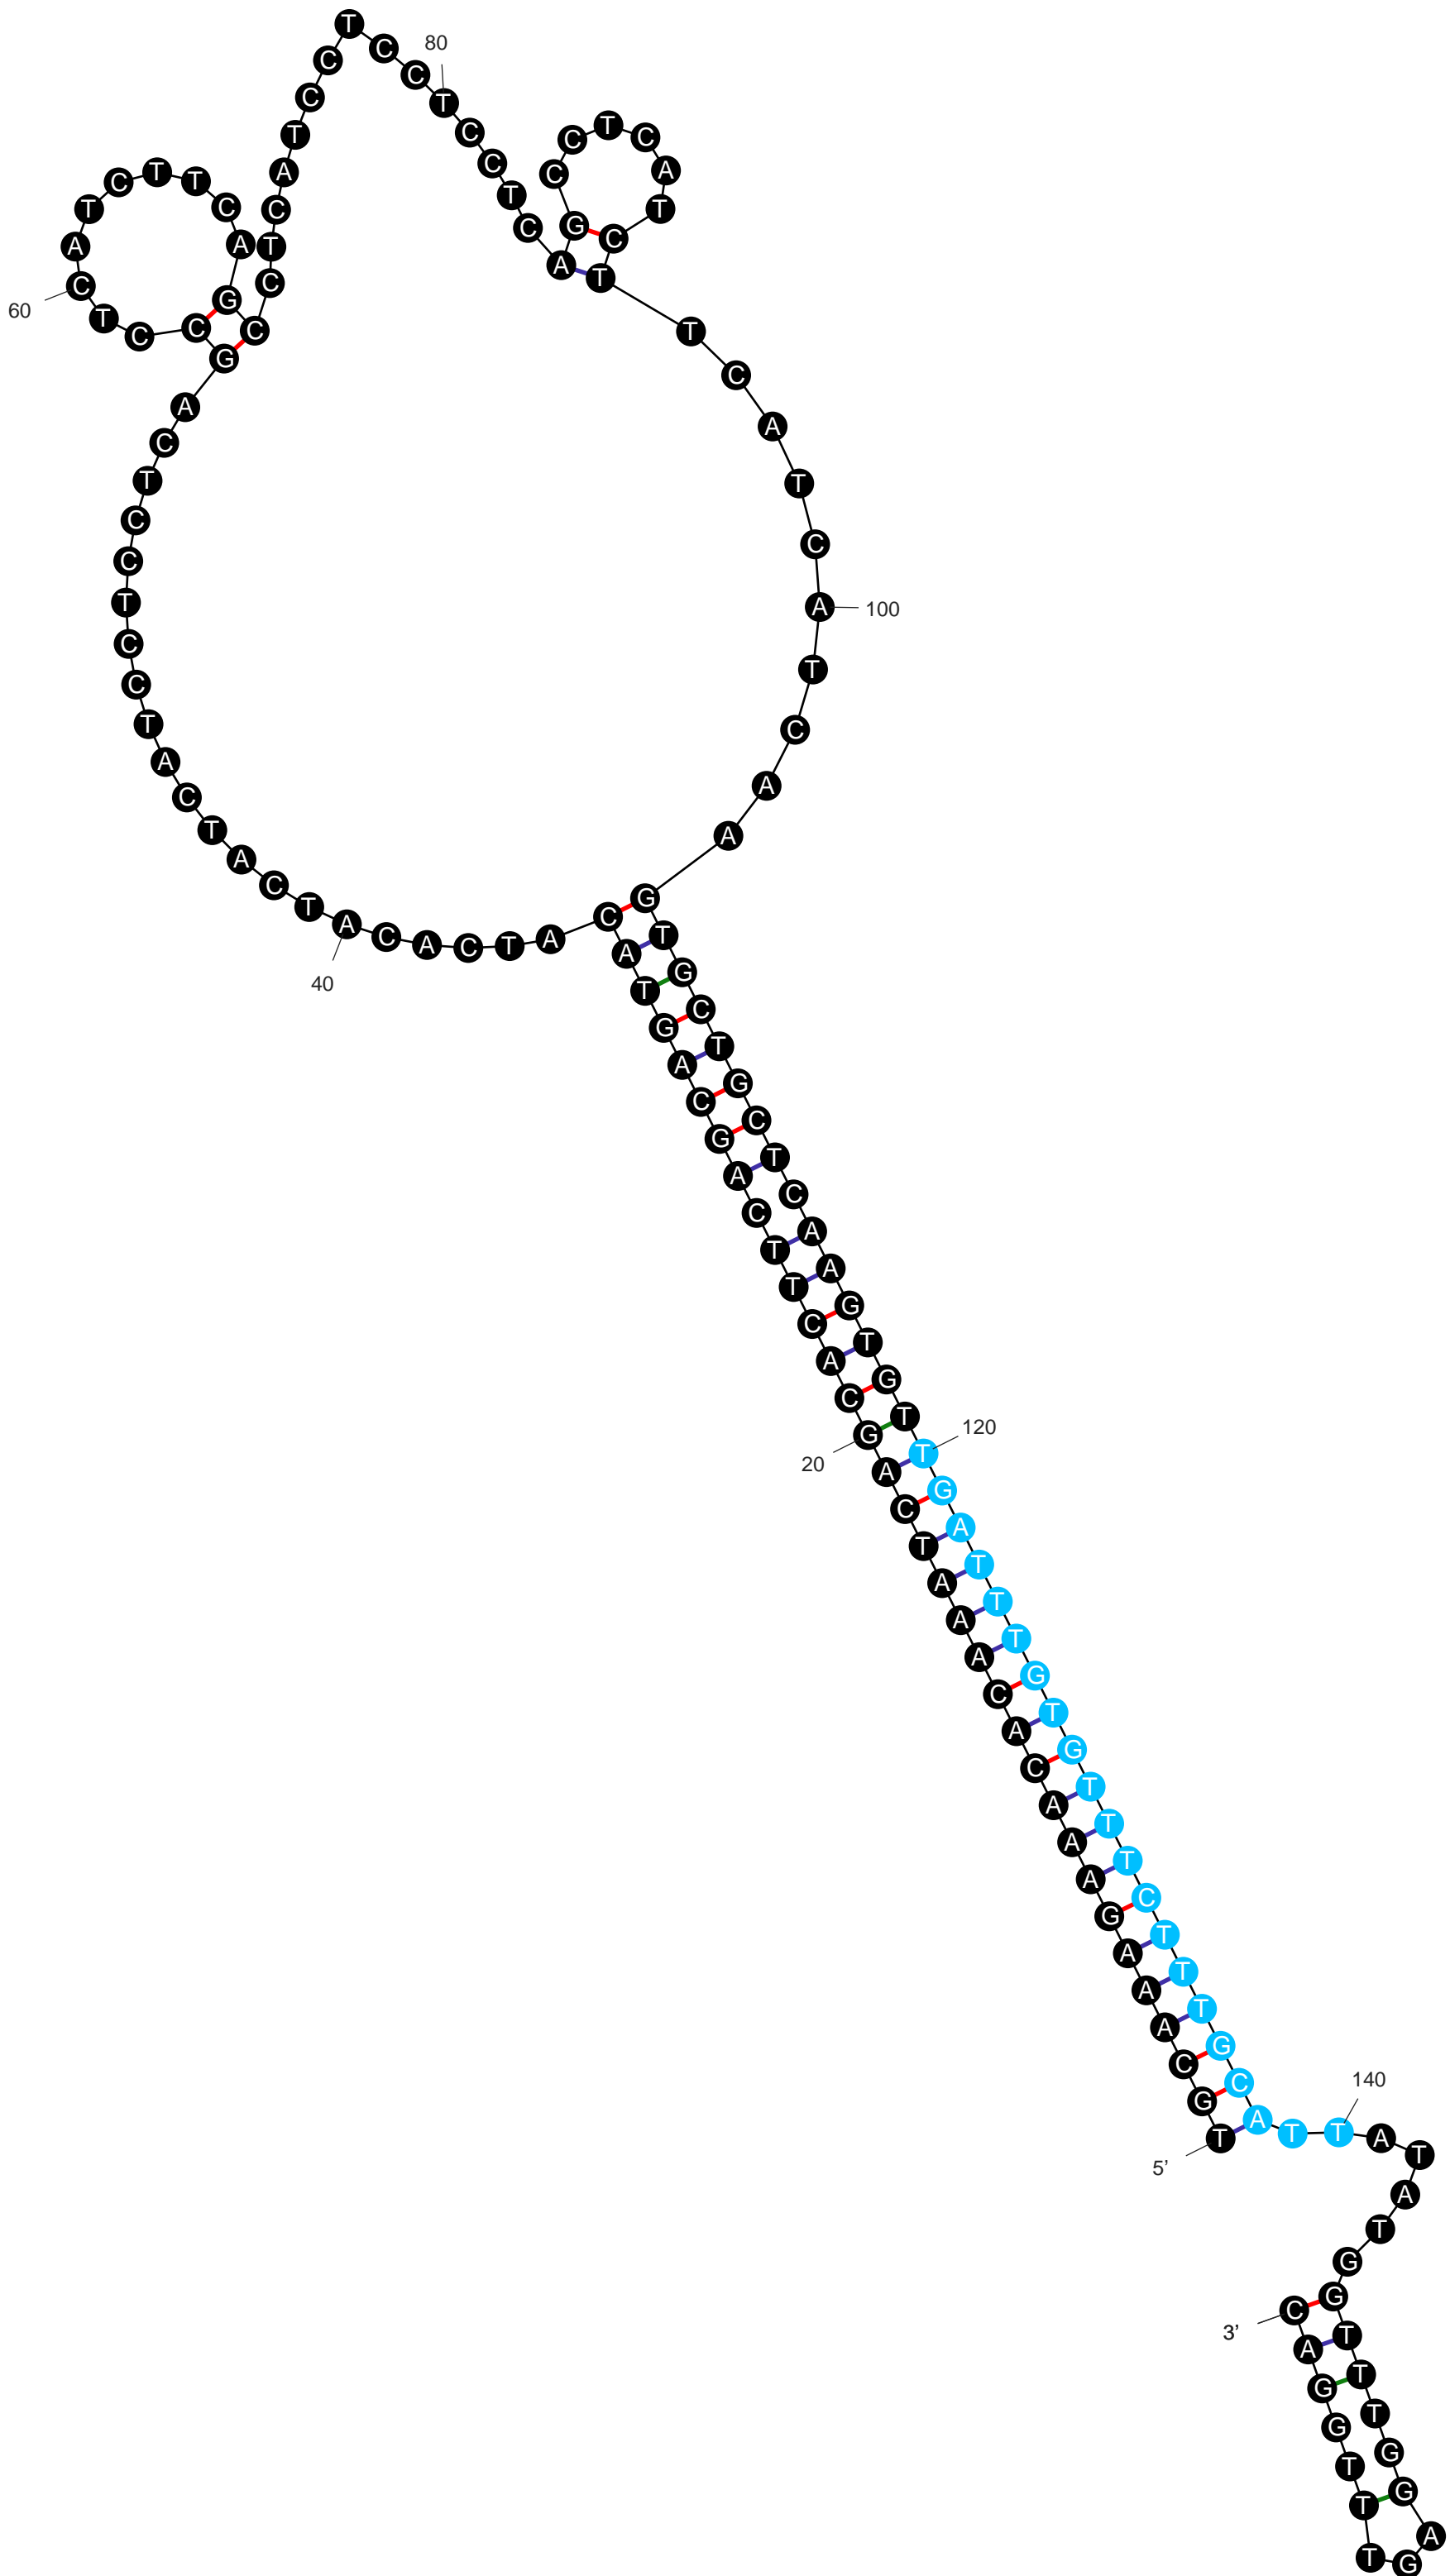

$dG = -49.40$  osa-cand049



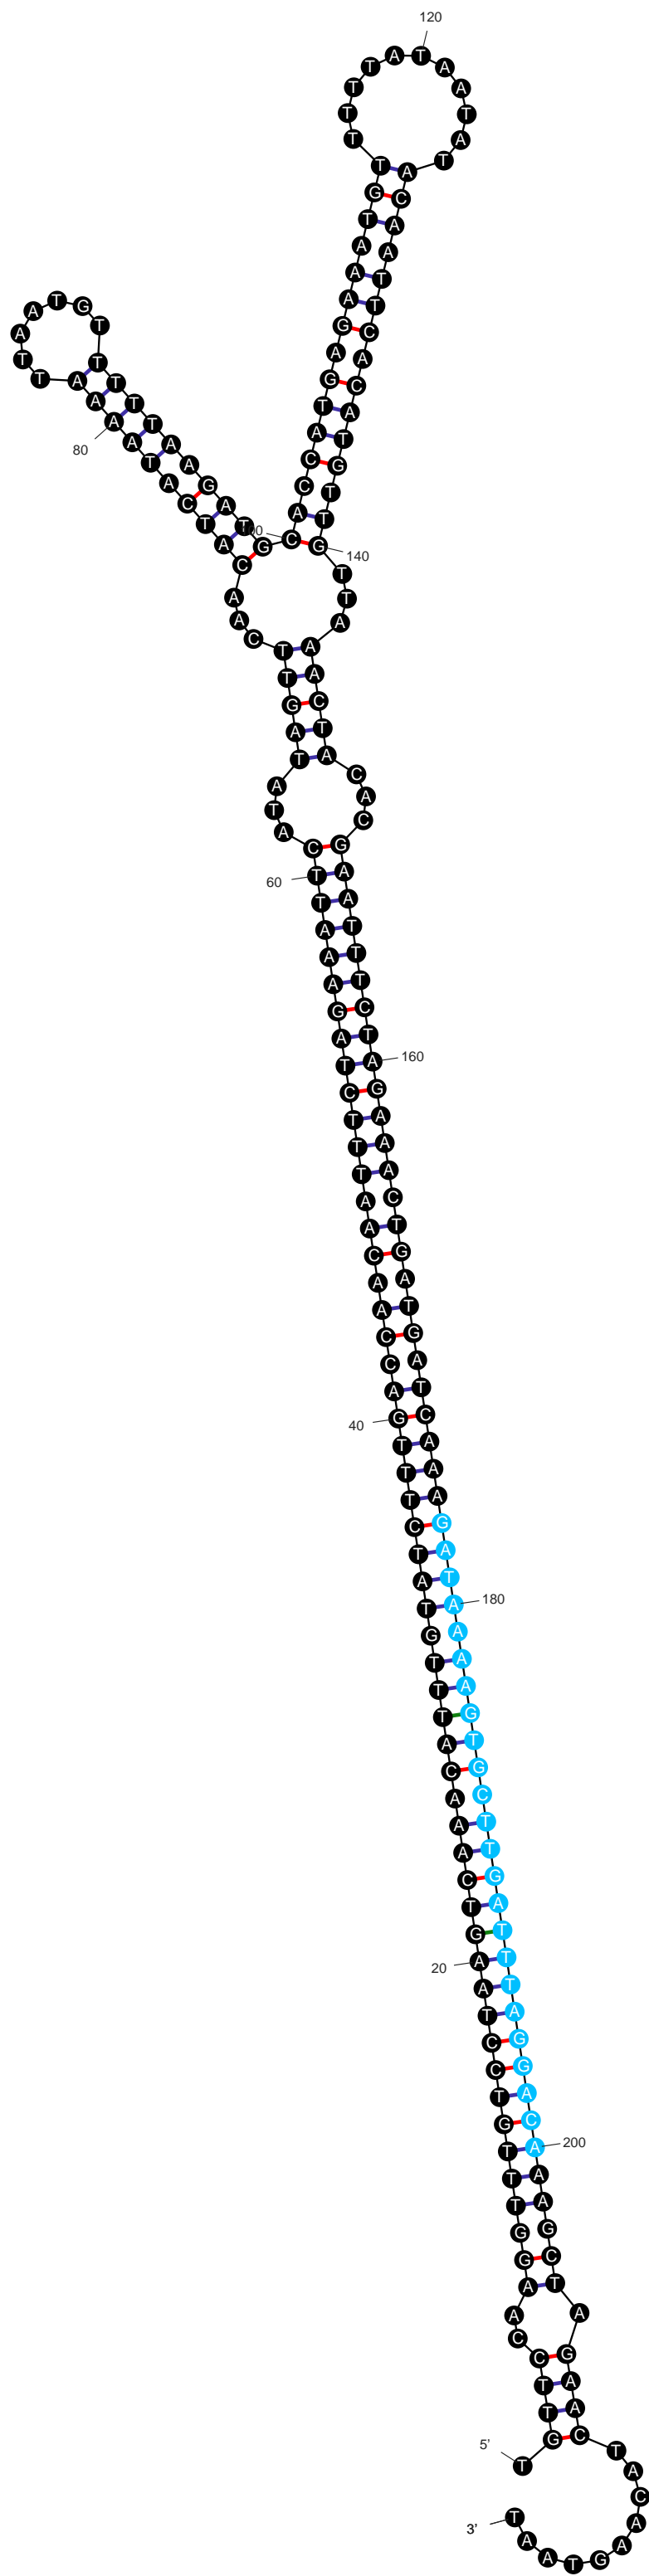

$dG = -74.60$  osa-cand050

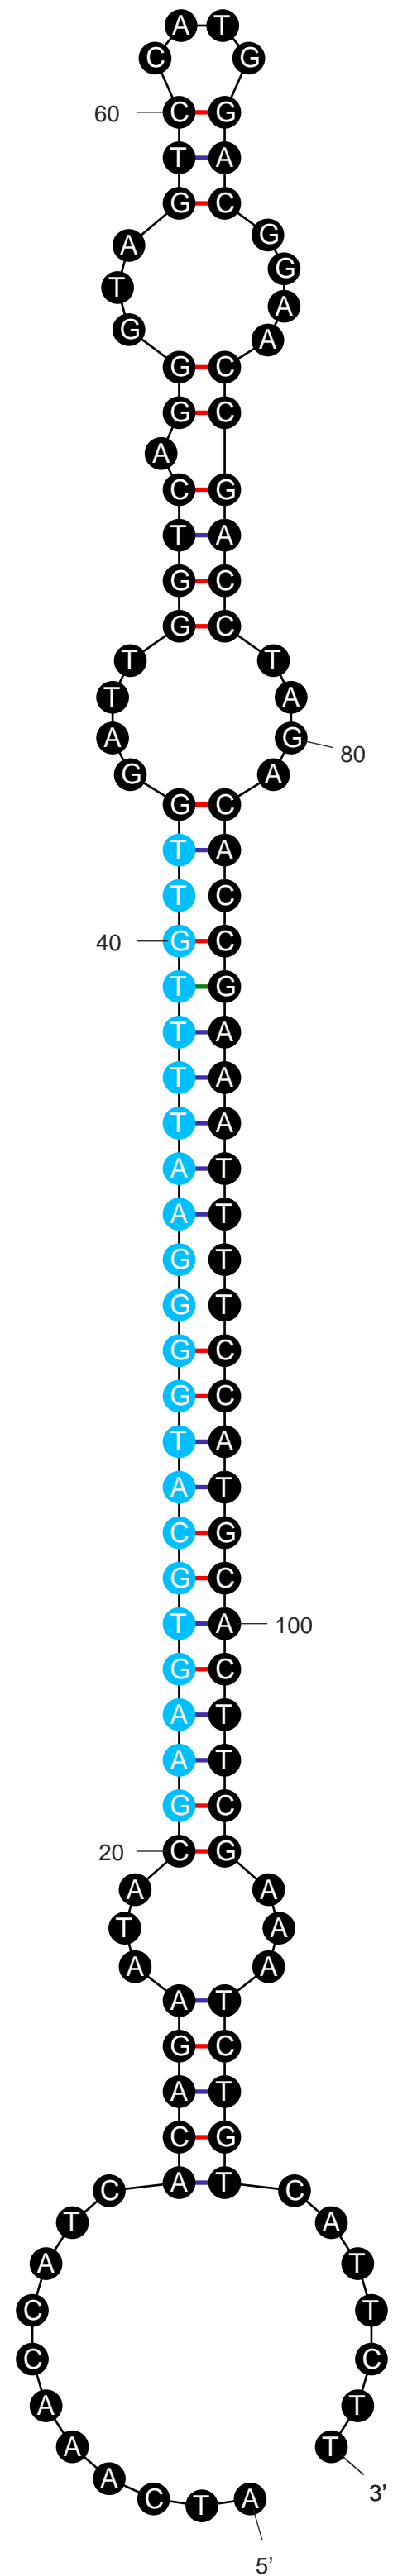

$dG = -52.00$  osa-cand051

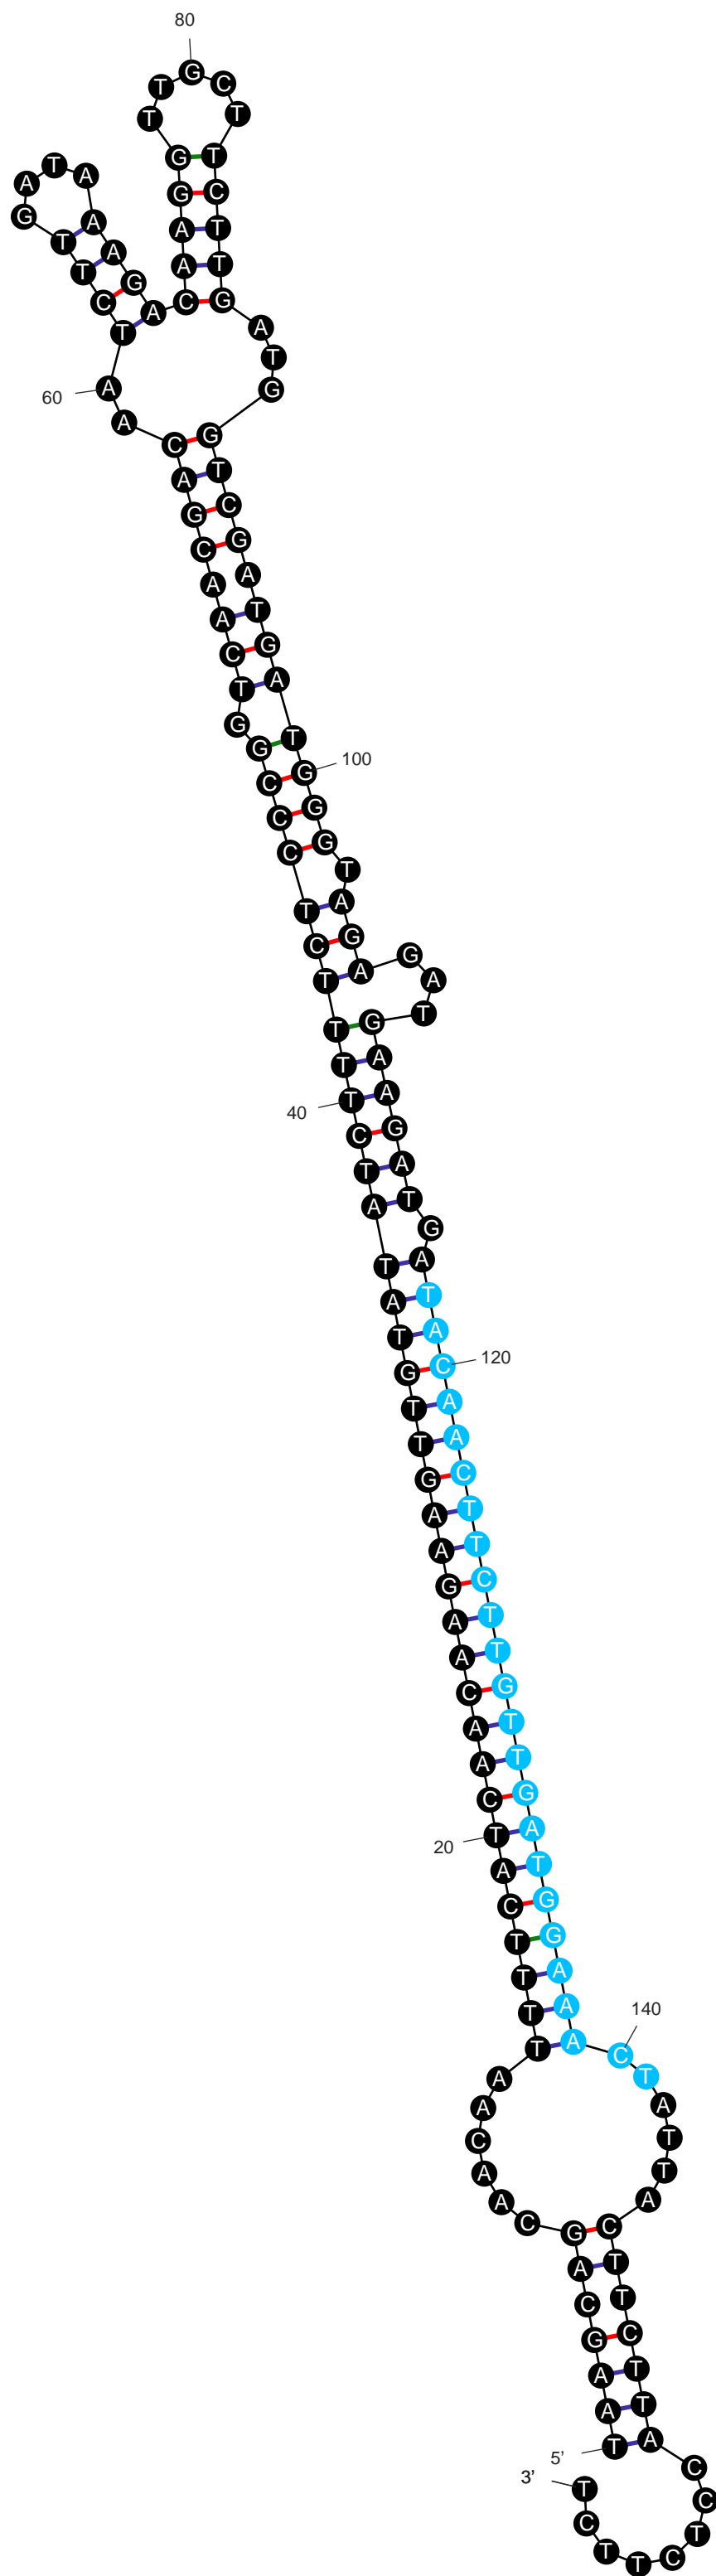

$dG = -59.10$  osa-cand052a

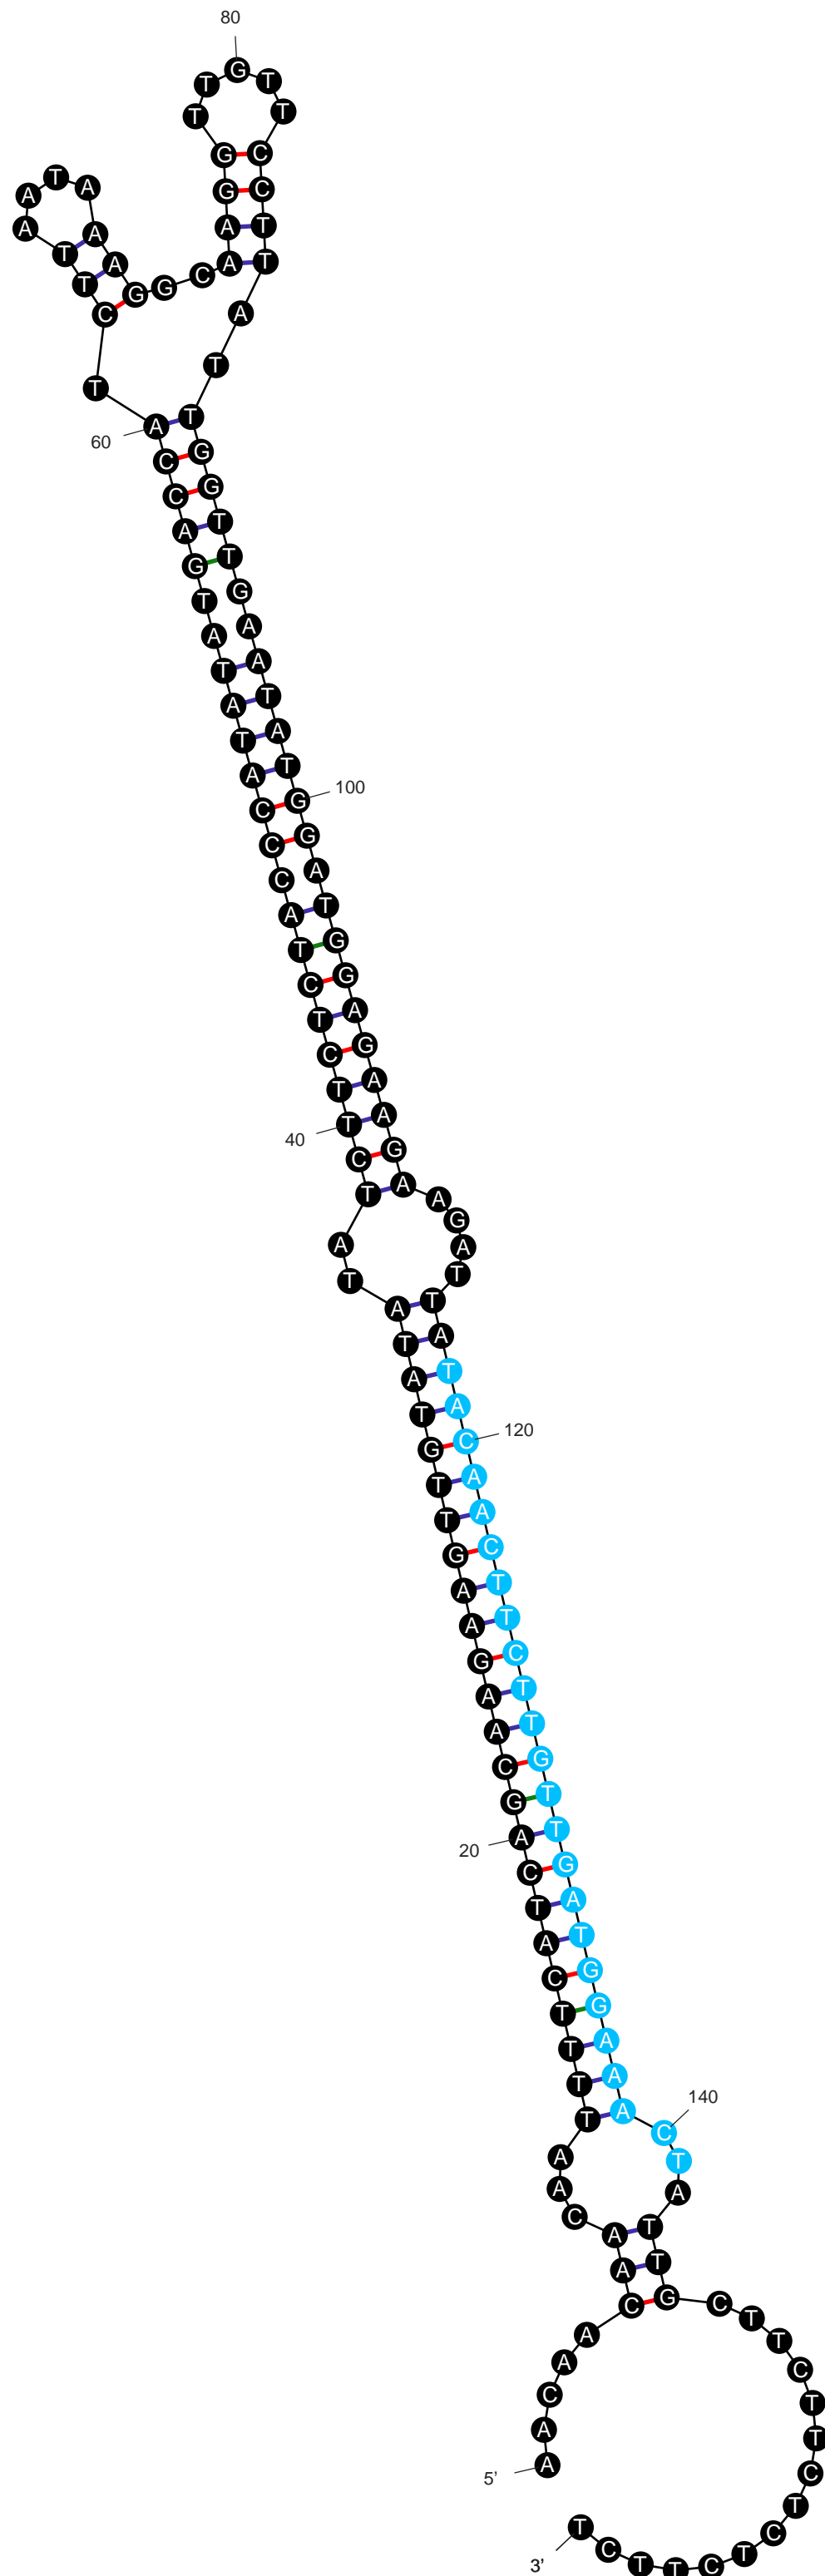

$dG = -61.30$  osa-cand052b

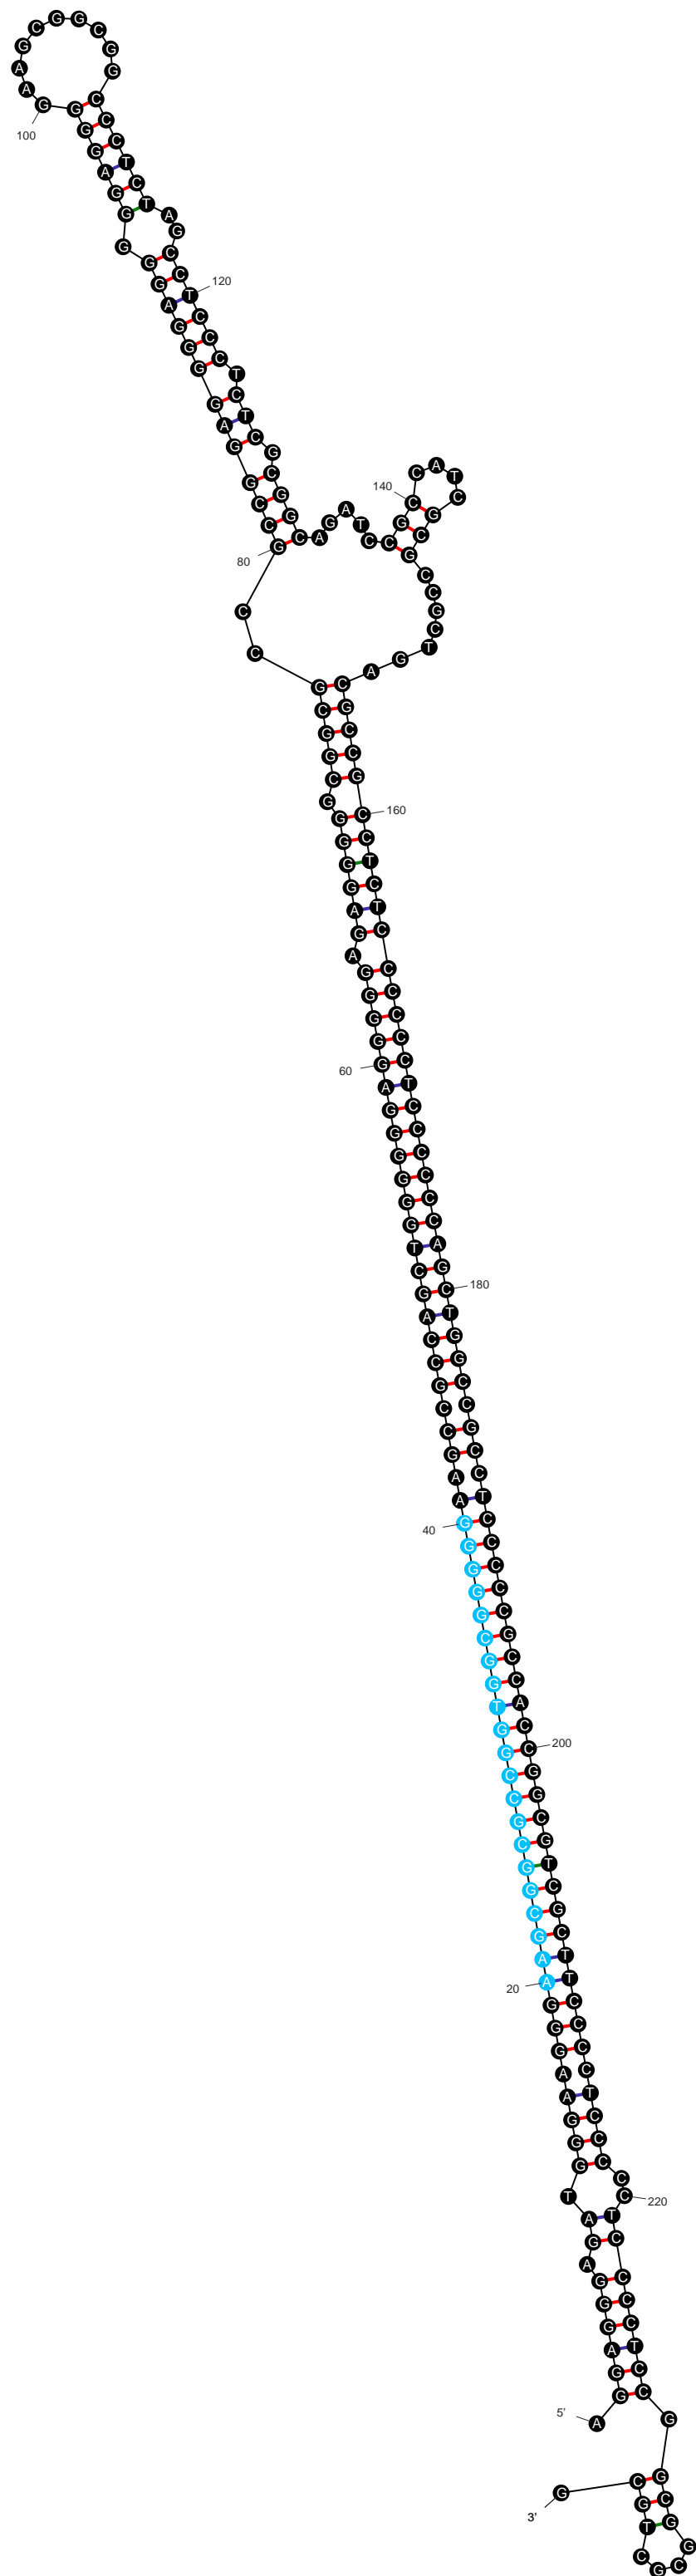

$dG = -200.60$  osa-cand053

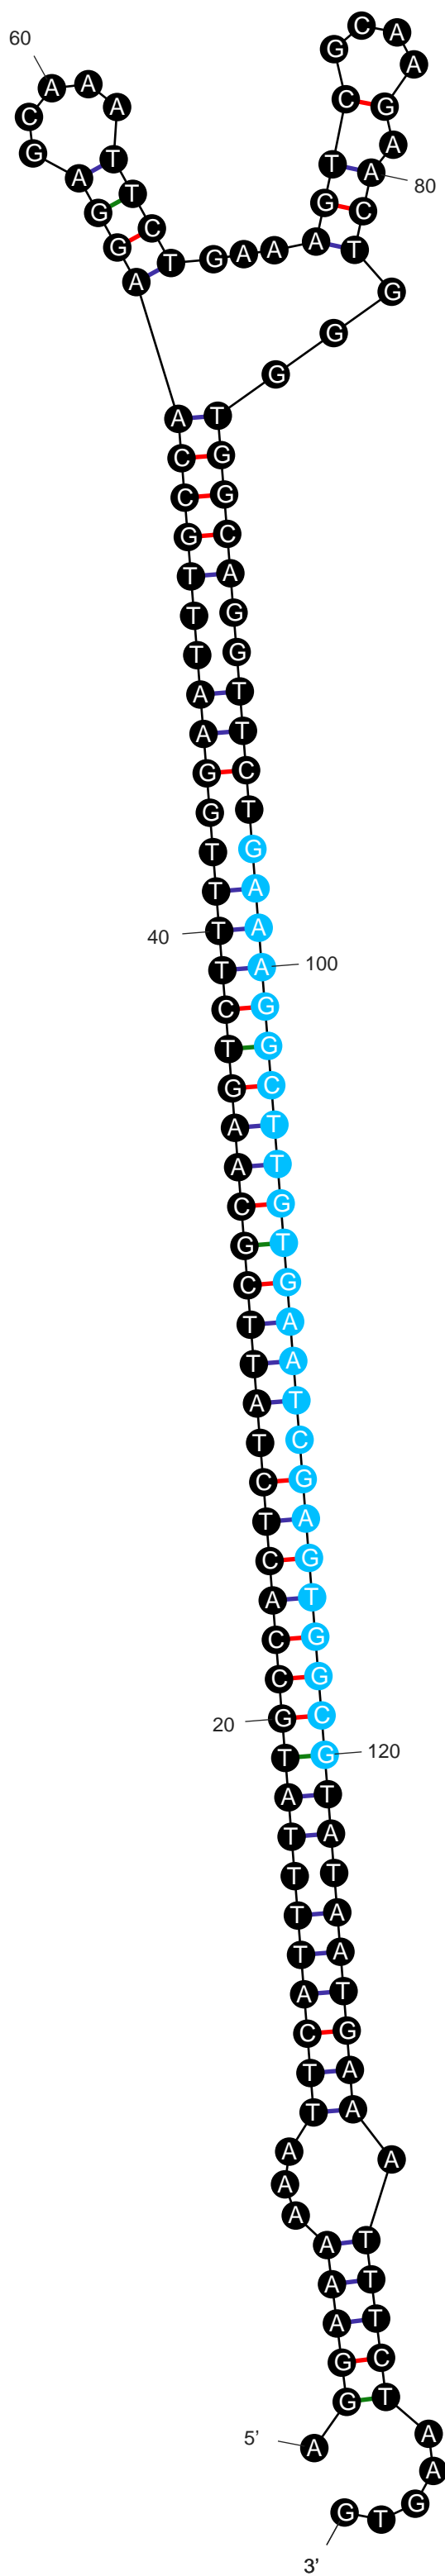

$dG = -66.00$  osa-cand054

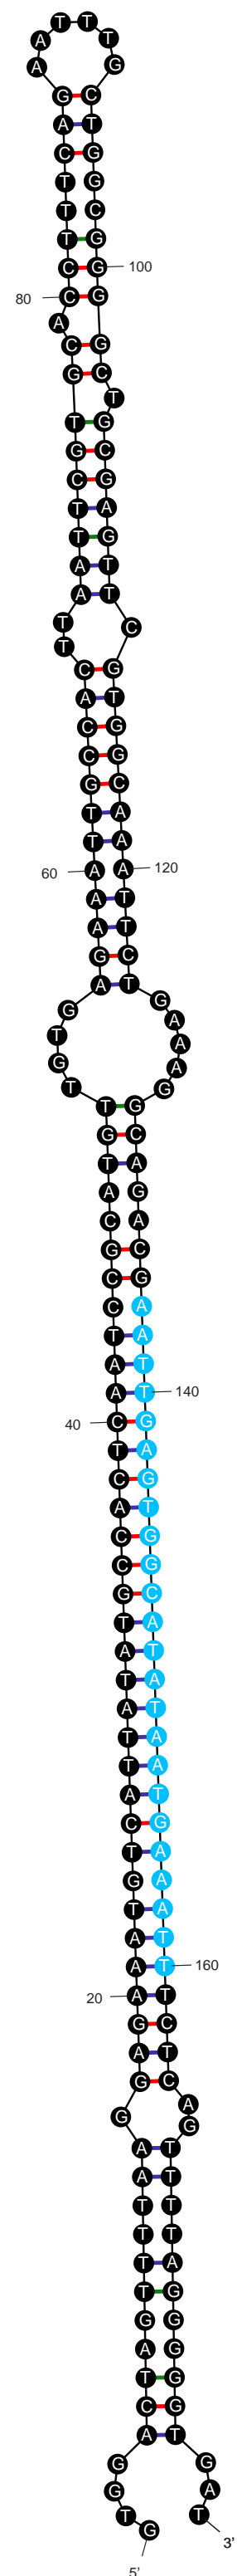

$dG = -75.40$  osa-cand055

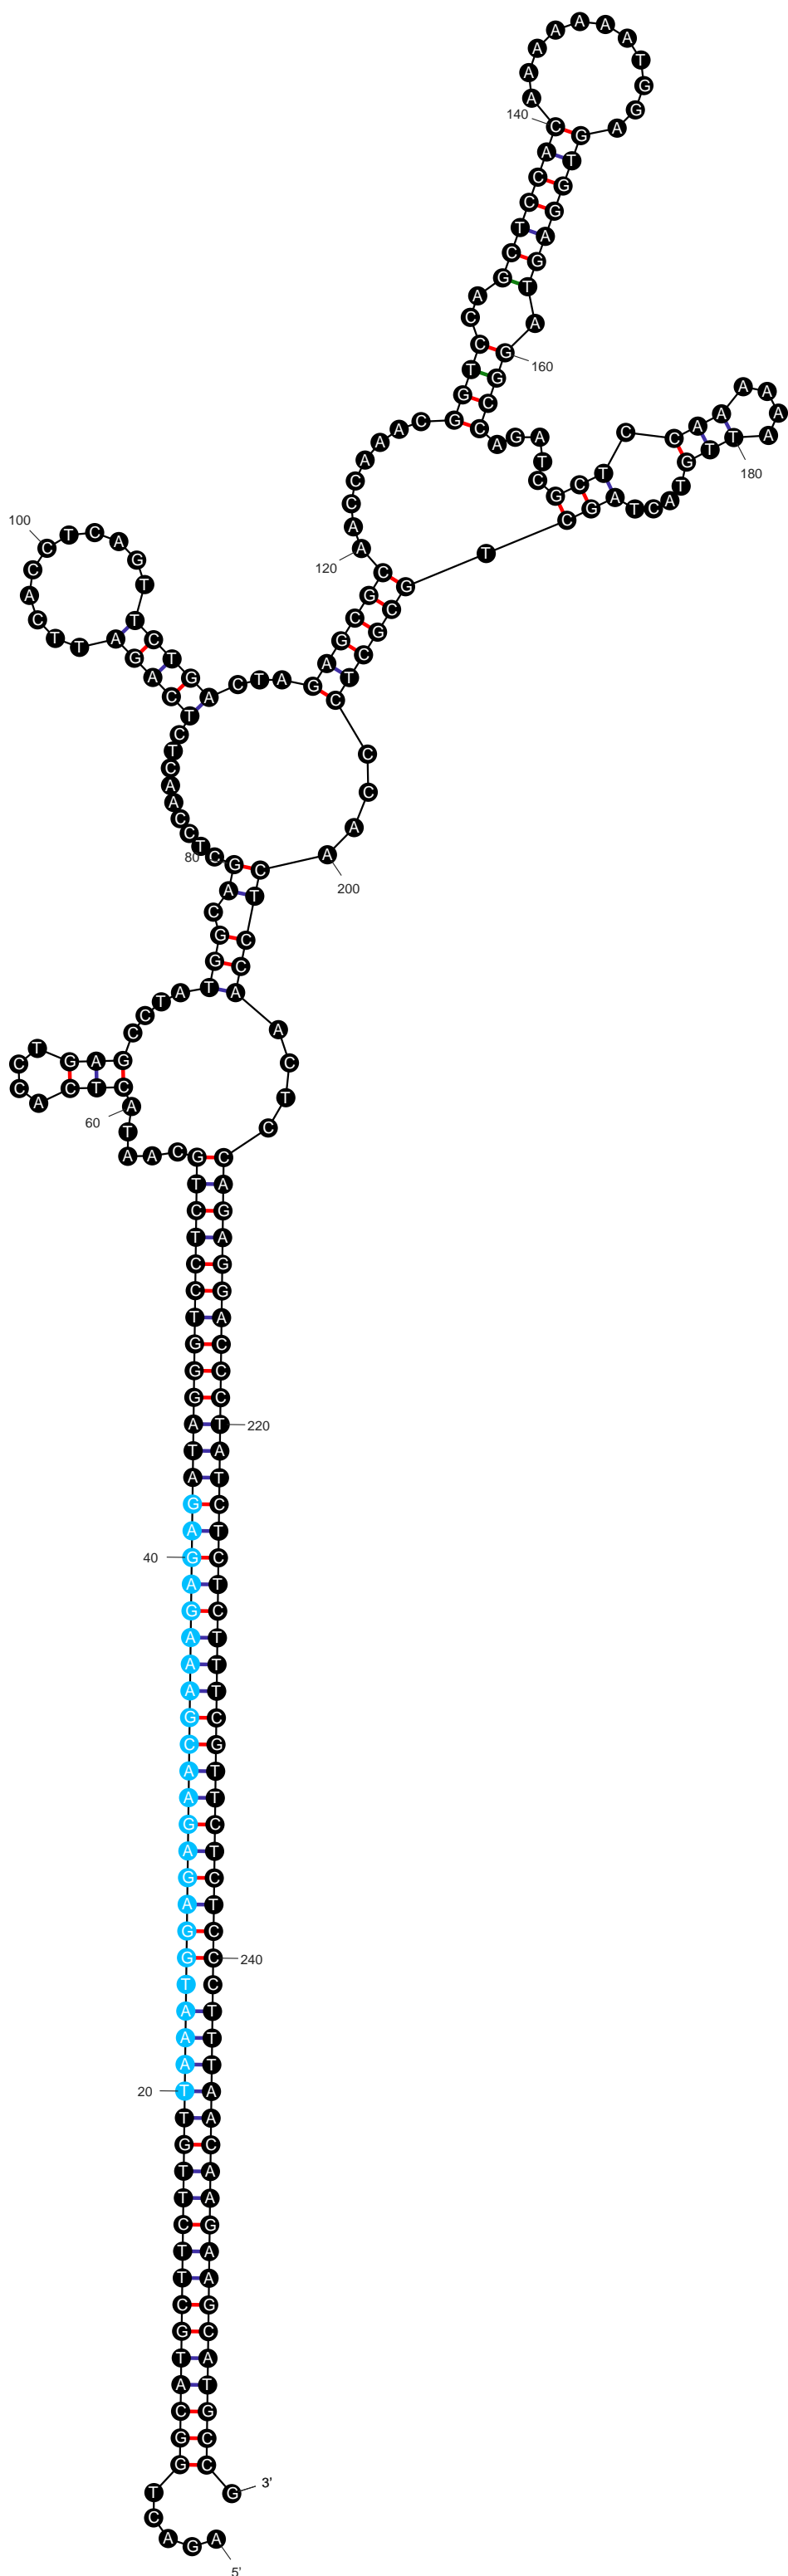

$dG = -130.80$  osa-cand056



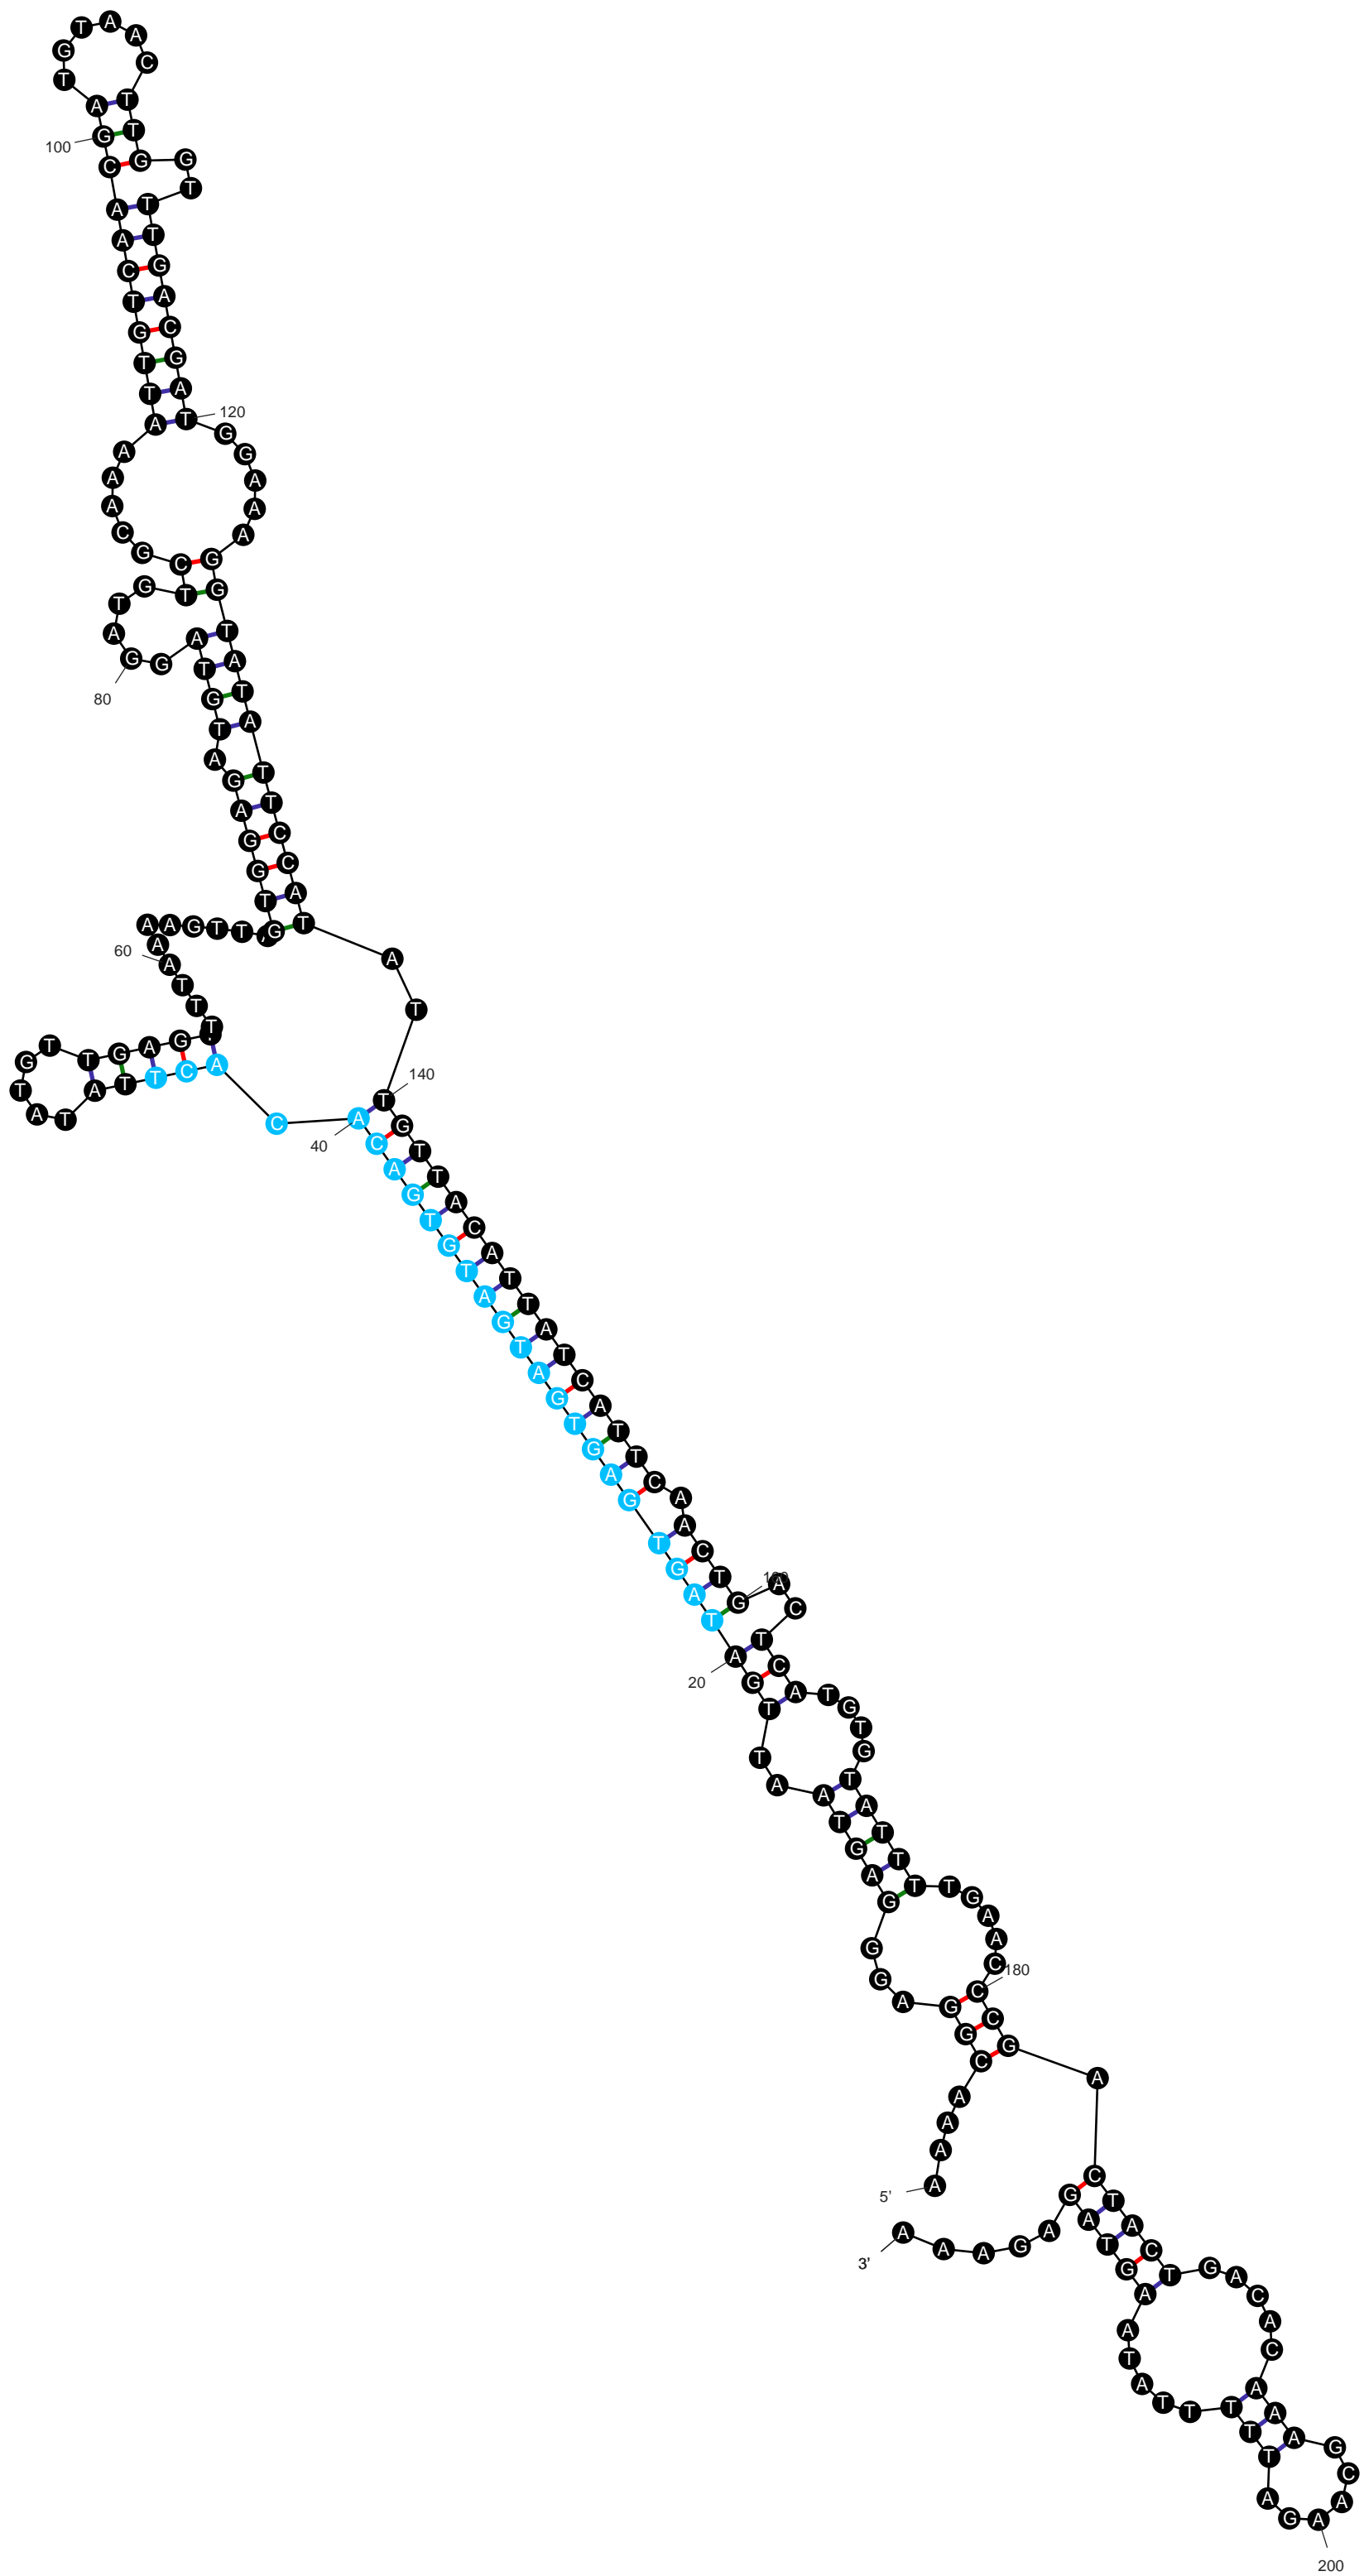

$dG = -47.00$  osa-cand057

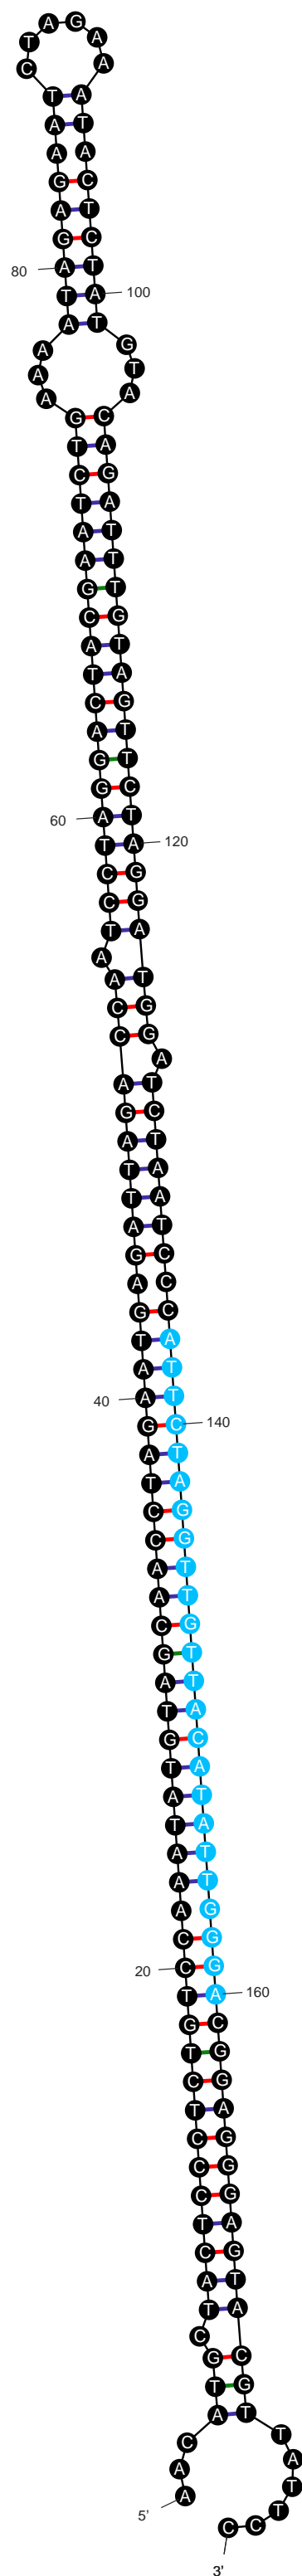

$dG = -110.60$  osa-cand058

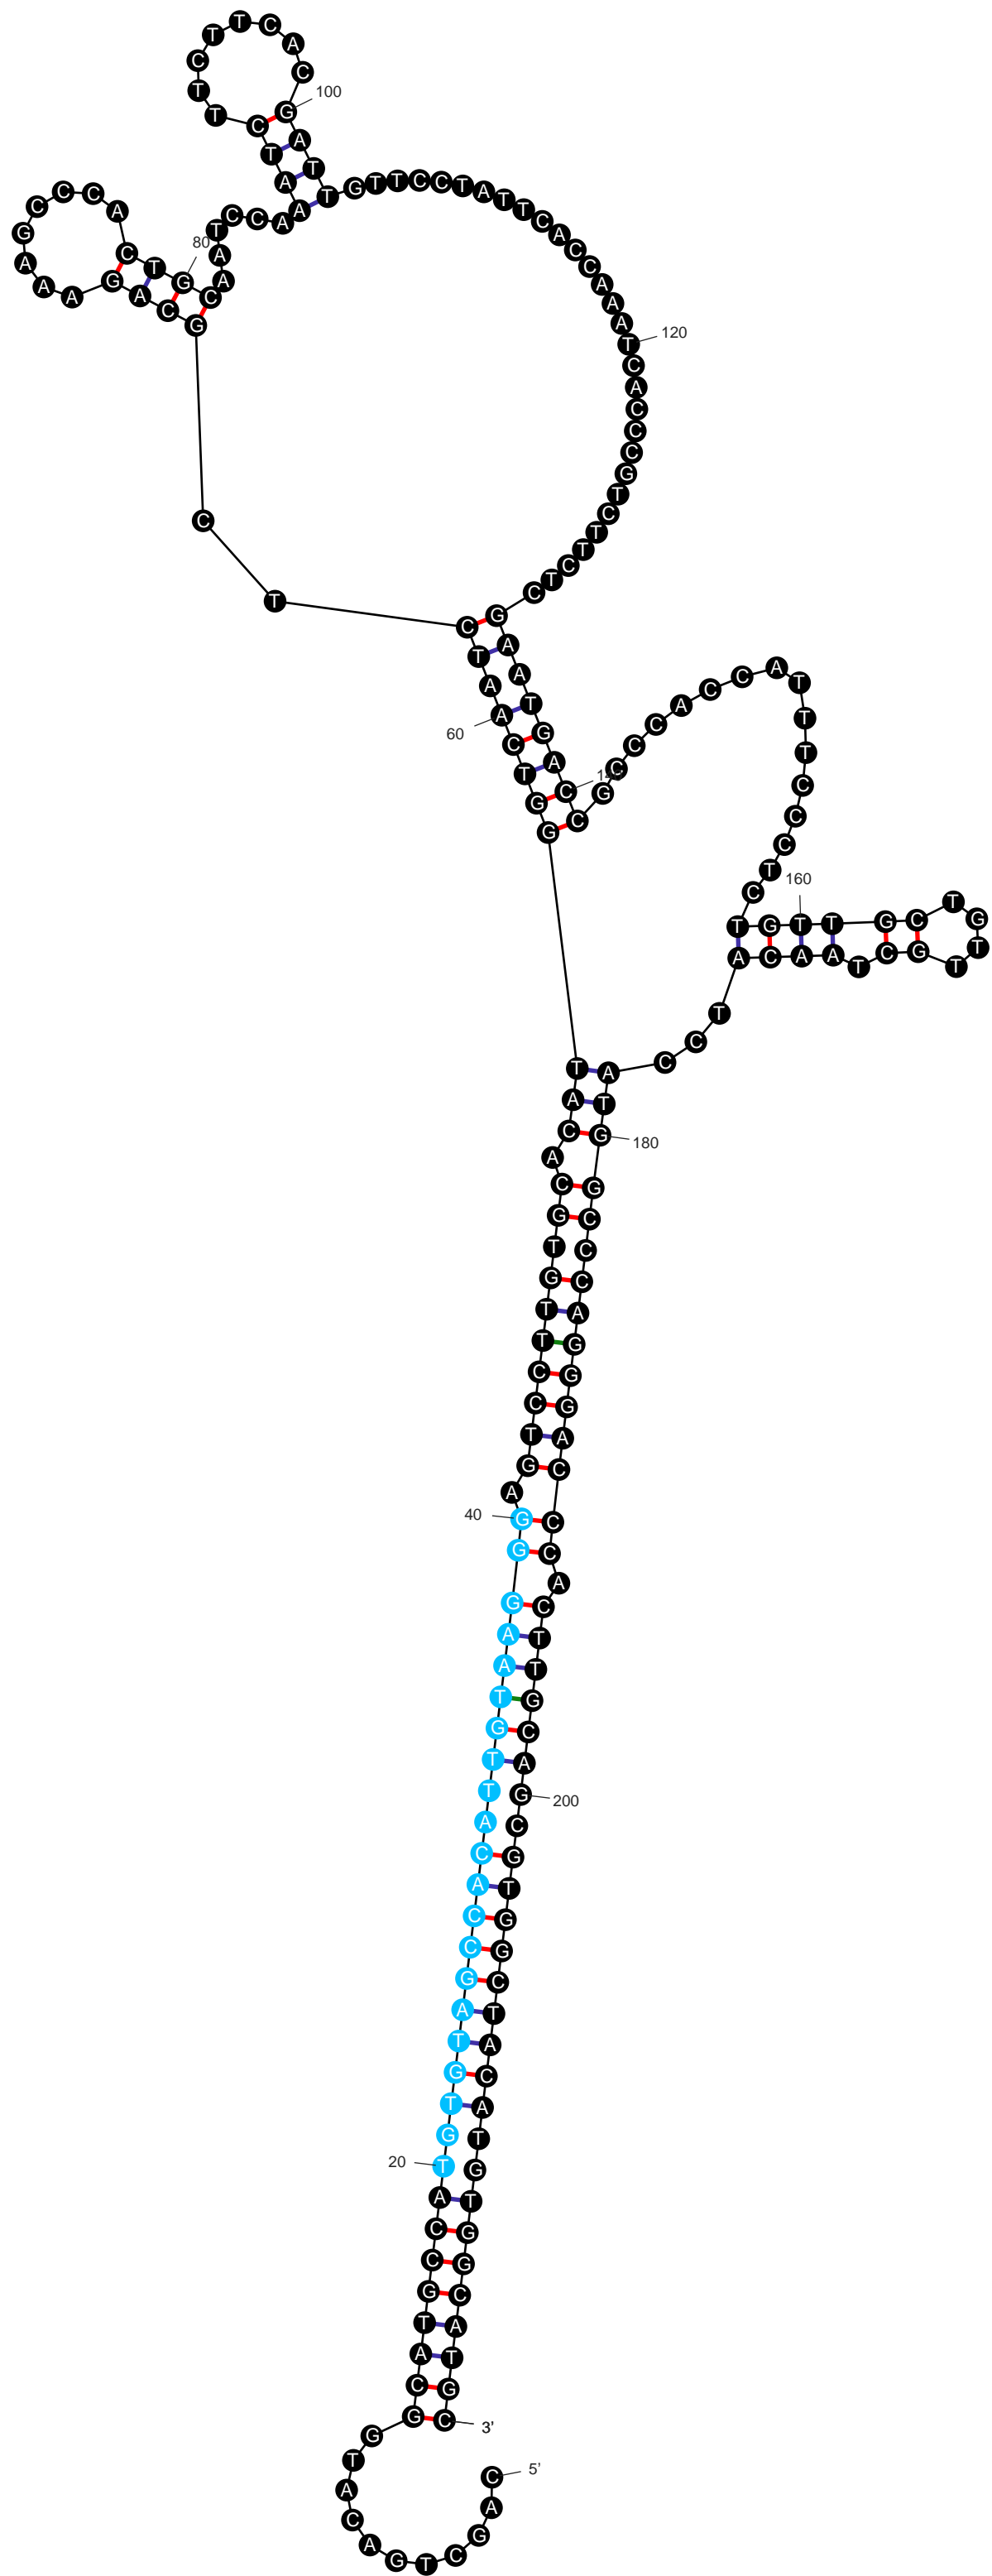

$dG = -80.20$  osa-cand059

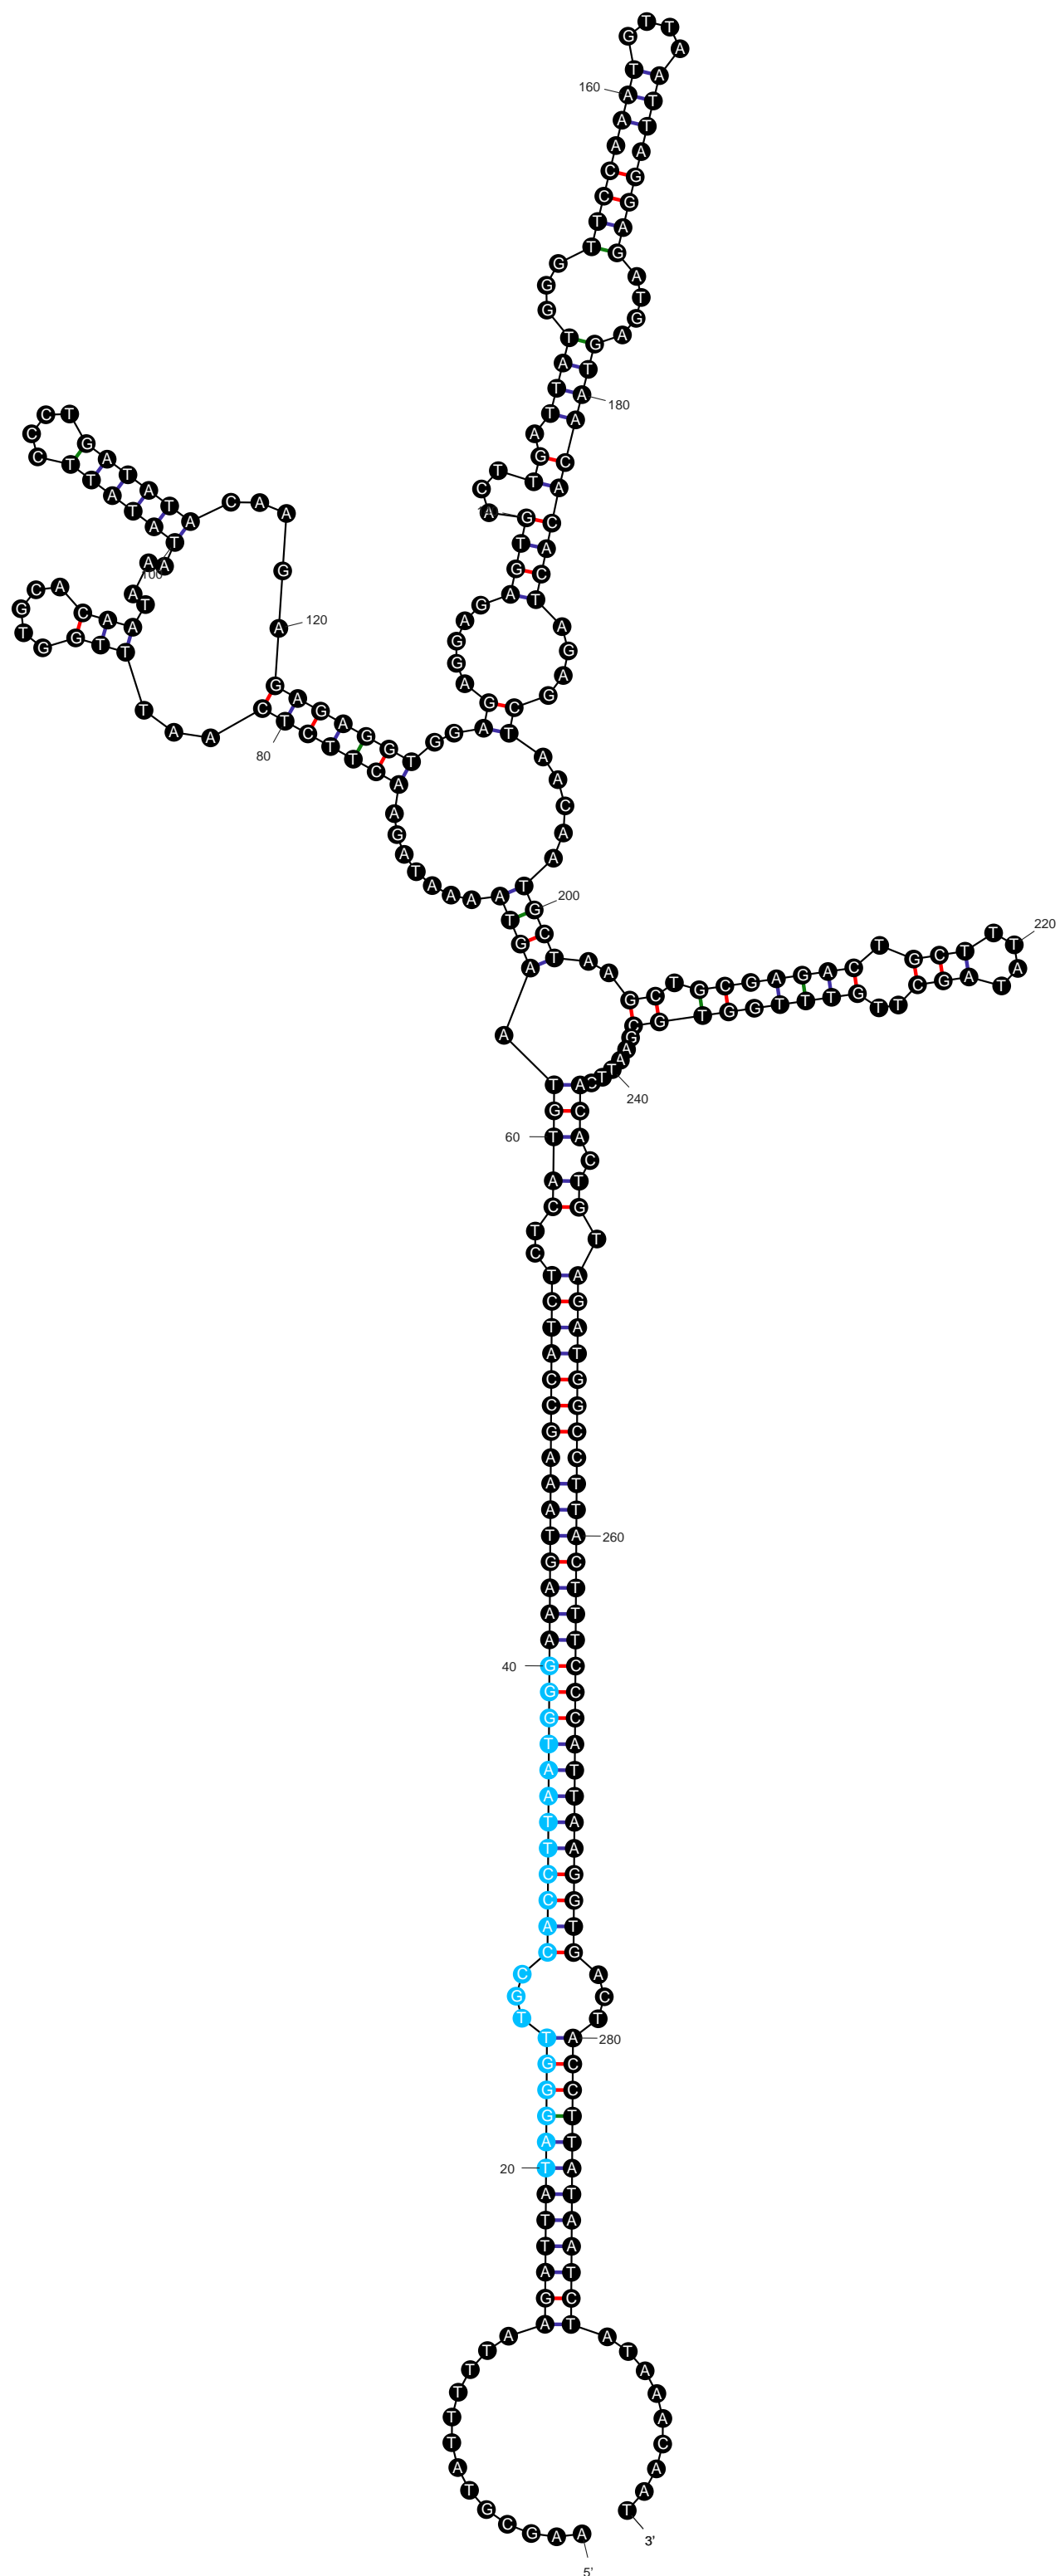

$dG = -91.50$  osa-cand060

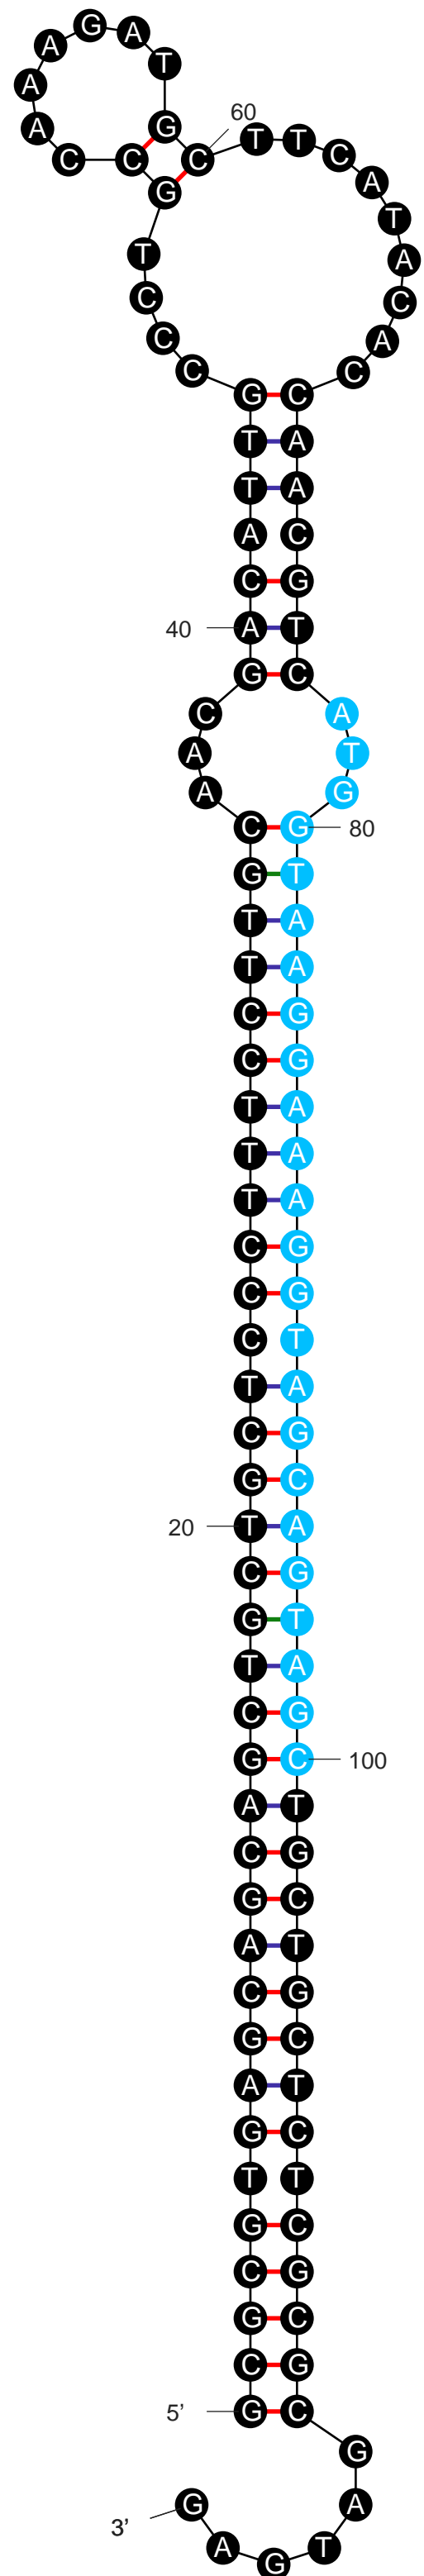

$dG = -69.60$  osa-cand061

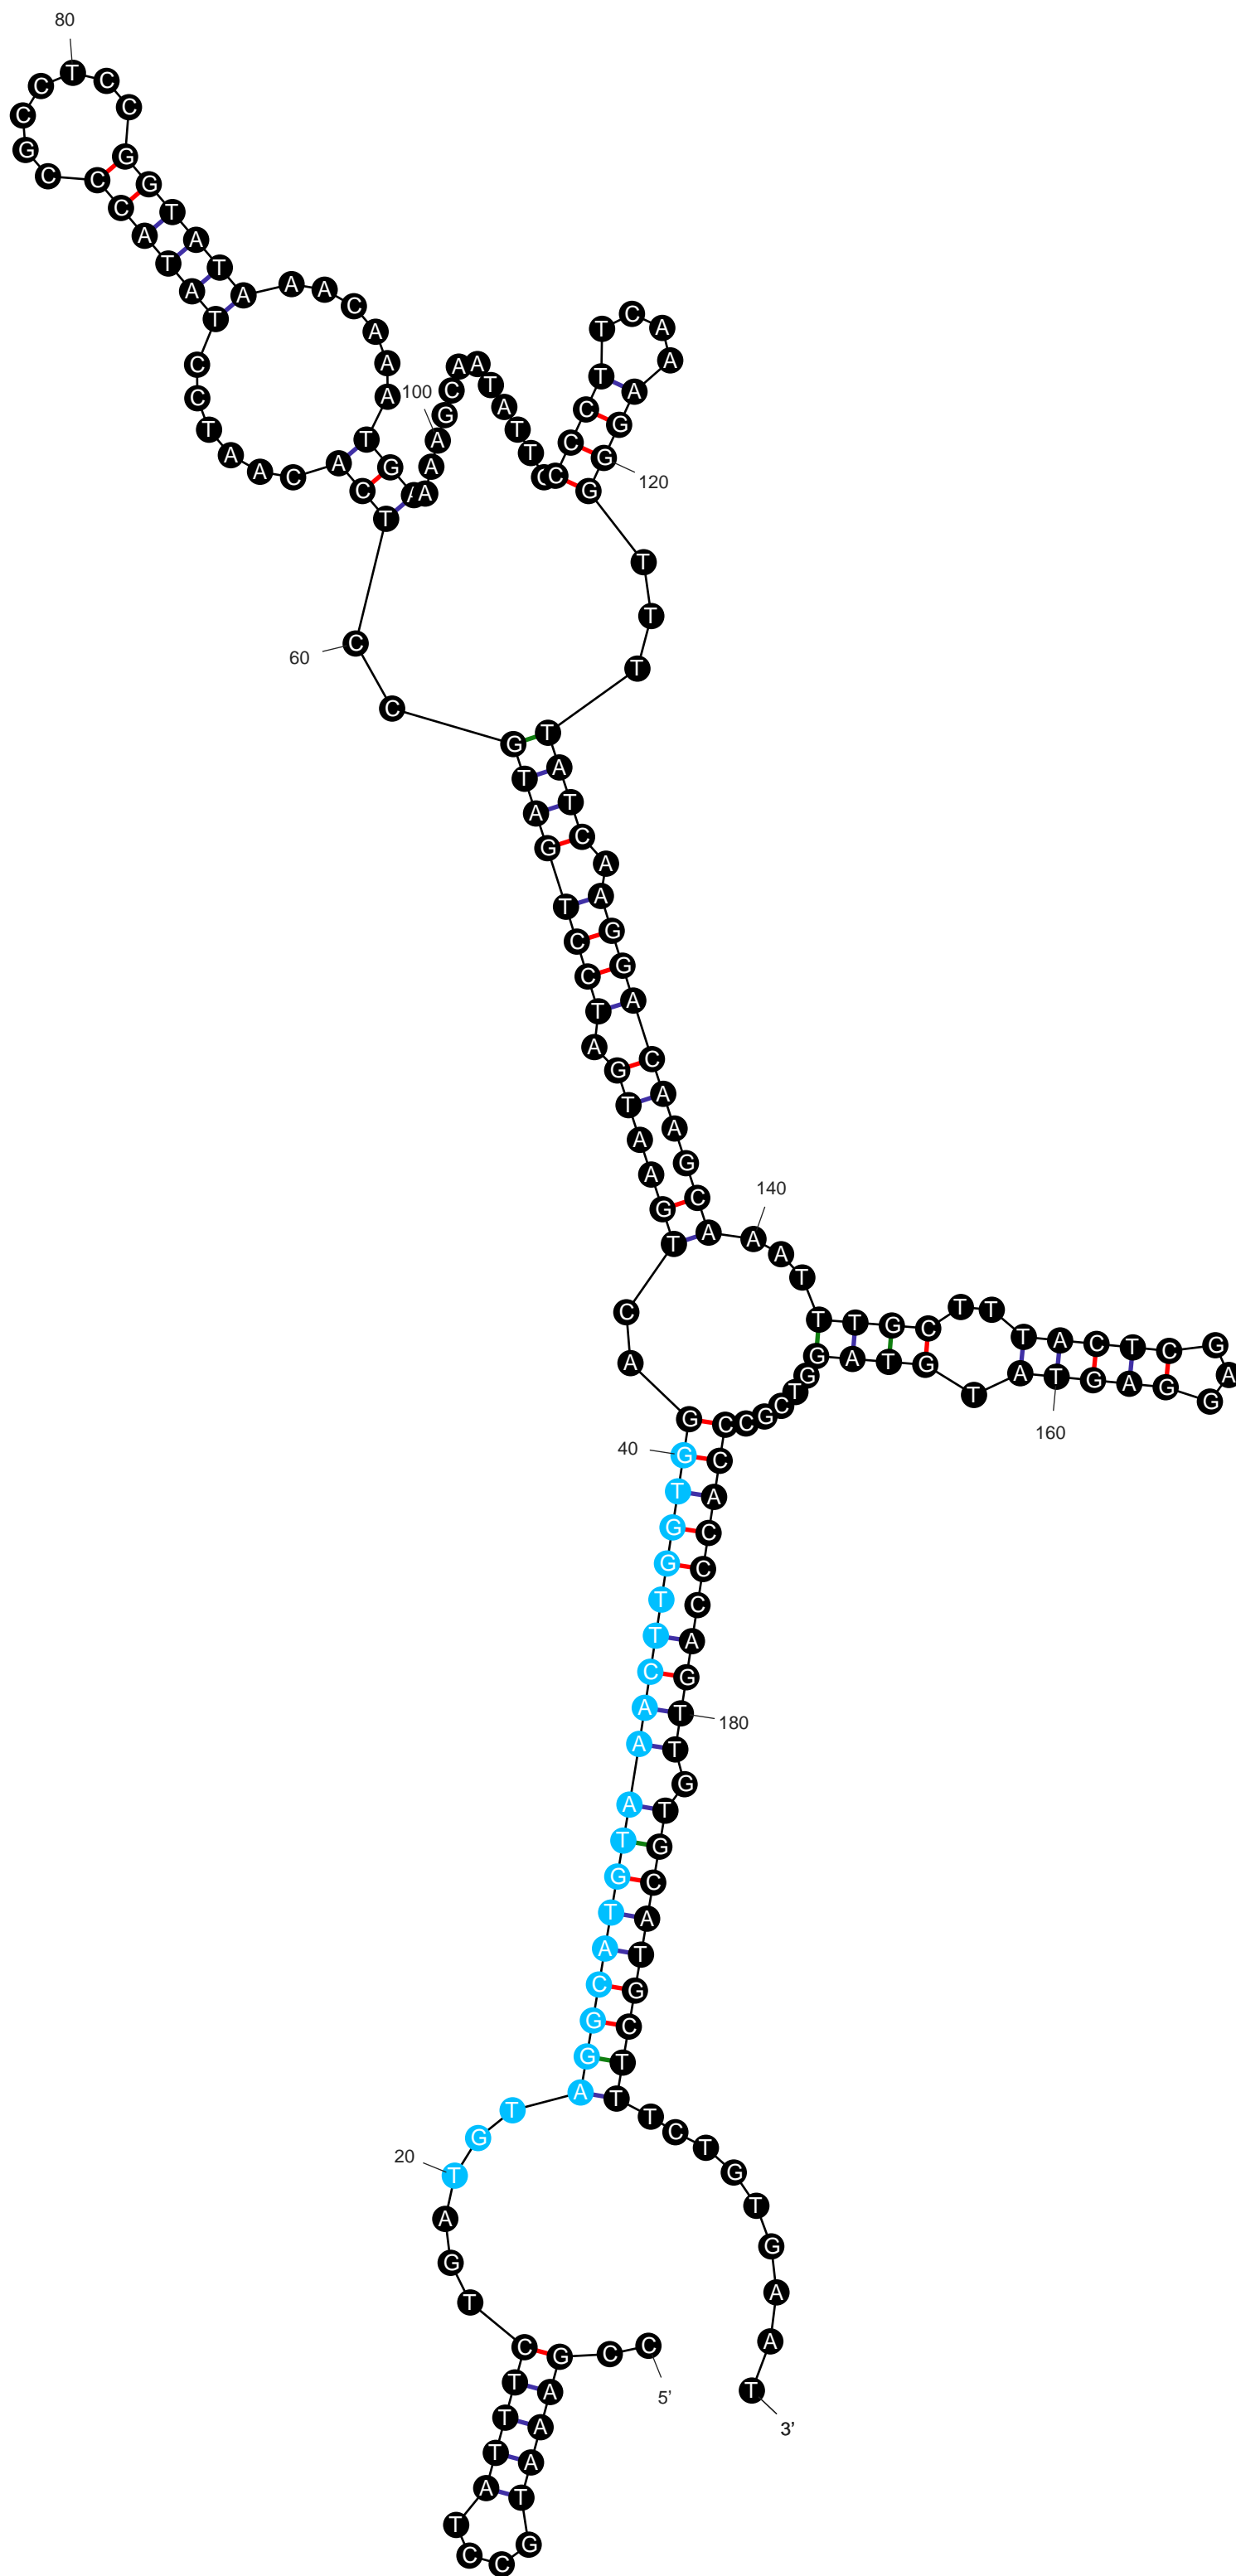

$dG = -48.00$  osa-cand062
