# Supplementary material for: High throughput sequencing reveals novel and abiotic stress-regulated microRNAs in the inflorescences of rice
Source: PubMed Central journal article supplement (PMC3431262; doi:10.1186/1471-2229-12-132), 2012-08-03
Supplement: 1471-2229-12-132-S4.pdf [file 1471-2229-12-132-S4.pdf]

```
>osa-cand002
TAGATGGACTTTCAGCACAAAAGTACATACTCACAAGCACCGAAAGAGCCCTCCCTTGTAACCTGACATCTTTCGGTGCTTGTGACTATGTATTTTGT
.....((((((((((((((((((((((((((((((((((((((((((((((((((((((((((((((((((((((((((((((((((((((((((((((((
.....AGCACAAAAGTACATACTCACAAG..... (-42.8)
.....CAAAGTACATACTCACAAGCACC..... 2
.....AAAGTACATACTCACAAGCACC..... 5
.....AAGTACATACTCACAAGCACC..... 21
.....AAGTACATACTCACAAGCACC..... 1
.....AAGTACATACTCACAAGCACC..... 8
.....AGTACATACTCACAAGCACC..... 2
.....GTACATACTCACAAGCACC..... 1
.....TACATACTCACAAGCACC..... 2
.....GTAACCTGACATCTTTCGGTGC..... 1
.....CTGACATCTTTCGGTGCTTG..... 1
.....TTTCGGTGCTTGTGACTATGT..... 1
.....TTTCGGTGCTTGTGACTATGTATT..... 3
.....TCGGTGCTTGTGACTATGTAT..... 1
.....TCGGTGCTTGTGACTATGTATTTT..... 1
.....TGCTTGTGACTATGTATTTT..... 1
```

>osa-cand003

```
TTTAGGTCAACATTTGGTCCAACTTTTCAAACCTTGATCATCAATTATTCTCAATGCTTAGTTAAAAAGGAAAAAATGGTAAGCATAGATTTTCCTTGAAAAGCACTATCATATTTCTTTATGATTTTATAAACTTATTCTATTATAAAATGATGGTCAAAATTCAAAAGTTG
...(.((...))..)(((((.((((.((((((((((.....(((..((((((.(.....))..))))))..)))..(((.....)))..))))))..))))))..(-36.8)
.....AACTTTCAAACCTTGATCA.....
.....AACTTTCAAACCTTGATCATCA.....
.....AACTTTCAAACCTTGATCATCAA.....
.....TCAATTATTCTCAATGCTTAGTT.....
```

1  
2  
23  
1







```
>osa-cand006
TCTGTTTGTACCTGTTGACTGACTCTGGTTCAACAAAACCAATTTTACTTTTGTGAACTAGAGTGGGTCAACGGGTACCCACAGAGTAATTTGTACCCA
(((((((((.....))))))))))..... (-50.7)
...TTGTACCTGTTGACTGACTC..... 1
.....TACCTGTTGACTGACTCTGGTTCA..... 8
.....ACCTGTTGACTGACTCTGGTTCAA..... 4
.....TGACTGACTCTGGTTCAACAA..... 1
.....TGACTGACTCTGGTTCAACAAAC..... 2
.....ACTCTGGTTCAACAAAACCAAT..... 2
.....ACCAATTTTACTTTTGTGAACTA..... 1
.....TTTTGTTGAACTAGAGTGGGTCAA..... 1
.....TTTGTGAACTAGAGTGGGTCAAC..... 2
.....AACTAGAGTGGGTCAACGGGTAC..... 1
.....AACTAGAGTGGGTCAACGGGTACC..... 39
```







>osa-cand009

```
TCTACTACTGTATGTAGTAGAGATACACGCACAGCAAAAAGACAATAAAGGAGAAAGAACACTAGGACCTAGAAAAAACTTTAGCGCTAAAGTTTTTTTTCTGGGTCCTAGTGCTTTTCTTCTTTATATCTTTATATCTTTTTGTTGTGCCTGTATCTCT
..((((((...))))))(((((((.....))))))(((((((.....))))))(((((((.....))))))(((((((.....))))))(((((((.....))))))(((((((.....))))))(((((((.....))))))(((((((.....))))))
.....GTATGTAGTAGAGATACACGCACA.....
.....GTAGTAGAGATACACGCACAGCA.....
.....GTAGTAGAGATACACGCACAGCAA.....
.....TAGTAGAGATACACGCACAGCAA.....
.....TAGTAGAGATACACGCACAGCAA.....
.....GTAGAGATACACGCACAGCAA.....
.....AGAGATACACGCACAGCAAAAAGA.....
.....AGATACACGCACAGCAAAAAGA.....
.....AGATACACGCACAGCAAAAAGAC.....
.....AGATACACGCACAGCAAAAAGACA.....
.....ATACACGCACAGCAAAAAGACATA.....
.....ACAGCAAAAAGACATAAAGGAGAA.....
.....CAAAAAGACATAAAGGAGAAAGA.....
.....AAAGACATAAAGGAGAAAGAACAC.....
.....CATAAAGGAGAAAGAACAACACTAGGA.....
.....TAAAGGAGAAAGAACAACACTAGGA.....
.....TAAAGGAGAAAGAACAACACTAGGACC.....
.....AAAGGAGAAAGAACAACACTAGGACCT.....
.....AAGGAGAAAGAACAACACTAGGACC.....
.....TTTTTCTGGGTCCTAGTGCT.....
.....TCCTAGTGCTTTTCTTCTTA.....
.....TTTTCTTCTTATATCTTTATATC.....
.....ATATCTTTTTGTTGTGCCTGTATC...
.....TATCTTTTTGTTGTGCCTGTATCTC.
.....ATCTTTTGTGTGCCTGTATCTC.
.....TCTTTTGTTGTGCCTGTATC...
.....TCTTTTGTTGTGCCTGTATCT...
.....TCTTTTGTTGTGCCTGTATCTC.
.....TCTTTTGTTGTGCCTGTATCTCT
.....TTTTGTTGTGCCTGTATCTCT
.....TTTTGTTGTGCCTGTATCTCT
.....TTTTGTTGTGCCTGTATCTCT
```

(-81.1)  
1  
1  
1  
2  
4  
1  
3  
3  
1  
114  
2  
1  
1  
1  
1  
1  
3  
1  
4  
1  
5  
1  
1  
6  
2  
5  
7  
81  
17  
1

```
>osa-cand010
AATCTAGAACCGGATATGACATATCCTAGTACTATGTTTAGATTTCGTAGTATTGAGATGGTGTCAAATCCGATCCTAGGTTGGTTTTTTATGGGACGGAGG
(((((((...(((...(((...(((...(((...(((...(((...(((...(((...(((...(((...(((...(((...(((...(((...(((...(((...(((...(((...
AATCTAGAACCGGATATGACA... (-37.5)
AATCTAGAACCGGATATGACATAT... 2
AATCTAGAACCGGATATGACATAT... 58
AATCTAGAACCGGATATGACATATC... 2
ATCTAGAACCGGATATGACATATC... 2
TCTAGAACCGGATATGACATATCC... 2
TAGAACCGGATATGACATATC... 1
AGAACCGGATATGACATATCCTAG... 1
AACCGGATATGACATATCCTAGT... 4
ATGACATATCCTAGTACTATGTTT... 1
ATATCCTAGTACTATGTTTAGATT... 1
GTTTAGATTTCGTAGTATTGAGAT... 1
GTATTGAGATGTGTCAAATCCGA... 1
TGAGATGTGTCAAATCCGATCCT... 1
ATGTGTCAAATCCGATCCTAGGTT... 5
ATGTGTCAAATCCGATCCTAGGTT... 39
ATGTGTCAAATCCGATCCTAGGTTG... 4
TGTGTCAAATCCGATCCTAGG... 2
TGTGTCAAATCCGATCCTAGGTTG... 2
GTGTCAAATCCGATCCTAGGTTGG... 62
TGTCAAATCCGATCCTAGGTTG... 1
TGTCAAATCCGATCCTAGGTTGG... 1
TCAAATCCGATCCTAGGTTGG... 8
CAAATCCGATCCTAGGTTGGT... 1
CAAATCCGATCCTAGGTTGGTTTT... 1
GATCCTAGGTTGGTTTTTTATGGG... 1
TCCTAGGTTGGTTTTTTATGGGA... 1
TCCTAGGTTGGTTTTTTATGGGAC... 1
CCTAGGTTGGTTTTTTATGGG... 1
CTAGGTTGGTTTTTTATGGGA... 1
CTAGGTTGGTTTTTTATGGGACGG... 1
TAGGTTGGTTTTTTATGGGAC... 3
AGGTTGGTTTTTTATGGGACGGAG... 1
GGTTGGTTTTTTATGGGACGG... 1
GGTTGGTTTTTTATGGGACGGAGG... 2
GTTGGTTTTTTATGGGACGGAG... 1
GTTGGTTTTTTATGGGACGGAG... 1
GTTGGTTTTTTATGGGACGGAGG... 1
TTGGTTTTTTATGGGACGGAG... 2
GGTTTTTTATGGGACGGAGG... 1
```



```
>osa-cand012
GGCGACCAATTACCGCCGTCATCCCTGTCCCTGCAGGCATGGGCGGCCCTACAGGGACAGGGATGACGGCAGTAATGGTCGCCCAGGTAACATAAGTAGC
((((((((((((((((((((((((((((((((((((((((((((((((((((((((((((((((((((((((((((((((((((((((((((((((((((((((
..... (-74.6)
...GACCAATTACCGCCGTCATCC... 2
...CCAATTACCGCCGTCATCC... 1
...CCAATTACCGCCGTCATCCCTG... 11
...CAATTACCGCCGTCATCCCTGT... 3
...AATTACCGCCGTCATCCCTGTC... 3
...TTACCGCCGTCATCCCTGTCC... 1
...TCATCCCTGTCCCTGCAGGCAT... 1
...TACAGGGACAGGGATGACGGC... 2
...GGGACAGGGATGACGGCAG... 1
...GGGACAGGGATGACGGCAGTA... 1
...AGGGATGACGGCAGTAATGGT... 4
...AGGGATGACGGCAGTAATGGTC... 4
...GGGATGACGGCAGTAATGGTC... 12
...GATGACGGCAGTAATGGTCGC... 4
...TGACGGCAGTAATGGTCGCC... 2
```











```
>osa-cand016a
CTCCGCCGCATACGCCAACGAGGAGGCCGGGACCGCCGGAATCCGGTGACTCCGGCCTCCTCGCCGGCAGATCCGGCCCCCTGAGGCGAGGGGGAGCCGG
.....(((.(((((((((((((.....((((.....))))))))).....((((((((((.....))))))))) (-63.6)
.....CAACGAGGAGGCCGGGACC.....1
.....AACGAGGAGGCCGGGACC.....1
.....AGGAGGCCGGGACCGCCGG.....2
.....AGGAGGCCGGGACCGCCGGA.....27
.....AGGAGGCCGGGACCGCCGAT.....16
.....AGGAGGCCGGGACCGCCGGATC.....2
.....ATCCGGTGACTCCGGCCTCCTCG.....1
.....TCCGGTGACTCCGGCCTCCTCG.....3
.....TCCGGTGACTCCGGCCTCCTCGCC.....2
.....TCCGGTGACTCCGGCCTCCTCGCG.....1
.....CCGGTGACTCCGGCCTCCTCG.....1
.....CCGGTGACTCCGGCCTCCTCGC.....2
.....CCGGTGACTCCGGCCTCCTCGCC.....3
.....CCGGTGACTCCGGCCTCCTCGCG.....1
.....CCGGTGACTCCGGCCTCCTCGC.....1
.....GGTGACTCCGGCCTCCTCGCC.....4
.....ACTCCGGCCTCCTCGCCGAGA.....1
```











```
>osa-cand020
ATTCCCTAACTTCTCAATACTTGTGTCACCTGACATGTGGACCATCTATCCAATGGGTCCGCATGTTAGTGACTCAAAGTCAGAGGATCCCGATCACGTGATTCAGGATGGGGATCTCCACGCGAGAAAGAGAGAA
... ((((((..... (((((((((((((((((((.....))))))))))))))))))))) .)) . ((. (((((((((((((((((((.....))))))))))))))))))))) .)) .))))) .))))) . (-60.3)
..... AACTTGTGTCACCTGACATGTGGAC..... 3
..... AACTTGTGTCACCTGACATGTGGAC..... 35
..... AACTTGTGTCACCTGACATGTGGACC..... 1
..... ACTTGTGTCACCTGACATGTGGACC..... 11
..... CTTGTGTCACCTGACATGTGGACC..... 1
..... TTGTGTCACCTGACATGTGGACCAT..... 1
..... ATGTGGACCATCTATCCAATGGGT..... 1
..... TCTATCCAATGGGTCCGCATGTT..... 1
..... CATGTTAGTGACTCAAAGTCAGA..... 1
..... GTTAGTGACTCAAAGTCAGAGGAT..... 1
..... AGTCAGAGGATCCCGATCACGTG..... 1
```





```
>osa-cand022
TCCCTCTGGTCCAAATTAAGTTCACTTTTGTACATGAATTGGACATAGGTTATATCCAGATTCATGTACAAAAGTGAATTTATTTGGCACGAAGGTAG
..(((.(((((.((((((((((((((((((((((((((((((((((((((((((((((((((((((((((((((((((((((((((((((((((((((((((((((((
.....ATTAAGTTCACTTTGTACATGAA..... 1
.....TTAAGTTCACTTTGTACATGAAT..... 1
.....TAAGTTCACTTTGTACATGAATT..... 3
.....AGTTCACTTTGTACATGAATTGG..... 1
.....GTTACATTTTGTACATGAATTGG..... 2
.....TTCACTTTGTACATGAATT..... 1
.....TTCACTTTGTACATGAATTGG..... 1
.....TTCACTTTGTACATGAATTGGGA..... 30
.....ACTTTGTACATGAATTGGACA..... 1
.....ACTTTGTACATGAATTGGACAT..... 4
.....TACATGAATTGGACATAGGT..... 1
.....TACATGAATTGGACATAGGTTATATC..... 1
.....ACATGAATTGGACATAGGTTATAT..... 1
.....ATCCAGATTCATGTACAAAAGTGA..... 9
```





```
>osa-cand025
AAAAAATCAACCTAGTATTGAAGGTAATATTTCTAGTATAACGAATCTGGACAGGCTGTCCATATTCGTTGTAATAGGAAATGTCACCTTAATACTAGGCTGGTTTTCTTTGGTCGGA
... (((((( (((((( (((((( (((((( (((((( (((((( (((((( (((((( (((((( (((((( (((((( (((((( (((((( (((((( (((((( (((((( (((((( ((((((
.AAAAAATCAACCTAGTATTGA... (-53.4)
.AAAAAATCAACCTAGTATTGAAGG...
.AAAAAATCAACCTAGTATTGAAGGT...
...ATCAACCTAGTATTGAAGGTAATA...
...TAGTATTGAAGGTAATATTTTC...
...AGTATTGAAGGTAATATTTTCT...
...AATATTTTCTAGTATAACGAATCT...
...TATTTTCTAGTATAACGAATCTGG...
...ATTTTCTAGTATAACGAATCTGGA...
...TTCTAGTATAACGAATCTGGA...
...TTCTAGTATAACGAATCTGGACA...
...CTAGTATAACGAATCTGGACA...
...TAGTATAACGAATCTGGACAGG...
...TAGTATAACGAATCTGGACAGGCT...
...AGTATAACGAATCTGGACAGGCT...
...AGGCTGTCCATATTCGTTGTAATA...
...CTGTCCATATTCGTTGTAATAGGA...
...ATTCGTTGTAATAGGAAATGTCAC...
...AGGAAATGTCACCTTAATACTAGG...
...AAATGTCACCTTAATACTAGG...
...AAATGTCACCTTAATACTAGGCT...
...AATGTCACCTTAATACTAGGCTGG...
...AATACTAGGCTGGTTTTCTTTGGT...
```

```
1
2
2
1
56
1
3
1
4
2
1
1
1
1
1
1
2
6
1
96
1
3
2
```



>osa-cand027

```
TGTGTTAGATTGGCTTGGAGTGGTGACAACCTGGTAGCAGAGCAATGTCATCTCCACTTGCCGGTTGTTCTTGGTATGTCGAGGGATACTGGTGCTGACATTGCTCTGATACCAATTGTCGGCACTCTAGGCCAATCATAC
... (((((((((((((((((((((((((((((((((((((((((((((((((((((((((((((((((((((((((((((((((((((((((((((((((((((((((((((((((((((((((((((((((((((((((((
TGTGTTAGATTGGCTTGGAGT... (-73.2)
... GTTAGATTGGCTTGGAGTGGT... 88
... GTTAGATTGGCTTGGAGTGGTGAC... 2
... TTAGATTGGCTTGGAGTGGT... 45
... TTAGATTGGCTTGGAGTGGTGA... 1
... TTGGCTTGGAGTGGTGACAAC... 3
... TTGGCTTGGAGTGGTGACAAC... 1
... TTGGAGTGGTGACAACCTGGTA... 3
... TGGAGTGGTGACAACCTGGTA... 2
... TGGAGTGGTGACAACCTGGTAG... 5
... GTGACAACCTGGTAGCAGAGCAATG... 1
... TGACAACCTGGTAGCAGAGCA... 1
... TGACAACCTGGTAGCAGAGCAA... 28
... TGACAACCTGGTAGCAGAGCAATG... 1
... GACAACCTGGTAGCAGAGCAAT... 3
... GACAACCTGGTAGCAGAGCAATG... 2
... GACAACCTGGTAGCAGAGCAATGTC... 4
... ACAACCTGGTAGCAGAGCAATG... 1
... ACAACCTGGTAGCAGAGCAATGTCA... 1
... CAACCTGGTAGCAGAGCAATGT... 3
... CAACCTGGTAGCAGAGCAATGTC... 1
... AACTGGTAGCAGAGCAATGTC... 18
... AACTGGTAGCAGAGCAATGTCA... 1
... AACTGGTAGCAGAGCAATGTCA... 28
... ACTGGTAGCAGAGCAATGTC... 1
... ACTGGTAGCAGAGCAATGTCA... 1
... ACTGGTAGCAGAGCAATGTCA... 1
... ACTGGTAGCAGAGCAATGTCA... 1
... TGGTAGCAGAGCAATGTCACTCC... 1
... TAGCAGAGCAATGTCACTCC... 1
... TACTGGTGCTGACATTGCTCTGAT... 1
... TGGTGCTGACATTGCTCTGAT... 3
... GCTGACATTGCTCTGATACCAAT... 1
... TGACATTGCTCTGATACCAAT... 3
... TGACATTGCTCTGATACCAAT... 3
... TGACATTGCTCTGATACCAATTGT... 6
... CATTGCTCTGATACCAATTGTCGG... 5
... ATTGCTCTGATACCAATTGTC... 7
... ATTGCTCTGATACCAATTGTCGG... 1
... ATTGCTCTGATACCAATTGTCGGC... 7
... TTGCTCTGATACCAATTGTCG... 20
... TTGCTCTGATACCAATTGTCGG... 71
... TTGCTCTGATACCAATTGTCGGCA... 1
... TGCTCTGATACCAATTGTC... 3
... TGCTCTGATACCAATTGTCG... 8
... TGCTCTGATACCAATTGTCGG... 2326
... TGCTCTGATACCAATTGTCGGC... 1
... GCTCTGATACCAATTGTCGG... 4
... GCTCTGATACCAATTGTCGGC... 2
... TCTGATACCAATTGTCGGCAC... 1
... TCTGATACCAATTGTCGGCACT... 1
... CTGATACCAATTGTCGGCACTC... 1
... TGATACCAATTGTCGGCACTC... 4
... TACCAATTGTCGGCACTCTAG... 1
... CAATTGTCGGCACTCTAGG... 1
... AATTGTCGGCACTCTAGGCCAATC... 5
```











>osa-cand032

```
AAAAATCTGGACTGTTTGGGGGAGCTTCTGACAGCTGCAGTTTCTTCTGTCTAGGAGAGAGCTGCAGCTGTTCAGAAAGCTCCCAACATGGCCTAAAGCT
.....((.((((((((((((((((((((((((((((((((((((((((((((((((((((((((((((((((((((((((((((((((((((((((((((((((
.....TGGACTGTTTGGGGGAGCTTC.....(-73.9)
.....GGGGGAGCTTCTGACAGCTGCAGT.....1
.....AGCTTCTGACAGCTGCAGTT.....1
.....AGCTTCTGACAGCTGCAGTTTCT.....1
.....AGCTTCTGACAGCTGCAGTTTCT.....6
.....AGCTTCTGACAGCTGCAGTTTCTCT.....86
.....GCTTCTGACAGCTGCAGTTTCT.....1
.....GCTTCTGACAGCTGCAGTTTCTCT.....3
.....CTTCTGACAGCTGCAGTTTCTCT.....26
.....TTCTGACAGCTGCAGTTTCTCT.....7
.....TTCTGACAGCTGCAGTTTCTCT.....4
.....TTCTGACAGCTGCAGTTTCTCT.....2
.....TTCTGACAGCTGCAGTTTCTCTT.....1
.....TTCTGACAGCTGCAGTTTCTCTTG.....1
.....TCTGACAGCTGCAGTTTCTCT.....1
.....TGACAGCTGCAGTTTCTCTTG.....3
.....TGACAGCTGCAGTTTCTCTTGT.....2
.....CTAGGAGAAGCTGCAGCTGTC.....1
.....GGAGAAGCTGCAGCTGTCAGAAGC.....1
.....GAGAAGCTGCAGCTGTCAGA.....1
.....AGAAGCTGCAGCTGTCAGAA.....1
.....AGAAGCTGCAGCTGTCAGAAGC.....2
.....AGAAGCTGCAGCTGTCAGAAGCT.....3
.....AGAAGCTGCAGCTGTCAGAAGCTC.....149
.....GAAGCTGCAGCTGTCAGAAGCT.....6
.....GAAGCTGCAGCTGTCAGAAGCTC.....6
.....GAAGCTGCAGCTGTCAGAAGCTCC.....299
.....GAAGCTGCAGCTGTCAGAAGCTCCC.....1
.....AAGCTGCAGCTGTCAGAA.....1
.....AAGCTGCAGCTGTCAGAAGCT.....3
.....AAGCTGCAGCTGTCAGAAGCTC.....5
.....AAGCTGCAGCTGTCAGAAGCTCC.....1
.....AAGCTGCAGCTGTCAGAAGCTCCC.....1
.....AGCTGCAGCTGTCAGAAGCTCCC.....2
.....GCTGCAGCTGTCAGAAGCTCCCC.....1
.....GCTGCAGCTGTCAGAAGCTCCCCC.....2
.....TGCAGCTGTCAGAAGCTCCCCCA.....1
```

```
>osa-cand033
CGAATCGAGCCTAAGACAAGTCGAGCTTGAGCAGCTCGTGAGCCTCGAGCTTTTTTTTTTTTTTGACAACCTCGAGGCTCGCGTGCTCTTCATATAGCGAAA
((((((((.....(.....))..))))))..(((.....(((.....(((.....((.....))..)))))))))..)).....)..... (-36.6)
..AATCGAGCCTAAGACAAGTCGA..... 1
.....AGCCTAAGACAAGTCGAGCTTGAG..... 1
.....TTGACAACCTCGAGGCTCGCG..... 24
```

```
>osa-cand034
TTAATAAACCTATTTATAGGTCAAATTAGTAAGTAACCCACGAGTCAACCCGCGGGTTACTCACTAATTTGCCTATAAACGGGTCGCGGGTTGCCCCG
.....((((((((((((((((((((((((((((((((((((((((((((((((((((((((((((((((((((((((((((((((((((((((((((((((((((
.....ATTTATAGGTCAAATTAGTAAGT..... 1
.....ATTTATAGGTCAAATTAGTAAGTA..... 1
.....TATAGGTCAAATTAGTAAGTAACC..... 5
.....GTAACCCACGAGTCAACCCGCGGG..... 1
.....AACCCGCGGGTTACTCACTAATTT..... 1
.....TTACTCACTAATTTGCCTATA..... 2
.....TTACTCACTAATTTGCCTATAA..... 1
.....TTACTCACTAATTTGCCTATAAA..... 14
.....TCACTAATTTGCCTATAAACGG..... 1
.....CACTAATTTGCCTATAAACGGG..... 2
.....ACTAATTTGCCTATAAACGGGT..... 2
.....ATTTGCCTATAAACGGGTCGCG..... 1
```





















```
>osa-cand041
TGTTGGATTGATTGACAATGTGATCCATTAGTCCATTTCATTTAATTTGCTCGCCTTTTCTCCCCTCGGTGTTCATTGCTAATTACATTTGTAAAGAGGGGAAAATGAGGTGGCATTACTATTATTTTTATAAT
((.( ((((( (. (( (. ( . ) ) ) ) ) . . . ) ) ) ) ) . . ) . . . ) . . . . . ) . . . . . ((.( ((((( (. (( ((((( (. ( . . . ) . . (( (. . . ) ) ) . . ) ) ) ) ) . . . ) ) ) ) ) ) ) . . . . . ) . . . . . (-38.9)
. . . . . TTTGATTGACAATGTGATCCATT . . . . . TGCTCGCCTTTTCTCCCCTCG . . . . . 1
. . . . . . . . . . TGCTCGCCTTTTCTCCCCTCG . . . . . 1
. . . . . . . . . . GCTCGCCTTTTCTCCCCTCG . . . . . 1
. . . . . . . . . . CTCGCCTTTTCTCCCCTCG . . . . . 1
. . . . . . . . . . TCGCCTTTTCTCCCCTCG . . . . . 1
. . . . . . . . . . TTCTTCCCCTCGGTGTTCATT . . . . . 1
. . . . . . . . . . . AAGAGGGGAAAATGAGGTGGCATTACT . . . . . 1
. . . . . . . . . . . AGAGGGGAAAATGAGGTGGC . . . . . 1
. . . . . . . . . . . AGAGGGGAAAATGAGGTGGCAT . . . . . 1
. . . . . . . . . . . GAGGGGAAAATGAGGTGGC . . . . . 1
. . . . . . . . . . . GAGGGGAAAATGAGGTGGCA . . . . . 11
. . . . . . . . . . . GAGGGGAAAATGAGGTGGCAT . . . . . 1
```



>osa-cand042

```
ATTCAACTAATCATGTGCCAATGGCTTGTCTTGTCTTGTGTGCCATAAAAAACACTAGGCTCAGTTCGGAATGAGTGTGGCTTGAATTTTGTATGGCACGCAAACGAGCCAAGTCATT
.....((((((((((((((((((((((((((((((((((((((((((((((((((((((((((((((((((((((((((((((((((((((((((((((((((((((((((((
.....CAATGGCTTGTCTTGTCTTGTGTG.....13
.....CAATGGCTTGTCTTGTCTTGTGTGCCA.....1
.....AATGGCTTGTCTTGTCTTGTGT.....1
.....AATGGCTTGTCTTGTCTTGTGT.....5
.....AATGGCTTGTCTTGTCTTGTGTG.....225
.....ATGGCTTGTCTTGTCTTGTGT.....1
.....ATGGCTTGTCTTGTCTTGTGTG.....2
.....ATGGCTTGTCTTGTCTTGTGTGCC.....2
.....TGGCTTGTCTTGTCTTGTGTGCC.....1
.....TGGCTTGTCTTGTCTTGTGTGCCA.....1
.....GCTTGTCTTGTCTTGTGTG.....1
.....GCTTGTCTTGTCTTGTGTGCCATAA.....1
.....TCTTGTCTTGTGTGCCATAAAA.....1
.....CTTGTCTTGTGTGCCATAAAAAAC.....1
.....TGTGTGCCATAAAAAACACTAGGC.....1
.....ATTTTGTATGGCACGCAAACGAG.....1
.....TTTGTATGGCACGCAAACGAGCCA.....1
.....GCACGCAAACGAGCCAAGTCATT.....1
.....ACGCAAACGAGCCAAGTCATT.....1
```

>osa-cand043

```
AAAGTTGTTTGGCTACTGGTAAATCAAGTTAGGAACCATGCAAGTTGTTTATGAGTTGTGCCCTCTGTGCCCTAGCGCCATAGATGACTTGCAAGATTCTAACTTGAGTGCCAGTGTCCAA
..... (((((((((((((((((((((((((((((((((((((((((((((((((((((((((((((((((((((((((((((((((((((((((((((((((((((((((((
..... TTTGGCTACTGGTAATCAAGT..... (-51.4)
..... TTGGCTACTGGTAATCAAGTTAGG.....
..... CTAAGTGGTAATCAAGTTAGGA.....
..... AATCAAGTTAGGAACCATGCAAG.....
..... AATCAAGTTAGGAACCATGCAAGT.....
..... AATCAAGTTAGGAACCATGCAAGTT.....
..... ATCAAGTTAGGAACCATGCAAGTT.....
..... AAGTTAGGAACCATGCAAGTTGTT.....
..... AGTTAGGAACCATGCAAGTTG.....
..... AGTTAGGAACCATGCAAGTTGTTT.....
..... AGATGACTTGCAAGATTCTAACT.....
..... ATGACTTGCAAGATTCTAACTTG.....
..... CTGCAAGATTCTAACTTGAGTG.....
..... TTGCAAGATTCTAACTTGAGTG.....
..... TTGCAAGATTCTAACTTGAGTGC.....
..... TGCAAGATTCTAACTTGAGT.....
..... CAAGATTCTAACTTGAGT.....
```

```
>osa-cand044
CCTCCGTCGAAAATGAACCAACTTTTGTATGTGAATATGGACATAGGCTATGTCTATATTCATTACAAAAGTTGGTTTATTTTGGACGGAGGAAGTA
((((((((((((((((((((((((((((((((((((((((((((((((((((((((((((((((((((((((((((((((((((((((((((((((((((
..... (-67.1)
.....GTCCGAAAATGAACCAACTTTTGT.....1
.....GAAAATGAACCAACTTTTGTATGT.....1
.....AAAATGAACCAACTTTTGTATGT.....4
.....ATGAACCAACTTTTGTATGT.....1
.....TGAACCAACTTTTGTATGTGAATA.....1
.....AACCAACTTTTGTATGTGAATA.....1
.....AACCAACTTTTGTATGTGAATATG.....11
.....AACTTTTGTATGTGAATATGGA.....1
.....AACTTTTGTATGTGAATATGGACA.....101
.....ACTTTTGTATGTGAATATGGACAT.....2
.....TATGTGAATATGGACATAGGC.....1
.....GTCTATATTCATTACAAAAGTT.....1
.....TCTATATTCATTACAAAAGTTGG.....2
.....TATTCATTTACAAAAGTTGGTT.....2
.....TATTCATTTACAAAAGTTGGTTA.....1
.....TTCATTTACAAAAGTTGGTTATT.....1
.....TTACAAAAGTTGGTTATTT.....2
.....AAAAGTTGGTTATTTTGGGA.....1
.....AAAGTTGGTTATTTTGGAC.....1
.....AAGTTGGTTATTTTGGACG.....1
.....TTGGTTATTTTGGACGGAG.....3
```

```
>osa-cand045
GTAGATACTCCCTCCGTCCCAATATGTAGCAACCTAGGATGGGTCTAATCCCATCCTAGGTTAACATATTGGGATGGAGGTGTAATAATTTGATATTTGT
.....((((((((((((((((((((((((((((((((((((((((((((((((((((((((((((((((((((((((((((((((((((((((((((((((((((((((((((
.....ACTCCCTCCGTCCCAATATGTAGC..... (-55.2)
.....TCCGTCCCAATATGTAGCAACC..... 1
.....TCCGTCCCAATATGTAGCAACCTA..... 5
.....CGTCCAATATGTAGCAACCTAGG..... 1
.....GTCCAATATGTAGCAACCTAGGA..... 1
.....TCCAATATGTAGCAACCTAGGA..... 2
.....TCCAATATGTAGCAACCTAGGAT..... 6
.....CCAATATGTAGCAACCTAGGAT..... 1
.....CCAATATGTAGCAACCTAGGATG..... 3
.....CCAATATGTAGCAACCTAGGA..... 2
.....CCAATATGTAGCAACCTAGGAT..... 2
.....CCAATATGTAGCAACCTAGGATGG..... 1
.....CAATATGTAGCAACCTAGGATG..... 1
.....CAATATGTAGCAACCTAGGATGG..... 1
.....CAATATGTAGCAACCTAGGATGGG..... 29
.....AATATGTAGCAACCTAGGATG..... 2
.....AATATGTAGCAACCTAGGATGG..... 1
.....AATATGTAGCAACCTAGGATGGGT..... 27
.....ATATGTAGCAACCTAGGATGGG..... 2
.....ATATGTAGCAACCTAGGATGGGT..... 3
.....ATATGTAGCAACCTAGGATGGGTC..... 3
.....TATGTAGCAACCTAGGATGGG..... 2
```





```
>osa-cand048
TCTGAAGGTAAGAGTTGTAGGAACTGAACCTTTCTTGTTCAGTGACAGTTTCAGGAGCTCAGTTTCTCCAACATCTTACTTCGGCGCCTTAATCTTT
.((((((((((((((((((((((((((((((((((((((((((((((((((((((((((((((((((((((((((((((((((((((((((((((((((((
..... (-40.2)
.....CTCAGTTTCTCCAACATCTT..... 1
.....CTCAGTTTCTCCAACATCTTA..... 29
```

```
>osa-cand049
TGCAAAGAACACAAATCAGCACTTCAGCAGTACATCACATCATCATCCTCCTCAGCCTCATCTTCAGCTCAAGTGTGATTGTGTTCTTTGCATTATATGGTTGGAGTTGGAC
((((((((((((((((((((((((((((((((((((((((((((((((((((((((((((((((((((((((((((((((((((((((((((((((((((((((
.....(((.....))) (-49.4)
.....TGATTGTGTTCTTTGCATT..... 45
```







```
>osa-cand052a
TAAGCAGCAACAATTTTCATCAACAAGAAGTTGTATATCTTTTCTCCCGGTCAACGACAATCTTGATAAAGACAAGGTTGCTTCTTGATGGTCGATGATGGGTAGAGATGAAGATGATACAACTTCTTACCTCTTCT
(((.(. .... (((((((((((((((((((((((((((((((((((((((((((((((((((((((((((((((((((((((((((((((((((((((((((((((((((((((((((((((((((((((((((
AGCAGCAACAATTTTCATCAACA... (-59.1)
...CAACAATTTTCATCAACAAGAAGT... 2
...AATTTTCATCAACAAGAAGTTGTA... 1
...AGTTGTATATCTTTTCTCCCGGTC... 1
...ATCTTTTCTCCCGGTCAACGACAA... 1
...AACGACAATCTTGATAAAGACAAG... 1
...ACGACAATCTTGATAAAGACAAGG... 1
...TTGATAAAGACAAGGTTGCTTCTT... 1
...AAAGACAAGGTTGCTTCTTGATGG... 2
...AAGACAAGGTTGCTTCTTGATGGT... 1
...AGACAAGGTTGCTTCTTGATGGTC... 1
...CAAGGTTGCTTCTTGATGGTCG... 1
...CAAGGTTGCTTCTTGATGGTCGAT... 1
...AGGTTGCTTCTTGATGGTCGAT... 1
...GGTTGCTTCTTGATGGTCGATGAT... 1
...TTGCTTCTTGATGGTCGATGATG... 1
...TTGATGGTCGATGATGGGTAGAGA... 3
...TGATGGTCGATGATGGGTAGA... 1
...TGATGGTCGATGATGGGTAGAGAT... 4
...TGGTTCGATGATGGGTAGAGATGAA... 1
...GATGATGGGTAGAGATGAAGATG... 1
...GATGATGGGTAGAGATGAAGATGA... 1
...ATGATGGGTAGAGATGAAGATGAT... 2
...TGATGGGTAGAGATGAAGATGATA... 1
...TGGGTAGAGATGAAGATGATACA... 1
...GGGTAGAGATGAAGATGATACAAC... 1
...GTAGAGATGAAGATGATACAAC... 1
...ATGAAGATGATACAACCTTCTTGT... 1
...GAAGATGATACAACCTTCTTGTGA... 1
...AAGATGATACAACCTTCTTGTGAT... 2
...GATGATACAACCTTCTTGTGATGG... 1
...ATGATACAACCTTCTTGTGATGG... 1
...ATGATACAACCTTCTTGTGATGGA... 2
...TGATACAACCTTCTTGTGATGGA... 1
...GATACAACCTTCTTGTGATGGAAA... 4
...ATACAACCTTCTTGTGATGGAAAC... 1
...TACAACCTTCTTGTGATGGAAA... 1
...TACAACCTTCTTGTGATGGAACT... 140
...ACAACCTTCTTGTGATGGAACT... 1
...CTTCTTGTGATGGAACTATTAC... 1
```

>osa-cand052b

```
AACAACAACAATTTTCATCAGCAAGAAGTTGTATATATCTTCTCTACCCATATATGACCATCTTAATAAAGGCAAGGTTGTTCCCTTATTGGTTGAATATGGATGGAGAAGAAGATTATACAACCTCTTGTGTGATGGAACTATTGCTTCTTCTCTTCT
.... (((((((((((((((((((((((((((((((((((((((((((((((((((((((((((((((((((((((((((((((((((((((((((((((((((((((((((((((((((((((((((((((((((((((((((((((
TTTTCATCAGCAAGAAGTTGT..... (-61.3)
TTTTCATCAGCAAGAAGTTGTA..... 2
TTTTCATCAGCAAGAAGTTGTA..... 1
TTTTCATCAGCAAGAAGTTGATA..... 7
.....CATCTTAATAAAGGCAAGGTTGTT..... 1
.....TGGTTGAATATGGATGGAGAAGA..... 1
.....TTGAATATGGATGGAGAAGAAGAT..... 1
.....GAATATGGATGGAGAAGAAGATT..... 1
.....AAGATTATACAACCTCTTGTGTGAT..... 1
.....ATACAACCTCTTGTGTGATGGAAAC..... 1
.....TACAACCTCTTGTGTGATGGAAA..... 1
.....TACAACCTCTTGTGTGATGGAACT..... 140
.....ACAACCTCTTGTGTGATGGAACT..... 1
```



```
>osa-cand054
AGGAAAAATTCATTTTATGCCACTCTATTTCGCAAGTCTTTTGGAAATTGCCAAGGAGCAAATTCGAAAGTCGCAAGAACTGGGTGGCAGGTTCTGAAAGGCTTGTGAATCGAGTGGCGTATAATGAAATTTCTAAGTG
.((((...(((((((((((((((((((((((((((((((((((((((((((((((((((((((((((((((((((((((((((((((((((((((((((((((((((((((((((((((((((((((((((((((((
TTATGCCACTCTATTTCGCAAG
TTATGCCACTCTATTTCGCAAGT
TTATGCCACTCTATTTCGCAAGTCT
TATGCCACTCTATTTCGCAAGTCTT
TGCCACTCTATTTCGCAAGTCTTT
TGCCACTCTATTTCGCAAGTCTTTT
GCCACTCTATTTCGCAAGTCTTT
CCACTCTATTTCGCAAGTCTTT
CCACTCTATTTCGCAAGTCTTTT
CCACTCTATTTCGCAAGTCTTTTGG
CCACTCTATTTCGCAAGTCTTTTGGAA
ACTCTATTTCGCAAGTCTTTTGG
ACTCTATTTCGCAAGTCTTTTGG
ACTCTATTTCGCAAGTCTTTTGGAA
ACTCTATTTCGCAAGTCTTTTGGAA
ATTTCGCAAGTCTTTTGGAAAT
ATTTCGCAAGTCTTTTGGAAATTGC
GCAGGTTCTGAAAGGCTTGTGAAT
AGGTTCTGAAAGGCTTGTGAATCG
TGAAAGGCTTGTGAATCGAGTG
TGAAAGGCTTGTGAATCGAGTGG
TGAAAGGCTTGTGAATCGAGTGGC
GAAAGGCTTGTGAATCGAGTG
GAAAGGCTTGTGAATCGAGTGG
GAAAGGCTTGTGAATCGAGTGGC
GAAAGGCTTGTGAATCGAGTGGCG
AAAGGCTTGTGAATCGAGTGG
AAAGGCTTGTGAATCGAGTGGC
AAGGCTTGTGAATCGAGTGGC
AAGGCTTGTGAATCGAGTGGCG
AAGGCTTGTGAATCGAGTGGCGT
AAGGCTTGTGAATCGAGTGGCGTA
AGGCTTGTGAATCGAGTGGCG
AGGCTTGTGAATCGAGTGGCGT
CTTGTGAATCGAGTGGCG
CTTGTGAATCGAGTGGCGTAT
TGAATCGAGTGGCGTATAATGAAA
```

```
(-66)
10
1
3
1
1
3
1
1
1
5
2
1
5
2
12
2
3
1
2
2
1
6
1
1
9
167
1
1
2
4
12
1
1
3
1
```











>osa-cand059

```
CAGCTGACATGGCATGCCAATGTGTAGCCACATTGTAAAGGGAGTCCTTGTGCACATGGTCAATCTCGCAGAAAGCCCCTGCAATCCAATCTTCTCAGATTGTTCCTATTACCAAATCACCCTCTTCTCGAATGACCGCCACCATTCCCTCTGTGTGCTGTGCTAACATCCATGGCCCAGGGACCCACTTGCAGCGTGGCTACATGTGGCATGC
.....(((((((.....((((((((.....((((((((.....((((((((.....((((((((.....((((((((.....((((((((.....((((((((.....((((((((.....((((((((.....((((((((.....((((((((.....((((((((.....)))))))))))))
.....ATGCCATGTGTAGCCACATTGTAA.....((((((((.....((((((((.....((((((((.....((((((((.....((((((((.....((((((((.....((((((((.....((((((((.....((((((((.....))))))))))))) (-80.2)
.....ATGTGTAGCCACATTGTAAAGGG.....1
.....TGTGTAGCCACATTGTAAAGG.....1
.....TGTGTAGCCACATTGTAAAGGG.....204
.....GTGTAGCCACATTGTAAAGGGA.....5
.....GTGTAGCCACATTGTAAAGGGAGTC.....1
.....TGTAGCCACATTGTAAAGGG.....1
.....TGTAGCCACATTGTAAAGGGAG.....1
.....GTAGCCACATTGTAAAGGGAGTCTT.....1
.....TAGCCACATTGTAAAGGGAGTCTT.....2
.....ACTTGCAGCGTGGCTACATGTGGC.....1
.....CTTGCAGCGTGGCTACATGTG.....14
.....TTGCAGCGTGGCTACATGTGG.....5
```



```
>osa-cand061
GCGCGTGAGCAGCAGCTGCTGCTCCCTTTCCTTGCAACGACATTGCCCTGCCAAAGATGCTTCATACCCAACGTCATGGTAAGGAAAGGTAGCAGTAGCTGCTGCTCTCGCGGATGAG
((((((((((((((((((((((((((((((((((((((((((((((((((((((((((((((((((((((((((((((((((((((((((((((((((((((((((((((((((((
((((((((((((((((((((((((((((((((((((((((((((((((((((((((((((((((((((((((((((((((((((((((((((((((((((((((((((((((((((
TGCTGCTCCCTTTCCTTGCAACG..... (-69.6)
.....ATGTAAGGAAAGGTAGCAGTAGC..... 1
.....GTAAGGAAAGGTAGCAGTAGCTG..... 29
.....GTAAGGAAAGGTAGCAGTAGCTG..... 1
.....TAAGGAAAGGTAGCAGTAGCT..... 2
.....TAGCAGTAGCTGCTGCTCTCGCGC..... 1
.....AGCAGTAGCTGCTGCTCTCGC..... 1
```
